# Supplementary material
Source: PubMed Central journal article supplement (PMC3164517)
Supplement: NIHMS309339-supplement-Appendices_1___2.pdf [file NIHMS309339-supplement-Appendices_1___2.pdf]

**Appendix 1: Glossary for No Confounders, LVH, LAFB, RBBB, RBBB+LAFB**

| DEFINITIONS                                                                                                                                                                                                                                                                                                                                                                                                                                                                                                                                                                                                                                                                                                                                                                                                                                                                                                                                                                                                                                                                                                                                                                                                                                                                                                                                                                                                                                                                                                                                                                                                                                                                                       | ILLUSTRATIONS |
|---------------------------------------------------------------------------------------------------------------------------------------------------------------------------------------------------------------------------------------------------------------------------------------------------------------------------------------------------------------------------------------------------------------------------------------------------------------------------------------------------------------------------------------------------------------------------------------------------------------------------------------------------------------------------------------------------------------------------------------------------------------------------------------------------------------------------------------------------------------------------------------------------------------------------------------------------------------------------------------------------------------------------------------------------------------------------------------------------------------------------------------------------------------------------------------------------------------------------------------------------------------------------------------------------------------------------------------------------------------------------------------------------------------------------------------------------------------------------------------------------------------------------------------------------------------------------------------------------------------------------------------------------------------------------------------------------|---------------|
| <p><b>Q-Wave:</b> When the first deflection of the QRS complex is negative, it is termed a “Q wave”. It can be seen as “smooth Q” or “notched Q.”</p> <p><b>Smooth Q:</b> Present if there is no reversal in direction <math>\geq 0.05</math> mV in the first negative deflection (<i>left picture</i>).</p> <p><b>Notched Q:</b> Present when there is a reversal in direction <math>\geq 0.05</math> mV within the initial negative deflection (<i>right picture</i>).</p> <p><b>Q-Wave Duration:</b> Taken from the start of the global QRS complex (i.e. if there is an isoelectric segment preceding a Q-wave it contributes to the Q-wave duration (<i>left picture</i>) to the point directly above the peak of the notch in a notched Q (<i>right picture</i>) or where the tracing re-crosses the PQ baseline in a smooth Q.</p> <p><b>Q-Wave Amplitude:</b> Measured from the nadir of the negative deflection of the notch in a notched Q (<i>left picture</i>) or from the most negative deflection (<i>right picture</i>), to the PQ-segment baseline in a smooth Q.</p> <p><b>QR:</b> R-wave must be present following a Q wave.</p> <p><b>Any Q:</b> Any type of Q wave is present.</p> <p>In Leads V1-V3 for LVH:</p> <ul style="list-style-type: none"> <li>• If QR is present, a point is given.</li> <li>• If any Q wave is present a point is only given if <math>\geq 4</math> other QRS points are present in leads I, aVL, V4, V5 or V6. This is done because LVH can cause a Q wave in V1-V3 without the presence of infarction, however if signs of anterior infarct are present in other leads, then the Q wave in V1-V3 is more likely due to infarct/scar.</li> </ul> |               |
| <p><b>R-Wave:</b> The first positive deflection of the QRS complex.</p> <p><b>R-Wave Duration:</b></p> <ul style="list-style-type: none"> <li>• <u>No Q-Wave:</u> Measured from beginning of global QRS complex to the point where it re-crosses PQ-segment baseline or the end of the QRS complex (whichever comes first).</li> <li>• <u>Q-Wave Present:</u> The R-wave begins when the Q-wave returns to the PQ-segment baseline and ends when the tracing re-crosses the PQ baseline or the end of the QRS complex (whichever comes first).</li> </ul> <p><b>R-Wave Amplitude:</b> Measured from the PQ-segment baseline to the most positive deflection before it re-crosses the baseline (regardless of the presence of a notch). <i>Except RBBB, see next page.</i></p> <p>** In LAFB, lead V2: An R wave must be present to receive ANY points.</p>                                                                                                                                                                                                                                                                                                                                                                                                                                                                                                                                                                                                                                                                                                                                                                                                                                        |               |

|                                                                                                                                                                                                                                                                                                                                                                                                                                                                                                                                                                                                                                                                                                                                                                                                                                                                                                                                                                          |                                                                        |
|--------------------------------------------------------------------------------------------------------------------------------------------------------------------------------------------------------------------------------------------------------------------------------------------------------------------------------------------------------------------------------------------------------------------------------------------------------------------------------------------------------------------------------------------------------------------------------------------------------------------------------------------------------------------------------------------------------------------------------------------------------------------------------------------------------------------------------------------------------------------------------------------------------------------------------------------------------------------------|------------------------------------------------------------------------|
| <p><b>In RBBB:</b></p> <ul style="list-style-type: none"> <li>When awarding points for large R waves in V1-V2 for posterolateral infarct, a notch (reversal in direction <math>\geq 90^\circ</math> that peaks within the first 50 ms should be considered the peak of the initial-R wave (“Init R”). The nadir of the notch should be considered the end of the initial-R wave.</li> <li>If the R wave’s initial peak occurs after the first 50ms of the global QRS complex, points are not given. This is done because the later part of the R-wave or R’ represents the depolarization of the right ventricle.</li> <li>The duration of the Initial R wave is measured from where the R wave begins to either the nadir of the notch following the initial peak or where the tracing re-crosses the PQ baseline. Initial R waves refer to the initial peak of the R wave, presence of Q waves preceding the R wave does not discount the “InitR” criteria.</li> </ul> |                                                                        |
| <p><b>S-Wave:</b> The first negative deflection after an R-wave.</p> <p><b>S-Wave Amplitude:</b> Measured from the PQ-segment baseline to the most negative part of the S wave (regardless of presence of notch).</p> <p><b>NchInit40:</b> Any reversal of direction <math>\geq 90^\circ</math> that begins within the first 40 ms of the global QRS complex yields 1 point in V4, V5 and V6 in all conduction types (except LBBB) and also 1 point in V1, V2 and V3 in LVH. Smooth R or Q waves do not satisfy “NchInit40” criteria.</p>                                                                                                                                                                                                                                                                                                                                                                                                                                |                                                                        |
| <p><b>R/Q or R/S Amplitude Ratios:</b></p> <ul style="list-style-type: none"> <li>Ratio of the R-wave amplitude to the Q- or S-wave amplitude.</li> <li>If no R wave is present, then this is considered an R/S or R/Q of 0, which receives the maximum points for the ratio criteria.</li> <li>For QRS complexes with multiple R and/or R’ waves, only the first R wave is considered for scoring. Similarly, for QRS complexes with multiple S or S’ waves, only the first S wave is considered for scoring.</li> </ul>                                                                                                                                                                                                                                                                                                                                                                                                                                                |                                                                        |
| <p><b><math>Q \leq 0.2</math> &amp; <math>S \leq 0.2</math> mV and <math>Q \leq 0.3</math> &amp; <math>S \leq 0.3</math> mV:</b></p> <ul style="list-style-type: none"> <li>Points will be awarded for this criteria only if BOTH the Q and the S amplitudes of the lead are less than or equal to 0.x mV (where x=2 for V1 posterior and x=3 for V2 posterior)</li> <li>If either the Q or S wave is absent, the wave is regarded as having an amplitude of 0.00 mV.</li> </ul>                                                                                                                                                                                                                                                                                                                                                                                                                                                                                         | <p><b><math>Q \leq 0.2</math> &amp; <math>S \leq 0.2</math> mV</b></p> |
| <p><b>QR &amp; (Q<math>\geq</math>30ms):</b></p> <ul style="list-style-type: none"> <li>Points will be awarded only if BOTH QR morphology is present AND Q-Wave duration is more than or equal to 30ms.</li> </ul>                                                                                                                                                                                                                                                                                                                                                                                                                                                                                                                                                                                                                                                                                                                                                       | <p><b>QR &amp; (Q<math>\geq</math>30ms)</b></p>                        |

## Appendix 2: Glossary for LBBB

| DEFINITION                                                                                                                                                                                                                                                                                                                                                                                                                                                                                                                                                                                                                                                                                                               | ILLUSTRATIONS |
|--------------------------------------------------------------------------------------------------------------------------------------------------------------------------------------------------------------------------------------------------------------------------------------------------------------------------------------------------------------------------------------------------------------------------------------------------------------------------------------------------------------------------------------------------------------------------------------------------------------------------------------------------------------------------------------------------------------------------|---------------|
| <p><b>Q-Wave:</b> When the first deflection of the QRS complex is negative, it is termed a “Q wave”</p> <ul style="list-style-type: none"> <li>In contrast to QRS scoring in other conduction/ hypertrophy types, notches are ignored for the purpose of defining the end of the Q wave.</li> </ul> <p><b>Q-Duration:</b> Taken from the start of the global QRS complex (i.e. if there is an isoelectric segment preceding a Q-wave it contributes to the Q-wave duration) and proceeds until the tracing re-crosses the PQ-segment baseline (regardless of the presence of a notch).</p> <p><b>Q-Amplitude:</b> Measured from PQ-baseline to the most negative deflection (regardless of the presence of a notch).</p> |               |
| <p><b>R-Wave Amplitude and Amplitude Ratios (R/Q and R/S):</b></p> <ul style="list-style-type: none"> <li>When considering absolute R-wave amplitude or R/Q or R/S amplitude ratios, the most positive point (R or R') should be considered the R wave (regardless of notch).</li> <li>The most negative point should be considered the Q or S wave amplitude (regardless of notches).</li> </ul> <p><b>R-Wave Duration:</b> R-wave duration is measured from the start of the global QRS complex to the point where it re-crosses the PQ baseline (regardless of presence of notch) or the end of the QRS complex (whichever comes first).</p>                                                                          |               |
| <p><b>NchInIt40:</b> A notch (change in direction <math>\geq 90^\circ</math>) that begins its change in direction within the initial 40 ms.</p> <ul style="list-style-type: none"> <li>A notch on the R wave, or a notch on the S wave within the first 40 ms do count as a NchInIt40.</li> <li>A smooth R or qR wave does not count as NchInIt40.</li> </ul>                                                                                                                                                                                                                                                                                                                                                            |               |
| <p><b>R/R' and S/S' Amplitude Ratios:</b></p> <ul style="list-style-type: none"> <li>These points can be obtained in V1-V2 (S/S' amplitude ratio) and V5-V6 (R/R' amplitude ratio).</li> <li>The R or S is defined as the first peak/nadir, notch or beginning of the slur.</li> <li>If no R wave is present, for this criteria treat Q wave as S wave.</li> <li>The R' or S' is defined as the second peak/nadir, notch or end of the slur.</li> <li>If there is no identifiable notch/slur, then these criteria should be ignored.</li> <li>In leads V5 and V6, both peaks/notches/slurs must be above the PQ baseline to receive R/R' points.</li> </ul>                                                              |               |
