# Supplementary material
Source: PubMed Central journal article supplement (PMC3164517)
Supplement: NIHMS309339-supplement-ECG_Set_1-_Key_with_QRS_scores.pdf [file NIHMS309339-supplement-ECG_Set_1-_Key_with_QRS_scores.pdf]

|                         |                |                               |       |                              |                 |
|-------------------------|----------------|-------------------------------|-------|------------------------------|-----------------|
| <b>Patient ID:</b>      | 01             | <b>QRS Duration:</b>          | 112ms | <b>Amplitude Adjustment:</b> | +2%             |
| <b>Age &amp; Sex:</b>   | 53 Male        | <b>QRS Axis:</b>              | +122° | <b>Duration Adjustment:</b>  | 0%              |
| <b>Conduction Type:</b> | No Confounders | <b>Right Atrial Overload:</b> | No    | <b>Total Points</b>          | 15 points (45%) |

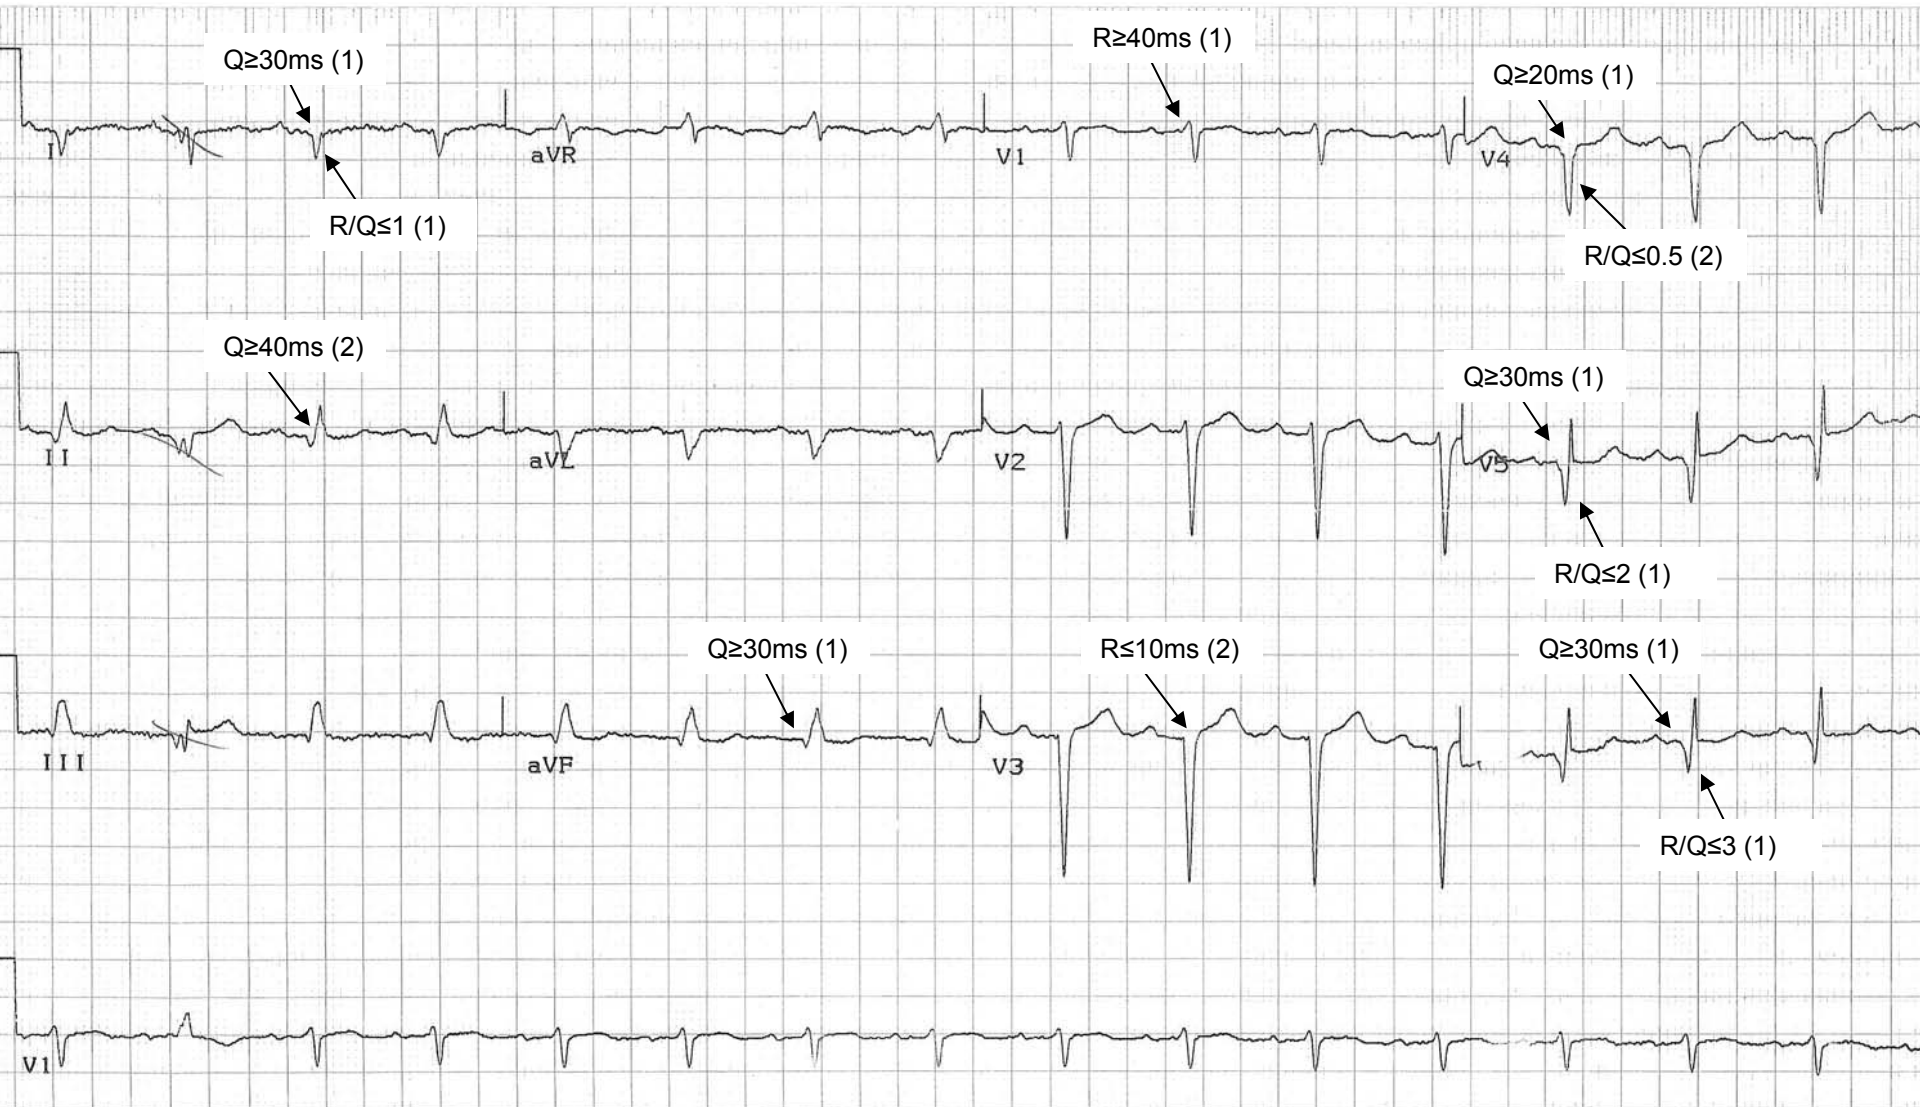

QRS scoring

Patient ID 01

QRS duration 112ms

Amplitude adjust +2%  
 (↑1%/yr age 20-54; ↓1%/yr >55 yrs; ↓ 10% for females)

Age & gender 53 Male

QRS axis +122°

Duration adjust 0% RAO(\*\*, \*\*\*) Yes  No   
 (↓ 10% for females)

| Lead      | RBBB            |     | LAFB          |     | LAFB + RBBB     |     | LVH                    |     | No Confounders |     | LBBB    |            |     |
|-----------|-----------------|-----|---------------|-----|-----------------|-----|------------------------|-----|----------------|-----|---------|------------|-----|
|           | Criteria        | Pts | Criteria      | Pts | Criteria        | Pts | Criteria               | Pts | Criteria       | Pts | Lead    | Criteria   | Pts |
| I         | Q ≥ 30 ms       | 1   | Q ≥ 30 ms     | 1   | Q ≥ 30 ms       | 1   | Q ≥ 30 ms              | 1   | Q ≥ 30 ms      | 1   | I       | any Q      | 1   |
|           | R/Q ≤ 1         | 1   | R/Q ≤ 1       | 1   | R/Q ≤ 1         | 1   | R/Q ≤ 1                | 1   | R/Q ≤ 1        | 1   |         | R/Q ≤ 1    | 2   |
| II        | R ≤ 0.2 mV      | 2   | R ≤ 0.2 mV    | 2   | R ≤ 0.2 mV      | 2   | R ≤ 0.2 mV             | 2   | R ≤ 0.2 mV     | 2   | II      | R/S ≤ 1    | 1   |
|           | Q ≥ 40 ms       | 2   | Q ≥ 40 ms     | 2   | Q ≥ 40 ms       | 2   | Q ≥ 40 ms              | 2   | Q ≥ 40 ms      | 2   |         | R/Q ≤ 15   | 1   |
| aVL       | Q ≥ 30 ms       | 1   | Q ≥ 30 ms     | 1   | Q ≥ 30 ms       | 1   | Q ≥ 30 ms              | 1   | Q ≥ 30 ms      | 1   | aVL     | R/S ≤ 15   | 1   |
|           | R/Q ≤ 1         | 1   | R/Q ≤ 1       | 1   | R/Q ≤ 1         | 1   | R/Q ≤ 1                | 1   | R/Q ≤ 1        | 1   |         | Q ≥ 40 ms  | 2   |
| aVF       | Q ≥ 40 ms       | 2   | Q ≥ 40 ms     | 2   | Q ≥ 40 ms       | 2   | Q ≥ 40 ms              | 2   | Q ≥ 40 ms      | 2   | aVF     | Q ≥ 30 ms  | 1   |
|           | Q ≥ 30 ms       | 1   | Q ≥ 30 ms     | 1   | Q ≥ 30 ms       | 1   | Q ≥ 30 ms              | 1   | Q ≥ 30 ms      | 1   |         | R/Q ≤ 0.5  | 1   |
| V1        | R/Q ≤ 1         | 2   | R/Q ≤ 1       | 2   | R/Q ≤ 1         | 2   | R/Q ≤ 1                | 2   | R/Q ≤ 1        | 2   | V1      | R/S ≤ 0.5  | 2   |
|           | R/Q ≤ 2         | 1   | R/Q ≤ 2       | 1   | R/Q ≤ 2         | 1   | R/Q ≤ 2                | 1   | R/Q ≤ 2        | 1   |         | Q ≥ 50 ms  | 2   |
| Ant.      | any Q           | 1   | any QR        | 1   | any Q           | 1   | any QR (or any Q if *) | 1   | any Q          | 1   | Ant.*** | R/Q ≤ 0.5  | 1   |
|           | Init R ≤ 20 ms  | 2   |               |     |                 |     | NtchInit40             |     |                |     |         | R/S ≤ 1    | 1   |
| V1 Post.* | Init R ≥ 60 ms  | 2   | R/S ≥ 1       | 1   | Init R ≥ 60 ms  | 2   | R/S ≥ 1                | 1   | R/S ≥ 1        | 1   | V1 Post | R/Q ≤ 1    | 1   |
|           | Init R ≥ 15 mV  | 2   | R ≥ 50 ms     | 2   | Init R ≥ 15 mV  | 2   | R ≥ 50 ms              | 2   | R ≥ 50 ms      | 2   |         | Q ≥ 50 ms  | 2   |
| V2        | Init R ≥ 50 ms  | 1   | R ≥ 40 ms     | 1   | Init R ≥ 50 ms  | 1   | R ≥ 40 ms              | 1   | R ≥ 40 ms      | 1   | V2      | Q ≥ 40 ms  | 1   |
|           | Init R ≥ 10 mV  | 1   | R ≥ 0.7 mV    | 1   | Init R ≥ 10 mV  | 1   | R ≥ 0.7 mV             | 1   | R ≥ 0.7 mV     | 1   |         | R/S ≥ 0.5  | 1   |
| Ant.***   | Q ≥ 50 ms       | 2   | Qs0.2&S≤0.2mV | 1   | Q ≥ 50 ms       | 2   | Qs0.2&S≤0.2 mV         | 1   | Qs0.2&S≤0.2 mV | 1   | Ant.*** | R/S ≤ 0.5  | 1   |
|           | any Q           | 1   | any QR        | 1   | any Q           | 1   | any QR (or any Q if *) | 1   | any Q          | 1   |         | NchInit40  | 1   |
| V2 Post.* | R ≤ 10 ms       | 2   | R ≤ 10 ms     | 2   | R ≤ 10 ms       | 2   | R ≤ 10 ms              | 2   | R ≤ 10 ms      | 2   | V2 Post | R ≥ 0.3 mV | 2   |
|           | R ≤ 0.1 mV      | 1   | R ≤ 0.1 mV    | 1   | R ≤ 0.1 mV      | 1   | R ≤ 0.1 mV             | 1   | R ≤ 0.1 mV     | 1   |         | R ≥ 30 ms  | 1   |
| V3        | R/S ≥ 15        | 1   | R/S ≥ 15      | 1   | R/S ≥ 15        | 1   | R/S ≥ 15               | 1   | R/S ≥ 15       | 1   | V3      | R ≥ 0.2 mV | 1   |
|           | Init R ≥ 70 ms  | 2   | R ≥ 60 ms     | 2   | Init R ≥ 70 ms  | 2   | R ≥ 60 ms              | 2   | R ≥ 60 ms      | 2   |         | R ≥ 0.4 mV | 2   |
| Ant.***   | Init R ≥ 2.5 mV | 1   | R ≥ 2 mV      | 1   | Init R ≥ 2.5 mV | 1   | R ≥ 2 mV               | 1   | R ≥ 2 mV       | 1   | Ant.*** | R ≥ 0.3 mV | 1   |
|           | Init R ≥ 50 ms  | 1   | R ≥ 50 ms     | 1   | Init R ≥ 50 ms  | 1   | R ≥ 50 ms              | 1   | R ≥ 50 ms      | 1   |         | R ≥ 20 ms  | 1   |
| V4        | Init R ≥ 2.0 mV | 1   | R ≥ 15 mV     | 1   | Init R ≥ 2.0 mV | 1   | R ≥ 15 mV              | 1   | R ≥ 15 mV      | 1   | V4      | R/S' ≥ 2.5 | 3   |
|           | Qs0.3&S≤0.3mV   | 1   | Qs0.3&S≤0.3mV | 1   | Qs0.3&S≤0.3mV   | 1   | Qs0.3&S≤0.3mV          | 1   | Qs0.3&S≤0.3mV  | 1   |         | S/S' ≥ 2.0 | 2   |
| V5        | Q ≥ 30 ms       | 2   | Q ≥ 30 ms     | 2   | Q ≥ 30 ms       | 2   | QR&(Q ≥ 30 ms)         | 2   | Q ≥ 30 ms      | 2   | V5      | S/S' ≥ 15  | 1   |
|           | R ≤ 10 ms       | 1   | R ≤ 10 ms     | 1   | R ≤ 10 ms       | 1   | NtchInit40             | 1   | R ≤ 10 ms      | 1   |         | any Q      | 1   |
| V6        | Q ≥ 20 ms       | 1   | Q ≥ 20 ms     | 1   | Q ≥ 20 ms       | 1   | any QR (or any Q if *) | 1   | Q ≥ 20 ms      | 1   | V6      | R/R' ≥ 2   | 2   |
|           | R ≤ 20 ms       | 1   | R ≤ 20 ms     | 1   | R ≤ 20 ms       | 1   | any QR (or any Q if *) | 1   | R ≤ 20 ms      | 1   |         | R/R' ≥ 1   | 1   |
| Total     | Q ≥ 20 ms       | 1   | Q ≥ 20 ms     | 1   | Q ≥ 20 ms       | 1   | Q ≥ 20 ms              | 1   | Q ≥ 20 ms      | 1   | Total   | R/S ≤ 2    | 1   |
|           | R/Q ≤ 0.5       | 2   | R/Q ≤ 0.5     | 2   | R/Q ≤ 0.5       | 2   | R/Q ≤ 0.5              | 2   | R/Q ≤ 0.5      | 2   |         | Points     | 15  |
| V1        | R/S ≤ 0.5       | 1   | R/S ≤ 0.5     | 1   | R/S ≤ 0.5       | 1   | R/S ≤ 0.5              | 1   | R/S ≤ 0.5      | 1   | V1      | R/S' ≥ 2.5 | 3   |
|           | R/Q ≤ 1         | 1   | R/Q ≤ 1       | 1   | R/Q ≤ 1         | 1   | R/Q ≤ 1                | 1   | R/Q ≤ 1        | 1   |         | Post       | 2   |
| V2        | R/S ≤ 1         | 1   | R/S ≤ 1       | 1   | R/S ≤ 1         | 1   | R/S ≤ 1                | 1   | R/S ≤ 1        | 1   | V2      | S/S' ≥ 15  | 2   |
|           | R/S ≤ 2         | 1   | R/S ≤ 2       | 1   | R/S ≤ 2         | 1   | R/S ≤ 2                | 1   | R/S ≤ 2        | 1   |         | S/S' ≥ 125 | 1   |
| V3        | R/S ≤ 1         | 1   | R/S ≤ 1       | 1   | R/S ≤ 1         | 1   | R/S ≤ 1                | 1   | R/S ≤ 1        | 1   | V3      | NchInit40  | 1   |
|           | R/S ≤ 2         | 1   | R/S ≤ 2       | 1   | R/S ≤ 2         | 1   | R/S ≤ 2                | 1   | R/S ≤ 2        | 1   |         | Ant.***    | 2   |
| V4        | R/S ≤ 1         | 1   | R/S ≤ 1       | 1   | R/S ≤ 1         | 1   | R/S ≤ 1                | 1   | R/S ≤ 1        | 1   | V4      | R ≥ 30 ms  | 1   |
|           | R/S ≤ 2         | 1   | R/S ≤ 2       | 1   | R/S ≤ 2         | 1   | R/S ≤ 2                | 1   | R/S ≤ 2        | 1   |         | R ≥ 0.4 mV | 2   |
| V5        | R/S ≤ 1         | 1   | R/S ≤ 1       | 1   | R/S ≤ 1         | 1   | R/S ≤ 1                | 1   | R/S ≤ 1        | 1   | V5      | R ≥ 0.3 mV | 1   |
|           | R/S ≤ 2         | 1   | R/S ≤ 2       | 1   | R/S ≤ 2         | 1   | R/S ≤ 2                | 1   | R/S ≤ 2        | 1   |         | R ≥ 20 ms  | 1   |
| V6        | R/S ≤ 1         | 1   | R/S ≤ 1       | 1   | R/S ≤ 1         | 1   | R/S ≤ 1                | 1   | R/S ≤ 1        | 1   | V6      | R/S' ≥ 2.5 | 3   |
|           | R/S ≤ 2         | 1   | R/S ≤ 2       | 1   | R/S ≤ 2         | 1   | R/S ≤ 2                | 1   | R/S ≤ 2        | 1   |         | Post       | 2   |
| Total     | R/S ≤ 1         | 1   | R/S ≤ 1       | 1   | R/S ≤ 1         | 1   | R/S ≤ 1                | 1   | R/S ≤ 1        | 1   | Total   | S/S' ≥ 15  | 1   |
|           | R/S ≤ 2         | 1   | R/S ≤ 2       | 1   | R/S ≤ 2         | 1   | R/S ≤ 2                | 1   | R/S ≤ 2        | 1   |         | Points     | 15  |

%LV infarct (3 \* #pts) \_\_\_\_\_

%LV infarct (3 x #pts) \_\_\_\_\_ %LV infarct (3 x #pts) \_\_\_\_\_ %LV infarct (3 x #pts) \_\_\_\_\_ %LV infarct (3 x #pts) \_\_\_\_\_ %LV infarct (3 x #pts) \_\_\_\_\_ **45**

\* (for LVH) if ≥ 4 other points in leads I, aVL, V4, V5 or V6 then count QS in V1+V3

\*\* (RAO) if P positive amp in V1 ≥ 0.1 mV or aVF P ≥ 0.175 mV, then exclude V1+V2 Post criteria

\*\*\* (RAO) if P positive amp in V1 ≥ 0.1 mV or aVF P ≥ 0.175 mV, then exclude V1+V2 R-criteria points

|                         |             |                               |       |                              |                |
|-------------------------|-------------|-------------------------------|-------|------------------------------|----------------|
| <b>Patient ID:</b>      | 02          | <b>QRS Duration:</b>          | 166ms | <b>Amplitude Adjustment:</b> | +3%            |
| <b>Age &amp; Sex:</b>   | 42 Female   | <b>QRS Axis:</b>              | -74°  | <b>Duration Adjustment:</b>  | -10%           |
| <b>Conduction Type:</b> | LAFB + RBBB | <b>Right Atrial Overload:</b> | No    | <b>Total Points</b>          | 6 points (18%) |

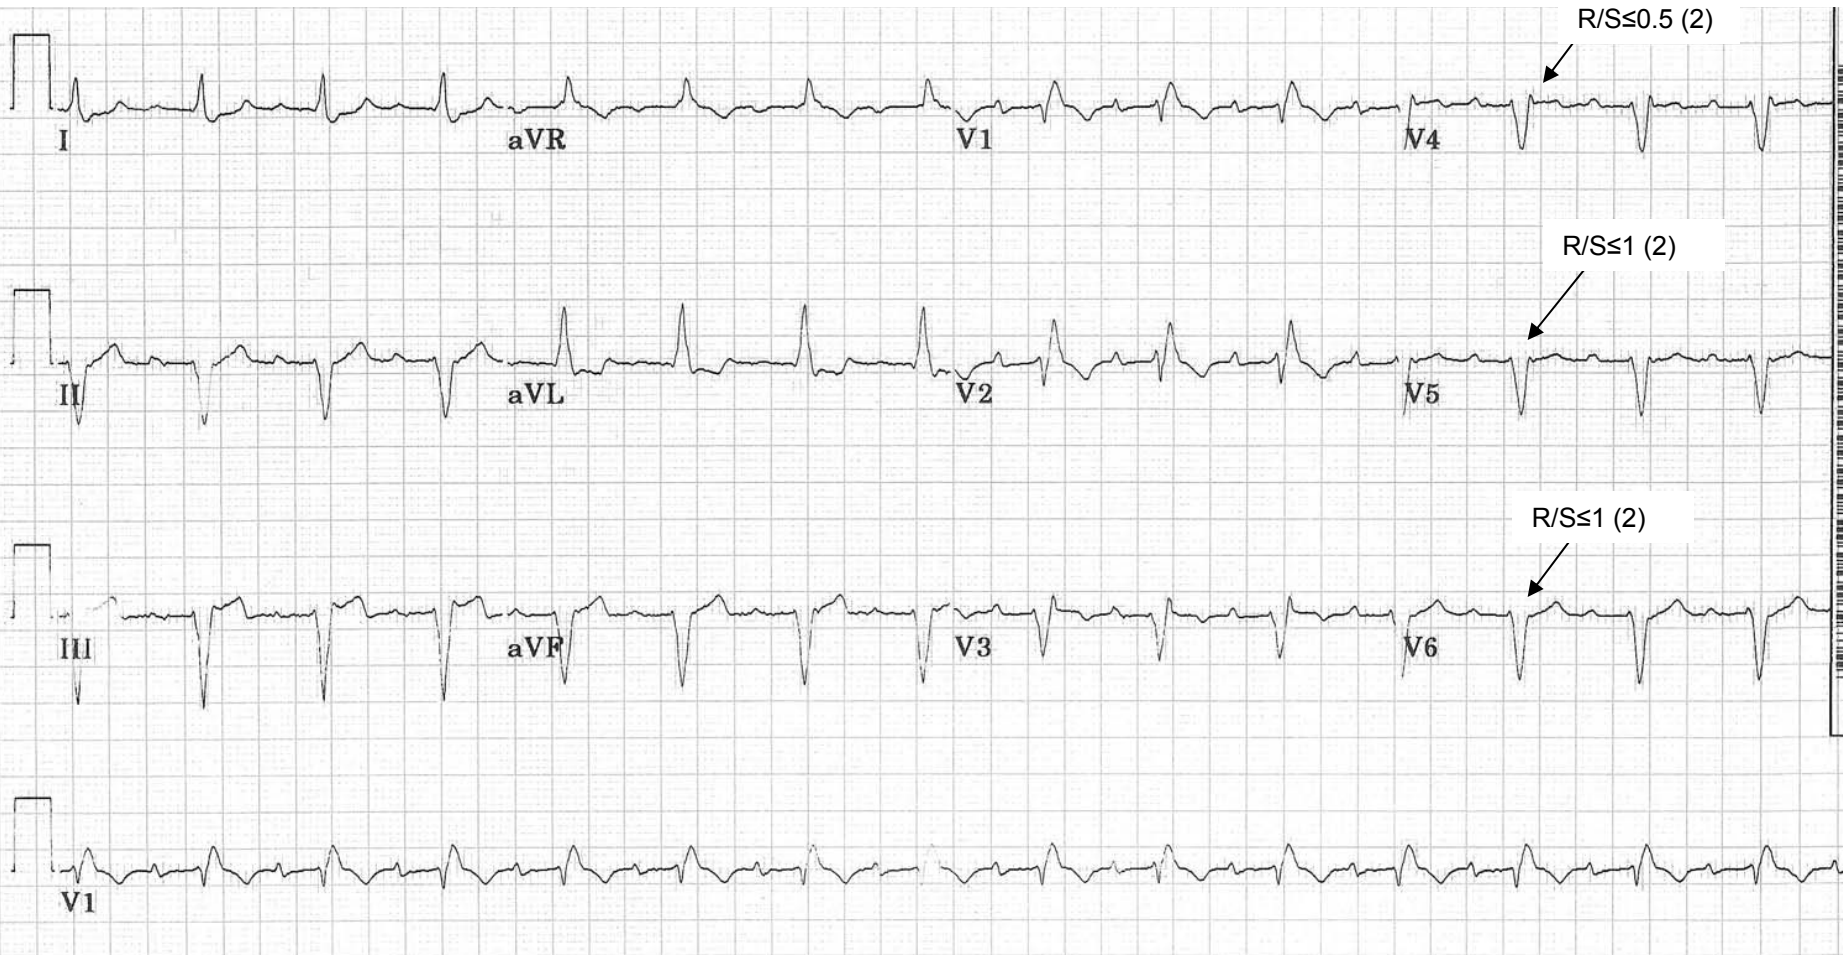

Patient ID 02

QRS duration 166ms

Amplitude adjust +3%

(↑1%/yr age 20-54; ↓1%/yr >55 yrs; ↓ 10% for females)

Age & gender 42 Female

QRS axis -74°

Duration adjust -10%

RAO(\*\*, \*\*\*)Yes **(No)**

(↓ 10% for females)

| Lead         | RBBB                                                                                  |     | LAFB                                                                              |     | LAFB + RBBB                                                                       |          | LVH                                                                                   |     | No Confounders                                                                        |     |
|--------------|---------------------------------------------------------------------------------------|-----|-----------------------------------------------------------------------------------|-----|-----------------------------------------------------------------------------------|----------|---------------------------------------------------------------------------------------|-----|---------------------------------------------------------------------------------------|-----|
|              | Criteria                                                                              | Pts | Criteria                                                                          | Pts | Criteria                                                                          | Pts      | Criteria                                                                              | Pts | Criteria                                                                              | Pts |
| I            | Q ≥ 30 ms<br>R/Q ≤ 1<br>R ≤ 0.2 mV                                                    | 1   | Q ≥ 30 ms<br>R/Q ≤ 1<br>R ≤ 0.2 mV                                                | 1   | Q ≥ 30 ms<br>R/Q ≤ 1<br>R ≤ 0.2 mV                                                | 1        | Q ≥ 30 ms<br>R/Q ≤ 1<br>R ≤ 0.2 mV                                                    | 1   | Q ≥ 30 ms<br>R/Q ≤ 1<br>R ≤ 0.2 mV                                                    | 1   |
| II           | Q ≥ 40 ms<br>Q ≥ 30 ms                                                                | 2   | Q ≥ 40 ms<br>Q ≥ 30 ms                                                            | 2   | Q ≥ 40 ms<br>Q ≥ 30 ms                                                            | 2        | Q ≥ 40 ms<br>Q ≥ 30 ms                                                                | 2   | Q ≥ 40 ms<br>Q ≥ 30 ms                                                                | 2   |
| aVL          | Q ≥ 30 ms<br>R/Q ≤ 1                                                                  | 1   | Q ≥ 40 ms<br>R/Q ≤ 1                                                              | 1   | Q ≥ 40 ms<br>R/Q ≤ 1                                                              | 1        | Q ≥ 40 ms<br>R/Q ≤ 1                                                                  | 1   | Q ≥ 30 ms<br>R/Q ≤ 1                                                                  | 1   |
| aVF          | Q ≥ 50 ms<br>Q ≥ 40 ms<br>Q ≥ 30 ms<br>R/Q ≤ 1<br>R/Q ≤ 2                             | 3   | Q ≥ 50 ms<br>Q ≥ 40 ms<br>Q ≥ 30 ms<br>R/Q ≤ 1<br>R/Q ≤ 2                         | 3   | Q ≥ 50 ms<br>Q ≥ 40 ms<br>Q ≥ 30 ms<br>R/Q ≤ 1<br>R/Q ≤ 2                         | 3        | Q ≥ 50 ms<br>Q ≥ 40 ms<br>Q ≥ 30 ms<br>R/Q ≤ 1<br>R/Q ≤ 2                             | 3   | Q ≥ 50 ms<br>Q ≥ 40 ms<br>Q ≥ 30 ms<br>R/Q ≤ 1<br>R/Q ≤ 2                             | 3   |
| V1 Ant.      | Q ≥ 50 ms<br>any Q<br>Init R ≤ 20 ms                                                  | 2   | any QR<br>any QR                                                                  | 1   | any QR<br>any QR                                                                  | 1        | any QR<br>any QR<br>Ntchlnit40                                                        | 1   | any Q<br>any Q                                                                        | 1   |
| V1 Post.*    | Init R ≥ 60 ms<br>Init R ≥ 15 mV<br>Init R ≥ 50 ms<br>Init R ≥ 10 mV                  | 2   | R/S ≥ 1<br>R ≥ 50 ms<br>R ≥ 1mV<br>R ≥ 40 ms<br>R ≥ 0.7 mV                        | 2   | Init R ≥ 60 ms<br>Init R ≥ 15 mV<br>Init R ≥ 50 ms<br>Init R ≥ 10 mV              | 2        | R/S ≥ 1<br>R ≥ 50 ms<br>R ≥ 1mV<br>R ≥ 40 ms<br>R ≥ 0.7 mV                            | 2   | R/S ≥ 1<br>R ≥ 50 ms<br>R ≥ 1mV<br>R ≥ 40 ms<br>R ≥ 0.7 mV                            | 2   |
| V2 Ant.      | Q ≥ 50 ms<br>any Q<br>R ≤ 10 ms<br>R ≤ 0.1mV                                          | 2   | any QR<br>any QR<br>R ≤ 10 ms<br>R ≤ 0.1mV                                        | 1   | Q ≥ 50 ms<br>any Q<br>R ≤ 10 ms<br>R ≤ 0.1mV                                      | 2        | any QR<br>any QR<br>R ≤ 10 ms<br>R ≤ 0.1mV                                            | 1   | any Q<br>any Q<br>R ≤ 10 ms<br>R ≤ 0.1mV                                              | 1   |
| V2 Post.*    | Init R ≥ 70 ms<br>Init R ≥ 2.5 mV<br>Init R ≥ 50 ms<br>Init R ≥ 2.0 mV                | 2   | R/S ≥ 15<br>R ≥ 60 ms<br>R ≥ 2 mV<br>R ≥ 50 ms<br>R ≥ 15 mV<br>Qs0.3&Ss0.3mV      | 1   | Init R ≥ 70 ms<br>Init R ≥ 2.5 mV<br>Init R ≥ 50 ms<br>Init R ≥ 2.0 mV            | 2        | R/S ≥ 15<br>R ≥ 60 ms<br>R ≥ 2 mV<br>R ≥ 50 ms<br>R ≥ 15 mV<br>Qs0.3&Ss0.3mV          | 1   | R/S ≥ 15<br>R ≥ 60 ms<br>R ≥ 2 mV<br>R ≥ 50 ms<br>R ≥ 15 mV<br>Qs0.3&Ss0.3mV          | 1   |
| V3           | Q ≥ 30 ms<br>R ≤ 10 ms<br>Q ≥ 20 ms<br>R ≤ 20 ms                                      | 2   | Q ≥ 30 ms<br>R ≤ 10 ms<br>Q ≥ 20 ms<br>R ≤ 20 ms                                  | 2   | Q ≥ 30 ms<br>R ≤ 10 ms<br>Q ≥ 20 ms<br>R ≤ 20 ms                                  | 2        | QR&(Q ≥ 30 ms)<br>Ntchlnit40<br>any QR<br>(or any Q if *)                             | 2   | Q ≥ 30 ms<br>R ≤ 10 ms<br>Q ≥ 20 ms<br>R ≤ 20 ms                                      | 2   |
| V4           | Q ≥ 20 ms<br>R/Q ≤ 0.5<br>R/S ≤ 0.5<br>R/Q ≤ 1<br>R/S ≤ 1<br>R ≤ 0.5 mV<br>Ntchlnit40 | 2   | R/Q ≤ 0.5<br>R/S ≤ 0.5<br>R/Q ≤ 1<br>R/S ≤ 1<br>R ≤ 0.5 mV<br>Ntchlnit40          | 2   | R/Q ≤ 0.5<br>R/S ≤ 0.5<br>R/Q ≤ 1<br>R/S ≤ 1<br>R ≤ 0.5 mV<br>Ntchlnit40          | 2        | Q ≥ 20 ms<br>R/Q ≤ 0.5<br>R/S ≤ 0.5<br>R/Q ≤ 1<br>R/S ≤ 1<br>R ≤ 0.5 mV<br>Ntchlnit40 | 2   | Q ≥ 20 ms<br>R/Q ≤ 0.5<br>R/S ≤ 0.5<br>R/Q ≤ 1<br>R/S ≤ 1<br>R ≤ 0.5 mV<br>Ntchlnit40 | 2   |
| V5           | Q ≥ 30 ms<br>R/Q ≤ 1<br>R/S ≤ 1<br>R/Q ≤ 2<br>R/S ≤ 2<br>R ≤ 0.6 mV<br>Ntchlnit40     | 1   | Q ≥ 30 ms<br>R/Q ≤ 1<br>R/S ≤ 1<br>R/Q ≤ 2<br>R/S ≤ 2<br>R ≤ 0.6 mV<br>Ntchlnit40 | 1   | Q ≥ 30 ms<br>R/Q ≤ 1<br>R/S ≤ 1<br>R/Q ≤ 2<br>R/S ≤ 2<br>R ≤ 0.6 mV<br>Ntchlnit40 | 1        | Q ≥ 30 ms<br>R/Q ≤ 1<br>R/S ≤ 1<br>R/Q ≤ 2<br>R/S ≤ 2<br>R ≤ 0.6 mV<br>Ntchlnit40     | 1   | Q ≥ 30 ms<br>R/Q ≤ 1<br>R/S ≤ 1<br>R/Q ≤ 2<br>R/S ≤ 2<br>R ≤ 0.6 mV<br>Ntchlnit40     | 1   |
| V6           | Q ≥ 30 ms<br>R/Q ≤ 1<br>R/S ≤ 1<br>R/Q ≤ 3<br>R/S ≤ 3<br>R ≤ 0.6 mV<br>Ntchlnit40     | 1   | Q ≥ 30 ms<br>R/Q ≤ 1<br>R/S ≤ 1<br>R/Q ≤ 3<br>R/S ≤ 3<br>R ≤ 0.6 mV<br>Ntchlnit40 | 1   | Q ≥ 30 ms<br>R/Q ≤ 1<br>R/S ≤ 1<br>R/Q ≤ 3<br>R/S ≤ 3<br>R ≤ 0.6 mV<br>Ntchlnit40 | 1        | Q ≥ 30 ms<br>R/Q ≤ 1<br>R/S ≤ 1<br>R/Q ≤ 3<br>R/S ≤ 3<br>R ≤ 0.6 mV<br>Ntchlnit40     | 1   | Q ≥ 30 ms<br>R/Q ≤ 1<br>R/S ≤ 1<br>R/Q ≤ 3<br>R/S ≤ 3<br>R ≤ 0.6 mV<br>Ntchlnit40     | 1   |
| <b>Total</b> | Points                                                                                |     | Points                                                                            |     | Points                                                                            | <b>6</b> | Points                                                                                |     | Points                                                                                |     |

| Lead         | Criteria                                                        | Pts |
|--------------|-----------------------------------------------------------------|-----|
| I            | any Q<br>R/Q ≤ 1<br>R/S ≤ 1<br>R/Q ≤ 15<br>R/S ≤ 15             | 2   |
| II           | Q ≥ 40 ms<br>Q ≥ 30 ms                                          | 2   |
| aVL          | Q ≥ 50 ms<br>Q ≥ 40 ms<br>R/S ≤ 0.5<br>R/S ≤ 0.5                | 2   |
| aVF          | Q ≥ 50 ms<br>Q ≥ 40 ms<br>R/S ≤ 0.5<br>R/S ≤ 0.5                | 2   |
| V1 Ant.***   | Nchlnit40<br>R ≥ 0.3 mV<br>R ≥ 30 ms<br>R ≥ 0.2 mV<br>R ≥ 20 ms | 2   |
| V1 Post      | S/S' ≥ 2.0<br>S/S' ≥ 15<br>S/S' ≥ 125                           | 3   |
| V2 Ant.***   | Nchlnit40<br>R ≥ 0.4 mV<br>R ≥ 30 ms<br>R ≥ 0.3 mV<br>R ≥ 20 ms | 2   |
| V2 Post      | S/S' ≥ 2.5<br>S/S' ≥ 2.0<br>S/S' ≥ 15                           | 3   |
| V5           | any Q<br>R/R' ≥ 2<br>R/R' ≥ 1<br>R/S ≤ 2<br>R ≤ 0.5 mV          | 1   |
| V6           | Q ≥ 20 ms<br>R/R' ≥ 2<br>R/R' ≥ 1<br>R/S ≤ 2<br>R ≤ 0.6 mV      | 1   |
| <b>Total</b> | Points                                                          |     |

%LV infarct (3 \* #pts) \_\_\_\_\_

%LV infarct (3 x #pts) \_\_\_\_\_

%LV infarct (3 x #pts) \_\_\_\_\_

%LV infarct (3 x #pts) **18**

%LV infarct (3 x #pts) \_\_\_\_\_

%LV infarct (3 x #pts) \_\_\_\_\_

\*(for LVH) if ≥ 4 other points in leads I, aVL, V4, V5 or V6 then count QS in V1+V3

\*\* (RAO) if P positive amp in V1 ≥ 0.1mV or aVF P ≥ 0.175 mV, then exclude V1+V2 Post criteria

\*\*\* (RAO) if P positive amp in V1 ≥ 0.1mV or aVF P ≥ 0.175 mV, then exclude V1+V2 R-criteria points

|                         |         |                               |       |                              |                 |
|-------------------------|---------|-------------------------------|-------|------------------------------|-----------------|
| <b>Patient ID:</b>      | 03      | <b>QRS Duration:</b>          | 118ms | <b>Amplitude Adjustment:</b> | +1%             |
| <b>Age &amp; Sex:</b>   | 54 Male | <b>QRS Axis:</b>              | -68°  | <b>Duration Adjustment:</b>  | 0%              |
| <b>Conduction Type:</b> | LAFB    | <b>Right Atrial Overload:</b> | Yes   | <b>Total Points</b>          | 11 points (33%) |

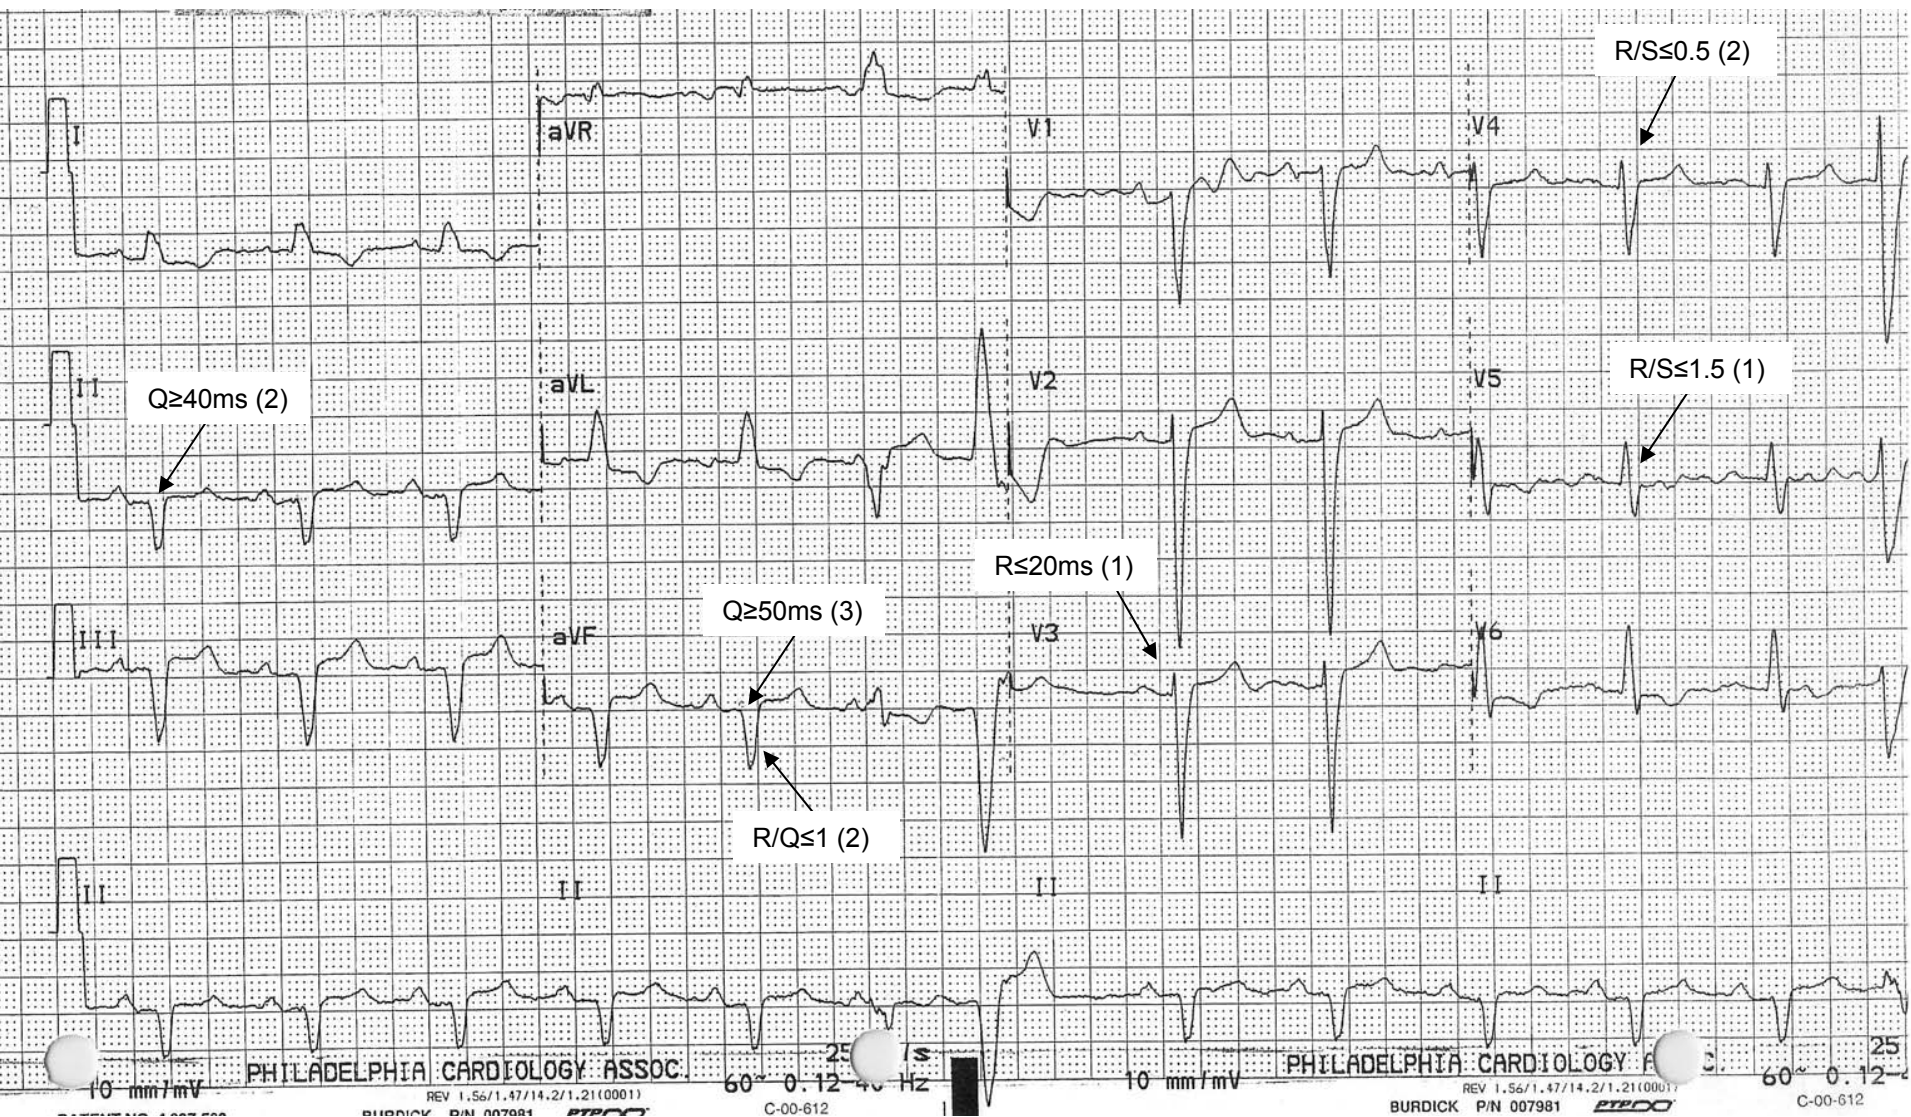

QRS Scoring

Patient ID 03 QRS duration 118ms Amplitude adjust +1%  
 (↑1%/yr age 20-54; ↓1%/yr >55 yrs; ↓ 10% for females)

Age & gender 54 Male QRS axis -68° Duration adjust 0% RAO(\*\*, \*\*\*  Yes  No)  
 (↓ 10% for females)

| Lead       | RBBB            |     | LAFB            |     | LAFB + RBBB     |     | LVH              |     | No Confounders  |     |
|------------|-----------------|-----|-----------------|-----|-----------------|-----|------------------|-----|-----------------|-----|
|            | Criteria        | Pts | Criteria        | Pts | Criteria        | Pts | Criteria         | Pts | Criteria        | Pts |
| I          | Q ≥ 30 ms       | 1   | Q ≥ 30 ms       | 1   | Q ≥ 30 ms       | 1   | Q ≥ 30 ms        | 1   | Q ≥ 30 ms       | 1   |
|            | R/Q ≤ 1         | 1   | R/Q ≤ 1         | 1   | R/Q ≤ 1         | 1   | R/Q ≤ 1          | 1   | R/Q ≤ 1         | 1   |
|            | R ≤ 0.2 mV      | 1   | R ≤ 0.2 mV      | 1   | R ≤ 0.2 mV      | 1   | R ≤ 0.2 mV       | 1   | R ≤ 0.2 mV      | 1   |
| II         | Q ≥ 40 ms       | 2   | Q ≥ 40 ms       | 2   | Q ≥ 40 ms       | 2   | Q ≥ 40 ms        | 2   | Q ≥ 40 ms       | 2   |
|            | Q ≥ 30 ms       | 1   | Q ≥ 30 ms       | 1   | Q ≥ 30 ms       | 1   | Q ≥ 30 ms        | 1   | Q ≥ 30 ms       | 1   |
|            | R/Q ≤ 1         | 1   | R/Q ≤ 1         | 1   | R/Q ≤ 1         | 1   | R/Q ≤ 1          | 1   | R/Q ≤ 1         | 1   |
| aVL        | Q ≥ 30 ms       | 1   | Q ≥ 40 ms       | 1   | Q ≥ 40 ms       | 1   | Q ≥ 40 ms        | 1   | Q ≥ 30 ms       | 1   |
|            | R/Q ≤ 1         | 1   | R/Q ≤ 1         | 1   | R/Q ≤ 1         | 1   | R/Q ≤ 1          | 1   | R/Q ≤ 1         | 1   |
|            | R/S ≤ 1         | 1   | R/S ≤ 1         | 1   | R/S ≤ 1         | 1   | R/S ≤ 1          | 1   | R/S ≤ 1         | 1   |
| aVF        | Q ≥ 50 ms       | 3   | Q ≥ 50 ms       | 3   | Q ≥ 50 ms       | 3   | Q ≥ 60 ms        | 3   | Q ≥ 50 ms       | 3   |
|            | Q ≥ 40 ms       | 2   | Q ≥ 40 ms       | 2   | Q ≥ 40 ms       | 2   | Q ≥ 50 ms        | 2   | Q ≥ 40 ms       | 2   |
|            | Q ≥ 30 ms       | 1   | Q ≥ 30 ms       | 1   | Q ≥ 30 ms       | 1   | Q ≥ 40 ms        | 1   | Q ≥ 30 ms       | 1   |
| V1         | R/Q ≤ 1         | 2   | R/Q ≤ 1         | 2   | R/Q ≤ 1         | 2   | R/Q ≤ 1          | 2   | R/Q ≤ 1         | 2   |
|            | R/Q ≤ 2         | 1   | R/Q ≤ 2         | 1   | R/Q ≤ 2         | 1   | R/Q ≤ 2          | 1   | R/Q ≤ 2         | 1   |
|            | Q ≥ 50 ms       | 2   | Q ≥ 50 ms       | 2   | Q ≥ 50 ms       | 2   | any QR           | 1   | any QR          | 1   |
| Ant.       | any Q           | 1   | any QR          | 1   | any Q           | 1   | (or any Q if *)  | 1   | any Q           | 1   |
|            | Init R ≤ 2.0 mV | 1   | Init R ≤ 2.0 mV | 1   | Init R ≤ 2.0 mV | 1   | NtchInit40       | 1   | Init R ≤ 2.0 mV | 1   |
|            | R/S ≥ 1         | 1   | R/S ≥ 1         | 1   | R/S ≥ 1         | 1   | R/S ≥ 1          | 1   | R/S ≥ 1         | 1   |
| V1 Post.*  | Init R ≥ 60 ms  | 2   | Init R ≥ 60 ms  | 2   | Init R ≥ 60 ms  | 2   | Init R ≥ 60 ms   | 2   | Init R ≥ 60 ms  | 2   |
|            | Init R ≥ 15 mV  | 1   | Init R ≥ 15 mV  | 1   | Init R ≥ 15 mV  | 1   | Init R ≥ 15 mV   | 1   | Init R ≥ 15 mV  | 1   |
|            | Init R ≥ 10 mV  | 1   | Init R ≥ 10 mV  | 1   | Init R ≥ 10 mV  | 1   | Init R ≥ 10 mV   | 1   | Init R ≥ 10 mV  | 1   |
| V2         | Q ≥ 50 ms       | 2   | Q ≥ 50 ms       | 2   | Q ≥ 50 ms       | 2   | Q ≥ 50 ms        | 2   | Q ≥ 50 ms       | 2   |
|            | any Q           | 1   | any QR          | 1   | any Q           | 1   | any QR           | 1   | any Q           | 1   |
|            | R ≤ 10 ms       | 1   | R ≤ 10 ms       | 1   | R ≤ 10 ms       | 1   | (or any Q if *)  | 1   | R ≤ 10 ms       | 1   |
| V2 Post.** | Init R ≥ 70 ms  | 2   | Init R ≥ 70 ms  | 2   | Init R ≥ 70 ms  | 2   | Init R ≥ 70 ms   | 2   | Init R ≥ 70 ms  | 2   |
|            | Init R ≥ 2.5 mV | 1   | Init R ≥ 2.5 mV | 1   | Init R ≥ 2.5 mV | 1   | Init R ≥ 2.5 mV  | 1   | Init R ≥ 2.5 mV | 1   |
|            | Init R ≥ 2.0 mV | 1   | Init R ≥ 2.0 mV | 1   | Init R ≥ 2.0 mV | 1   | Init R ≥ 2.0 mV  | 1   | Init R ≥ 2.0 mV | 1   |
| V3         | Q ≥ 30 ms       | 2   | Q ≥ 30 ms       | 2   | Q ≥ 30 ms       | 2   | Q ≥ 30 ms        | 2   | Q ≥ 30 ms       | 2   |
|            | R ≤ 10 ms       | 1   | R ≤ 10 ms       | 1   | R ≤ 10 ms       | 1   | OR & (Q ≥ 30 ms) | 2   | R ≤ 10 ms       | 1   |
|            | Q ≥ 20 ms       | 1   | Q ≥ 20 ms       | 1   | Q ≥ 20 ms       | 1   | NtchInit40       | 1   | Q ≥ 20 ms       | 1   |
| V4         | R ≤ 20 ms       | 1   | R ≤ 20 ms       | 1   | R ≤ 20 ms       | 1   | (or any Q if *)  | 1   | R ≤ 20 ms       | 1   |
|            | Q ≥ 20 ms       | 1   | Q ≥ 20 ms       | 1   | Q ≥ 20 ms       | 1   | Q ≥ 20 ms        | 1   | Q ≥ 20 ms       | 1   |
|            | R/Q ≤ 0.5       | 2   | R/Q ≤ 0.5       | 2   | R/Q ≤ 0.5       | 2   | R/Q ≤ 0.5        | 2   | R/Q ≤ 0.5       | 2   |
| V5         | R/S ≤ 0.5       | 1   | R/S ≤ 0.5       | 1   | R/S ≤ 0.5       | 1   | R/S ≤ 0.5        | 1   | R/S ≤ 0.5       | 1   |
|            | R/Q ≤ 1         | 1   | R/Q ≤ 1         | 1   | R/Q ≤ 1         | 1   | R/Q ≤ 1          | 1   | R/Q ≤ 1         | 1   |
|            | R/S ≤ 1         | 1   | R/S ≤ 1         | 1   | R/S ≤ 1         | 1   | R/S ≤ 1          | 1   | R/S ≤ 1         | 1   |
| V6         | R ≤ 0.5 mV      | 1   | R ≤ 0.5 mV      | 1   | R ≤ 0.5 mV      | 1   | R ≤ 0.5 mV       | 1   | R ≤ 0.5 mV      | 1   |
|            | NtchInit40      | 1   | NtchInit40      | 1   | NtchInit40      | 1   | NtchInit40       | 1   | NtchInit40      | 1   |
|            | Q ≥ 30 ms       | 1   | Q ≥ 30 ms       | 1   | Q ≥ 30 ms       | 1   | Q ≥ 30 ms        | 1   | Q ≥ 30 ms       | 1   |
| Total      | Points          |     | Points          | 11  | Points          |     | Points           |     | Points          |     |

| Lead       | LBBB       |     |
|------------|------------|-----|
|            | Criteria   | Pts |
| I          | any Q      | 1   |
|            | R/Q ≤ 1    | 2   |
|            | R/S ≤ 1    | 1   |
| II         | R/Q ≤ 15   | 1   |
|            | R/S ≤ 15   | 1   |
|            | Q ≥ 40 ms  | 2   |
| aVL        | Q ≥ 30 ms  | 1   |
|            | R/Q ≤ 0.5  | 1   |
|            | R/S ≤ 0.5  | 1   |
| aVF        | Q ≥ 50 ms  | 2   |
|            | Q ≥ 40 ms  | 1   |
|            | R/Q ≤ 0.5  | 1   |
| V1         | R/S ≤ 0.5  | 2   |
|            | R/Q ≤ 0.5  | 1   |
|            | R/S ≤ 1    | 1   |
| aVF        | R/S ≤ 1    | 1   |
|            | R/Q ≤ 1    | 1   |
|            | Q ≥ 50 ms  | 2   |
| V1 Ant.*** | Q ≥ 30 ms  | 2   |
|            | R ≥ 30 ms  | 1   |
|            | R ≥ 0.2 mV | 1   |
| V1 Post    | R ≥ 20 ms  | 1   |
|            | S/S' ≥ 2.0 | 3   |
|            | S/S' ≥ 1.5 | 2   |
| V2 Ant.*** | S/S' ≥ 125 | 1   |
|            | NtchInit40 | 1   |
|            | R ≥ 0.4 mV | 2   |
| V2 Post    | R ≥ 30 ms  | 1   |
|            | R ≥ 0.3 mV | 1   |
|            | R ≥ 20 ms  | 1   |
| V5         | S/S' ≥ 2.5 | 3   |
|            | S/S' ≥ 2.0 | 2   |
|            | S/S' ≥ 1.5 | 1   |
| V6         | any Q      | 1   |
|            | R/R' ≥ 2   | 2   |
|            | R/R' ≥ 1   | 1   |
| Total      | R/S ≤ 2    | 1   |
|            | R ≤ 0.5 mV | 1   |
|            | Points     |     |

%LV infarct       
 (3 \* #pts)

%LV infarct      %LV infarct 33 %LV infarct      %LV infarct      %LV infarct       
 (3 x #pts) (3 x #pts) (3 x #pts) (3 x #pts) (3 x #pts)

\* (for LVH) if ≥ 4 other points in leads I, aVL, V4, V5 or V6 then count QS in V1+V3  
 \*\* (RAO) if P positive amp in V1 ≥ 0.1mV or aVF P ≥ 0.175 mV, then exclude V1-V2 R-criteria points  
 \*\*\* (RAO) if P positive amp in V1 ≥ 0.1mV or aVF P ≥ 0.175 mV, then exclude V1-V2 R-criteria points

|                         |         |                               |       |                              |                |
|-------------------------|---------|-------------------------------|-------|------------------------------|----------------|
| <b>Patient ID:</b>      | 04      | <b>QRS Duration:</b>          | 112ms | <b>Amplitude Adjustment:</b> | +1%            |
| <b>Age &amp; Sex:</b>   | 54 Male | <b>QRS Axis:</b>              | -9°   | <b>Duration Adjustment:</b>  | 0%             |
| <b>Conduction Type:</b> | LVH     | <b>Right Atrial Overload:</b> | Yes   | <b>Total Points</b>          | 9 points (27%) |

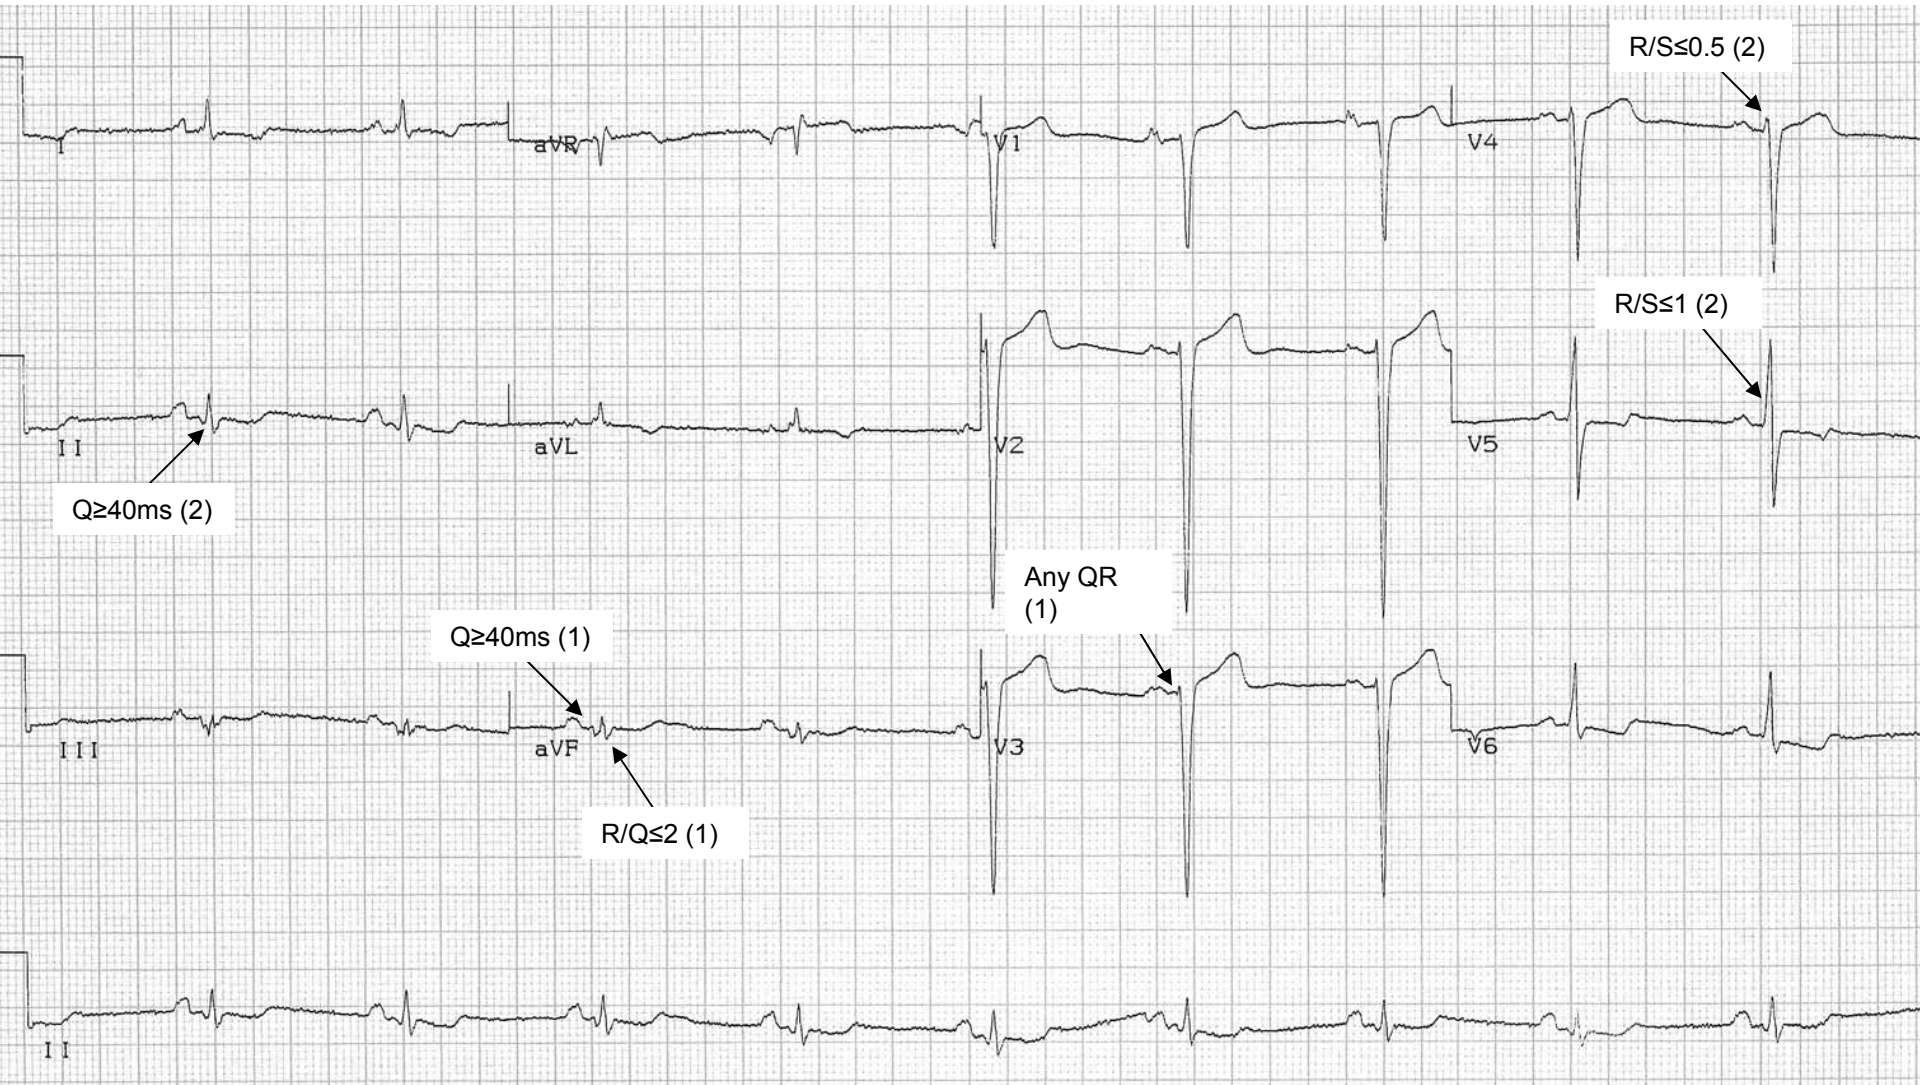

Patient ID 04

QRS duration 112ms

Amplitude adjust +1%  
(↑1%/yr age 20-54; ↓1%/yr >55 yrs; ↓ 10% for females)

Age & gender 54 Male

QRS axis -9°

Duration adjust 0% RAO(\*\*, \*\*\*Yes)No  
(↓ 10% for females)

|            | RBBB                                                                                        | LAFB                                                                                        | LAFB + RBBB                                                                                 | LVH                                                                                     | No Confounders                                                                              |
|------------|---------------------------------------------------------------------------------------------|---------------------------------------------------------------------------------------------|---------------------------------------------------------------------------------------------|-----------------------------------------------------------------------------------------|---------------------------------------------------------------------------------------------|
| Lead       | Criteria Pts                                                                                | Criteria Pts                                                                                | Criteria Pts                                                                                | Criteria Pts                                                                            | Criteria Pts                                                                                |
| I          | Q ≥ 30 ms 1<br>R/Q ≤ 1 1<br>R ≤ 0.2 mV                                                      | Q ≥ 30 ms 1<br>R/Q ≤ 1 1<br>R ≤ 0.2 mV                                                      | Q ≥ 30 ms 1<br>R/Q ≤ 1 1<br>R ≤ 0.2 mV                                                      | Q ≥ 30 ms 1<br>R/Q ≤ 1 1<br>R ≤ 0.2 mV                                                  | Q ≥ 30 ms 1<br>R/Q ≤ 1 1<br>R ≤ 0.2 mV                                                      |
| II         | Q ≥ 40 ms 2<br>Q ≥ 30 ms 1                                                                  | Q ≥ 40 ms 2<br>Q ≥ 30 ms 1                                                                  | Q ≥ 40 ms 2<br>Q ≥ 30 ms 1                                                                  | Q ≥ 40 ms 2<br>Q ≥ 30 ms 1                                                              | Q ≥ 40 ms 2<br>Q ≥ 30 ms 1                                                                  |
| aVL        | Q ≥ 30 ms 1<br>R/Q ≤ 1                                                                      | Q ≥ 40 ms 1<br>R/Q ≤ 1                                                                      | Q ≥ 40 ms 1<br>R/Q ≤ 1                                                                      | Q ≥ 40 ms 1<br>R/Q ≤ 1                                                                  | Q ≥ 30 ms 1<br>R/Q ≤ 1                                                                      |
| aVF        | Q ≥ 50 ms 3<br>Q ≥ 40 ms 2<br>Q ≥ 30 ms 1<br>R/Q ≤ 1 2<br>R/Q ≤ 2 1                         | Q ≥ 50 ms 3<br>Q ≥ 40 ms 2<br>Q ≥ 30 ms 1<br>R/Q ≤ 1 2<br>R/Q ≤ 2 1                         | Q ≥ 50 ms 3<br>Q ≥ 40 ms 2<br>Q ≥ 30 ms 1<br>R/Q ≤ 1 2<br>R/Q ≤ 2 1                         | Q ≥ 60 ms 3<br>Q ≥ 50 ms 2<br>Q ≥ 40 ms 1<br>R/Q ≤ 1 2<br>R/Q ≤ 2 1                     | Q ≥ 50 ms 3<br>Q ≥ 40 ms 2<br>Q ≥ 30 ms 1<br>R/Q ≤ 1 2<br>R/Q ≤ 2 1                         |
| V1         | Q ≥ 50 ms 2<br>any Q 1<br>Init R ≤ 20 ms                                                    | any QR 1                                                                                    | Q ≥ 50 ms 2<br>any Q 1                                                                      | any QR (or any Q if *)<br>NtchInit40                                                    | any Q 1                                                                                     |
| V1 Post.** | Init R ≥ 60 ms 2<br>Init R ≥ 15 mV 1<br>Init R ≥ 50 ms 1<br>Init R ≥ 10 mV                  | R/S ≥ 1 1<br>R ≥ 50 ms 2<br>R ≥ 1mV 1<br>R ≥ 40 ms 1<br>R ≥ 0.7 mV                          | Init R ≥ 60 ms 2<br>Init R ≥ 15 mV 1<br>Init R ≥ 50 ms 1<br>Init R ≥ 10 mV                  | <del>R/S ≥ 1 1<br/>R ≥ 50 ms 2<br/>R ≥ 1mV 1<br/>R ≥ 40 ms 1<br/>R ≥ 0.7 mV</del>       | R/S ≥ 1 1<br>R ≥ 50 ms 2<br>R ≥ 1mV 1<br>R ≥ 40 ms 1<br>R ≥ 0.7 mV                          |
| V2         | Q ≥ 50 ms 2<br>any Q 1<br>R ≤ 10 ms<br>R ≤ 0.1mV                                            | any QR 1<br>R ≤ 10 ms<br>R ≤ 0.1mV                                                          | Q ≥ 50 ms 2<br>any Q 1<br>R ≤ 10 ms<br>R ≤ 0.1mV                                            | any QR (or any Q if *)<br>NtchInit40                                                    | any Q 1<br>R ≤ 10 ms<br>R ≤ 0.1mV                                                           |
| V2 Post.** | Init R ≥ 70 ms 2<br>Init R ≥ 2.5 mV 1<br>Init R ≥ 50 ms 1<br>Init R ≥ 2.0 mV                | R/S ≥ 15 1<br>R ≥ 60 ms 2<br>R ≥ 2 mV 1<br>R ≥ 50 ms 1<br>R ≥ 15 mV                         | Init R ≥ 70 ms 2<br>Init R ≥ 2.5 mV 1<br>Init R ≥ 50 ms 1<br>Init R ≥ 2.0 mV                | <del>R/S ≥ 15 1<br/>R ≥ 60 ms 2<br/>R ≥ 2 mV 1<br/>R ≥ 50 ms 1<br/>R ≥ 15 mV</del>      | R/S ≥ 15 1<br>R ≥ 60 ms 2<br>R ≥ 2 mV 1<br>R ≥ 50 ms 1<br>R ≥ 15 mV                         |
| V3         | Q ≥ 30 ms 2<br>R ≤ 10 ms<br>Q ≥ 20 ms 1<br>R ≤ 20 ms                                        | Q ≥ 30 ms 2<br>R ≤ 10 ms<br>Q ≥ 20 ms 1<br>R ≤ 20 ms                                        | Q ≥ 30 ms 2<br>R ≤ 10 ms<br>Q ≥ 20 ms 1<br>R ≤ 20 ms                                        | QR&(Q ≥ 30 ms) 2<br>NtchInit40 1<br>any QR (or any Q if *)                              | Q ≥ 30 ms 2<br>R ≤ 10 ms<br>Q ≥ 20 ms 1<br>R ≤ 20 ms                                        |
| V4         | Q ≥ 20 ms 1<br>R/Q ≤ 0.5 2<br>R/S ≤ 0.5<br>R/Q ≤ 1 1<br>R/S ≤ 1<br>R ≤ 0.5 mV<br>NtchInit40 | Q ≥ 20 ms 1<br>R/Q ≤ 0.5 2<br>R/S ≤ 0.5<br>R/Q ≤ 1 1<br>R/S ≤ 1<br>R ≤ 0.5 mV<br>NtchInit40 | Q ≥ 20 ms 1<br>R/Q ≤ 0.5 2<br>R/S ≤ 0.5<br>R/Q ≤ 1 1<br>R/S ≤ 1<br>R ≤ 0.5 mV<br>NtchInit40 | Q ≥ 20 ms 1<br>R/Q ≤ 0.5 2<br>R/S ≤ 1 1<br>R/S ≤ 1<br>R ≤ 0.5 mV<br>NtchInit40          | Q ≥ 20 ms 1<br>R/Q ≤ 0.5 2<br>R/S ≤ 0.5<br>R/Q ≤ 1 1<br>R/S ≤ 1<br>R ≤ 0.5 mV<br>NtchInit40 |
| V5         | Q ≥ 30 ms 1<br>R/Q ≤ 1 2<br>R/S ≤ 1<br>R/Q ≤ 2 1<br>R/S ≤ 2<br>R ≤ 0.6 mV<br>NtchInit40     | Q ≥ 30 ms 1<br>R/Q ≤ 1 2<br>R/S ≤ 1<br>R/Q ≤ 2 1<br>R/S ≤ 15<br>R ≤ 0.6 mV<br>NtchInit40    | Q ≥ 30 ms 1<br>R/Q ≤ 1 2<br>R/S ≤ 1<br>R/Q ≤ 2 1<br>R/S ≤ 15<br>R ≤ 0.6 mV<br>NtchInit40    | Q ≥ 30 ms 1<br>R/Q ≤ 1 2<br>R/S ≤ 1<br>R/Q ≤ 2 1<br>R/S ≤ 2<br>R ≤ 0.6 mV<br>NtchInit40 | Q ≥ 30 ms 1<br>R/Q ≤ 1 2<br>R/S ≤ 1<br>R/Q ≤ 2 1<br>R/S ≤ 2<br>R ≤ 0.6 mV<br>NtchInit40     |
| V6         | Q ≥ 30 ms 1<br>R/Q ≤ 1 2<br>R/S ≤ 1<br>R/Q ≤ 3 1<br>R/S ≤ 3<br>R ≤ 0.6 mV<br>NtchInit40     | Q ≥ 30 ms 1<br>R/Q ≤ 1 2<br>R/S ≤ 1<br>R/Q ≤ 3 1<br>R/S ≤ 2<br>R ≤ 0.6 mV<br>NtchInit40     | Q ≥ 30 ms 1<br>R/Q ≤ 1 2<br>R/S ≤ 1<br>R/Q ≤ 3 1<br>R/S ≤ 2<br>R ≤ 0.6 mV<br>NtchInit40     | Q ≥ 30 ms 1<br>R/Q ≤ 1 2<br>R/S ≤ 1<br>R/Q ≤ 3 1<br>R/S ≤ 3<br>R ≤ 0.6 mV<br>NtchInit40 | Q ≥ 30 ms 1<br>R/Q ≤ 1 2<br>R/S ≤ 1<br>R/Q ≤ 3 1<br>R/S ≤ 3<br>R ≤ 0.6 mV<br>NtchInit40     |
| Total      | Points                                                                                      | Points                                                                                      | Points                                                                                      | Points 9                                                                                | Points                                                                                      |

| Lead       | Criteria   | Pts |
|------------|------------|-----|
| I          | any Q      | 1   |
|            | R/Q ≤ 1    | 2   |
| II         | R/S ≤ 1    | 1   |
|            | R/Q ≤ 15   | 1   |
| aVL        | Q ≥ 40 ms  | 2   |
|            | Q ≥ 30 ms  | 1   |
| aVF        | R/Q ≤ 0.5  | 1   |
|            | R/S ≤ 0.5  | 1   |
| V1         | Q ≥ 50 ms  | 2   |
|            | Q ≥ 40 ms  | 1   |
| V1 Ant.*** | R/Q ≤ 0.5  | 1   |
|            | R/S ≤ 1    | 1   |
| V1 Post    | Q ≥ 50 ms  | 2   |
|            | Q ≥ 40 ms  | 1   |
| V2         | R/Q ≤ 0.5  | 1   |
|            | R/S ≤ 0.5  | 1   |
| V2 Ant.*** | NtchInit40 | 1   |
|            | R ≥ 0.3 mV | 2   |
| V3         | R ≥ 30 ms  | 1   |
|            | R ≥ 0.2 mV | 1   |
| V3 Ant.*** | R ≥ 0.3 mV | 2   |
|            | R ≥ 30 ms  | 1   |
| V4         | R ≥ 20 ms  | 1   |
|            | R ≥ 0.2 mV | 1   |
| V4 Ant.*** | R ≥ 0.2 mV | 1   |
|            | R ≥ 20 ms  | 1   |
| V5         | S/S' ≥ 2.0 | 3   |
|            | S/S' ≥ 15  | 2   |
| V5 Ant.*** | S/S' ≥ 125 | 1   |
|            | NtchInit40 | 1   |
| V6         | R ≥ 0.4 mV | 2   |
|            | R ≥ 30 ms  | 1   |
| V6 Ant.*** | R ≥ 0.3 mV | 1   |
|            | R ≥ 20 ms  | 1   |
| V7         | S/S' ≥ 2.5 | 3   |
|            | S/S' ≥ 2.0 | 2   |
| V7 Ant.*** | S/S' ≥ 15  | 1   |
|            | any Q      | 1   |
| V8         | R/R' ≥ 2   | 2   |
|            | R/R' ≥ 1   | 1   |
| V8 Ant.*** | R/S ≤ 2    | 1   |
|            | R ≤ 0.5 mV | 1   |
| V9         | Q ≥ 20 ms  | 1   |
|            | R/R' ≥ 2   | 2   |
| V9 Ant.*** | R/R' ≥ 1   | 1   |
|            | R/S ≤ 2    | 1   |
| Total      | Points     |     |

%LV infarct         
(3 \* #pts)

%LV infarct        %LV infarct        %LV infarct        %LV infarct 27 %LV infarct         
(3 x #pts) (3 x #pts) (3 x #pts) (3 x #pts) (3 x #pts)

\* (for LVH) if ≥4 other points in leads I, aVL, V4, V5 or V6 then count QS in V1+V3

\*\* (RAO) if P positive amp in V1 ≥ 0.1mV or aVF P ≥ 0.175 mV, then exclude V1-V2 Post criteria

\*\*\* (RAO) if P positive amp in V1 ≥ 0.1mV or aVF P ≥ 0.175 mV, then exclude V1-V2 R-criteria points



|                         |           |                               |      |                              |               |
|-------------------------|-----------|-------------------------------|------|------------------------------|---------------|
| <b>Patient ID:</b>      | 05        | <b>QRS Duration:</b>          | 96ms | <b>Amplitude Adjustment:</b> | -15%          |
| <b>Age &amp; Sex:</b>   | 60 Female | <b>QRS Axis:</b>              | +37° | <b>Duration Adjustment:</b>  | -10%          |
| <b>Conduction Type:</b> | LVH       | <b>Right Atrial Overload:</b> | No   | <b>Total Points</b>          | 0 points (0%) |

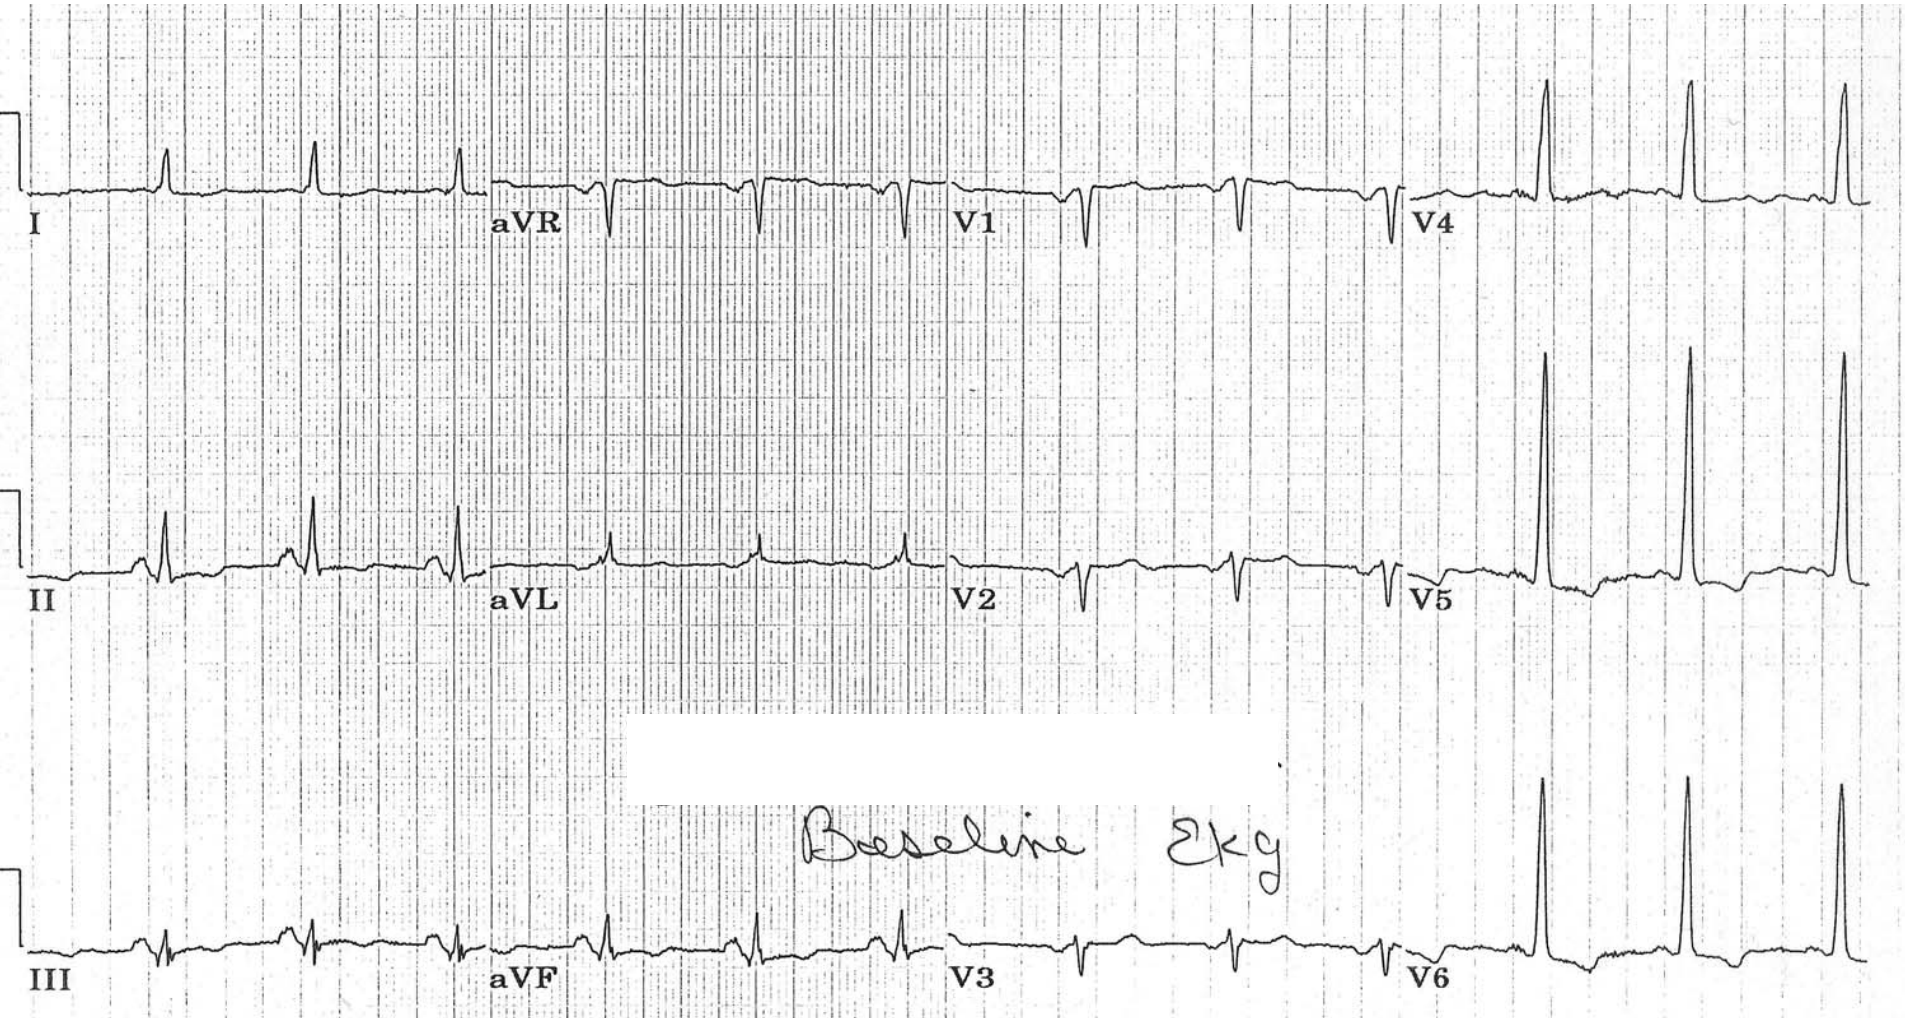

**QRS Scoring**

Patient ID 05 QRS duration 96ms Amplitude adjust -15%  
 (↑1%/yr age 20-54; ↓1%/yr >55 yrs; ↓ 10% for females)

Age & gender 60 Female QRS axis +37° Duration adjust -10% RAO(\*\*, \*\*\*)Yes(No)  
 (↓ 10% for females)

| Lead   | RBBB                  |     | LAFB                  |     | LAFB + RBBB           |     | LVH                                     |     | No Confounders        |     |
|--------|-----------------------|-----|-----------------------|-----|-----------------------|-----|-----------------------------------------|-----|-----------------------|-----|
|        | Criteria              | Pts | Criteria              | Pts | Criteria              | Pts | Criteria                                | Pts | Criteria              | Pts |
| I      | Q ≥ 30 ms             | 1   | Q ≥ 30 ms             | 1   | Q ≥ 30 ms             | 1   | Q ≥ 30 ms                               | 1   | Q ≥ 30 ms             | 1   |
|        | R/Q ≤ 1<br>R ≤ 0.2 mV | 1   | R/Q ≤ 1<br>R ≤ 0.2 mV | 1   | R/Q ≤ 1<br>R ≤ 0.2 mV | 1   | R/Q ≤ 1<br>R ≤ 0.2 mV                   | 1   | R/Q ≤ 1<br>R ≤ 0.2 mV | 1   |
| II     | Q ≥ 40 ms             | 2   | Q ≥ 40 ms             | 2   | Q ≥ 40 ms             | 2   | Q ≥ 40 ms                               | 2   | Q ≥ 40 ms             | 2   |
|        | Q ≥ 30 ms             | 1   | Q ≥ 30 ms             | 1   | Q ≥ 30 ms             | 1   | Q ≥ 30 ms                               | 1   | Q ≥ 30 ms             | 1   |
| aVL    | Q ≥ 30 ms             | 1   | Q ≥ 40 ms             | 1   | Q ≥ 40 ms             | 1   | Q ≥ 40 ms                               | 1   | Q ≥ 30 ms             | 1   |
| aVF    | Q ≥ 50 ms             | 3   | Q ≥ 50 ms             | 3   | Q ≥ 50 ms             | 3   | Q ≥ 60 ms                               | 3   | Q ≥ 50 ms             | 3   |
| V1     | Q ≥ 40 ms             | 2   | Q ≥ 40 ms             | 2   | Q ≥ 40 ms             | 2   | Q ≥ 50 ms                               | 2   | Q ≥ 40 ms             | 2   |
|        | Q ≥ 30 ms             | 1   | Q ≥ 30 ms             | 1   | Q ≥ 30 ms             | 1   | Q ≥ 40 ms                               | 1   | Q ≥ 30 ms             | 1   |
| Ant.   | any Q                 | 1   | any QR                | 1   | any Q                 | 1   | any QR<br>(or any Q if *)<br>Ntchlnit40 | 1   | any Q                 | 1   |
| Post.* | Init R ≥ 60 ms        | 2   | R/S ≥ 1               | 1   | Init R ≥ 60 ms        | 2   | R/S ≥ 1                                 | 1   | R/S ≥ 1               | 1   |
| V2     | Init R ≥ 15 mV        | 1   | R ≥ 50 ms             | 2   | Init R ≥ 15 mV        | 1   | R ≥ 50 ms                               | 2   | R ≥ 50 ms             | 2   |
|        | Init R ≥ 10 mV        | 1   | R ≥ 40 ms             | 1   | Init R ≥ 10 mV        | 1   | R ≥ 40 ms                               | 1   | R ≥ 40 ms             | 1   |
| Ant.   | any Q                 | 1   | any QR                | 1   | any Q                 | 1   | any QR<br>(or any Q if *)<br>Ntchlnit40 | 1   | any Q                 | 1   |
| Post.* | Init R ≥ 2.5 mV       | 2   | R/S ≥ 15              | 1   | Init R ≥ 2.5 mV       | 2   | R/S ≥ 15                                | 1   | R/S ≥ 15              | 1   |
| V3     | Init R ≥ 2.0 mV       | 1   | R ≥ 50 ms             | 2   | Init R ≥ 2.0 mV       | 1   | R ≥ 50 ms                               | 2   | R ≥ 50 ms             | 2   |
|        | Q ≥ 30 ms             | 1   | R ≥ 15 mV             | 1   | Q ≥ 30 ms             | 1   | R ≥ 15 mV                               | 1   | R ≥ 15 mV             | 1   |
| Ant.   | any Q                 | 1   | any QR                | 1   | any Q                 | 1   | any QR<br>(or any Q if *)<br>Ntchlnit40 | 1   | any Q                 | 1   |
| Post.* | Init R ≥ 70 ms        | 2   | R ≥ 80 ms             | 2   | Init R ≥ 70 ms        | 2   | R ≥ 80 ms                               | 2   | R ≥ 80 ms             | 2   |
| V4     | Init R ≥ 2.5 mV       | 2   | R ≥ 2 mV              | 1   | Init R ≥ 2.5 mV       | 2   | R ≥ 2 mV                                | 1   | R ≥ 2 mV              | 1   |
|        | Init R ≥ 2.0 mV       | 1   | R ≥ 50 ms             | 1   | Init R ≥ 2.0 mV       | 1   | R ≥ 50 ms                               | 1   | R ≥ 50 ms             | 1   |
| Ant.   | any Q                 | 1   | any QR                | 1   | any Q                 | 1   | any QR<br>(or any Q if *)<br>Ntchlnit40 | 1   | any Q                 | 1   |
| Post.* | Init R ≥ 70 ms        | 2   | R ≥ 80 ms             | 2   | Init R ≥ 70 ms        | 2   | R ≥ 80 ms                               | 2   | R ≥ 80 ms             | 2   |
| V5     | Init R ≥ 2.5 mV       | 2   | R ≥ 2 mV              | 1   | Init R ≥ 2.5 mV       | 2   | R ≥ 2 mV                                | 1   | R ≥ 2 mV              | 1   |
|        | Init R ≥ 2.0 mV       | 1   | R ≥ 50 ms             | 1   | Init R ≥ 2.0 mV       | 1   | R ≥ 50 ms                               | 1   | R ≥ 50 ms             | 1   |
| Ant.   | any Q                 | 1   | any QR                | 1   | any Q                 | 1   | any QR<br>(or any Q if *)<br>Ntchlnit40 | 1   | any Q                 | 1   |
| Post.* | Init R ≥ 70 ms        | 2   | R ≥ 80 ms             | 2   | Init R ≥ 70 ms        | 2   | R ≥ 80 ms                               | 2   | R ≥ 80 ms             | 2   |
| V6     | Init R ≥ 2.5 mV       | 2   | R ≥ 2 mV              | 1   | Init R ≥ 2.5 mV       | 2   | R ≥ 2 mV                                | 1   | R ≥ 2 mV              | 1   |
|        | Init R ≥ 2.0 mV       | 1   | R ≥ 50 ms             | 1   | Init R ≥ 2.0 mV       | 1   | R ≥ 50 ms                               | 1   | R ≥ 50 ms             | 1   |
| Ant.   | any Q                 | 1   | any QR                | 1   | any Q                 | 1   | any QR<br>(or any Q if *)<br>Ntchlnit40 | 1   | any Q                 | 1   |
| Post.* | Init R ≥ 70 ms        | 2   | R ≥ 80 ms             | 2   | Init R ≥ 70 ms        | 2   | R ≥ 80 ms                               | 2   | R ≥ 80 ms             | 2   |
| Total  | Points                |     | Points                |     | Points                |     | Points                                  | 0   | Points                |     |

| Lead    | Criteria                                               | Pts |
|---------|--------------------------------------------------------|-----|
| I       | any Q                                                  | 1   |
|         | R/Q ≤ 1<br>R/S ≤ 1<br>R/Q ≤ 15<br>R/S ≤ 15             | 2   |
| II      | Q ≥ 40 ms                                              | 2   |
|         | Q ≥ 30 ms                                              | 1   |
| aVL     | Q ≥ 50 ms                                              | 2   |
| aVF     | Q ≥ 50 ms                                              | 2   |
| V1      | Ntchlnit40                                             | 1   |
| Ant.*** | R ≥ 0.3 mV<br>R ≥ 30 ms<br>R ≥ 0.2 mV<br>R ≥ 20 ms     | 2   |
| V1 Post | S/S' ≥ 2.0<br>S/S' ≥ 1.5<br>S/S' ≥ 125                 | 3   |
| V2      | Ntchlnit40                                             | 1   |
| Ant.*** | R ≥ 0.4 mV<br>R ≥ 30 ms<br>R ≥ 0.3 mV<br>R ≥ 20 ms     | 2   |
| V2 Post | S/S' ≥ 2.5<br>S/S' ≥ 2.0<br>S/S' ≥ 15                  | 3   |
| V5      | any Q<br>R/R' ≥ 2<br>R/R' ≥ 1<br>R/S ≤ 2<br>R ≤ 0.5 mV | 1   |
| V6      | Q ≥ 20 ms<br>R/R' ≥ 2<br>R/R' ≥ 1<br>R/S ≤ 2           | 1   |
| Total   | Points                                                 |     |

%LV infarct (3 \* #pts) \_\_\_\_\_

%LV infarct (3 x #pts) \_\_\_\_\_ %LV infarct (3 x #pts) \_\_\_\_\_ %LV infarct (3 x #pts) \_\_\_\_\_ %LV infarct (3 x #pts) 0 %LV infarct (3 x #pts) \_\_\_\_\_

\* (for LVH) if ≥ 4 other points in leads I, aVL, V4, V5 or V6 then count QS in V1+V3  
 \*\* (RAO) if P positive amp in V1 ≥ 0.1mV or aVF P ≥ 0.175 mV, then exclude V1+V2 R-criteria points  
 \*\*\* (RAO) if P positive amp in V1 ≥ 0.1mV or aVF P ≥ 0.175 mV, then exclude V1+V2 R-criteria points

|                         |           |                               |       |                              |                |
|-------------------------|-----------|-------------------------------|-------|------------------------------|----------------|
| <b>Patient ID:</b>      | 06        | <b>QRS Duration:</b>          | 140ms | <b>Amplitude Adjustment:</b> | -15%           |
| <b>Age &amp; Sex:</b>   | 60 Female | <b>QRS Axis:</b>              | +30°  | <b>Duration Adjustment:</b>  | -10%           |
| <b>Conduction Type:</b> | LBBB      | <b>Right Atrial Overload:</b> | No    | <b>Total Points:</b>         | 5 points (15%) |

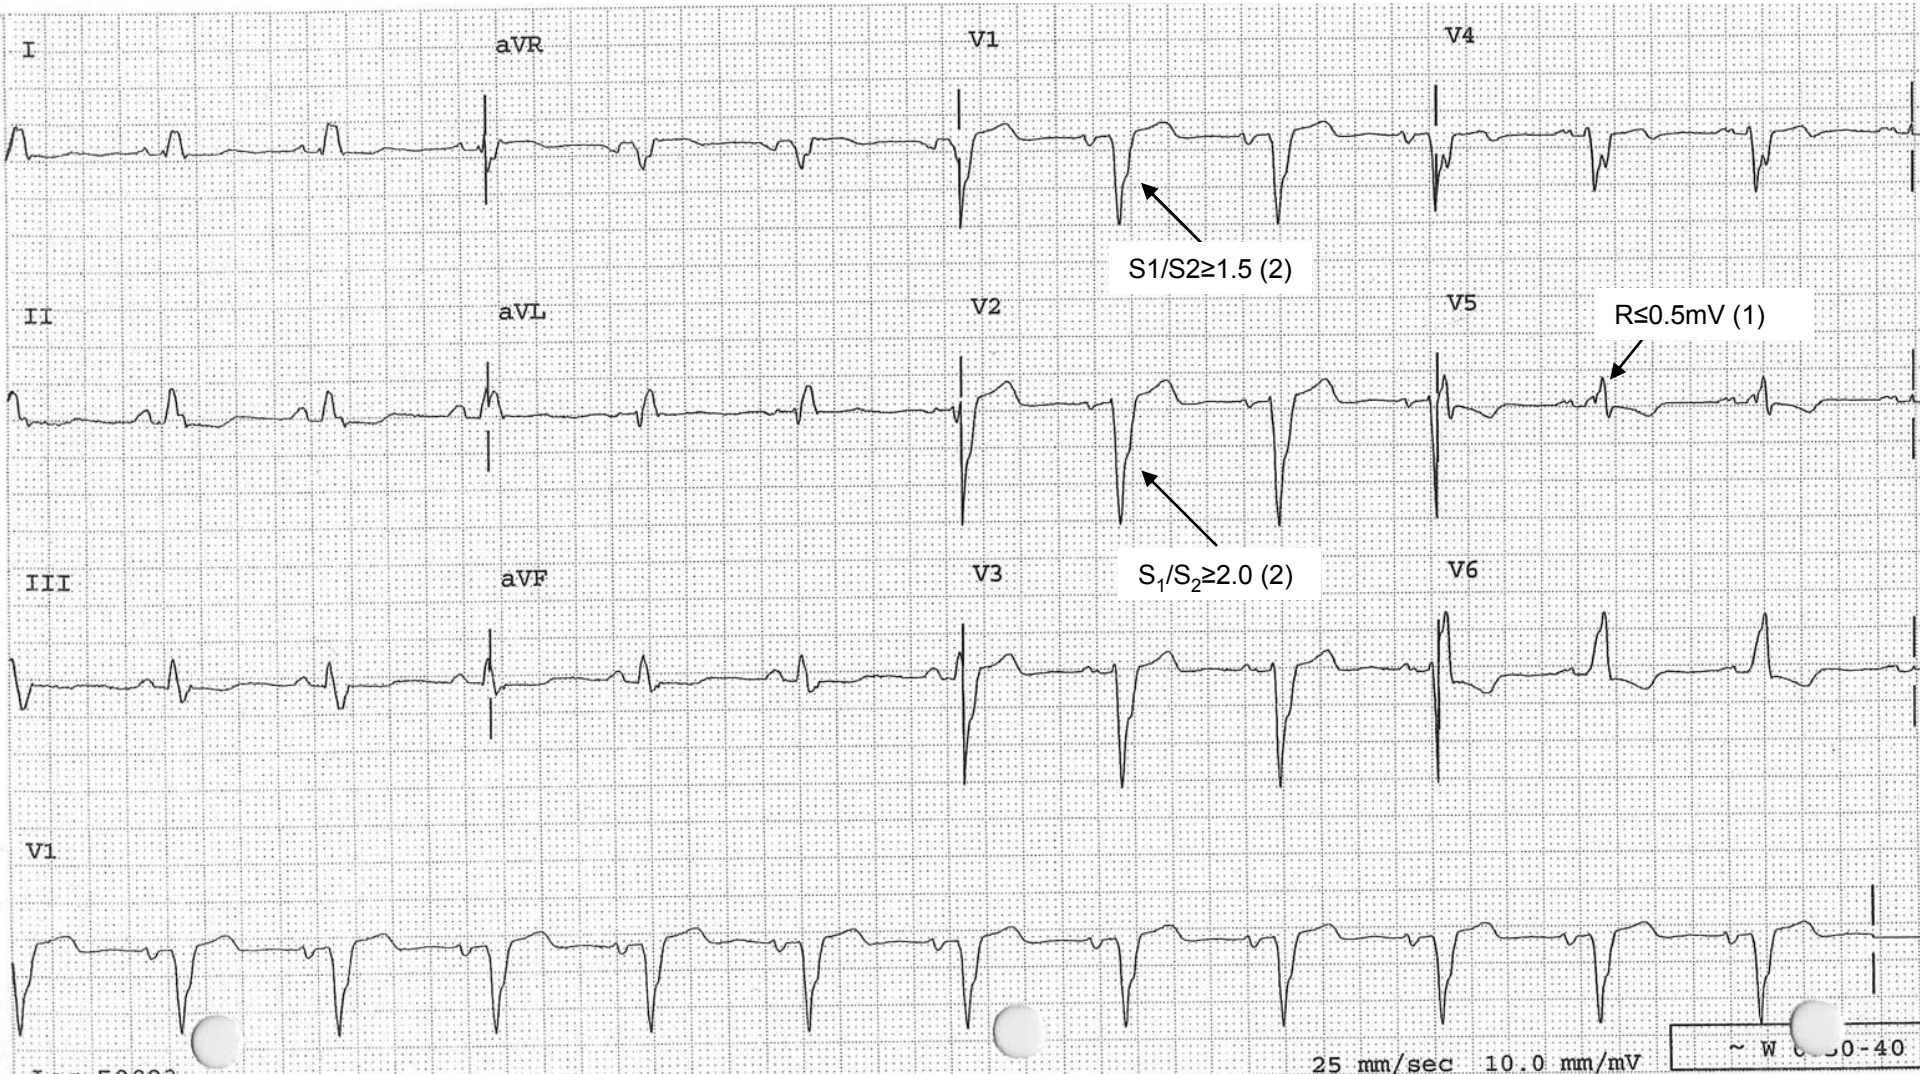

QRS Scoring

Patient ID 06 QRS duration 140ms Amplitude adjust -15%  
 (↑1%/yr age 20-54; ↓1%/yr >55 yrs; ↓ 10% for females)

Age & gender 60 Female QRS axis +30° Duration adjust -10% RAO(\*\*, \*\*\*)Yes No  
 (↓ 10% for females)

| Lead         | RBBB            |     | LAFB          |     | LAFB + RBBB     |     | LVH             |     | No Confounders |     |
|--------------|-----------------|-----|---------------|-----|-----------------|-----|-----------------|-----|----------------|-----|
|              | Criteria        | Pts | Criteria      | Pts | Criteria        | Pts | Criteria        | Pts | Criteria       | Pts |
| I            | Q ≥ 30 ms       | 1   | Q ≥ 30 ms     | 1   | Q ≥ 30 ms       | 1   | Q ≥ 30 ms       | 1   | Q ≥ 30 ms      | 1   |
|              | R/Q ≤ 1         | 1   | R/Q ≤ 1       | 1   | R/Q ≤ 1         | 1   | R/Q ≤ 1         | 1   | R/Q ≤ 1        | 1   |
|              | R ≤ 0.2 mV      |     | R ≤ 0.2 mV    |     | R ≤ 0.2 mV      |     | R ≤ 0.2 mV      |     | R ≤ 0.2 mV     |     |
| II           | Q ≥ 40 ms       | 2   | Q ≥ 40 ms     | 2   | Q ≥ 40 ms       | 2   | Q ≥ 40 ms       | 2   | Q ≥ 40 ms      | 2   |
|              | Q ≥ 30 ms       | 1   | Q ≥ 30 ms     | 1   | Q ≥ 30 ms       | 1   | Q ≥ 30 ms       | 1   | Q ≥ 30 ms      | 1   |
|              | Q ≥ 30 ms       | 1   | Q ≥ 40 ms     | 1   | Q ≥ 40 ms       | 1   | Q ≥ 40 ms       | 1   | Q ≥ 30 ms      | 1   |
| aVL          | Q ≥ 30 ms       | 1   | Q ≥ 40 ms     | 1   | Q ≥ 40 ms       | 1   | Q ≥ 40 ms       | 1   | Q ≥ 30 ms      | 1   |
|              | R/Q ≤ 1         | 1   | R/Q ≤ 1       | 1   | R/Q ≤ 1         | 1   | R/Q ≤ 1         | 1   | R/Q ≤ 1        | 1   |
|              | Q ≥ 50 ms       | 3   | Q ≥ 50 ms     | 3   | Q ≥ 50 ms       | 3   | Q ≥ 60 ms       | 3   | Q ≥ 50 ms      | 3   |
| aVF          | Q ≥ 40 ms       | 2   | Q ≥ 40 ms     | 2   | Q ≥ 40 ms       | 2   | Q ≥ 50 ms       | 2   | Q ≥ 40 ms      | 2   |
|              | Q ≥ 30 ms       | 1   | Q ≥ 30 ms     | 1   | Q ≥ 30 ms       | 1   | Q ≥ 40 ms       | 1   | Q ≥ 30 ms      | 1   |
|              | R/Q ≤ 1         | 2   | R/Q ≤ 1       | 2   | R/Q ≤ 1         | 2   | R/Q ≤ 1         | 2   | R/Q ≤ 1        | 2   |
| V1           | R/Q ≤ 2         | 1   | R/Q ≤ 2       | 1   | R/Q ≤ 2         | 1   | R/Q ≤ 2         | 1   | R/Q ≤ 2        | 1   |
|              | Q ≥ 50 ms       | 2   | Q ≥ 50 ms     | 2   | Q ≥ 50 ms       | 2   | any QR          | 2   | any QR         | 2   |
|              | any Q           | 1   | any QR        | 1   | any Q           | 1   | (or any Q if *) | 1   | any Q          | 1   |
| Ant.         | Init R ≤ 20 ms  |     |               |     |                 |     | NtchInit40      |     |                |     |
|              | Init R ≥ 60 ms  | 2   | R ≥ 50 ms     | 2   | Init R ≥ 60 ms  | 2   | R ≥ 50 ms       | 2   | R ≥ 50 ms      | 2   |
|              | Init R ≥ 15 mV  |     | R ≥ 1mV       |     | Init R ≥ 15 mV  |     | R ≥ 1mV         |     | R ≥ 1mV        |     |
| V2           | Init R ≥ 50 ms  | 1   | R ≥ 40 ms     | 1   | Init R ≥ 50 ms  | 1   | R ≥ 40 ms       | 1   | R ≥ 40 ms      | 1   |
|              | Init R ≥ 10 mV  |     | R ≥ 0.7 mV    |     | Init R ≥ 10 mV  |     | R ≥ 0.7 mV      |     | R ≥ 0.7 mV     |     |
|              | Qs0.2&Ss0.2mV   | 1   | Qs0.2&Ss0.2mV | 1   | Qs0.2&Ss0.2mV   | 1   | Qs0.2&Ss0.2mV   | 1   | Qs0.2&Ss0.2mV  | 1   |
| Ant.         | Q ≥ 50 ms       | 2   | any QR        | 1   | Q ≥ 50 ms       | 2   | any QR          | 1   | any Q          | 1   |
|              | any Q           | 1   | R ≤ 10 ms     |     | any Q           | 1   | (or any Q if *) |     | R ≤ 10 ms      |     |
|              | R ≤ 10 ms       |     | R ≤ 0.1mV     |     | R ≤ 10 ms       |     | NtchInit40      |     | R ≤ 0.1mV      |     |
| V2           | R ≤ 0.1mV       |     | R/S ≥ 15      | 1   | R ≤ 0.1mV       |     | R/S ≥ 15        | 1   | R/S ≥ 15       | 1   |
|              | Init R ≥ 70 ms  | 2   | R ≥ 60 ms     | 2   | Init R ≥ 70 ms  | 2   | R ≥ 60 ms       | 2   | R ≥ 60 ms      | 2   |
|              | Init R ≥ 2.5 mV |     | R ≥ 2 mV      |     | Init R ≥ 2.5 mV |     | R ≥ 2 mV        |     | R ≥ 2 mV       |     |
| Post.**      | Init R ≥ 50 ms  | 1   | R ≥ 50 ms     | 1   | Init R ≥ 50 ms  | 1   | R ≥ 50 ms       | 1   | R ≥ 50 ms      | 1   |
|              | Init R ≥ 2.0 mV |     | R ≥ 15 mV     |     | Init R ≥ 2.0 mV |     | R ≥ 15 mV       |     | R ≥ 15 mV      |     |
|              | Qs0.3&Ss0.3mV   | 1   | Qs0.3&Ss0.3mV | 1   | Qs0.3&Ss0.3mV   | 1   | Qs0.3&Ss0.3mV   | 1   | Qs0.3&Ss0.3mV  | 1   |
| V3           | Q ≥ 30 ms       | 2   | Q ≥ 30 ms     | 2   | Q ≥ 30 ms       | 2   | QR&(Q ≥ 30 ms)  | 2   | Q ≥ 30 ms      | 2   |
|              | R ≤ 10 ms       |     | R ≤ 10 ms     |     | R ≤ 10 ms       |     | NtchInit40      |     | R ≤ 10 ms      |     |
|              | Q ≥ 20 ms       | 1   | Q ≥ 20 ms     | 1   | Q ≥ 20 ms       | 1   | any QR          | 1   | Q ≥ 20 ms      | 1   |
| V4           | R ≤ 20 ms       |     | R ≤ 20 ms     |     | R ≤ 20 ms       |     | (or any Q if *) |     | R ≤ 20 ms      |     |
|              | Q ≥ 20 ms       | 1   | Q ≥ 20 ms     | 1   | Q ≥ 20 ms       | 1   | Q ≥ 20 ms       | 1   | Q ≥ 20 ms      | 1   |
|              | R/Q ≤ 0.5       | 2   | R/Q ≤ 0.5     | 2   | R/Q ≤ 0.5       | 2   | R/Q ≤ 0.5       | 2   | R/Q ≤ 0.5      | 2   |
| V5           | R/S ≤ 0.5       |     | R/S ≤ 0.5     |     | R/S ≤ 0.5       |     | R/S ≤ 0.5       |     | R/S ≤ 0.5      |     |
|              | R/Q ≤ 1         | 1   | R/Q ≤ 1       | 1   | R/Q ≤ 1         | 1   | R/Q ≤ 1         | 1   | R/Q ≤ 1        | 1   |
|              | R/S ≤ 1         |     | R/S ≤ 1       |     | R/S ≤ 1         |     | R/S ≤ 1         |     | R/S ≤ 1        |     |
| V6           | R ≤ 0.5 mV      |     | R ≤ 0.5 mV    |     | R ≤ 0.5 mV      |     | R ≤ 0.5 mV      |     | R ≤ 0.5 mV     |     |
|              | NtchInit40      |     | NtchInit40    |     | NtchInit40      |     | NtchInit40      |     | NtchInit40     |     |
|              | Q ≥ 30 ms       | 1   | Q ≥ 30 ms     | 1   | Q ≥ 30 ms       | 1   | Q ≥ 30 ms       | 1   | Q ≥ 30 ms      | 1   |
| V5           | R/Q ≤ 1         | 2   | R/Q ≤ 1       | 2   | R/Q ≤ 1         | 2   | R/Q ≤ 1         | 2   | R/Q ≤ 1        | 2   |
|              | R/S ≤ 1         |     | R/S ≤ 1       |     | R/S ≤ 1         |     | R/S ≤ 1         |     | R/S ≤ 1        |     |
|              | R/Q ≤ 2         | 1   | R/Q ≤ 2       | 1   | R/Q ≤ 2         | 1   | R/Q ≤ 2         | 1   | R/Q ≤ 2        | 1   |
| V6           | R/S ≤ 2         |     | R/S ≤ 15      |     | R/S ≤ 2         |     | R/S ≤ 2         |     | R/S ≤ 2        |     |
|              | R ≤ 0.6 mV      |     | R ≤ 0.6 mV    |     | R ≤ 0.6 mV      |     | R ≤ 0.6 mV      |     | R ≤ 0.6 mV     |     |
|              | NtchInit40      |     | NtchInit40    |     | NtchInit40      |     | NtchInit40      |     | NtchInit40     |     |
| V6           | Q ≥ 30 ms       | 1   | Q ≥ 30 ms     | 1   | Q ≥ 30 ms       | 1   | Q ≥ 30 ms       | 1   | Q ≥ 30 ms      | 1   |
|              | R/Q ≤ 1         | 2   | R/Q ≤ 1       | 2   | R/Q ≤ 1         | 2   | R/Q ≤ 1         | 2   | R/Q ≤ 1        | 2   |
|              | R/S ≤ 1         |     | R/S ≤ 1       |     | R/S ≤ 1         |     | R/S ≤ 1         |     | R/S ≤ 1        |     |
| Total        | R/Q ≤ 3         | 1   | R/Q ≤ 3       | 1   | R/Q ≤ 3         | 1   | R/Q ≤ 3         | 1   | R/Q ≤ 3        | 1   |
|              | R/S ≤ 3         |     | R/S ≤ 2       |     | R/S ≤ 3         |     | R/S ≤ 3         |     | R/S ≤ 3        |     |
|              | R ≤ 0.6 mV      |     | R ≤ 0.6 mV    |     | R ≤ 0.6 mV      |     | R ≤ 0.6 mV      |     | R ≤ 0.6 mV     |     |
|              | NtchInit40      |     | NtchInit40    |     | NtchInit40      |     | NtchInit40      |     | NtchInit40     |     |
| <b>Total</b> | <b>Points</b>   |     | <b>Points</b> |     | <b>Points</b>   |     | <b>Points</b>   |     | <b>Points</b>  |     |

| LBBB    |            |     |
|---------|------------|-----|
| Lead    | Criteria   | Pts |
| I       | any Q      | 1   |
|         | R/Q ≤ 1    | 2   |
|         | R/S ≤ 1    |     |
| II      | R/Q ≤ 15   | 1   |
|         | R/S ≤ 15   |     |
|         | Q ≥ 40 ms  | 2   |
| aVL     | Q ≥ 30 ms  | 1   |
|         | R/Q ≤ 0.5  | 1   |
|         | R/S ≤ 0.5  |     |
| aVF     | Q ≥ 50 ms  | 2   |
|         | Q ≥ 40 ms  | 1   |
|         | R/Q ≤ 0.5  | 1   |
| V1      | R/S ≤ 0.5  | 2   |
|         | R/Q ≤ 0.5  |     |
|         | R/S ≤ 1    | 1   |
| aVF     | R/S ≤ 1    | 1   |
|         | Q ≥ 50 ms  | 2   |
|         | Q ≥ 40 ms  | 1   |
| V1      | R/Q ≤ 0.5  | 1   |
|         | R/S ≤ 0.5  |     |
|         | R/Q ≤ 1    | 1   |
| Ant.*** | NtchInit40 | 1   |
|         | R ≥ 0.3 mV | 2   |
|         | R ≥ 30 ms  |     |
| V1      | R ≥ 0.2 mV | 1   |
|         | R ≥ 20 ms  |     |
|         | S/S' ≥ 2.0 | 3   |
| Post    | S/S' ≥ 15  | 2   |
|         | S/S' ≥ 125 | 1   |
|         | NtchInit40 | 1   |
| Ant.*** | R ≥ 0.4 mV | 2   |
|         | R ≥ 30 ms  |     |
|         | R ≥ 0.3 mV | 1   |
| V2      | R ≥ 20 ms  |     |
|         | S/S' ≥ 2.5 | 3   |
|         | S/S' ≥ 2.0 | 2   |
| Post    | S/S' ≥ 15  | 1   |
|         | any Q      | 1   |
|         | R/R' ≥ 2   | 2   |
| V5      | R/R' ≥ 1   | 1   |
|         | R/S ≤ 2    |     |
|         | R ≤ 0.5 mV | 1   |
| V6      | Q ≥ 20 ms  | 1   |
|         | R/R' ≥ 2   | 2   |
|         | R/R' ≥ 1   | 1   |
| Total   | R/S ≤ 2    | 1   |
|         | R ≤ 0.6 mV | 1   |
|         | Points     | 5   |

%LV infarct 15  
(3 x #pts)

%LV infarct (3 x #pts) \_\_\_\_\_ %LV infarct (3 x #pts) \_\_\_\_\_

\* (for LVH) if ≥4 other points in leads I, aVL, V4, V5 or V6 then count QS in V1+V3  
 \*\* (RAO) if P positive amp in V1≥0.1mV or aVF P ≥0.175 mV, then exclude V1-V2 Post criteria  
 \*\*\* (RAO) if P positive amp in V1 ≥0.1mV or aVF P ≥0.175 mV, then exclude V1-V2 R-criteria points

|                         |                |                               |       |                              |                |
|-------------------------|----------------|-------------------------------|-------|------------------------------|----------------|
| <b>Patient ID:</b>      | 07             | <b>QRS Duration:</b>          | 108ms | <b>Amplitude Adjustment:</b> | -3%            |
| <b>Age &amp; Sex:</b>   | 58 Male        | <b>QRS Axis:</b>              | +39°  | <b>Duration Adjustment:</b>  | 0%             |
| <b>Conduction Type:</b> | No Confounders | <b>Right Atrial Overload:</b> | No    | <b>Total Points</b>          | 9 points (27%) |

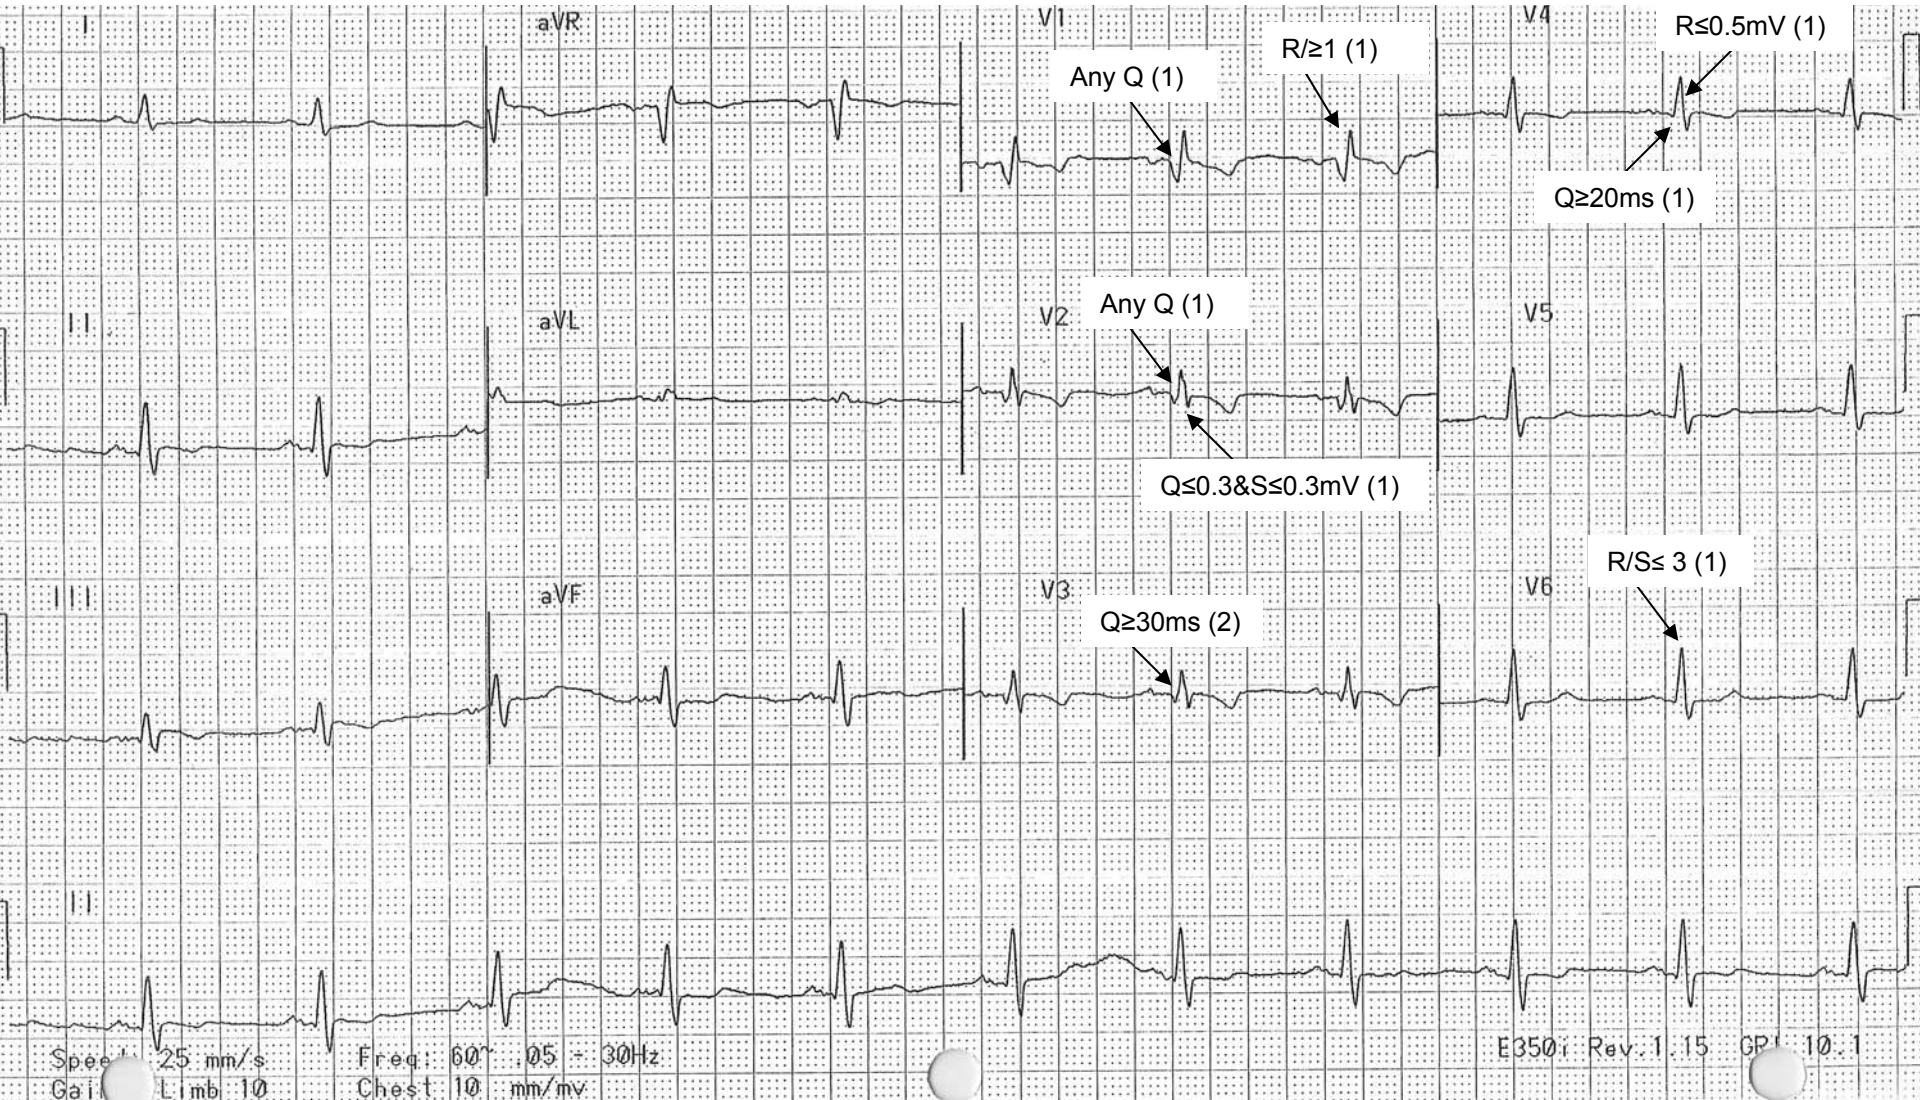

Patient ID 07

QRS duration 108ms

Amplitude adjust -3%

(↑1%/yr age 20-54; ↓1%/yr >55 yrs; ↓ 10% for females)

Age & gender 58 Male

QRS axis +39°

Duration adjust 0%

RAO(\*\*, \*\*\*)Yes **(No)**

(↓ 10% for females)

|         | RBBB            |     | LAFB          |     | LAFB + RBBB     |     | LVH             |     | No Confounders |     |
|---------|-----------------|-----|---------------|-----|-----------------|-----|-----------------|-----|----------------|-----|
| Lead    | Criteria        | Pts | Criteria      | Pts | Criteria        | Pts | Criteria        | Pts | Criteria       | Pts |
| I       | Q ≥ 30 ms       | 1   | Q ≥ 30 ms     | 1   | Q ≥ 30 ms       | 1   | Q ≥ 30 ms       | 1   | Q ≥ 30 ms      | 1   |
|         | R/Q ≤ 1         | 1   | R/Q ≤ 1       | 1   | R/Q ≤ 1         | 1   | R/Q ≤ 1         | 1   | R/Q ≤ 1        | 1   |
|         | R ≤ 0.2 mV      |     | R ≤ 0.2 mV    |     | R ≤ 0.2 mV      |     | R ≤ 0.2 mV      |     | R ≤ 0.2 mV     |     |
| II      | Q ≥ 40 ms       | 2   | Q ≥ 40 ms     | 2   | Q ≥ 40 ms       | 2   | Q ≥ 40 ms       | 2   | Q ≥ 40 ms      | 2   |
|         | Q ≥ 30 ms       | 1   | Q ≥ 30 ms     | 1   | Q ≥ 30 ms       | 1   | Q ≥ 30 ms       | 1   | Q ≥ 30 ms      | 1   |
|         | Q ≥ 30 ms       | 1   | Q ≥ 40 ms     | 1   | Q ≥ 40 ms       | 1   | Q ≥ 40 ms       | 1   | Q ≥ 30 ms      | 1   |
| aVL     | Q ≥ 30 ms       | 1   | Q ≥ 40 ms     | 1   | Q ≥ 40 ms       | 1   | Q ≥ 40 ms       | 1   | Q ≥ 30 ms      | 1   |
|         | R/Q ≤ 1         | 1   | R/Q ≤ 1       | 1   | R/Q ≤ 1         | 1   | R/Q ≤ 1         | 1   | R/Q ≤ 1        | 1   |
|         | Q ≥ 50 ms       | 3   | Q ≥ 50 ms     | 3   | Q ≥ 50 ms       | 3   | Q ≥ 60 ms       | 3   | Q ≥ 50 ms      | 3   |
| aVF     | Q ≥ 40 ms       | 2   | Q ≥ 40 ms     | 2   | Q ≥ 40 ms       | 2   | Q ≥ 50 ms       | 2   | Q ≥ 40 ms      | 2   |
|         | Q ≥ 30 ms       | 1   | Q ≥ 30 ms     | 1   | Q ≥ 30 ms       | 1   | Q ≥ 40 ms       | 1   | Q ≥ 30 ms      | 1   |
|         | R/Q ≤ 1         | 2   | R/Q ≤ 1       | 2   | R/Q ≤ 1         | 2   | R/Q ≤ 1         | 2   | R/Q ≤ 1        | 2   |
| V1      | R/Q ≤ 2         | 1   | R/Q ≤ 2       | 1   | R/Q ≤ 2         | 1   | R/Q ≤ 2         | 1   | R/Q ≤ 2        | 1   |
|         | Q ≥ 50 ms       | 2   | Q ≥ 50 ms     | 2   | Q ≥ 50 ms       | 2   | any QR          |     | any QR         |     |
|         | any Q           | 1   | any QR        | 1   | any Q           | 1   | (or any Q if *) |     | any Q          | 1   |
| Ant.    | Init R ≤ 20 ms  |     |               |     |                 |     | NtchInit40      |     |                |     |
|         | R/S ≥ 1         | 1   | R/S ≥ 1       | 1   | R/S ≥ 1         | 1   | R/S ≥ 1         | 1   | R/S ≥ 1        | 1   |
|         | Init R ≥ 60 ms  | 2   | R ≥ 50 ms     | 2   | Init R ≥ 60 ms  | 2   | R ≥ 50 ms       | 2   | R ≥ 50 ms      | 2   |
| Post.** | Init R ≥ 15 mV  |     | R ≥ 1mV       |     | Init R ≥ 15 mV  |     | R ≥ 1mV         |     | R ≥ 1mV        |     |
|         | Init R ≥ 50 ms  | 1   | R ≥ 40 ms     | 1   | Init R ≥ 50 ms  | 1   | R ≥ 40 ms       | 1   | R ≥ 40 ms      | 1   |
|         | Init R ≥ 10 mV  |     | R ≥ 0.7 mV    |     | Init R ≥ 10 mV  |     | R ≥ 0.7 mV      |     | R ≥ 0.7 mV     |     |
| V2      | Q ≥ 50 ms       | 2   | Qs0.2&Ss0.2mV | 1   | Q ≥ 50 ms       | 2   | Qs0.2&Ss0.2 mV  | 1   | Qs0.2&Ss0.2mV  | 1   |
|         | any Q           | 1   | any QR        | 1   | any Q           | 1   | any QR          | 1   | any Q          | 1   |
|         | R ≤ 10 ms       |     | R ≤ 10ms      |     | R ≤ 10 ms       |     | (or any Q if *) |     | R ≤ 10ms       |     |
| V2      | R ≤ 0.1mV       |     | R ≤ 0.1mV     |     | R ≤ 0.1mV       |     | R ≤ 0.1mV       |     | R ≤ 0.1mV      |     |
|         | R/S ≥ 15        | 1   | R/S ≥ 15      | 1   | R/S ≥ 15        | 1   | R/S ≥ 15        | 1   | R/S ≥ 15       | 1   |
|         | Init R ≥ 70 ms  | 2   | R ≥ 60 ms     | 2   | Init R ≥ 70 ms  | 2   | R ≥ 60 ms       | 2   | R ≥ 60 ms      | 2   |
| Post.** | Init R ≥ 2.5 mV |     | R ≥ 2 mV      |     | Init R ≥ 2.5 mV |     | R ≥ 2 mV        |     | R ≥ 2 mV       |     |
|         | Init R ≥ 50 ms  | 1   | R ≥ 50 ms     | 1   | Init R ≥ 50 ms  | 1   | R ≥ 50 ms       | 1   | R ≥ 50 ms      | 1   |
|         | Init R ≥ 2.0 mV |     | R ≥ 15 mV     |     | Init R ≥ 2.0 mV |     | R ≥ 15 mV       |     | R ≥ 15 mV      |     |
| V3      | Q ≥ 30 ms       | 2   | Q ≥ 30 ms     | 2   | Q ≥ 30 ms       | 2   | QR&(Q ≥ 30 ms)  | 2   | Q ≥ 30 ms      | 2   |
|         | R ≤ 10 ms       |     | R ≤ 10 ms     |     | R ≤ 10 ms       |     | NtchInit40      |     | R ≤ 10 ms      |     |
|         | Q ≥ 20 ms       | 1   | Q ≥ 20 ms     | 1   | Q ≥ 20 ms       | 1   | any QR          |     | Q ≥ 20 ms      | 1   |
| V4      | R ≤ 20 ms       |     | R ≤ 20 ms     |     | R ≤ 20 ms       |     | (or any Q if *) |     | R ≤ 20 ms      |     |
|         | Q ≥ 20 ms       | 1   | Q ≥ 20 ms     | 1   | Q ≥ 20 ms       | 1   | Q ≥ 20 ms       | 1   | Q ≥ 20 ms      | 1   |
|         | R/Q ≤ 0.5       | 2   | R/Q ≤ 0.5     | 2   | R/Q ≤ 0.5       | 2   | R/Q ≤ 0.5       | 2   | R/Q ≤ 0.5      | 2   |
| V5      | R/S ≤ 0.5       |     | R/S ≤ 0.5     |     | R/S ≤ 0.5       |     | R/S ≤ 0.5       |     | R/S ≤ 0.5      |     |
|         | R/Q ≤ 1         | 1   | R/Q ≤ 1       | 1   | R/Q ≤ 1         | 1   | R/Q ≤ 1         | 1   | R/Q ≤ 1        | 1   |
|         | R/S ≤ 1         |     | R/S ≤ 1       |     | R/S ≤ 1         |     | R/S ≤ 1         |     | R/S ≤ 1        |     |
| V6      | R ≤ 0.5 mV      |     | R ≤ 0.5 mV    |     | R ≤ 0.5 mV      |     | R ≤ 0.5 mV      |     | R ≤ 0.5 mV     |     |
|         | NtchInit40      |     | NtchInit40    |     | NtchInit40      |     | NtchInit40      |     | NtchInit40     |     |
|         | Q ≥ 30 ms       | 1   | Q ≥ 30 ms     | 1   | Q ≥ 30 ms       | 1   | Q ≥ 30 ms       | 1   | Q ≥ 30 ms      | 1   |
| V5      | R/Q ≤ 1         | 2   | R/Q ≤ 1       | 2   | R/Q ≤ 1         | 2   | R/Q ≤ 1         | 2   | R/Q ≤ 1        | 2   |
|         | R/S ≤ 1         |     | R/S ≤ 1       |     | R/S ≤ 1         |     | R/S ≤ 1         |     | R/S ≤ 1        |     |
|         | R/Q ≤ 2         | 1   | R/Q ≤ 2       | 1   | R/Q ≤ 2         | 1   | R/Q ≤ 2         | 1   | R/Q ≤ 2        | 1   |
| V6      | R/S ≤ 2         |     | R/S ≤ 15      |     | R/S ≤ 15        |     | R/S ≤ 2         |     | R/S ≤ 2        |     |
|         | R ≤ 0.6 mV      |     | R ≤ 0.6 mV    |     | R ≤ 0.6 mV      |     | R ≤ 0.6 mV      |     | R ≤ 0.6 mV     |     |
|         | NtchInit40      |     | NtchInit40    |     | NtchInit40      |     | NtchInit40      |     | NtchInit40     |     |
| V6      | Q ≥ 30 ms       | 1   | Q ≥ 30 ms     | 1   | Q ≥ 30 ms       | 1   | Q ≥ 30 ms       | 1   | Q ≥ 30 ms      | 1   |
|         | R/Q ≤ 1         | 2   | R/Q ≤ 1       | 2   | R/Q ≤ 1         | 2   | R/Q ≤ 1         | 2   | R/Q ≤ 1        | 2   |
|         | R/S ≤ 1         |     | R/S ≤ 1       |     | R/S ≤ 1         |     | R/S ≤ 1         |     | R/S ≤ 1        |     |
| Total   | R/Q ≤ 3         | 1   | R/Q ≤ 3       | 1   | R/Q ≤ 3         | 1   | R/Q ≤ 3         | 1   | R/Q ≤ 3        | 1   |
|         | R/S ≤ 3         |     | R/S ≤ 2       |     | R/S ≤ 2         |     | R/S ≤ 3         |     | R/S ≤ 3        |     |
|         | R ≤ 0.6 mV      |     | R ≤ 0.6 mV    |     | R ≤ 0.6 mV      |     | R ≤ 0.6 mV      |     | R ≤ 0.6 mV     |     |
| Total   | NtchInit40      |     | NtchInit40    |     | NtchInit40      |     | NtchInit40      |     | NtchInit40     |     |
|         | Points          |     | Points        |     | Points          |     | Points          |     | Points         | 9   |

| Lead | Criteria  | Pts |
|------|-----------|-----|
| I    | any Q     | 1   |
|      | R/Q ≤ 1   | 2   |
|      | R/S ≤ 1   |     |
| II   | R/Q ≤ 15  | 1   |
|      | R/S ≤ 15  |     |
|      | Q ≥ 40 ms | 2   |
| aVL  | Q ≥ 30 ms | 1   |
|      | R/Q ≤ 0.5 | 1   |
|      | R/S ≤ 0.5 |     |
| aVF  | Q ≥ 50 ms | 2   |
|      | Q ≥ 40 ms | 1   |
|      | R/Q ≤ 0.5 | 1   |
| V1   | R/S ≤ 0.5 | 2   |
|      | R/Q ≤ 0.5 |     |
|      | R/S ≤ 1   | 1   |
| aVF  | R/Q ≤ 1   | 1   |
|      | Q ≥ 50 ms | 2   |
|      | Q ≥ 40 ms | 1   |
| V1   | Q ≥ 40 ms | 1   |
|      | R/S ≤ 0.5 | 2   |
|      | R/Q ≤ 0.5 |     |
| aVF  | R/Q ≤ 1   | 1   |
|      | Q ≥ 50 ms | 2   |
|      | Q ≥ 40 ms | 1   |
| V1   | Q ≥ 40 ms | 1   |
|      | R/S ≤ 0.5 | 2   |
|      | R/Q ≤ 0.5 |     |
| aVF  | R/Q ≤ 1   | 1   |
|      | Q ≥ 50 ms | 2   |
|      | Q ≥ 40 ms | 1   |
| V1   | Q ≥ 40 ms | 1   |
|      | R/S ≤ 0.5 | 2   |
|      | R/Q ≤ 0.5 |     |
| aVF  | R/Q ≤ 1   | 1   |
|      | Q ≥ 50 ms | 2   |
|      | Q ≥ 40 ms | 1   |
| V1   | Q ≥ 40 ms | 1   |
|      | R/S ≤ 0.5 | 2   |
|      | R/Q ≤ 0.5 |     |
| aVF  | R/Q ≤ 1   | 1   |
|      | Q ≥ 50 ms | 2   |
|      | Q ≥ 40 ms | 1   |
| V1   | Q ≥ 40 ms | 1   |
|      | R/S ≤ 0.5 | 2   |
|      | R/Q ≤ 0.5 |     |
| aVF  | R/Q ≤ 1   | 1   |
|      | Q ≥ 50 ms | 2   |
|      | Q ≥ 40 ms | 1   |
| V1   | Q ≥ 40 ms | 1   |
|      | R/S ≤ 0.5 | 2   |
|      | R/Q ≤ 0.5 |     |
| aVF  | R/Q ≤ 1   | 1   |
|      | Q ≥ 50 ms | 2   |
|      | Q ≥ 40 ms | 1   |
| V1   | Q ≥ 40 ms | 1   |
|      | R/S ≤ 0.5 | 2   |
|      | R/Q ≤ 0.5 |     |
| aVF  | R/Q ≤ 1   | 1   |
|      | Q ≥ 50 ms | 2   |
|      | Q ≥ 40 ms | 1   |
| V1   | Q ≥ 40 ms | 1   |
|      | R/S ≤ 0.5 | 2   |
|      | R/Q ≤ 0.5 |     |
| aVF  | R/Q ≤ 1   | 1   |
|      | Q ≥ 50 ms | 2   |
|      | Q ≥ 40 ms | 1   |
| V1   | Q ≥ 40 ms | 1   |
|      | R/S ≤ 0.5 | 2   |
|      | R/Q ≤ 0.5 |     |
| aVF  | R/Q ≤ 1   | 1   |
|      | Q ≥ 50 ms | 2   |
|      | Q ≥ 40 ms | 1   |
| V1   | Q ≥ 40 ms | 1   |
|      | R/S ≤ 0.5 | 2   |
|      | R/Q ≤ 0.5 |     |
| aVF  | R/Q ≤ 1   | 1   |
|      | Q ≥ 50 ms | 2   |
|      | Q ≥ 40 ms | 1   |
| V1   | Q ≥ 40 ms | 1   |
|      | R/S ≤ 0.5 | 2   |
|      | R/Q ≤ 0.5 |     |
| aVF  | R/Q ≤ 1   | 1   |
|      | Q ≥ 50 ms | 2   |
|      | Q ≥ 40 ms | 1   |
| V1   | Q ≥ 40 ms | 1   |
|      | R/S ≤ 0.5 | 2   |
|      | R/Q ≤ 0.5 |     |
| aVF  | R/Q ≤ 1   | 1   |
|      | Q ≥ 50 ms | 2   |
|      | Q ≥ 40 ms | 1   |
| V1   | Q ≥ 40 ms | 1   |
|      | R/S ≤ 0.5 | 2   |
|      | R/Q ≤ 0.5 |     |
| aVF  | R/Q ≤ 1   | 1   |
|      | Q ≥ 50 ms | 2   |
|      | Q ≥ 40 ms | 1   |
| V1   | Q ≥ 40 ms | 1   |
|      | R/S ≤ 0.5 | 2   |
|      | R/Q ≤ 0.5 |     |
| aVF  | R/Q ≤ 1   | 1   |
|      | Q ≥ 50 ms | 2   |
|      | Q ≥ 40 ms | 1   |
| V1   | Q ≥ 40 ms | 1   |
|      | R/S ≤ 0.5 | 2   |
|      | R/Q ≤ 0.5 |     |
| aVF  | R/Q ≤ 1   | 1   |
|      | Q ≥ 50 ms | 2   |
|      | Q ≥ 40 ms | 1   |
| V1   | Q ≥ 40 ms | 1   |
|      | R/S ≤ 0.5 | 2   |
|      | R/Q ≤ 0.5 |     |
| aVF  | R/Q ≤ 1   | 1   |
|      | Q ≥ 50 ms | 2   |
|      | Q ≥ 40 ms | 1   |
| V1   | Q ≥ 40 ms | 1   |
|      | R/S ≤ 0.5 | 2   |
|      | R/Q ≤ 0.5 |     |
| aVF  | R/Q ≤ 1   | 1   |
|      | Q ≥ 50 ms | 2   |
|      | Q ≥ 40 ms | 1   |
| V1   | Q ≥ 40 ms | 1   |
|      | R/S ≤ 0.5 | 2   |
|      | R/Q ≤ 0.5 |     |
| aVF  | R/Q ≤ 1   | 1   |
|      | Q ≥ 50 ms | 2   |
|      | Q ≥ 40 ms | 1   |
| V1   | Q ≥ 40 ms | 1   |
|      | R/S ≤ 0.5 | 2   |
|      | R/Q ≤ 0.5 |     |
| aVF  | R/Q ≤ 1   | 1   |
|      | Q ≥ 50 ms | 2   |
|      | Q ≥ 40 ms | 1   |
| V1   | Q ≥ 40 ms | 1   |
|      | R/S ≤ 0.5 | 2   |
|      | R/Q ≤ 0.5 |     |
| aVF  | R/Q ≤ 1   | 1   |
|      | Q ≥ 50 ms | 2   |
|      | Q ≥ 40 ms | 1   |
| V1   | Q ≥ 40 ms | 1   |
|      | R/S ≤ 0.5 | 2   |
|      | R/Q ≤ 0.5 |     |
| aVF  | R/Q ≤ 1   | 1   |
|      | Q ≥ 50 ms | 2   |
|      | Q ≥ 40 ms | 1   |
| V1   | Q ≥ 40 ms | 1   |
|      | R/S ≤ 0.5 | 2   |
|      | R/Q ≤ 0.5 |     |
| aVF  | R/Q ≤ 1   | 1   |
|      | Q ≥ 50 ms | 2   |
|      | Q ≥ 40 ms | 1   |
| V1   | Q ≥ 40 ms | 1   |
|      | R/S ≤ 0.5 | 2   |
|      | R/Q ≤ 0.5 |     |
| aVF  | R/Q ≤ 1   | 1   |
|      | Q ≥ 50 ms | 2   |
|      | Q ≥ 40 ms | 1   |
| V1   | Q ≥ 40 ms | 1   |
|      | R/S ≤ 0.5 | 2   |
|      | R/Q ≤ 0.5 |     |
| aVF  | R/Q ≤ 1   | 1   |
|      | Q ≥ 50 ms | 2   |
|      | Q ≥ 40 ms | 1   |
| V1   | Q ≥ 40 ms | 1   |
|      | R/S ≤ 0.5 | 2   |
|      | R/Q ≤ 0.5 |     |
| aVF  | R/Q ≤ 1   | 1   |
|      | Q ≥ 50 ms | 2   |
|      | Q ≥ 40 ms | 1   |
| V1   | Q ≥ 40 ms | 1   |
|      | R/S ≤ 0.5 | 2   |
|      | R/Q ≤ 0.5 |     |
| aVF  | R/Q ≤ 1   | 1   |
|      | Q ≥ 50 ms | 2   |
|      | Q ≥ 40 ms | 1   |
| V1   | Q ≥ 40 ms | 1   |
|      | R/S ≤ 0.5 | 2   |
|      | R/Q ≤ 0.5 |     |
| aVF  | R/Q ≤ 1   | 1   |
|      | Q ≥ 50 ms | 2   |
|      | Q ≥ 40 ms | 1   |
| V1   | Q ≥ 40 ms | 1   |
|      | R/S ≤ 0.5 | 2   |
|      | R/Q ≤ 0.5 |     |
| aVF  | R/Q ≤ 1   | 1   |
|      | Q ≥ 50 ms | 2   |
|      | Q ≥ 40 ms | 1   |
| V1   | Q ≥ 40 ms | 1   |
|      | R/S ≤ 0.5 | 2   |
|      | R/Q ≤ 0.5 |     |
| aVF  | R/Q ≤ 1   | 1   |
|      | Q ≥ 50 ms | 2   |
|      | Q ≥ 40 ms | 1   |
| V1   | Q ≥ 40 ms | 1   |
|      | R/S ≤ 0.5 | 2   |
|      | R/Q ≤ 0.5 |     |
| aVF  | R/Q ≤ 1   | 1   |
|      | Q ≥ 50 ms | 2   |
|      | Q ≥ 40 ms | 1   |
| V1   | Q ≥ 40 ms | 1   |
|      | R/S ≤ 0.5 | 2   |
|      | R/Q ≤ 0.5 |     |
| aVF  | R/Q ≤ 1   | 1   |
|      | Q ≥ 50 ms | 2   |
|      | Q ≥ 40 ms | 1   |
| V1   | Q ≥ 40 ms | 1   |
|      | R/S ≤ 0.5 | 2   |
|      | R/Q ≤ 0.5 |     |
| aVF  | R/Q ≤ 1   | 1   |
|      | Q ≥ 50 ms | 2   |
|      | Q ≥ 40 ms | 1   |
| V1   | Q ≥ 40 ms | 1   |
|      | R/S ≤ 0.5 | 2   |
|      | R/Q ≤ 0.5 |     |

|                         |         |                               |       |                              |                 |
|-------------------------|---------|-------------------------------|-------|------------------------------|-----------------|
| <b>Patient ID:</b>      | 08      | <b>QRS Duration:</b>          | 162ms | <b>Amplitude Adjustment:</b> | +1%             |
| <b>Age &amp; Sex:</b>   | 54 Male | <b>QRS Axis:</b>              | +112° | <b>Duration Adjustment:</b>  | 0%              |
| <b>Conduction Type:</b> | RBBB    | <b>Right Atrial Overload:</b> | No    | <b>Total Points</b>          | 17 points (51%) |

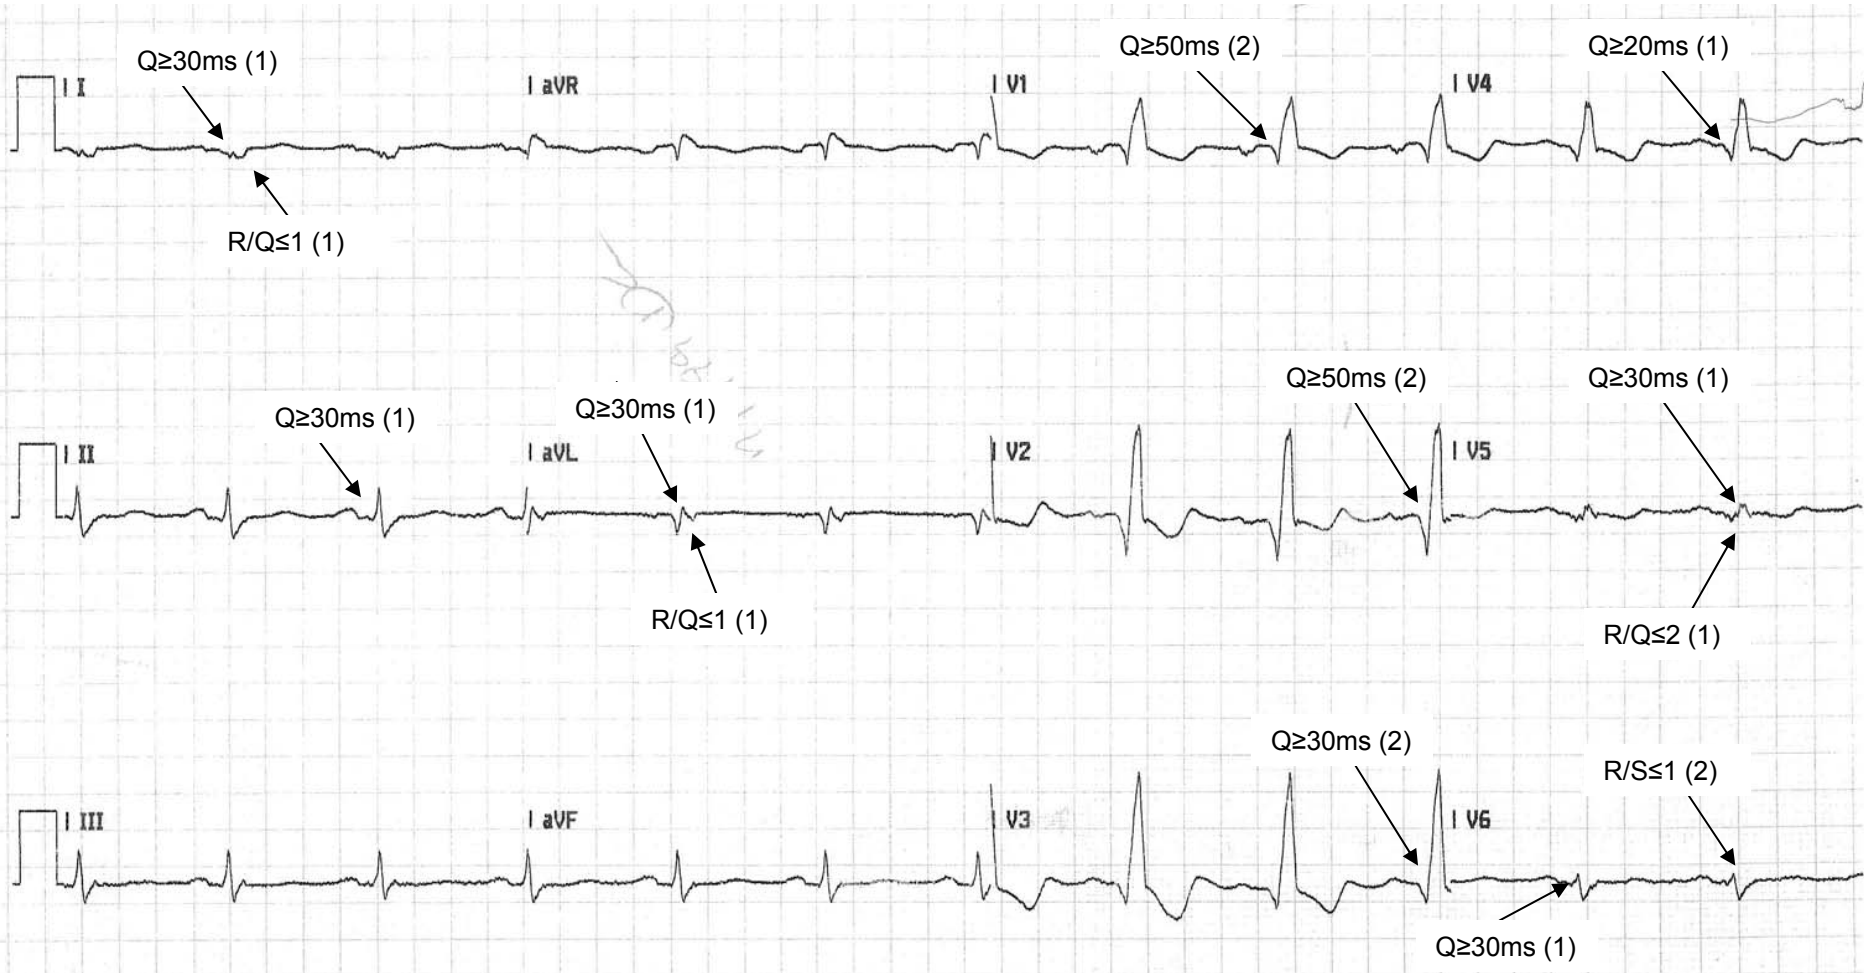

QRS Scoring

Patient ID 08

QRS duration 162ms

Amplitude adjust +1%  
(↑1%/yr age 20-54; ↓1%/yr >55 yrs; ↓ 10% for females)

Age & gender 54 Male

QRS axis +112°

Duration adjust 0% RAO(\*\*, \*\*\*) Yes/No  
(↓ 10% for females)

| Lead    | RBBB                                                                                  |                                 | LAFB                                                                                  |                                 | LAFB + RBBB                                                                           |                                 | LVH                                                                                   |                                 | No Confounders                                                                        |                                 |
|---------|---------------------------------------------------------------------------------------|---------------------------------|---------------------------------------------------------------------------------------|---------------------------------|---------------------------------------------------------------------------------------|---------------------------------|---------------------------------------------------------------------------------------|---------------------------------|---------------------------------------------------------------------------------------|---------------------------------|
|         | Criteria                                                                              | Pts                             |
| I       | Q ≥ 30 ms<br>R/Q ≤ 1<br>R ≤ 0.2 mV                                                    | 1<br>1<br>1                     | Q ≥ 30 ms<br>R/Q ≤ 1<br>R ≤ 0.2 mV                                                    | 1<br>1<br>1                     | Q ≥ 30 ms<br>R/Q ≤ 1<br>R ≤ 0.2 mV                                                    | 1<br>1<br>1                     | Q ≥ 30 ms<br>R/Q ≤ 1<br>R ≤ 0.2 mV                                                    | 1<br>1<br>1                     | Q ≥ 30 ms<br>R/Q ≤ 1<br>R ≤ 0.2 mV                                                    | 1<br>1<br>1                     |
| II      | Q ≥ 40 ms<br>Q ≥ 30 ms                                                                | 2<br>1                          | Q ≥ 40 ms<br>Q ≥ 30 ms                                                                | 2<br>1                          | Q ≥ 40 ms<br>Q ≥ 30 ms                                                                | 2<br>1                          | Q ≥ 40 ms<br>Q ≥ 30 ms                                                                | 2<br>1                          | Q ≥ 40 ms<br>Q ≥ 30 ms                                                                | 2<br>1                          |
| aVL     | Q ≥ 30 ms<br>R/Q ≤ 1                                                                  | 1<br>1                          | Q ≥ 40 ms<br>R/Q ≤ 1                                                                  | 1<br>1                          | Q ≥ 40 ms<br>R/Q ≤ 1                                                                  | 1<br>1                          | Q ≥ 40 ms<br>R/Q ≤ 1                                                                  | 1<br>1                          | Q ≥ 30 ms<br>R/Q ≤ 1                                                                  | 1<br>1                          |
| aVF     | Q ≥ 50 ms<br>Q ≥ 40 ms<br>Q ≥ 30 ms<br>R/Q ≤ 1<br>R/Q ≤ 2                             | 3<br>2<br>1<br>2<br>1           | Q ≥ 50 ms<br>Q ≥ 40 ms<br>Q ≥ 30 ms<br>R/Q ≤ 1<br>R/Q ≤ 2                             | 3<br>2<br>1<br>2<br>1           | Q ≥ 50 ms<br>Q ≥ 40 ms<br>Q ≥ 30 ms<br>R/Q ≤ 1<br>R/Q ≤ 2                             | 3<br>2<br>1<br>2<br>1           | Q ≥ 60 ms<br>Q ≥ 50 ms<br>Q ≥ 40 ms<br>R/Q ≤ 1<br>R/Q ≤ 2                             | 3<br>2<br>1<br>2<br>1           | Q ≥ 50 ms<br>Q ≥ 40 ms<br>Q ≥ 30 ms<br>R/Q ≤ 1<br>R/Q ≤ 2                             | 3<br>2<br>1<br>2<br>1           |
| V1      | Q ≥ 50 ms                                                                             | 2                               |                                                                                       |                                 | Q ≥ 50 ms                                                                             | 2                               | any QR<br>(or any Q if *)<br>NtchInit40                                               | 1                               | any Q                                                                                 | 1                               |
| Ant.    | any Q<br>Init R ≤ 20 ms                                                               | 1<br>1                          | any QR                                                                                | 1                               | any Q                                                                                 | 1                               |                                                                                       |                                 | any Q                                                                                 | 1                               |
| V1      |                                                                                       |                                 | R/S ≥ 1                                                                               | 1                               |
| Post.** | Init R ≥ 60 ms<br>Init R ≥ 15 mV<br>Init R ≥ 50 ms<br>Init R ≥ 10 mV                  | 2<br>1<br>1<br>1                | R ≥ 50 ms<br>R ≥ 1mV<br>R ≥ 40 ms<br>R ≥ 0.7 mV                                       | 2<br>1<br>1<br>1                | Init R ≥ 60 ms<br>Init R ≥ 15 mV<br>Init R ≥ 50 ms<br>Init R ≥ 10 mV                  | 2<br>1<br>1<br>1                | R ≥ 50 ms<br>R ≥ 1mV<br>R ≥ 40 ms<br>R ≥ 0.7 mV                                       | 2<br>1<br>1<br>1                | R ≥ 50 ms<br>R ≥ 1mV<br>R ≥ 40 ms<br>R ≥ 0.7 mV                                       | 2<br>1<br>1<br>1                |
| V2      | Q ≥ 50 ms                                                                             | 2                               | Qs0.2&Ss0.2mV                                                                         | 1                               | Q ≥ 50 ms                                                                             | 2                               | Qs0.2&Ss0.2 mV                                                                        | 1                               | Qs0.2&Ss0.2mV                                                                         | 1                               |
| Ant.    | any Q<br>R ≤ 10 ms<br>R ≤ 0.1mV                                                       | 1<br>1<br>1                     | any QR<br>R ≤ 10 ms<br>R ≤ 0.1mV                                                      | 1<br>1<br>1                     | any Q<br>R ≤ 10 ms<br>R ≤ 0.1mV                                                       | 1<br>1<br>1                     | any QR<br>(or any Q if *)<br>NtchInit40                                               | 1                               | any Q<br>R ≤ 10 ms<br>R ≤ 0.1mV                                                       | 1<br>1<br>1                     |
| V2      |                                                                                       |                                 | R/S ≥ 15                                                                              | 1                               |
| Post.** | Init R ≥ 70 ms<br>Init R ≥ 2.5 mV<br>Init R ≥ 50 ms<br>Init R ≥ 2.0 mV                | 2<br>1<br>1<br>1                | R ≥ 60 ms<br>R ≥ 2 mV<br>R ≥ 50 ms<br>R ≥ 15 mV                                       | 2<br>1<br>1<br>1                | Init R ≥ 70 ms<br>Init R ≥ 2.5 mV<br>Init R ≥ 50 ms<br>Init R ≥ 2.0 mV                | 2<br>1<br>1<br>1                | R ≥ 60 ms<br>R ≥ 2 mV<br>R ≥ 50 ms<br>R ≥ 15 mV                                       | 2<br>1<br>1<br>1                | R ≥ 60 ms<br>R ≥ 2 mV<br>R ≥ 50 ms<br>R ≥ 15 mV                                       | 2<br>1<br>1<br>1                |
| V3      | Q ≥ 30 ms<br>R ≤ 10 ms<br>Q ≥ 20 ms<br>R ≤ 20 ms                                      | 2<br>1<br>1<br>1                | Q ≥ 30 ms<br>R ≤ 10 ms<br>Q ≥ 20 ms<br>R ≤ 20 ms                                      | 2<br>1<br>1<br>1                | Q ≥ 30 ms<br>R ≤ 10 ms<br>Q ≥ 20 ms<br>R ≤ 20 ms                                      | 2<br>1<br>1<br>1                | QR&(Q ≥ 30 ms)<br>NtchInit40<br>any QR<br>(or any Q if *)                             | 2<br>1<br>1<br>1                | Q ≥ 30 ms<br>R ≤ 10 ms<br>Q ≥ 20 ms<br>R ≤ 20 ms                                      | 2<br>1<br>1<br>1                |
| V4      | Q ≥ 20 ms<br>R/Q ≤ 0.5<br>R/S ≤ 0.5<br>R/Q ≤ 1<br>R/S ≤ 1<br>R ≤ 0.5 mV<br>NtchInit40 | 1<br>2<br>1<br>1<br>1<br>1<br>1 | Q ≥ 20 ms<br>R/Q ≤ 0.5<br>R/S ≤ 0.5<br>R/Q ≤ 1<br>R/S ≤ 1<br>R ≤ 0.5 mV<br>NtchInit40 | 1<br>2<br>1<br>1<br>1<br>1<br>1 | Q ≥ 20 ms<br>R/Q ≤ 0.5<br>R/S ≤ 0.5<br>R/Q ≤ 1<br>R/S ≤ 1<br>R ≤ 0.5 mV<br>NtchInit40 | 1<br>2<br>1<br>1<br>1<br>1<br>1 | Q ≥ 20 ms<br>R/Q ≤ 0.5<br>R/S ≤ 0.5<br>R/Q ≤ 1<br>R/S ≤ 1<br>R ≤ 0.5 mV<br>NtchInit40 | 1<br>2<br>1<br>1<br>1<br>1<br>1 | Q ≥ 20 ms<br>R/Q ≤ 0.5<br>R/S ≤ 0.5<br>R/Q ≤ 1<br>R/S ≤ 1<br>R ≤ 0.5 mV<br>NtchInit40 | 1<br>2<br>1<br>1<br>1<br>1<br>1 |
| V5      | Q ≥ 30 ms<br>R/Q ≤ 1<br>R/S ≤ 1<br>R/Q ≤ 2<br>R/S ≤ 2<br>R ≤ 0.6 mV<br>NtchInit40     | 1<br>2<br>1<br>1<br>1<br>1<br>1 | Q ≥ 30 ms<br>R/Q ≤ 1<br>R/S ≤ 1<br>R/Q ≤ 2<br>R/S ≤ 15                                | 1<br>2<br>1<br>1<br>1           | Q ≥ 30 ms<br>R/Q ≤ 1<br>R/S ≤ 1<br>R/Q ≤ 2<br>R/S ≤ 15                                | 1<br>2<br>1<br>1<br>1           | Q ≥ 30 ms<br>R/Q ≤ 1<br>R/S ≤ 1<br>R/Q ≤ 2<br>R/S ≤ 2                                 | 1<br>2<br>1<br>1<br>1           | Q ≥ 30 ms<br>R/Q ≤ 1<br>R/S ≤ 1<br>R/Q ≤ 2<br>R/S ≤ 2                                 | 1<br>2<br>1<br>1<br>1           |
| V6      | Q ≥ 30 ms<br>R/Q ≤ 1<br>R/S ≤ 1<br>R/Q ≤ 3<br>R/S ≤ 3<br>R ≤ 0.6 mV<br>NtchInit40     | 1<br>2<br>1<br>1<br>1<br>1<br>1 | Q ≥ 30 ms<br>R/Q ≤ 1<br>R/S ≤ 1<br>R/Q ≤ 3<br>R/S ≤ 2                                 | 1<br>2<br>1<br>1<br>1           | Q ≥ 30 ms<br>R/Q ≤ 1<br>R/S ≤ 1<br>R/Q ≤ 3<br>R/S ≤ 2                                 | 1<br>2<br>1<br>1<br>1           | Q ≥ 30 ms<br>R/Q ≤ 1<br>R/S ≤ 1<br>R/Q ≤ 3<br>R/S ≤ 3                                 | 1<br>2<br>1<br>1<br>1           | Q ≥ 30 ms<br>R/Q ≤ 1<br>R/S ≤ 1<br>R/Q ≤ 3<br>R/S ≤ 3                                 | 1<br>2<br>1<br>1<br>1           |
| Total   | Points                                                                                | 17                              | Points                                                                                |                                 | Points                                                                                |                                 | Points                                                                                |                                 | Points                                                                                |                                 |

%LV infarct 51 (3 x #pts)    %LV infarct \_\_\_\_\_ (3 x #pts)

| Lead    | LBBB                                                   |                       |
|---------|--------------------------------------------------------|-----------------------|
|         | Criteria                                               | Pts                   |
| I       | any Q<br>R/Q ≤ 1<br>R/S ≤ 1                            | 1<br>2<br>1           |
| II      | Q ≥ 40 ms<br>Q ≥ 30 ms                                 | 2<br>1                |
| aVL     | Q ≥ 50 ms<br>Q ≥ 40 ms<br>R/S ≤ 0.5                    | 2<br>1<br>1           |
| aVF     | Q ≥ 50 ms<br>Q ≥ 40 ms<br>R/S ≤ 0.5                    | 2<br>1<br>1           |
| V1      | NchInit40                                              | 1                     |
| Ant.*** | R ≥ 0.3 mV<br>R ≥ 30 ms<br>R ≥ 0.2 mV<br>R ≥ 20 ms     | 2<br>1<br>1<br>1      |
| V1      | S/S' ≥ 2.0                                             | 3                     |
| Post    | S/S' ≥ 15                                              | 2                     |
| V2      | NchInit40                                              | 1                     |
| Ant.*** | R ≥ 0.4 mV<br>R ≥ 30 ms<br>R ≥ 0.3 mV<br>R ≥ 20 ms     | 2<br>1<br>1<br>1      |
| V2      | S/S' ≥ 2.5                                             | 3                     |
| Post    | S/S' ≥ 2.0<br>S/S' ≥ 15                                | 2<br>1                |
| V5      | any Q<br>R/R' ≥ 2<br>R/R' ≥ 1<br>R/S ≤ 2<br>R ≤ 0.5 mV | 1<br>2<br>1<br>1<br>1 |
| V6      | Q ≥ 20 ms<br>R/R' ≥ 2<br>R/R' ≥ 1<br>R/S ≤ 2           | 1<br>2<br>1<br>1      |
| Total   | Points                                                 |                       |

%LV infarct \_\_\_\_\_  
(3 #pts)

\* (for LVH) if ≥4 other points in leads I, aVL, V4, V5 or V6 then count QS in V1-V3

\*\* (RAO) if P positive amp in V1 ≥ 0.1mV or aVF P ≥ 0.175 mV, then exclude V1-V2 R-criteria points

\*\*\* (RAO) if P positive amp in V1 ≥ 0.1mV or aVF P ≥ 0.175 mV, then exclude V1-V2 R-criteria points



|                         |         |                               |       |                              |                 |
|-------------------------|---------|-------------------------------|-------|------------------------------|-----------------|
| <b>Patient ID:</b>      | 09      | <b>QRS Duration:</b>          | 114ms | <b>Amplitude Adjustment:</b> | +1%             |
| <b>Age &amp; Sex:</b>   | 54 Male | <b>QRS Axis:</b>              | 204°  | <b>Duration Adjustment:</b>  | 0%              |
| <b>Conduction Type:</b> | LAFB    | <b>Right Atrial Overload:</b> | No    | <b>Total Points</b>          | 17 points (51%) |

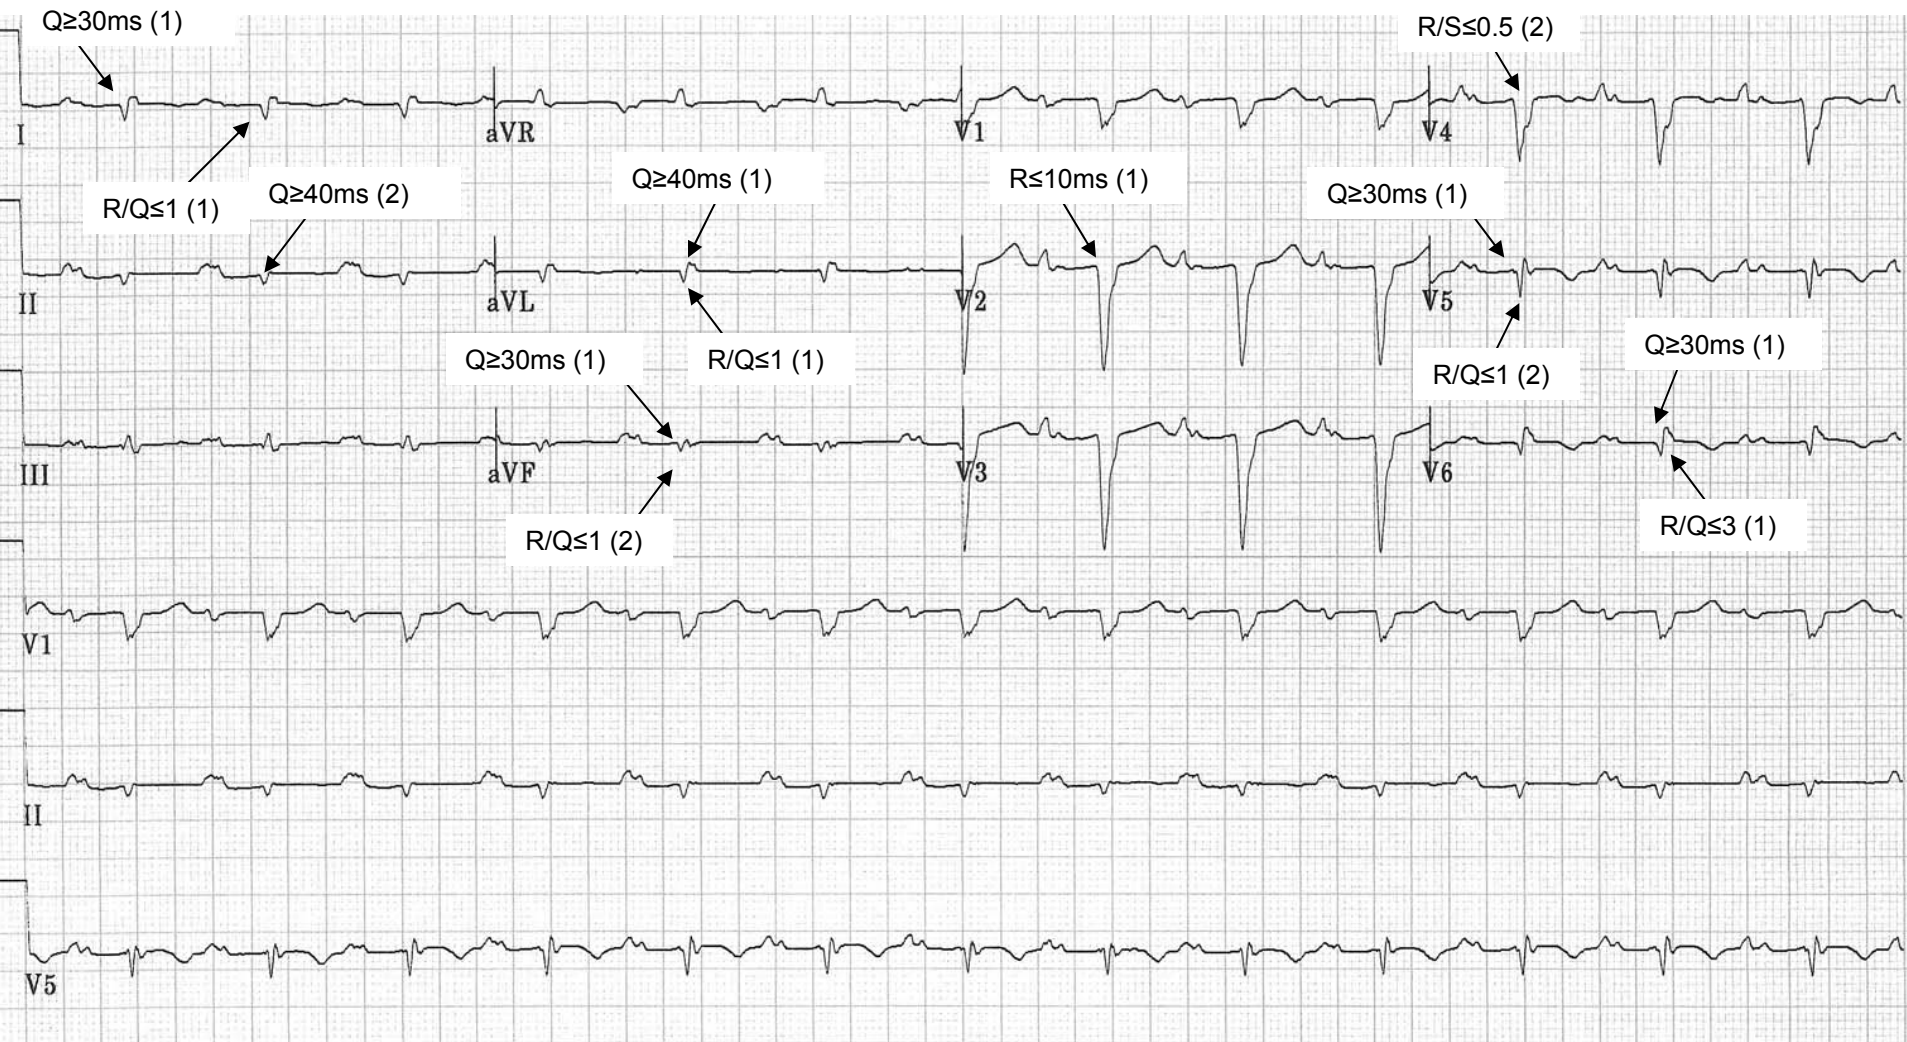

QRS Scoring

Patient ID 09 QRS duration 114ms Amplitude adjust +1%  
 (↑1%/yr age 20-54; ↓1%/yr >55 yrs; ↓ 10% for females)

Age & gender 54 Male QRS axis 204° Duration adjust 0% RAO(\*\*, \*\*\*)Yes/No  
 (↓ 10% for females)

| Lead    | RBBB            |     | LAFB          |     | LAFB + RBBB     |     | LVH             |     | No Confounders |     |
|---------|-----------------|-----|---------------|-----|-----------------|-----|-----------------|-----|----------------|-----|
|         | Criteria        | Pts | Criteria      | Pts | Criteria        | Pts | Criteria        | Pts | Criteria       | Pts |
| I       | Q ≥ 30 ms       | 1   | Q ≥ 30 ms     | 1   | Q ≥ 30 ms       | 1   | Q ≥ 30 ms       | 1   | Q ≥ 30 ms      | 1   |
|         | R/Q ≤ 1         | 1   | R/Q ≤ 1       | 1   | R/Q ≤ 1         | 1   | R/Q ≤ 1         | 1   | R/Q ≤ 1        | 1   |
|         | R ≤ 0.2 mV      | 1   | R ≤ 0.2 mV    | 1   | R ≤ 0.2 mV      | 1   | R ≤ 0.2 mV      | 1   | R ≤ 0.2 mV     | 1   |
| II      | Q ≥ 40 ms       | 2   | Q ≥ 40 ms     | 2   | Q ≥ 40 ms       | 2   | Q ≥ 40 ms       | 2   | Q ≥ 40 ms      | 2   |
|         | Q ≥ 30 ms       | 1   | Q ≥ 30 ms     | 1   | Q ≥ 30 ms       | 1   | Q ≥ 30 ms       | 1   | Q ≥ 30 ms      | 1   |
|         | R/Q ≤ 1         | 1   | R/Q ≤ 1       | 1   | R/Q ≤ 1         | 1   | R/Q ≤ 1         | 1   | R/Q ≤ 1        | 1   |
| aVL     | Q ≥ 30 ms       | 1   | Q ≥ 40 ms     | 1   | Q ≥ 40 ms       | 1   | Q ≥ 40 ms       | 1   | Q ≥ 30 ms      | 1   |
|         | R/Q ≤ 1         | 1   | R/Q ≤ 1       | 1   | R/Q ≤ 1         | 1   | R/Q ≤ 1         | 1   | R/Q ≤ 1        | 1   |
|         | R/S ≤ 1         | 1   | R/S ≤ 1       | 1   | R/S ≤ 1         | 1   | R/S ≤ 1         | 1   | R/S ≤ 1        | 1   |
| aVF     | Q ≥ 50 ms       | 3   | Q ≥ 50 ms     | 3   | Q ≥ 50 ms       | 3   | Q ≥ 60 ms       | 3   | Q ≥ 50 ms      | 3   |
|         | Q ≥ 40 ms       | 2   | Q ≥ 40 ms     | 2   | Q ≥ 40 ms       | 2   | Q ≥ 50 ms       | 2   | Q ≥ 40 ms      | 2   |
|         | Q ≥ 30 ms       | 1   | Q ≥ 30 ms     | 1   | Q ≥ 30 ms       | 1   | Q ≥ 40 ms       | 1   | Q ≥ 30 ms      | 1   |
| V1      | R/Q ≤ 1         | 2   | R/Q ≤ 1       | 2   | R/Q ≤ 1         | 2   | R/Q ≤ 1         | 2   | R/Q ≤ 1        | 2   |
|         | R/Q ≤ 2         | 1   | R/Q ≤ 2       | 1   | R/Q ≤ 2         | 1   | R/Q ≤ 2         | 1   | R/Q ≤ 2        | 1   |
|         | Q ≥ 50 ms       | 2   | Q ≥ 50 ms     | 2   | Q ≥ 50 ms       | 2   | any QR          | 2   | any QR         | 2   |
| Ant.    | any Q           | 1   | any QR        | 1   | any Q           | 1   | (or any Q if *) | 1   | any Q          | 1   |
|         | Init R ≤ 2.0 mV | 1   | any QR        | 1   | any Q           | 1   | NtchInit40      | 1   | any Q          | 1   |
|         | Init R ≥ 60 ms  | 2   | R/S ≥ 1       | 1   | R/S ≥ 1         | 1   | R/S ≥ 1         | 1   | R/S ≥ 1        | 1   |
| Post.** | Init R ≥ 15 mV  | 2   | R ≥ 50 ms     | 2   | Init R ≥ 60 ms  | 2   | R ≥ 50 ms       | 2   | R ≥ 50 ms      | 2   |
|         | Init R ≥ 50 ms  | 1   | R ≥ 40 ms     | 1   | Init R ≥ 15 mV  | 1   | R ≥ 1mV         | 1   | R ≥ 1mV        | 1   |
|         | Init R ≥ 10 mV  | 1   | R ≥ 0.7 mV    | 1   | Init R ≥ 50 ms  | 1   | R ≥ 40 ms       | 1   | R ≥ 40 ms      | 1   |
| V2      | Q ≥ 50 ms       | 2   | Qs0.2&Ss0.2mV | 1   | Q ≥ 50 ms       | 2   | Qs0.2&Ss0.2 mV  | 1   | Qs0.2&Ss0.2mV  | 1   |
|         | any Q           | 1   | any QR        | 1   | any Q           | 1   | any QR          | 1   | any Q          | 1   |
|         | R ≤ 10 ms       | 1   | R ≤ 10 ms     | 1   | R ≤ 10 ms       | 1   | (or any Q if *) | 1   | R ≤ 10 ms      | 1   |
| Post.** | Init R ≥ 70 ms  | 2   | R/S ≥ 15      | 1   | R/S ≥ 15        | 1   | R/S ≥ 15        | 1   | R/S ≥ 15       | 1   |
|         | Init R ≥ 2.5 mV | 1   | R ≥ 2 mV      | 1   | Init R ≥ 2.5 mV | 1   | R ≥ 2 mV        | 1   | R ≥ 2 mV       | 1   |
|         | Init R ≥ 2.0 mV | 1   | R ≥ 15 mV     | 1   | Init R ≥ 50 ms  | 1   | R ≥ 50 ms       | 1   | R ≥ 50 ms      | 1   |
| V3      | Q ≥ 30 ms       | 2   | Q ≥ 30 ms     | 2   | Q ≥ 30 ms       | 2   | QR&(Q ≥ 30 ms)  | 2   | Q ≥ 30 ms      | 2   |
|         | R ≤ 10 ms       | 1   | R ≤ 10 ms     | 1   | R ≤ 10 ms       | 1   | NtchInit40      | 1   | R ≤ 10 ms      | 1   |
|         | Q ≥ 20 ms       | 1   | Q ≥ 20 ms     | 1   | Q ≥ 20 ms       | 1   | any QR          | 1   | Q ≥ 20 ms      | 1   |
| V4      | Q ≥ 20 ms       | 1   | Q ≥ 20 ms     | 1   | Q ≥ 20 ms       | 1   | Q ≥ 20 ms       | 1   | Q ≥ 20 ms      | 1   |
|         | R/Q ≤ 0.5       | 2   | R/Q ≤ 0.5     | 2   | R/Q ≤ 0.5       | 2   | R/Q ≤ 0.5       | 2   | R/Q ≤ 0.5      | 2   |
|         | R/S ≤ 0.5       | 1   | R/S ≤ 0.5     | 1   | R/S ≤ 0.5       | 1   | R/S ≤ 0.5       | 1   | R/S ≤ 0.5      | 1   |
| V5      | R/Q ≤ 1         | 1   | R/Q ≤ 1       | 1   | R/Q ≤ 1         | 1   | R/Q ≤ 1         | 1   | R/Q ≤ 1        | 1   |
|         | R/S ≤ 1         | 1   | R/S ≤ 1       | 1   | R/S ≤ 1         | 1   | R/S ≤ 1         | 1   | R/S ≤ 1        | 1   |
|         | R ≤ 0.5 mV      | 1   | R ≤ 0.5 mV    | 1   | R ≤ 0.5 mV      | 1   | R ≤ 0.5 mV      | 1   | R ≤ 0.5 mV     | 1   |
| V6      | Q ≥ 30 ms       | 1   | Q ≥ 30 ms     | 1   | Q ≥ 30 ms       | 1   | Q ≥ 30 ms       | 1   | Q ≥ 30 ms      | 1   |
|         | R/Q ≤ 1         | 2   | R/Q ≤ 1       | 2   | R/Q ≤ 1         | 2   | R/Q ≤ 1         | 2   | R/Q ≤ 1        | 2   |
|         | R/S ≤ 1         | 1   | R/S ≤ 1       | 1   | R/S ≤ 1         | 1   | R/S ≤ 1         | 1   | R/S ≤ 1        | 1   |
| Total   | Points          |     | Points        | 17  | Points          |     | Points          |     | Points         |     |

| Lead       | LBBB       |     |
|------------|------------|-----|
|            | Criteria   | Pts |
| I          | any Q      | 1   |
|            | R/Q ≤ 1    | 2   |
|            | R/S ≤ 1    | 1   |
| II         | R/Q ≤ 15   | 1   |
|            | R/S ≤ 15   | 1   |
|            | Q ≥ 40 ms  | 2   |
| aVL        | Q ≥ 30 ms  | 1   |
|            | R/Q ≤ 0.5  | 1   |
|            | R/S ≤ 0.5  | 1   |
| aVF        | Q ≥ 50 ms  | 2   |
|            | Q ≥ 40 ms  | 1   |
|            | R/Q ≤ 0.5  | 1   |
| V1         | R/S ≤ 0.5  | 2   |
|            | R/Q ≤ 0.5  | 1   |
|            | R/S ≤ 1    | 1   |
| Ant.***    | R/S ≤ 1    | 1   |
|            | R/Q ≤ 1    | 1   |
|            | R/S ≤ 1    | 1   |
| V1 Post    | R ≥ 0.3 mV | 2   |
|            | R ≥ 30 ms  | 1   |
|            | R ≥ 0.2 mV | 1   |
| V1 Ant.*** | R ≥ 20 ms  | 1   |
|            | S/S' ≥ 2.0 | 3   |
|            | S/S' ≥ 1.5 | 2   |
| V2 Post    | S/S' ≥ 125 | 1   |
|            | NchInit40  | 1   |
|            | R ≥ 0.4 mV | 2   |
| V2 Ant.*** | R ≥ 30 ms  | 1   |
|            | R ≥ 0.3 mV | 1   |
|            | R ≥ 20 ms  | 1   |
| V2 Post    | S/S' ≥ 2.5 | 3   |
|            | S/S' ≥ 2.0 | 2   |
|            | S/S' ≥ 1.5 | 1   |
| V5         | any Q      | 1   |
|            | R/R' ≥ 2   | 2   |
|            | R/R' ≥ 1   | 1   |
| V6         | R/S ≤ 2    | 1   |
|            | R/S ≤ 2    | 1   |
|            | R/S ≤ 2    | 1   |
| Total      | Points     |     |

%LV infarct       
 (3 \* #pts)

%LV infarct         %LV infarct 51    %LV infarct         %LV infarct         %LV infarct       
 (3 x #pts)                      (3 x #pts)                      (3 x #pts)                      (3 x #pts)

\* (for LVH) if ≥4 other points in leads I, aVL, V4, V5 or V6 then count QS in V1-V3  
 \*\* (RAO) if P positive amp in V1 ≥ 0.1mV or aVF P ≥ 0.175 mV, then exclude V1-V2 R-criteria points  
 \*\*\* (RAO) if P positive amp in V1 ≥ 0.1mV or aVF P ≥ 0.175 mV, then exclude V1-V2 R-criteria points

|                         |         |                               |      |                              |               |
|-------------------------|---------|-------------------------------|------|------------------------------|---------------|
| <b>Patient ID:</b>      | 10      | <b>QRS Duration:</b>          | 92ms | <b>Amplitude Adjustment:</b> | +4%           |
| <b>Age &amp; Sex:</b>   | 51 Male | <b>QRS Axis:</b>              | +33° | <b>Duration Adjustment:</b>  | 0%            |
| <b>Conduction Type:</b> | LVH     | <b>Right Atrial Overload:</b> | No   | <b>Total Points</b>          | 3 points (9%) |

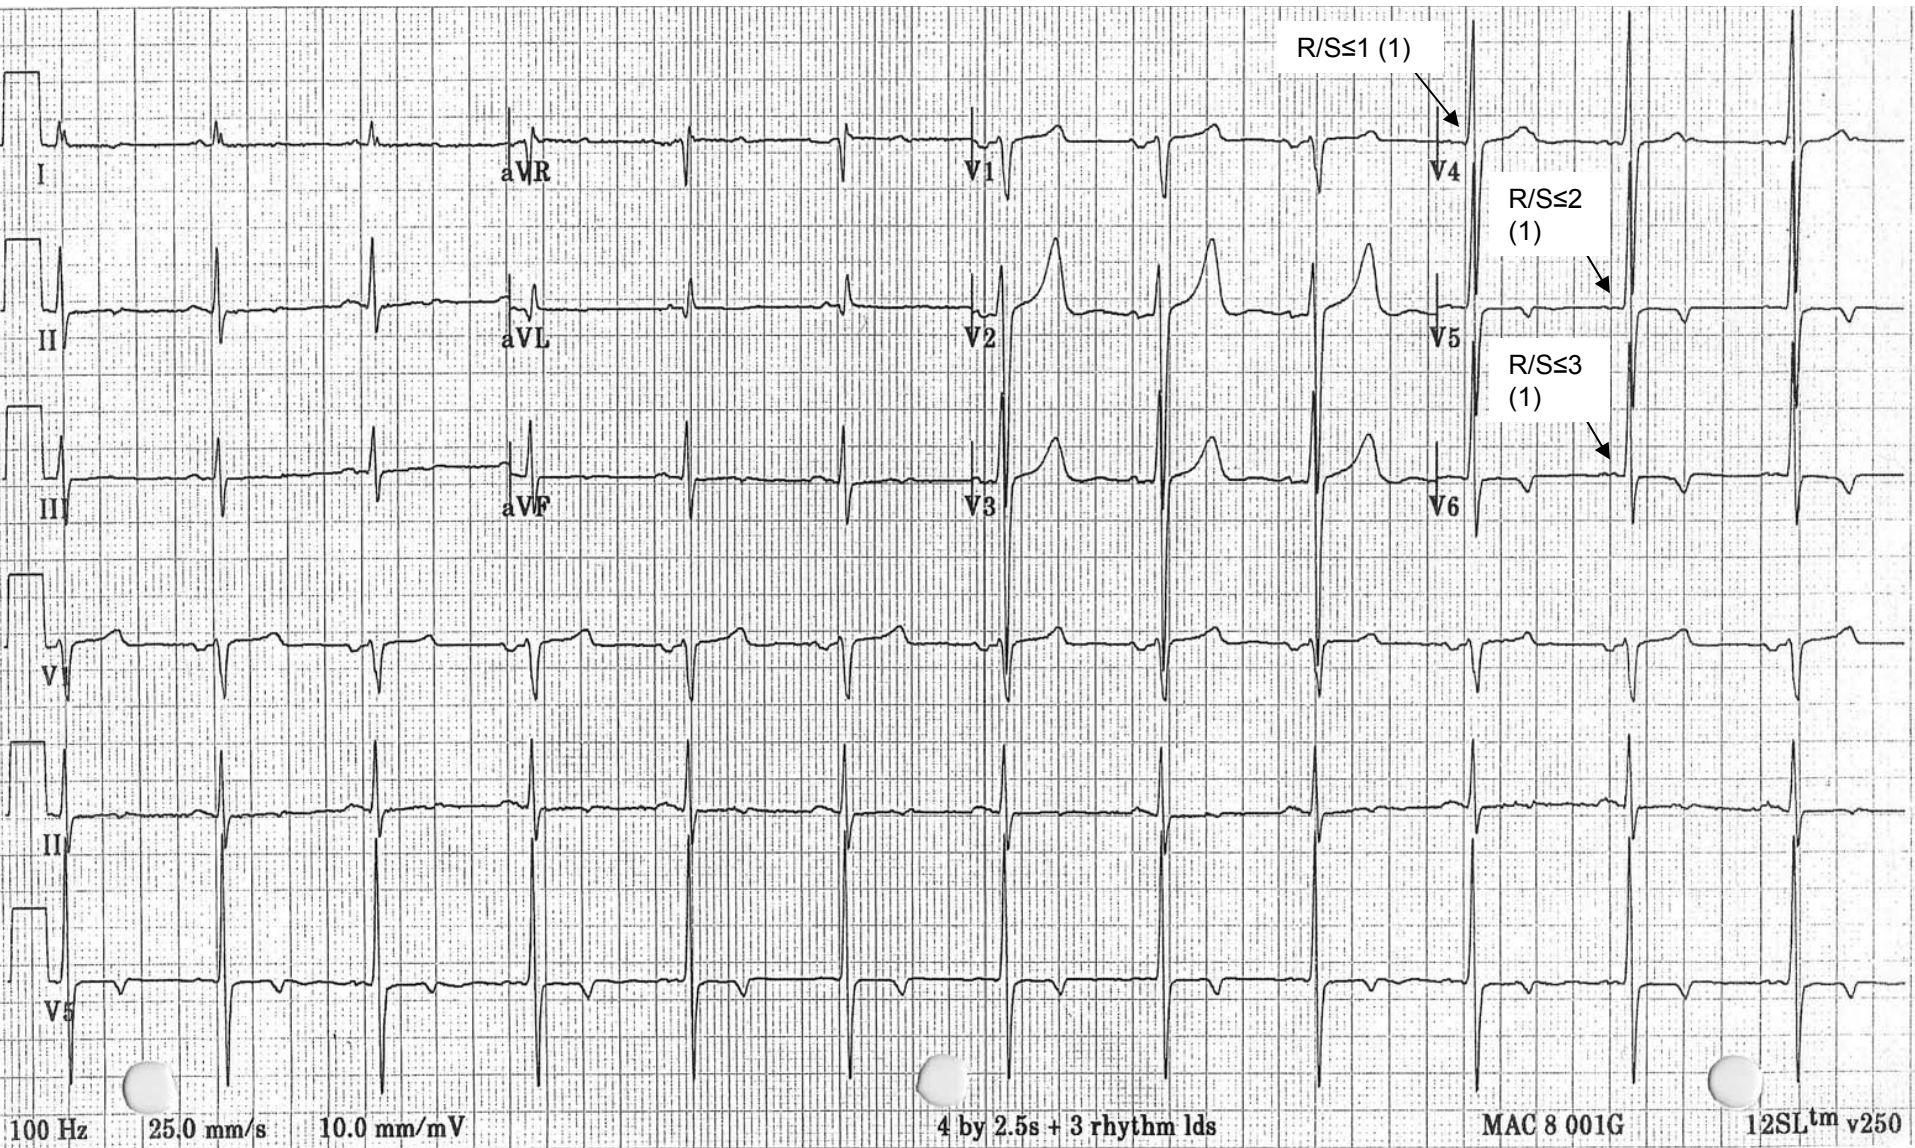

QRS Scoring

Patient ID 10 QRS duration 92ms Amplitude adjust +4%  
 (↑1%/yr age 20-54; ↓1%/yr >55 yrs; ↓ 10% for females)

Age & gender 51 Male QRS axis +33° Duration adjust 0% RAO(\*\*, \*\*\*)Yes (No)  
 (↓ 10% for females)

|            | RBBB            |     | LAFB          |     | LAFB + RBBB     |     | LVH             |     | No Confounders |     |
|------------|-----------------|-----|---------------|-----|-----------------|-----|-----------------|-----|----------------|-----|
| Lead       | Criteria        | Pts | Criteria      | Pts | Criteria        | Pts | Criteria        | Pts | Criteria       | Pts |
| I          | Q ≥ 30 ms       | 1   | Q ≥ 30 ms     | 1   | Q ≥ 30 ms       | 1   | Q ≥ 30 ms       | 1   | Q ≥ 30 ms      | 1   |
|            | R/Q ≤ 1         | 1   | R/Q ≤ 1       | 1   | R/Q ≤ 1         | 1   | R/Q ≤ 1         | 1   | R/Q ≤ 1        | 1   |
|            | R ≤ 0.2 mV      |     | R ≤ 0.2 mV    |     | R ≤ 0.2 mV      |     | R ≤ 0.2 mV      |     | R ≤ 0.2 mV     |     |
| II         | Q ≥ 40 ms       | 2   | Q ≥ 40 ms     | 2   | Q ≥ 40 ms       | 2   | Q ≥ 40 ms       | 2   | Q ≥ 40 ms      | 2   |
|            | Q ≥ 30 ms       | 1   | Q ≥ 30 ms     | 1   | Q ≥ 30 ms       | 1   | Q ≥ 30 ms       | 1   | Q ≥ 30 ms      | 1   |
|            | R/Q ≤ 1         | 1   | R/Q ≤ 1       | 1   | R/Q ≤ 1         | 1   | R/Q ≤ 1         | 1   | R/Q ≤ 1        | 1   |
| aVL        | Q ≥ 30 ms       | 1   | Q ≥ 40 ms     | 1   | Q ≥ 40 ms       | 1   | Q ≥ 40 ms       | 1   | Q ≥ 30 ms      | 1   |
|            | R/Q ≤ 1         | 1   | R/Q ≤ 1       | 1   | R/Q ≤ 1         | 1   | R/Q ≤ 1         | 1   | R/Q ≤ 1        | 1   |
|            | R/S ≤ 1         |     | R/S ≤ 1       |     | R/S ≤ 1         |     | R/S ≤ 1         |     | R/S ≤ 1        |     |
| aVF        | Q ≥ 50 ms       | 3   | Q ≥ 50 ms     | 3   | Q ≥ 50 ms       | 3   | Q ≥ 60 ms       | 3   | Q ≥ 50 ms      | 3   |
|            | Q ≥ 40 ms       | 2   | Q ≥ 40 ms     | 2   | Q ≥ 40 ms       | 2   | Q ≥ 50 ms       | 2   | Q ≥ 40 ms      | 2   |
|            | Q ≥ 30 ms       | 1   | Q ≥ 30 ms     | 1   | Q ≥ 30 ms       | 1   | Q ≥ 40 ms       | 1   | Q ≥ 30 ms      | 1   |
| V1         | R/Q ≤ 1         | 2   | R/Q ≤ 1       | 2   | R/Q ≤ 1         | 2   | R/Q ≤ 1         | 2   | R/Q ≤ 1        | 2   |
|            | R/Q ≤ 2         | 1   | R/Q ≤ 2       | 1   | R/Q ≤ 2         | 1   | R/Q ≤ 2         | 1   | R/Q ≤ 2        | 1   |
|            | Q ≥ 50 ms       | 2   | Q ≥ 50 ms     | 2   | Q ≥ 50 ms       | 2   | any QR          | 2   | any QR         | 2   |
| Ant.       | any Q           | 1   | any QR        | 1   | any Q           | 1   | (or any Q if *) | 1   | any Q          | 1   |
|            | Init R ≤ 2.0 mV |     |               |     |                 |     | NtchInit40      |     |                |     |
|            | R/S ≥ 1         | 1   | R/S ≥ 1       | 1   | R/S ≥ 1         | 1   | R/S ≥ 1         | 1   | R/S ≥ 1        | 1   |
| V1 Post.** | Init R ≥ 60 ms  | 2   | R ≥ 50 ms     | 2   | Init R ≥ 60 ms  | 2   | R ≥ 50 ms       | 2   | R ≥ 50 ms      | 2   |
|            | Init R ≥ 15 mV  |     | R ≥ 1mV       |     | Init R ≥ 15 mV  |     | R ≥ 1mV         |     | R ≥ 1mV        |     |
|            | Init R ≥ 50 ms  | 1   | R ≥ 40 ms     | 1   | Init R ≥ 50 ms  | 1   | R ≥ 40 ms       | 1   | R ≥ 40 ms      | 1   |
| V2         | Init R ≥ 10 mV  |     | R ≥ 0.7 mV    |     | Init R ≥ 10 mV  |     | R ≥ 0.7 mV      |     | R ≥ 0.7 mV     |     |
|            | Q ≥ 50 ms       | 2   | Qs0.2&Ss0.2mV | 1   | Q ≥ 50 ms       | 2   | Qs0.2&Ss0.2 mV  | 1   | Qs0.2&Ss0.2mV  | 1   |
|            | any Q           | 1   | any QR        | 1   | any Q           | 1   | any QR          | 1   | any Q          | 1   |
| V2 Ant.    | R ≤ 10 ms       |     | R ≤ 0.1mV     |     | R ≤ 10 ms       |     | R ≤ 0.1mV       |     | R ≤ 10 ms      |     |
|            | R ≤ 0.1mV       |     |               |     | R ≤ 0.1mV       |     |                 |     | R ≤ 0.1mV      |     |
|            | R/S ≥ 15        | 1   | R/S ≥ 15      | 1   | R/S ≥ 15        | 1   | R/S ≥ 15        | 1   | R/S ≥ 15       | 1   |
| V2 Post.** | Init R ≥ 70 ms  | 2   | R ≥ 60 ms     | 2   | Init R ≥ 70 ms  | 2   | R ≥ 60 ms       | 2   | R ≥ 60 ms      | 2   |
|            | Init R ≥ 2.5 mV |     | R ≥ 2 mV      |     | Init R ≥ 2.5 mV |     | R ≥ 2 mV        |     | R ≥ 2 mV       |     |
|            | Init R ≥ 50 ms  | 1   | R ≥ 50 ms     | 1   | Init R ≥ 50 ms  | 1   | R ≥ 50 ms       | 1   | R ≥ 50 ms      | 1   |
| V3         | Init R ≥ 2.0 mV |     | R ≥ 15 mV     |     | Init R ≥ 2.0 mV |     | R ≥ 15 mV       |     | R ≥ 15 mV      |     |
|            | Q ≥ 30 ms       | 2   | Q ≥ 30 ms     | 2   | Q ≥ 30 ms       | 2   | QR&(Q ≥ 30 ms)  | 2   | Q ≥ 30 ms      | 2   |
|            | R ≤ 10 ms       |     | R ≤ 10 ms     |     | R ≤ 10 ms       |     | NtchInit40      |     | R ≤ 10 ms      |     |
| V4         | Q ≥ 20 ms       | 1   | Q ≥ 20 ms     | 1   | Q ≥ 20 ms       | 1   | Q ≥ 20 ms       | 1   | Q ≥ 20 ms      | 1   |
|            | R/Q ≤ 0.5       | 2   | R/Q ≤ 0.5     | 2   | R/Q ≤ 0.5       | 2   | R/Q ≤ 0.5       | 2   | R/Q ≤ 0.5      | 2   |
|            | R/S ≤ 0.5       |     | R/S ≤ 0.5     |     | R/S ≤ 0.5       |     | R/S ≤ 0.5       |     | R/S ≤ 0.5      |     |
| V5         | R/Q ≤ 1         | 1   | R/Q ≤ 1       | 1   | R/Q ≤ 1         | 1   | R/Q ≤ 1         | 1   | R/Q ≤ 1        | 1   |
|            | R/S ≤ 1         |     | R/S ≤ 1       |     | R/S ≤ 1         |     | R/S ≤ 1         |     | R/S ≤ 1        |     |
|            | R ≤ 0.5 mV      |     | R ≤ 0.5 mV    |     | R ≤ 0.5 mV      |     | R ≤ 0.5 mV      |     | R ≤ 0.5 mV     |     |
| V6         | NtchInit40      |     | NtchInit40    |     | NtchInit40      |     | NtchInit40      |     | NtchInit40     |     |
|            | Q ≥ 30 ms       | 1   | Q ≥ 30 ms     | 1   | Q ≥ 30 ms       | 1   | Q ≥ 30 ms       | 1   | Q ≥ 30 ms      | 1   |
|            | R/Q ≤ 1         | 2   | R/Q ≤ 1       | 2   | R/Q ≤ 1         | 2   | R/Q ≤ 1         | 2   | R/Q ≤ 1        | 2   |
| Total      | R/S ≤ 1         |     | R/S ≤ 1       |     | R/S ≤ 1         |     | R/S ≤ 1         |     | R/S ≤ 1        |     |
|            | R/Q ≤ 3         | 1   | R/Q ≤ 3       | 1   | R/Q ≤ 3         | 1   | R/Q ≤ 3         | 1   | R/Q ≤ 3        | 1   |
|            | R/S ≤ 3         |     | R/S ≤ 2       |     | R/S ≤ 2         |     | R/S ≤ 3         |     | R/S ≤ 3        |     |
| Total      | R ≤ 0.6 mV      |     | R ≤ 0.6 mV    |     | R ≤ 0.6 mV      |     | R ≤ 0.6 mV      |     | R ≤ 0.6 mV     |     |
|            | NtchInit40      |     | NtchInit40    |     | NtchInit40      |     | NtchInit40      |     | NtchInit40     |     |
|            | Points          |     | Points        |     | Points          |     | Points          | 3   | Points         |     |

| LBBB       |            |     |
|------------|------------|-----|
| Lead       | Criteria   | Pts |
| I          | any Q      | 1   |
|            | R/Q ≤ 1    | 2   |
|            | R/S ≤ 1    |     |
| II         | R/Q ≤ 15   | 1   |
|            | R/S ≤ 15   |     |
|            | Q ≥ 40 ms  | 2   |
| aVL        | Q ≥ 30 ms  | 1   |
|            | R/Q ≤ 0.5  | 1   |
|            | R/S ≤ 0.5  |     |
| aVF        | Q ≥ 50 ms  | 2   |
|            | Q ≥ 40 ms  | 1   |
|            | R/Q ≤ 0.5  | 1   |
| V1         | R/S ≤ 0.5  | 2   |
|            | R/Q ≤ 0.5  |     |
|            | R/S ≤ 1    | 1   |
| aVF        | R/S ≤ 1    | 1   |
|            | Q ≥ 50 ms  | 2   |
|            | Q ≥ 40 ms  | 1   |
| V1 Ant.*** | R/Q ≤ 0.5  | 1   |
|            | R/S ≤ 0.5  |     |
|            | R/Q ≤ 1    | 1   |
| V1 Post    | R ≥ 0.3 mV | 2   |
|            | R ≥ 30 ms  |     |
|            | R ≥ 0.2 mV | 1   |
| V2         | R ≥ 20 ms  |     |
|            | S/S' ≥ 2.0 | 3   |
|            | S/S' ≥ 15  | 2   |
| V2 Ant.*** | S/S' ≥ 125 | 1   |
|            | NchInit40  |     |
|            | R ≥ 0.4 mV | 2   |
| V2 Post    | R ≥ 30 ms  |     |
|            | R ≥ 0.3 mV | 1   |
|            | R ≥ 20 ms  |     |
| V5         | S/S' ≥ 2.5 | 3   |
|            | S/S' ≥ 2.0 | 2   |
|            | S/S' ≥ 15  | 1   |
| V6         | any Q      | 1   |
|            | R/R' ≥ 2   | 2   |
|            | R/R' ≥ 1   | 1   |
| Total      | R/S ≤ 2    |     |
|            | R ≤ 0.5 mV | 1   |
|            | Points     |     |

%LV infarct       
 (3 \*#pts)

%LV infarct      %LV infarct      %LV infarct      %LV infarct 9 %LV infarct       
 (3 x#pts) (3 x#pts) (3 x#pts) (3 x#pts) (3 x#pts)

\* (for LVH) if ≥4 other points in leads I, aVL, V4, V5 or V6 then count QS in V1+V3  
 \*\* (RAO) if P positive amp in V1≥0.1mV or aVF P ≥0.175 mV, then exclude V1+V2 R-criteria points  
 \*\*\* (RAO) if P positive amp in V1 ≥0.1mV or aVF P ≥0.175 mV, then exclude V1+V2 R-criteria points

|                         |             |                               |       |                              |                 |
|-------------------------|-------------|-------------------------------|-------|------------------------------|-----------------|
| <b>Patient ID:</b>      | 11          | <b>QRS Duration:</b>          | 169ms | <b>Amplitude Adjustment:</b> | -6%             |
| <b>Age &amp; Sex:</b>   | 61 Male     | <b>QRS Axis:</b>              | +245° | <b>Duration Adjustment:</b>  | 0%              |
| <b>Conduction Type:</b> | LAFB + RBBB | <b>Right Atrial Overload:</b> | No    | <b>Total Points</b>          | 17 points (51%) |

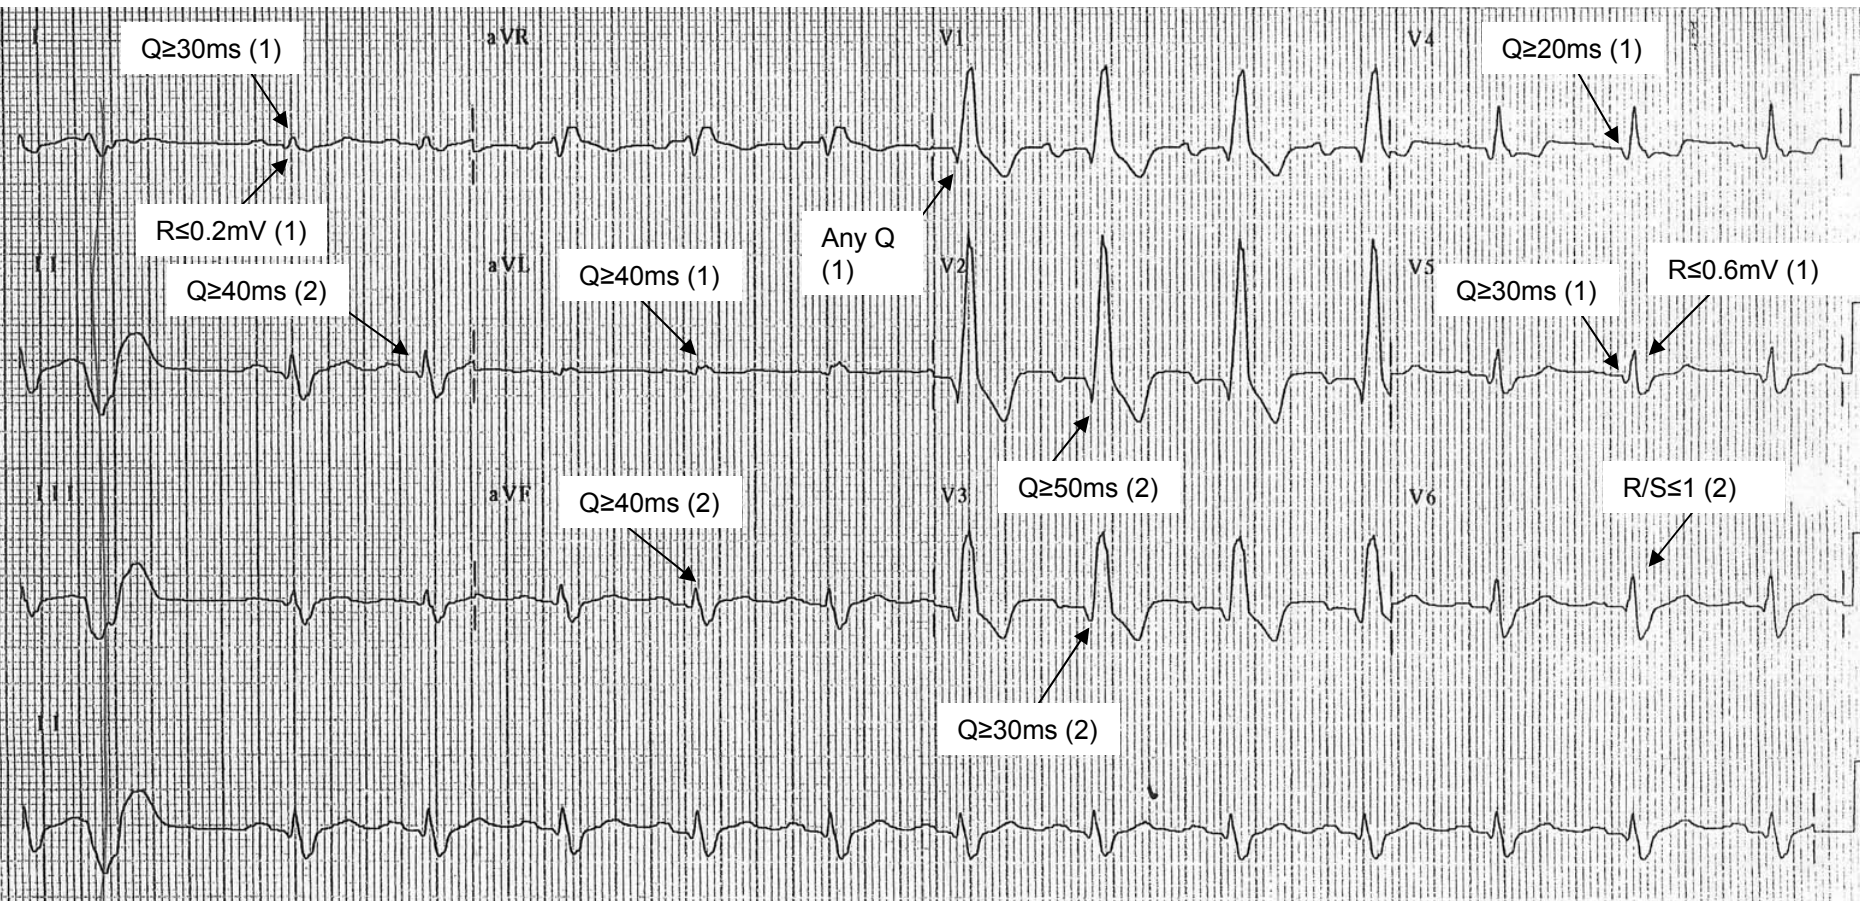



|                         |                |                               |       |                              |                |
|-------------------------|----------------|-------------------------------|-------|------------------------------|----------------|
| <b>Patient ID:</b>      | 12             | <b>QRS Duration:</b>          | 104ms | <b>Amplitude Adjustment:</b> | -26%           |
| <b>Age &amp; Sex:</b>   | 81 Male        | <b>QRS Axis:</b>              | -36°  | <b>Duration Adjustment:</b>  | 0%             |
| <b>Conduction Type:</b> | No Confounders | <b>Right Atrial Overload:</b> | No    | <b>Total Points</b>          | 6 points (18%) |

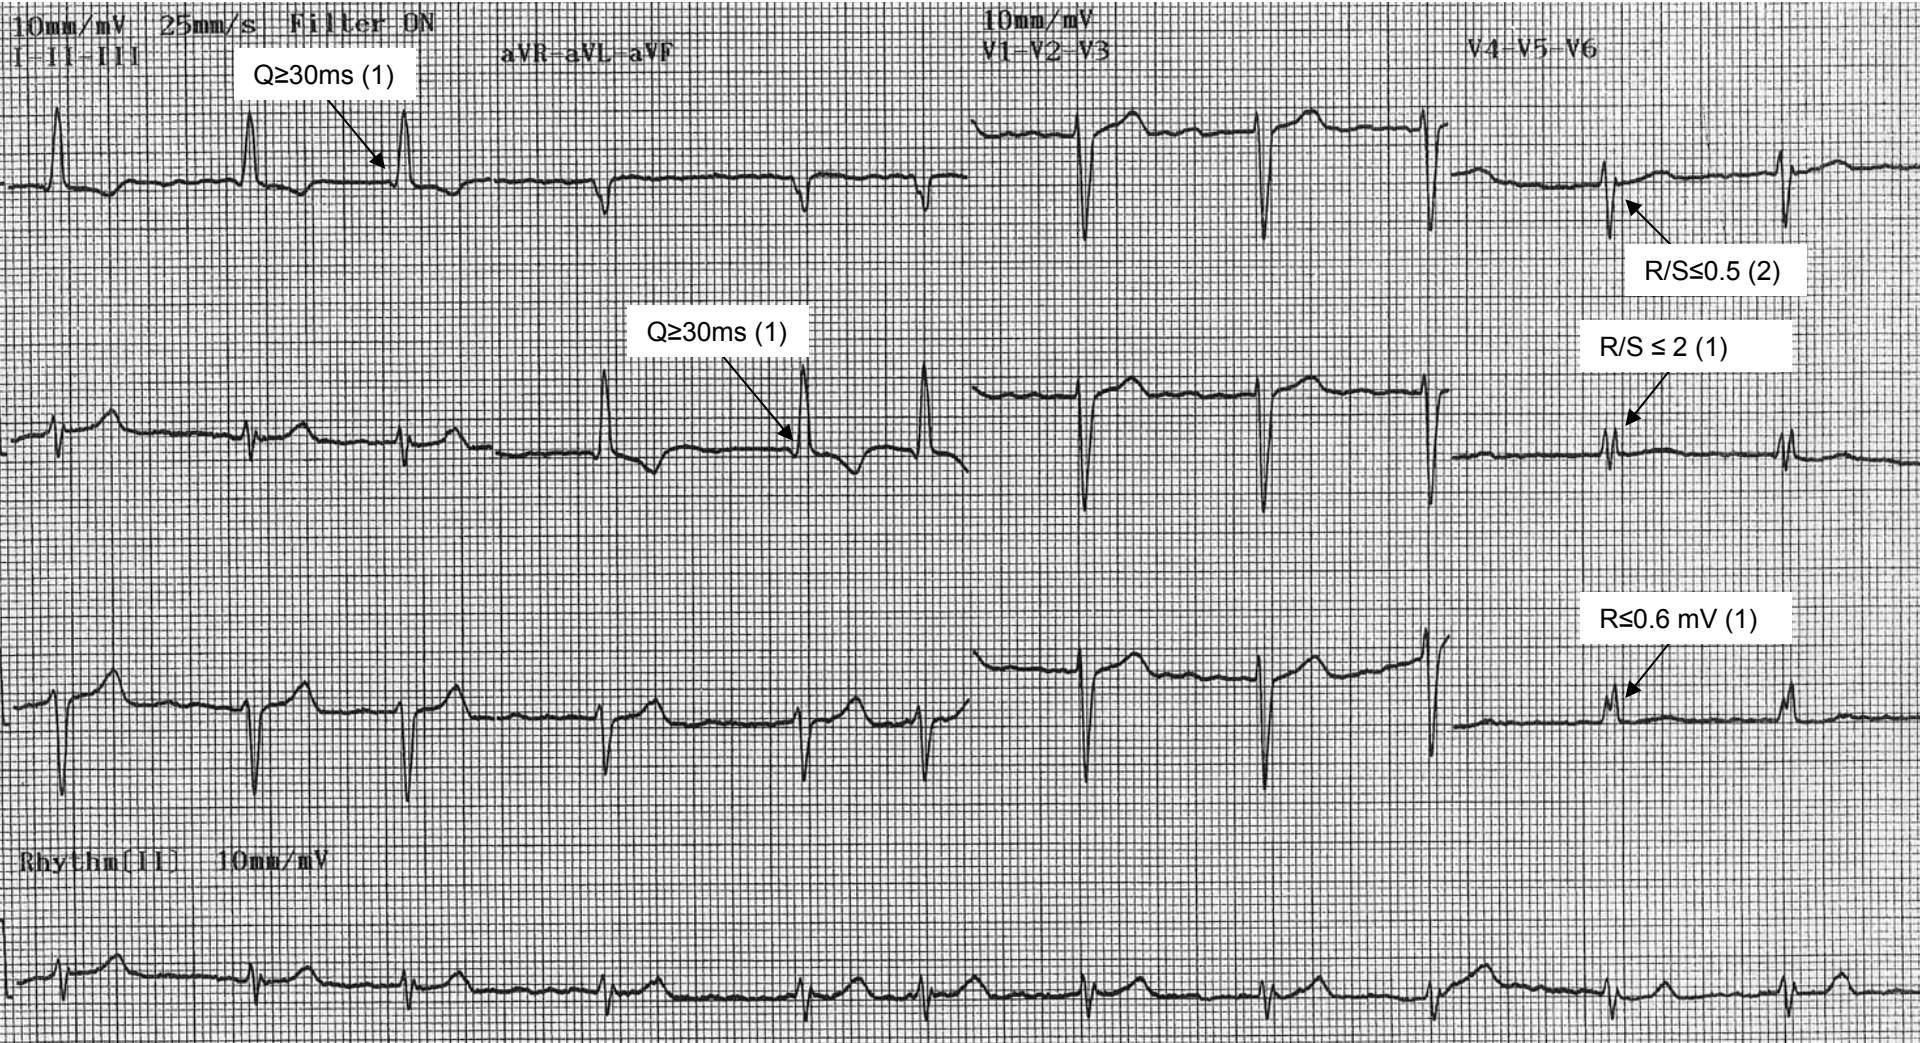

QRS Scoring

Patient ID 12 QRS duration 104ms Amplitude adjust -26%  
 (↑1%/yr age 20-54; ↓1%/yr >55 yrs; ↓ 10% for females)

Age & gender 81 Male QRS axis -36° Duration adjust 0% RAO(\*\*, \*\*\*)Yes(No)  
 (↓ 10% for females)

| Lead       | RBBB            |           | LAFB          |           | LAFB + RBBB     |                | LVH                    |           | No Confounders |            | LBBB    |            |            |   |
|------------|-----------------|-----------|---------------|-----------|-----------------|----------------|------------------------|-----------|----------------|------------|---------|------------|------------|---|
|            | Criteria        | Pts       | Criteria      | Pts       | Criteria        | Pts            | Criteria               | Pts       | Criteria       | Pts        | Lead    | Criteria   | Pts        |   |
| I          | Q ≥ 30 ms       | 1         | Q ≥ 30 ms     | 1         | Q ≥ 30 ms       | 1              | Q ≥ 30 ms              | 1         | Q ≥ 30 ms      | 1          | I       | any Q      | 1          |   |
|            | R/Q ≤ 1         | 1         | R/Q ≤ 1       | 1         | R/Q ≤ 1         | 1              | R/Q ≤ 1                | 1         | R/Q ≤ 1        | 1          |         | R/Q ≤ 1    | 2          |   |
|            | R ≤ 0.2 mV      |           | R ≤ 0.2 mV    |           | R ≤ 0.2 mV      |                | R ≤ 0.2 mV             |           | R ≤ 0.2 mV     |            |         | R/S ≤ 1    |            |   |
| II         | Q ≥ 40 ms       | 2         | Q ≥ 40 ms     | 2         | Q ≥ 40 ms       | 2              | Q ≥ 40 ms              | 2         | Q ≥ 40 ms      | 2          | II      | Q ≥ 40 ms  | 2          |   |
|            | Q ≥ 30 ms       | 1         | Q ≥ 30 ms     | 1         | Q ≥ 30 ms       | 1              | Q ≥ 30 ms              | 1         | Q ≥ 30 ms      | 1          |         | R/Q ≤ 15   | 1          |   |
|            | R/Q ≤ 1         | 1         | R/Q ≤ 1       | 1         | R/Q ≤ 1         | 1              | R/Q ≤ 1                | 1         | R/Q ≤ 1        | 1          |         | R/S ≤ 15   |            |   |
| aVL        | Q ≥ 30 ms       | 1         | Q ≥ 40 ms     | 1         | Q ≥ 40 ms       | 1              | Q ≥ 40 ms              | 1         | Q ≥ 40 ms      | 1          | aVL     | Q ≥ 50 ms  | 2          |   |
|            | R/Q ≤ 1         | 1         | R/Q ≤ 1       | 1         | R/Q ≤ 1         | 1              | R/Q ≤ 1                | 1         | R/Q ≤ 1        | 1          |         | Q ≥ 40 ms  | 1          |   |
|            | R/S ≤ 0.5       |           | R/S ≤ 0.5     |           | R/S ≤ 0.5       |                | R/S ≤ 0.5              |           | R/S ≤ 0.5      |            |         | R/S ≤ 0.5  | 2          |   |
| aVF        | Q ≥ 50 ms       | 3         | Q ≥ 50 ms     | 3         | Q ≥ 50 ms       | 3              | Q ≥ 60 ms              | 3         | Q ≥ 50 ms      | 3          | aVF     | Q ≥ 50 ms  | 2          |   |
|            | Q ≥ 40 ms       | 2         | Q ≥ 40 ms     | 2         | Q ≥ 40 ms       | 2              | Q ≥ 50 ms              | 2         | Q ≥ 40 ms      | 2          |         | Q ≥ 40 ms  | 1          |   |
|            | Q ≥ 30 ms       | 1         | Q ≥ 30 ms     | 1         | Q ≥ 30 ms       | 1              | Q ≥ 40 ms              | 1         | Q ≥ 30 ms      | 1          |         | R/Q ≤ 0.5  | 1          |   |
| V1         | R/Q ≤ 1         | 2         | R/Q ≤ 1       | 2         | R/Q ≤ 1         | 2              | R/Q ≤ 1                | 2         | R/Q ≤ 1        | 2          | V1      | Q ≥ 50 ms  | 2          |   |
|            | R/Q ≤ 2         | 1         | R/Q ≤ 2       | 1         | R/Q ≤ 2         | 1              | R/Q ≤ 2                | 1         | R/Q ≤ 2        | 1          |         | Q ≥ 40 ms  | 1          |   |
|            | R/S ≤ 0.5       |           | R/S ≤ 0.5     |           | R/S ≤ 0.5       |                | R/S ≤ 0.5              |           | R/S ≤ 0.5      |            |         | R/S ≤ 0.5  | 2          |   |
| Ant.       | any Q           | 1         | any QR        | 1         | any Q           | 1              | any QR (or any Q if *) | 1         | any Q          | 1          | Ant.*** | R/S ≤ 1    | 1          |   |
|            | Init R ≤ 20 ms  |           |               |           |                 |                | NtchInit40             |           |                |            |         | R/Q ≤ 1    |            |   |
|            | R/S ≥ 1         | 1         | R/S ≥ 1       | 1         | R/S ≥ 1         | 1              | R/S ≥ 1                | 1         | R/S ≥ 1        | 1          |         | Q ≥ 50 ms  | 2          |   |
| V1 Post.** | Init R ≥ 60 ms  | 2         | R ≥ 50 ms     | 2         | Init R ≥ 60 ms  | 2              | R ≥ 50 ms              | 2         | R ≥ 50 ms      | 2          | V1 Post | Q ≥ 40 ms  | 1          |   |
|            | Init R ≥ 15 mV  |           | R ≥ 1mV       |           | Init R ≥ 15 mV  |                | R ≥ 1mV                |           | R ≥ 1mV        |            |         | R/Q ≤ 0.5  | 1          |   |
|            | Init R ≥ 50 ms  | 1         | R ≥ 40 ms     | 1         | Init R ≥ 50 ms  | 1              | R ≥ 40 ms              | 1         | R ≥ 40 ms      | 1          |         | R/S ≤ 0.5  |            |   |
| V2         | Init R ≥ 10 mV  |           | R ≥ 0.7 mV    |           | Init R ≥ 10 mV  |                | R ≥ 0.7 mV             |           |                |            | V2      | NchInit40  | 1          |   |
|            | Q ≥ 50 ms       | 2         | Qs0.2&Ss0.2mV | 1         | Q ≥ 50 ms       | 2              | Qs0.2&Ss0.2 mV         | 1         | Qs0.2&Ss0.2mV  | 1          |         | Ant.***    | R ≥ 0.3 mV | 2 |
|            | any Q           | 1         | any QR        | 1         | any Q           | 1              | any QR (or any Q if *) | 1         | any Q          | 1          |         |            | R ≥ 30 ms  |   |
| R ≤ 10 ms  |                 | R ≤ 0.1mV |               | R ≤ 10 ms |                 | R ≤ 0.1mV      |                        | R ≤ 10 ms |                | R ≥ 0.2 mV | 1       |            |            |   |
| V2 Post.** | R ≤ 0.1mV       |           | R/S ≥ 15      | 1         | R ≤ 0.1mV       |                | R/S ≥ 15               | 1         | R/S ≥ 15       | 1          | V2 Post | R ≥ 20 ms  |            |   |
|            | Init R ≥ 70 ms  | 2         | R ≥ 60 ms     | 2         | Init R ≥ 70 ms  | 2              | R ≥ 60 ms              | 2         | R ≥ 60 ms      | 2          |         | V1         | S/S' ≥ 2.0 | 3 |
|            | Init R ≥ 2.5 mV |           | R ≥ 2 mV      |           | Init R ≥ 2.5 mV |                | R ≥ 2 mV               |           | R ≥ 2 mV       |            |         | S/S' ≥ 1.5 | 2          |   |
| V3         | Init R ≥ 50 ms  | 1         | R ≥ 50 ms     | 1         | Init R ≥ 50 ms  | 1              | R ≥ 50 ms              | 1         | R ≥ 50 ms      | 1          | V3      | S/S' ≥ 125 | 1          |   |
|            | Init R ≥ 2.0 mV |           | R ≥ 15 mV     |           | Init R ≥ 2.0 mV |                | R ≥ 15 mV              |           | R ≥ 15 mV      |            |         | Ant.***    | NchInit40  | 1 |
|            | Qs0.3&Ss0.3mV   | 1         | Qs0.3&Ss0.3mV | 1         | Qs0.3&Ss0.3mV   | 1              | Qs0.3&Ss0.3mV          | 1         | Qs0.3&Ss0.3mV  | 1          |         |            | R ≥ 0.4 mV | 2 |
| Q ≥ 30 ms  | 2               | Q ≥ 30 ms | 2             | Q ≥ 30 ms | 2               | QR&(Q ≥ 30 ms) | 2                      | Q ≥ 30 ms | 2              | R ≥ 30 ms  |         |            |            |   |
| V4         | R ≤ 10 ms       |           | R ≤ 10 ms     |           | R ≤ 10 ms       |                | NtchInit40             |           | R ≤ 10 ms      |            | V4      | R ≥ 0.3 mV | 1          |   |
|            | Q ≥ 20 ms       | 1         | Q ≥ 20 ms     | 1         | Q ≥ 20 ms       | 1              | any QR (or any Q if *) | 1         | Q ≥ 20 ms      | 1          |         | R ≥ 20 ms  |            |   |
|            | R ≤ 20 ms       |           | R ≤ 20 ms     |           | R ≤ 20 ms       |                | R ≤ 20 ms              |           | R ≤ 20 ms      |            |         | V2         | S/S' ≥ 2.5 | 3 |
| V5         | Q ≥ 20 ms       | 1         | Q ≥ 20 ms     | 1         | Q ≥ 20 ms       | 1              | Q ≥ 20 ms              | 1         | Q ≥ 20 ms      | 1          | V5      | S/S' ≥ 2.0 | 2          |   |
|            | R/Q ≤ 0.5       | 2         | R/Q ≤ 0.5     | 2         | R/Q ≤ 0.5       | 2              | R/Q ≤ 0.5              | 2         | R/Q ≤ 0.5      | 2          |         | S/S' ≥ 1.5 | 1          |   |
|            | R/S ≤ 0.5       |           | R/S ≤ 0.5     |           | R/S ≤ 0.5       |                | R/S ≤ 0.5              |           | R/S ≤ 0.5      |            |         | any Q      |            |   |
| V6         | R/Q ≤ 1         | 1         | R/Q ≤ 1       | 1         | R/Q ≤ 1         | 1              | R/Q ≤ 1                | 1         | R/Q ≤ 1        | 1          | V6      | R/R' ≥ 2   | 2          |   |
|            | R/S ≤ 1         |           | R/S ≤ 1       |           | R/S ≤ 1         |                | R/S ≤ 1                |           | R/S ≤ 1        |            |         | R/R' ≥ 1   | 1          |   |
|            | R/Q ≤ 3         | 1         | R/Q ≤ 3       | 1         | R/Q ≤ 3         | 1              | R/Q ≤ 3                | 1         | R/Q ≤ 3        | 1          |         | R/S ≤ 2    |            |   |
| Total      | R ≤ 0.5 mV      |           | R ≤ 0.5 mV    |           | R ≤ 0.5 mV      |                | R ≤ 0.5 mV             |           | R ≤ 0.5 mV     |            | Total   | R ≤ 0.5 mV | 1          |   |
|            | NtchInit40      |           | NtchInit40    |           | NtchInit40      |                | NtchInit40             |           | NtchInit40     |            |         | R/S ≤ 2    |            |   |
|            | Q ≥ 30 ms       | 1         | Q ≥ 30 ms     | 1         | Q ≥ 30 ms       | 1              | Q ≥ 30 ms              | 1         | Q ≥ 30 ms      | 1          |         | Q ≥ 20 ms  | 1          |   |
| Total      | R/Q ≤ 1         | 2         | R/Q ≤ 1       | 2         | R/Q ≤ 1         | 2              | R/Q ≤ 1                | 2         | R/Q ≤ 1        | 2          | Total   | R/R' ≥ 2   | 2          |   |
|            | R/S ≤ 1         |           | R/S ≤ 1       |           | R/S ≤ 1         |                | R/S ≤ 1                |           | R/S ≤ 1        |            |         | R/R' ≥ 1   | 1          |   |
|            | R/Q ≤ 3         | 1         | R/Q ≤ 3       | 1         | R/Q ≤ 3         | 1              | R/Q ≤ 3                | 1         | R/Q ≤ 3        | 1          |         | R/S ≤ 2    |            |   |
| Total      | R/S ≤ 3         |           | R/S ≤ 2       |           | R/S ≤ 2         |                | R/S ≤ 3                |           | R/S ≤ 3        |            | Total   | R/S ≤ 2    | 1          |   |
|            | R ≤ 0.6 mV      |           | R ≤ 0.6 mV    |           | R ≤ 0.6 mV      |                | R ≤ 0.6 mV             |           | R ≤ 0.6 mV     |            |         | R/S ≤ 2    |            |   |
|            | NtchInit40      |           | NtchInit40    |           | NtchInit40      |                | NtchInit40             |           | NtchInit40     |            |         | R ≤ 0.6 mV | 1          |   |
| Total      | Points          |           | Points        |           | Points          |                | Points                 |           | Points         |            | Total   | Points     |            |   |
|            | Points          |           | Points        |           | Points          |                | Points                 |           | Points         |            |         | Points     |            |   |
|            | Points          |           | Points        |           | Points          |                | Points                 |           | Points         |            |         | Points     |            |   |

%LV infarct (3 x #pts) \_\_\_\_\_ %LV infarct (3 x #pts) 18

\* (for LVH) if ≥4 other points in leads I, aVL, V4, V5 or V6 then count QS in V1+V3  
 \*\* (RAO) if P positive amp in V1≥0.1mV or aVF P ≥0.175 mV, then exclude V1-V2 Post criteria  
 \*\*\* (RAO) if P positive amp in V1 ≥0.1mV or aVF P ≥0.175 mV, then exclude V1-V2 R-criteria points



|                         |                |                               |       |                              |                 |
|-------------------------|----------------|-------------------------------|-------|------------------------------|-----------------|
| <b>Patient ID:</b>      | 13             | <b>QRS Duration:</b>          | 104ms | <b>Amplitude Adjustment:</b> | +4%             |
| <b>Age &amp; Sex:</b>   | 51 Male        | <b>QRS Axis:</b>              | +91°  | <b>Duration Adjustment:</b>  | 0%              |
| <b>Conduction Type:</b> | No Confounders | <b>Right Atrial Overload:</b> | No    | <b>Total Points</b>          | 14 points (42%) |

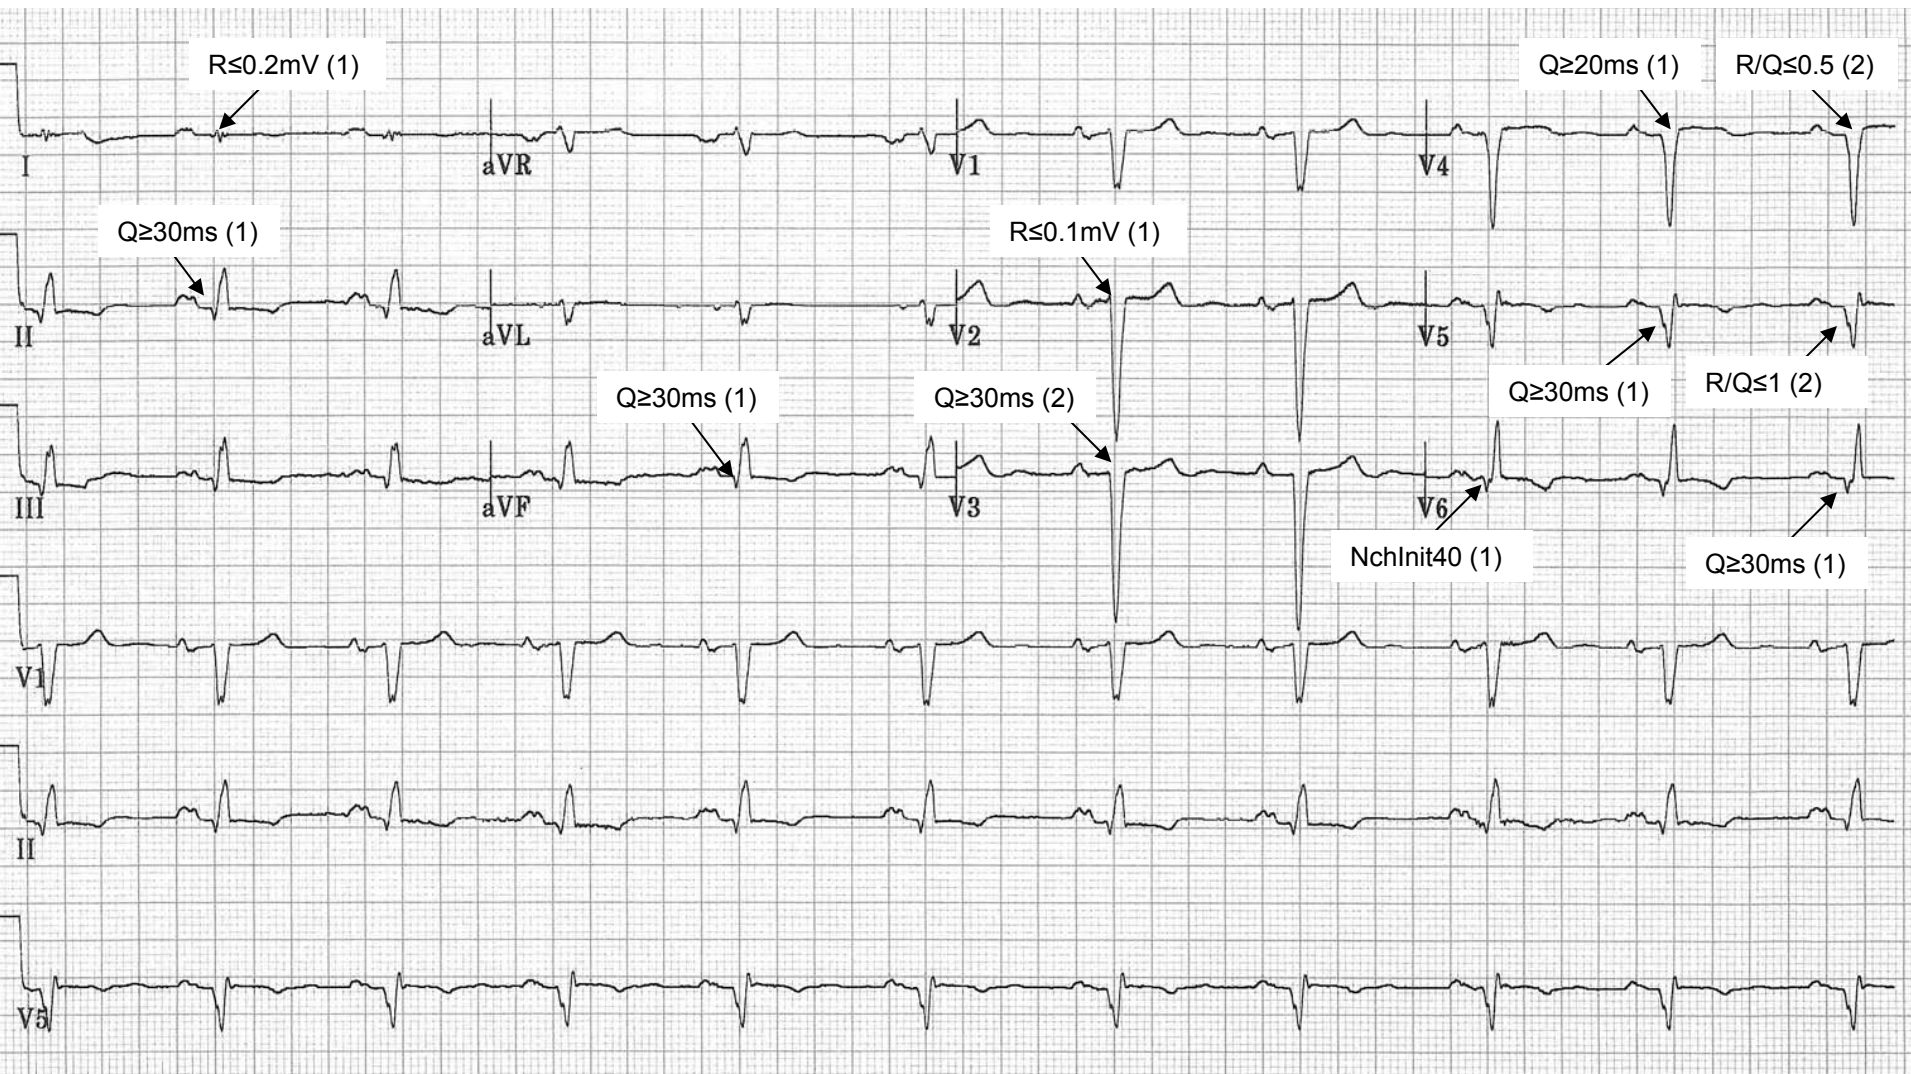

Patient ID 13

QRS duration 104ms

Amplitude adjust +4%  
(↑1%/yr age 20-54; ↓1%/yr >55 yrs; ↓ 10% for females)

Age & gender 51 Male

QRS axis +91°

Duration adjust 0% RAO(\*\*, \*\*\*)Yes(No)  
(↓ 10% for females)

|           | RBBB            |     | LAFB          |     | LAFB + RBBB     |     | LVH             |     | No Confounders |     | LBBB      |            |            |   |
|-----------|-----------------|-----|---------------|-----|-----------------|-----|-----------------|-----|----------------|-----|-----------|------------|------------|---|
| Lead      | Criteria        | Pts | Criteria      | Pts | Criteria        | Pts | Criteria        | Pts | Criteria       | Pts | Lead      | Criteria   | Pts        |   |
| I         | Q ≥ 30 ms       | 1   | Q ≥ 30 ms     | 1   | Q ≥ 30 ms       | 1   | Q ≥ 30 ms       | 1   | Q ≥ 30 ms      | 1   | I         | any Q      | 1          |   |
|           | R/Q ≤ 1         | 1   | R/Q ≤ 1       | 1   | R/Q ≤ 1         | 1   | R/Q ≤ 1         | 1   | R/Q ≤ 1        | 1   |           | R/Q ≤ 1    | 2          |   |
|           | R ≤ 0.2 mV      |     | R ≤ 0.2 mV    |     | R ≤ 0.2 mV      |     | R ≤ 0.2 mV      |     | R ≤ 0.2 mV     |     |           | R/S ≤ 1    | 1          |   |
| II        | Q ≥ 40 ms       | 2   | Q ≥ 40 ms     | 2   | Q ≥ 40 ms       | 2   | Q ≥ 40 ms       | 2   | Q ≥ 40 ms      | 2   | II        | Q ≥ 40 ms  | 2          |   |
|           | Q ≥ 30 ms       | 1   | Q ≥ 30 ms     | 1   | Q ≥ 30 ms       | 1   | Q ≥ 30 ms       | 1   | Q ≥ 30 ms      | 1   |           | R/Q ≤ 15   | 1          |   |
| aVL       | Q ≥ 30 ms       | 1   | Q ≥ 40 ms     | 1   | Q ≥ 40 ms       | 1   | Q ≥ 40 ms       | 1   | Q ≥ 30 ms      | 1   | aVL       | Q ≥ 40 ms  | 2          |   |
|           | R/Q ≤ 1         | 1   | R/Q ≤ 1       | 1   | R/Q ≤ 1         | 1   | R/Q ≤ 1         | 1   | R/Q ≤ 1        | 1   |           | Q ≥ 30 ms  | 1          |   |
| aVF       | Q ≥ 50 ms       | 3   | Q ≥ 50 ms     | 3   | Q ≥ 50 ms       | 3   | Q ≥ 60 ms       | 3   | Q ≥ 50 ms      | 3   | aVF       | R/Q ≤ 0.5  | 1          |   |
|           | Q ≥ 40 ms       | 2   | Q ≥ 40 ms     | 2   | Q ≥ 40 ms       | 2   | Q ≥ 50 ms       | 2   | Q ≥ 40 ms      | 2   |           | R/S ≤ 0.5  | 1          |   |
|           | Q ≥ 30 ms       | 1   | Q ≥ 30 ms     | 1   | Q ≥ 30 ms       | 1   | Q ≥ 40 ms       | 1   | Q ≥ 30 ms      | 1   |           | Q ≥ 50 ms  | 2          |   |
| V1        | R/Q ≤ 1         | 2   | R/Q ≤ 1       | 2   | R/Q ≤ 1         | 2   | R/Q ≤ 1         | 2   | R/Q ≤ 1        | 2   | V1        | Q ≥ 40 ms  | 1          |   |
|           | R/Q ≤ 2         | 1   | R/Q ≤ 2       | 1   | R/Q ≤ 2         | 1   | R/Q ≤ 2         | 1   | R/Q ≤ 2        | 1   |           | R/S ≤ 0.5  | 2          |   |
| Ant.      | Q ≥ 50 ms       | 2   | Q ≥ 50 ms     | 2   | Q ≥ 50 ms       | 2   | any QR          | 1   | any QR         | 1   | Ant.      | R/Q ≤ 0.5  | 1          |   |
|           | any Q           | 1   | any QR        | 1   | any Q           | 1   | (or any Q if *) | 1   | any Q          | 1   |           | R/S ≤ 1    | 1          |   |
| V1 Post.* | Init R ≤ 20 ms  |     |               |     |                 |     | NtchInit40      |     |                |     | V1 Post.* | R/Q ≤ 1    | 1          |   |
|           | Init R ≥ 60 ms  | 2   | R ≥ 50 ms     | 2   | Init R ≥ 60 ms  | 2   | R ≥ 50 ms       | 2   | R ≥ 50 ms      | 2   |           | Q ≥ 50 ms  | 2          |   |
|           | Init R ≥ 15 mV  |     | R ≥ 1mV       |     | Init R ≥ 15 mV  |     | R ≥ 1mV         |     | R ≥ 1mV        |     |           | Q ≥ 40 ms  | 1          |   |
|           | Init R ≥ 50 ms  | 1   | R ≥ 40 ms     | 1   | Init R ≥ 50 ms  | 1   | R ≥ 40 ms       | 1   | R ≥ 40 ms      | 1   |           | R/Q ≤ 0.5  | 1          |   |
|           | Init R ≥ 10 mV  |     | R ≥ 0.7 mV    |     | Init R ≥ 10 mV  |     | R ≥ 0.7 mV      |     | R ≥ 0.7 mV     |     |           | R/S ≤ 0.5  | 2          |   |
| V2        | Qs0.2&Ss0.2mV   | 1   |               |     |                 |     | Qs0.2&Ss0.2mV   | 1   | Qs0.2&Ss0.2mV  | 1   | V2        | NchInit40  | 1          |   |
|           |                 |     |               |     |                 |     |                 |     |                |     |           | Ant.***    | R ≥ 0.3 mV | 2 |
| Ant.      | Q ≥ 50 ms       | 2   | any QR        | 1   | Q ≥ 50 ms       | 2   | any QR          | 1   | any Q          | 1   | Ant.      | R ≥ 30 ms  | 1          |   |
|           | any Q           | 1   | R ≤ 10 ms     | 1   | any Q           | 1   | (or any Q if *) | 1   | R ≤ 10 ms      | 1   |           | R ≥ 0.2 mV | 1          |   |
| V2 Post.* | R ≤ 0.1mV       |     | R ≤ 0.1mV     |     | R ≤ 0.1mV       |     | NtchInit40      |     | R ≤ 0.1mV      |     | V2 Post.* | R ≥ 20 ms  | 1          |   |
|           |                 |     |               |     |                 |     |                 |     |                |     |           | V1         | S/S' ≥ 2.0 | 3 |
| V2        | R/S ≥ 15        | 1   | R/S ≥ 15      | 1   | R/S ≥ 15        | 1   | R/S ≥ 15        | 1   | R/S ≥ 15       | 1   | V2        | S/S' ≥ 1.5 | 2          |   |
|           | Init R ≥ 70 ms  | 2   | R ≥ 60 ms     | 2   | Init R ≥ 70 ms  | 2   | R ≥ 60 ms       | 2   | R ≥ 60 ms      | 2   |           | S/S' ≥ 125 | 1          |   |
| V2 Post.* | Init R ≥ 2.5 mV |     | R ≥ 2 mV      |     | Init R ≥ 2.5 mV |     | R ≥ 2 mV        |     | R ≥ 2 mV       |     | V2 Post.* | NchInit40  | 1          |   |
|           | Init R ≥ 50 ms  | 1   | R ≥ 50 ms     | 1   | Init R ≥ 50 ms  | 1   | R ≥ 50 ms       | 1   | R ≥ 50 ms      | 1   |           | Ant.***    | R ≥ 0.4 mV | 2 |
| V3        | Init R ≥ 2.0 mV |     | R ≥ 15 mV     |     | Init R ≥ 2.0 mV |     | R ≥ 15 mV       |     | R ≥ 15 mV      |     | V3        | R ≥ 30 ms  | 1          |   |
|           |                 |     | Qs0.3&Ss0.3mV | 1   |                 |     | Qs0.3&Ss0.3mV   | 1   | Qs0.3&Ss0.3mV  | 1   |           | R ≥ 0.3 mV | 1          |   |
| V3        | Q ≥ 30 ms       | 2   | Q ≥ 30 ms     | 2   | Q ≥ 30 ms       | 2   | QR&(Q ≥ 30 ms)  | 2   | Q ≥ 30 ms      | 2   | V3        | R ≥ 20 ms  | 1          |   |
|           | R ≤ 10 ms       |     | R ≤ 10 ms     |     | R ≤ 10 ms       |     | NtchInit40      |     | R ≤ 10 ms      |     |           | V2         | S/S' ≥ 2.5 | 3 |
|           | Q ≥ 20 ms       | 1   | Q ≥ 20 ms     | 1   | Q ≥ 20 ms       | 1   | any QR          | 1   | Q ≥ 20 ms      | 1   |           | Post       | S/S' ≥ 2.0 | 2 |
|           | R ≤ 20 ms       |     | R ≤ 20 ms     |     | R ≤ 20 ms       |     | (or any Q if *) |     | R ≤ 20 ms      |     |           | S/S' ≥ 1.5 | 1          |   |
|           |                 |     |               |     |                 |     |                 |     |                |     |           | V5         | any Q      | 1 |
| V4        | Q ≥ 20 ms       | 1   | Q ≥ 20 ms     | 1   | Q ≥ 20 ms       | 1   | Q ≥ 20 ms       | 1   | Q ≥ 20 ms      | 1   | V4        | R/R' ≥ 2   | 2          |   |
|           | R/Q ≤ 0.5       | 2   | R/Q ≤ 0.5     | 2   | R/Q ≤ 0.5       | 2   | R/Q ≤ 0.5       | 2   | R/Q ≤ 0.5      | 2   |           | R/R' ≥ 1   | 1          |   |
|           | R/S ≤ 0.5       |     | R/S ≤ 0.5     |     | R/S ≤ 0.5       |     | R/S ≤ 0.5       |     | R/S ≤ 0.5      |     |           | R/S ≤ 2    | 1          |   |
|           | R/Q ≤ 1         | 1   | R/Q ≤ 1       | 1   | R/Q ≤ 1         | 1   | R/Q ≤ 1         | 1   | R/Q ≤ 1        | 1   |           | R ≤ 0.5 mV | 1          |   |
|           | R/S ≤ 1         |     | R/S ≤ 1       |     | R/S ≤ 1         |     | R/S ≤ 1         |     | R/S ≤ 1        |     |           |            |            |   |
| V5        | R ≤ 0.5 mV      |     | R ≤ 0.5 mV    |     | R ≤ 0.5 mV      |     | R ≤ 0.5 mV      |     | R ≤ 0.5 mV     |     | V5        | R ≤ 0.5 mV | 1          |   |
|           | NtchInit40      |     | NtchInit40    |     | NtchInit40      |     | NtchInit40      |     | NtchInit40     |     |           | Post       | S/S' ≥ 2.0 | 2 |
|           | Q ≥ 30 ms       | 1   | Q ≥ 30 ms     | 1   | Q ≥ 30 ms       | 1   | Q ≥ 30 ms       | 1   | Q ≥ 30 ms      | 1   |           | S/S' ≥ 1.5 | 1          |   |
|           | R/Q ≤ 1         | 2   | R/Q ≤ 1       | 2   | R/Q ≤ 1         | 2   | R/Q ≤ 1         | 2   | R/Q ≤ 1        | 2   |           | V6         | any Q      | 1 |
|           | R/S ≤ 1         |     | R/S ≤ 1       |     | R/S ≤ 1         |     | R/S ≤ 1         |     | R/S ≤ 1        |     |           | Q ≥ 20 ms  | 1          |   |
| V6        | R/Q ≤ 2         | 1   | R/Q ≤ 2       | 1   | R/Q ≤ 2         | 1   | R/Q ≤ 2         | 1   | R/Q ≤ 2        | 1   | V6        | R/R' ≥ 2   | 2          |   |
|           | R/S ≤ 2         |     | R/S ≤ 15      |     | R/S ≤ 15        |     | R/S ≤ 2         |     | R/S ≤ 2        |     |           | R/R' ≥ 1   | 1          |   |
|           | R ≤ 0.6 mV      |     | R ≤ 0.6 mV    |     | R ≤ 0.6 mV      |     | R ≤ 0.6 mV      |     | R ≤ 0.6 mV     |     |           | R/S ≤ 2    | 1          |   |
|           | NtchInit40      |     | NtchInit40    |     | NtchInit40      |     | NtchInit40      |     | NtchInit40     |     |           |            |            |   |
|           |                 |     |               |     |                 |     |                 |     |                |     |           |            |            |   |
| V6        | Q ≥ 30 ms       | 1   | Q ≥ 30 ms     | 1   | Q ≥ 30 ms       | 1   | Q ≥ 30 ms       | 1   | Q ≥ 30 ms      | 1   | V6        | Q ≥ 20 ms  | 1          |   |
|           | R/Q ≤ 1         | 2   | R/Q ≤ 1       | 2   | R/Q ≤ 1         | 2   | R/Q ≤ 1         | 2   | R/Q ≤ 1        | 2   |           | R/R' ≥ 2   | 2          |   |
|           | R/S ≤ 1         |     | R/S ≤ 1       |     | R/S ≤ 1         |     | R/S ≤ 1         |     | R/S ≤ 1        |     |           | R/R' ≥ 1   | 1          |   |
|           | R/Q ≤ 3         | 1   | R/Q ≤ 3       | 1   | R/Q ≤ 3         | 1   | R/Q ≤ 3         | 1   | R/Q ≤ 3        | 1   |           | R/S ≤ 2    | 1          |   |
|           | R/S ≤ 3         |     | R/S ≤ 2       |     | R/S ≤ 2         |     | R/S ≤ 3         |     | R/S ≤ 3        |     |           |            |            |   |
| Total     | R ≤ 0.6 mV      |     | R ≤ 0.6 mV    |     | R ≤ 0.6 mV      |     | R ≤ 0.6 mV      |     | R ≤ 0.6 mV     |     | Total     | Points     | 14         |   |
|           | NtchInit40      |     | NtchInit40    |     | NtchInit40      |     | NtchInit40      |     | NtchInit40     |     |           |            |            |   |

%LV infarct (3 x #pts) \_\_\_\_\_ %LV infarct (3 x #pts) **42**

\* (for LVH) if ≥ 4 other points in leads I, aVL, V4, V5 or V6 then count QS in V1+V3

\*\* (RAO) if P positive amp in V1 ≥ 0.1mV or aVF P ≥ 0.175 mV, then exclude V1-V2 R-criteria points

\*\*\* (RAO) if P positive amp in V1 ≥ 0.1mV or aVF P ≥ 0.175 mV, then exclude V1-V2 R-criteria points

|                         |         |                               |       |                              |                |
|-------------------------|---------|-------------------------------|-------|------------------------------|----------------|
| <b>Patient ID:</b>      | 14      | <b>QRS Duration:</b>          | 128ms | <b>Amplitude Adjustment:</b> | -2%            |
| <b>Age &amp; Sex:</b>   | 57 Male | <b>QRS Axis:</b>              | -59°  | <b>Duration Adjustment:</b>  | 0%             |
| <b>Conduction Type:</b> | LAFB    | <b>Right Atrial Overload:</b> | No    | <b>Total Points</b>          | 8 points (24%) |

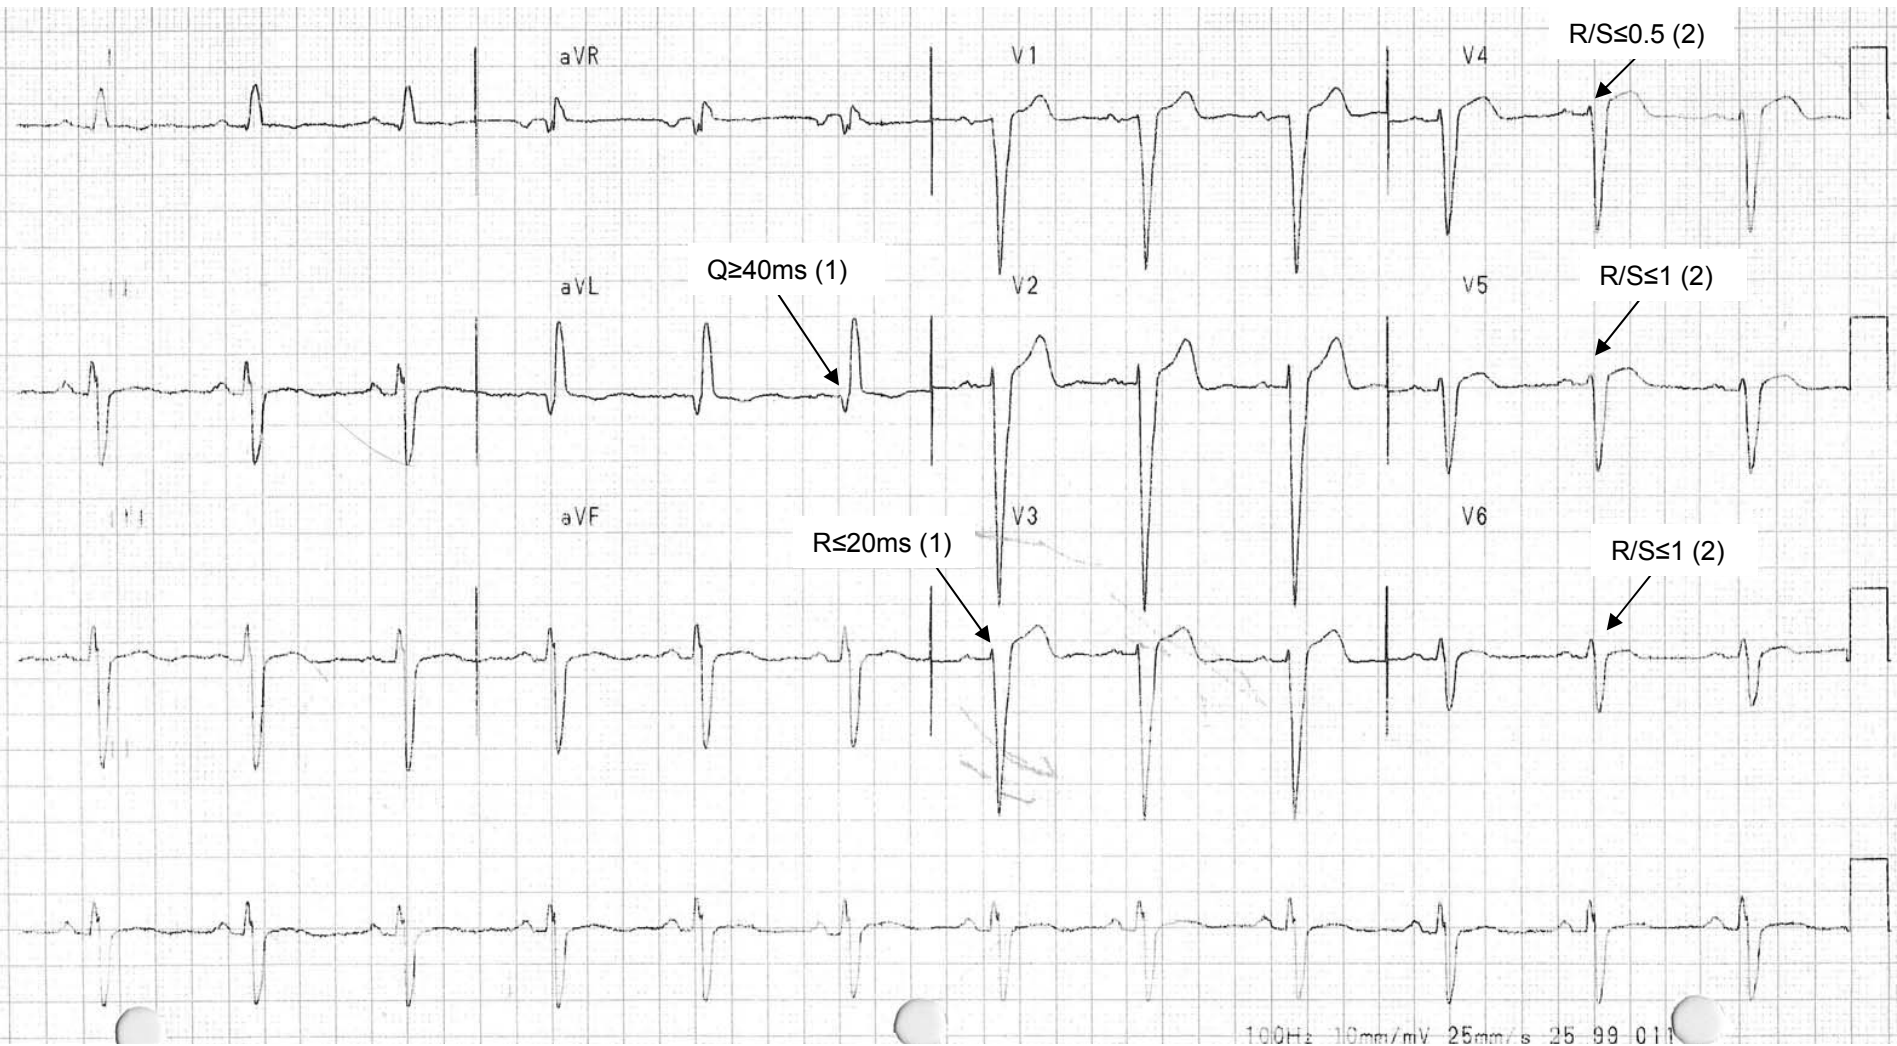

QRS Scoring

Patient ID 14 QRS duration 128ms Amplitude adjust -2%  
 (↑1%/yr age 20-54; ↓1%/yr >55 yrs; ↓ 10% for females)

Age & gender 57 Male QRS axis -59° Duration adjust 0% RAO(\*\*, \*\*\*)Yes (No)  
 (↓ 10% for females)

| Lead         | RBBB            |     | LAFB          |          | LAFB + RBBB     |     | LVH              |     | No Confounders |     |
|--------------|-----------------|-----|---------------|----------|-----------------|-----|------------------|-----|----------------|-----|
|              | Criteria        | Pts | Criteria      | Pts      | Criteria        | Pts | Criteria         | Pts | Criteria       | Pts |
| I            | Q ≥ 30 ms       | 1   | Q ≥ 30 ms     | 1        | Q ≥ 30 ms       | 1   | Q ≥ 30 ms        | 1   | Q ≥ 30 ms      | 1   |
|              | R/Q ≤ 1         | 1   | R/Q ≤ 1       | 1        | R/Q ≤ 1         | 1   | R/Q ≤ 1          | 1   | R/Q ≤ 1        | 1   |
|              | R ≤ 0.2 mV      |     | R ≤ 0.2 mV    |          | R ≤ 0.2 mV      |     | R ≤ 0.2 mV       |     | R ≤ 0.2 mV     |     |
| II           | Q ≥ 40 ms       | 2   | Q ≥ 40 ms     | 2        | Q ≥ 40 ms       | 2   | Q ≥ 40 ms        | 2   | Q ≥ 40 ms      | 2   |
|              | Q ≥ 30 ms       | 1   | Q ≥ 30 ms     | 1        | Q ≥ 30 ms       | 1   | Q ≥ 30 ms        | 1   | Q ≥ 30 ms      | 1   |
|              | R/Q ≤ 1         | 1   | R/Q ≤ 1       | 1        | R/Q ≤ 1         | 1   | R/Q ≤ 1          | 1   | R/Q ≤ 1        | 1   |
| aVL          | Q ≥ 30 ms       | 1   | Q ≥ 40 ms     | 1        | Q ≥ 40 ms       | 1   | Q ≥ 40 ms        | 1   | Q ≥ 30 ms      | 1   |
| aVF          | Q ≥ 50 ms       | 3   | Q ≥ 50 ms     | 3        | Q ≥ 50 ms       | 3   | Q ≥ 60 ms        | 3   | Q ≥ 50 ms      | 3   |
|              | Q ≥ 40 ms       | 2   | Q ≥ 40 ms     | 2        | Q ≥ 40 ms       | 2   | Q ≥ 50 ms        | 2   | Q ≥ 40 ms      | 2   |
|              | Q ≥ 30 ms       | 1   | Q ≥ 30 ms     | 1        | Q ≥ 30 ms       | 1   | Q ≥ 40 ms        | 1   | Q ≥ 30 ms      | 1   |
| V1           | Q ≥ 50 ms       | 2   | Q ≥ 50 ms     | 2        | Q ≥ 50 ms       | 2   | any QR           | 2   | Q ≥ 50 ms      | 2   |
|              | any Q           | 1   | any QR        | 1        | any Q           | 1   | (or any Q if *)  | 1   | any Q          | 1   |
|              | Init R ≤ 2.0 mV |     |               |          |                 |     | NtchInit40       |     |                |     |
| V1 Post.**   | Init R ≥ 60 ms  | 2   | R ≥ 50 ms     | 2        | Init R ≥ 60 ms  | 2   | R ≥ 50 ms        | 2   | R ≥ 50 ms      | 2   |
|              | Init R ≥ 15 mV  |     | R ≥ 1mV       |          | Init R ≥ 15 mV  |     | R ≥ 1mV          |     | R ≥ 1mV        |     |
|              | Init R ≥ 50 ms  | 1   | R ≥ 40 ms     | 1        | Init R ≥ 50 ms  | 1   | R ≥ 40 ms        | 1   | R ≥ 40 ms      | 1   |
| V2           | Q ≥ 50 ms       | 2   | Q ≥ 50 ms     | 2        | Q ≥ 50 ms       | 2   | any QR           | 2   | any Q          | 2   |
|              | any Q           | 1   | any QR        | 1        | any Q           | 1   | (or any Q if *)  | 1   | any Q          | 1   |
|              | R ≤ 10 ms       |     | R ≤ 10 ms     |          | R ≤ 10 ms       |     | NtchInit40       |     | R ≤ 10 ms      |     |
| V2 Post.**   | Init R ≥ 70 ms  | 2   | R ≥ 60 ms     | 2        | Init R ≥ 70 ms  | 2   | R ≥ 60 ms        | 2   | R ≥ 60 ms      | 2   |
|              | Init R ≥ 2.5 mV |     | R ≥ 2 mV      |          | Init R ≥ 2.5 mV |     | R ≥ 2 mV         |     | R ≥ 2 mV       |     |
|              | Init R ≥ 50 ms  | 1   | R ≥ 50 ms     | 1        | Init R ≥ 50 ms  | 1   | R ≥ 50 ms        | 1   | R ≥ 50 ms      | 1   |
| V3           | Q ≥ 30 ms       | 2   | Q ≥ 30 ms     | 2        | Q ≥ 30 ms       | 2   | QR & (Q ≥ 30 ms) | 2   | Q ≥ 30 ms      | 2   |
|              | R ≤ 10 ms       |     | R ≤ 10 ms     |          | R ≤ 10 ms       |     | NtchInit40       |     | R ≤ 10 ms      |     |
|              | Q ≥ 20 ms       | 1   | Q ≥ 20 ms     | 1        | Q ≥ 20 ms       | 1   | any QR           | 1   | Q ≥ 20 ms      | 1   |
| V4           | Q ≥ 20 ms       | 1   | Q ≥ 20 ms     | 1        | Q ≥ 20 ms       | 1   | any QR           | 1   | Q ≥ 20 ms      | 1   |
|              | R/Q ≤ 0.5       | 2   | R/Q ≤ 0.5     | 2        | R/Q ≤ 0.5       | 2   | (or any Q if *)  | 2   | R/Q ≤ 0.5      | 2   |
|              | R/S ≤ 0.5       |     | R/S ≤ 0.5     |          | R/S ≤ 0.5       |     |                  |     | R/S ≤ 0.5      |     |
| V5           | Q ≥ 30 ms       | 1   | Q ≥ 30 ms     | 1        | Q ≥ 30 ms       | 1   | Q ≥ 30 ms        | 1   | Q ≥ 30 ms      | 1   |
|              | R/Q ≤ 1         | 2   | R/Q ≤ 1       | 2        | R/Q ≤ 1         | 2   | R/Q ≤ 1          | 2   | R/Q ≤ 1        | 2   |
|              | R/S ≤ 1         |     | R/S ≤ 1       |          | R/S ≤ 1         |     | R/S ≤ 1          |     | R/S ≤ 1        |     |
| V6           | Q ≥ 30 ms       | 1   | Q ≥ 30 ms     | 1        | Q ≥ 30 ms       | 1   | Q ≥ 30 ms        | 1   | Q ≥ 30 ms      | 1   |
|              | R/Q ≤ 1         | 2   | R/Q ≤ 1       | 2        | R/Q ≤ 1         | 2   | R/Q ≤ 1          | 2   | R/Q ≤ 1        | 2   |
|              | R/S ≤ 1         |     | R/S ≤ 1       |          | R/S ≤ 1         |     | R/S ≤ 1          |     | R/S ≤ 1        |     |
| <b>Total</b> | <b>Points</b>   |     | <b>Points</b> | <b>8</b> | <b>Points</b>   |     | <b>Points</b>    |     | <b>Points</b>  |     |

| Lead         | LBBB          |     |
|--------------|---------------|-----|
|              | Criteria      | Pts |
| I            | any Q         | 1   |
|              | R/Q ≤ 1       | 2   |
|              | R/S ≤ 1       |     |
| II           | R/Q ≤ 15      | 1   |
|              | R/S ≤ 15      |     |
|              | Q ≥ 40 ms     | 2   |
| aVL          | Q ≥ 30 ms     | 1   |
|              | R/Q ≤ 0.5     | 1   |
|              | R/S ≤ 0.5     |     |
| aVF          | Q ≥ 50 ms     | 2   |
|              | Q ≥ 40 ms     | 1   |
|              | R/Q ≤ 0.5     | 1   |
| V1           | R/S ≤ 0.5     | 2   |
|              | R/Q ≤ 0.5     |     |
|              | R/S ≤ 1       | 1   |
| aVF          | R/Q ≤ 1       | 1   |
|              | Q ≥ 50 ms     | 2   |
|              | Q ≥ 40 ms     | 1   |
| V1 Ant.***   | R ≥ 0.3 mV    | 2   |
|              | R ≥ 30 ms     |     |
|              | R ≥ 0.2 mV    | 1   |
| V1 Post      | R ≥ 20 ms     | 1   |
|              | S/S' ≥ 2.0    | 3   |
|              | S/S' ≥ 15     | 2   |
| V2           | S/S' ≥ 125    | 1   |
|              | NchInit40     | 1   |
|              | R ≥ 0.4 mV    | 2   |
| V2 Ant.***   | R ≥ 30 ms     |     |
|              | R ≥ 0.3 mV    | 1   |
|              | R ≥ 20 ms     |     |
| V2 Post      | S/S' ≥ 2.5    | 3   |
|              | S/S' ≥ 2.0    | 2   |
|              | S/S' ≥ 15     | 1   |
| V5           | any Q         | 1   |
|              | R/R' ≥ 2      | 2   |
|              | R/R' ≥ 1      | 1   |
| V6           | R/S ≤ 2       | 1   |
|              | R/S ≤ 2       |     |
|              | R/S ≤ 1       | 1   |
| <b>Total</b> | <b>Points</b> |     |

%LV infarct       
 (3 \* #pts)

%LV infarct      %LV infarct 24 %LV infarct      %LV infarct      %LV infarct       
 (3 x #pts) (3 x #pts) (3 x #pts) (3 x #pts) (3 x #pts)

\* (for LVH) if ≥4 other points in leads I, aVL, V4, V5 or V6 then count QS in V1+V3  
 \*\* (RAO) if P positive amp in V1 ≥ 0.1mV or aVF P ≥ 0.175 mV, then exclude V1-V2 R-criteria points  
 \*\*\* (RAO) if P positive amp in V1 ≥ 0.1mV or aVF P ≥ 0.175 mV, then exclude V1-V2 R-criteria points

|                         |         |                               |       |                              |                       |
|-------------------------|---------|-------------------------------|-------|------------------------------|-----------------------|
| <b>Patient ID:</b>      | 15      | <b>QRS Duration:</b>          | 154ms | <b>Amplitude Adjustment:</b> | -4%                   |
| <b>Age &amp; Sex:</b>   | 59 Male | <b>QRS Axis:</b>              | 0°    | <b>Duration Adjustment:</b>  | 0%                    |
| <b>Conduction Type:</b> | LBBB    | <b>Right Atrial Overload:</b> | No    | <b>Total Points</b>          | 10 points (30 points) |

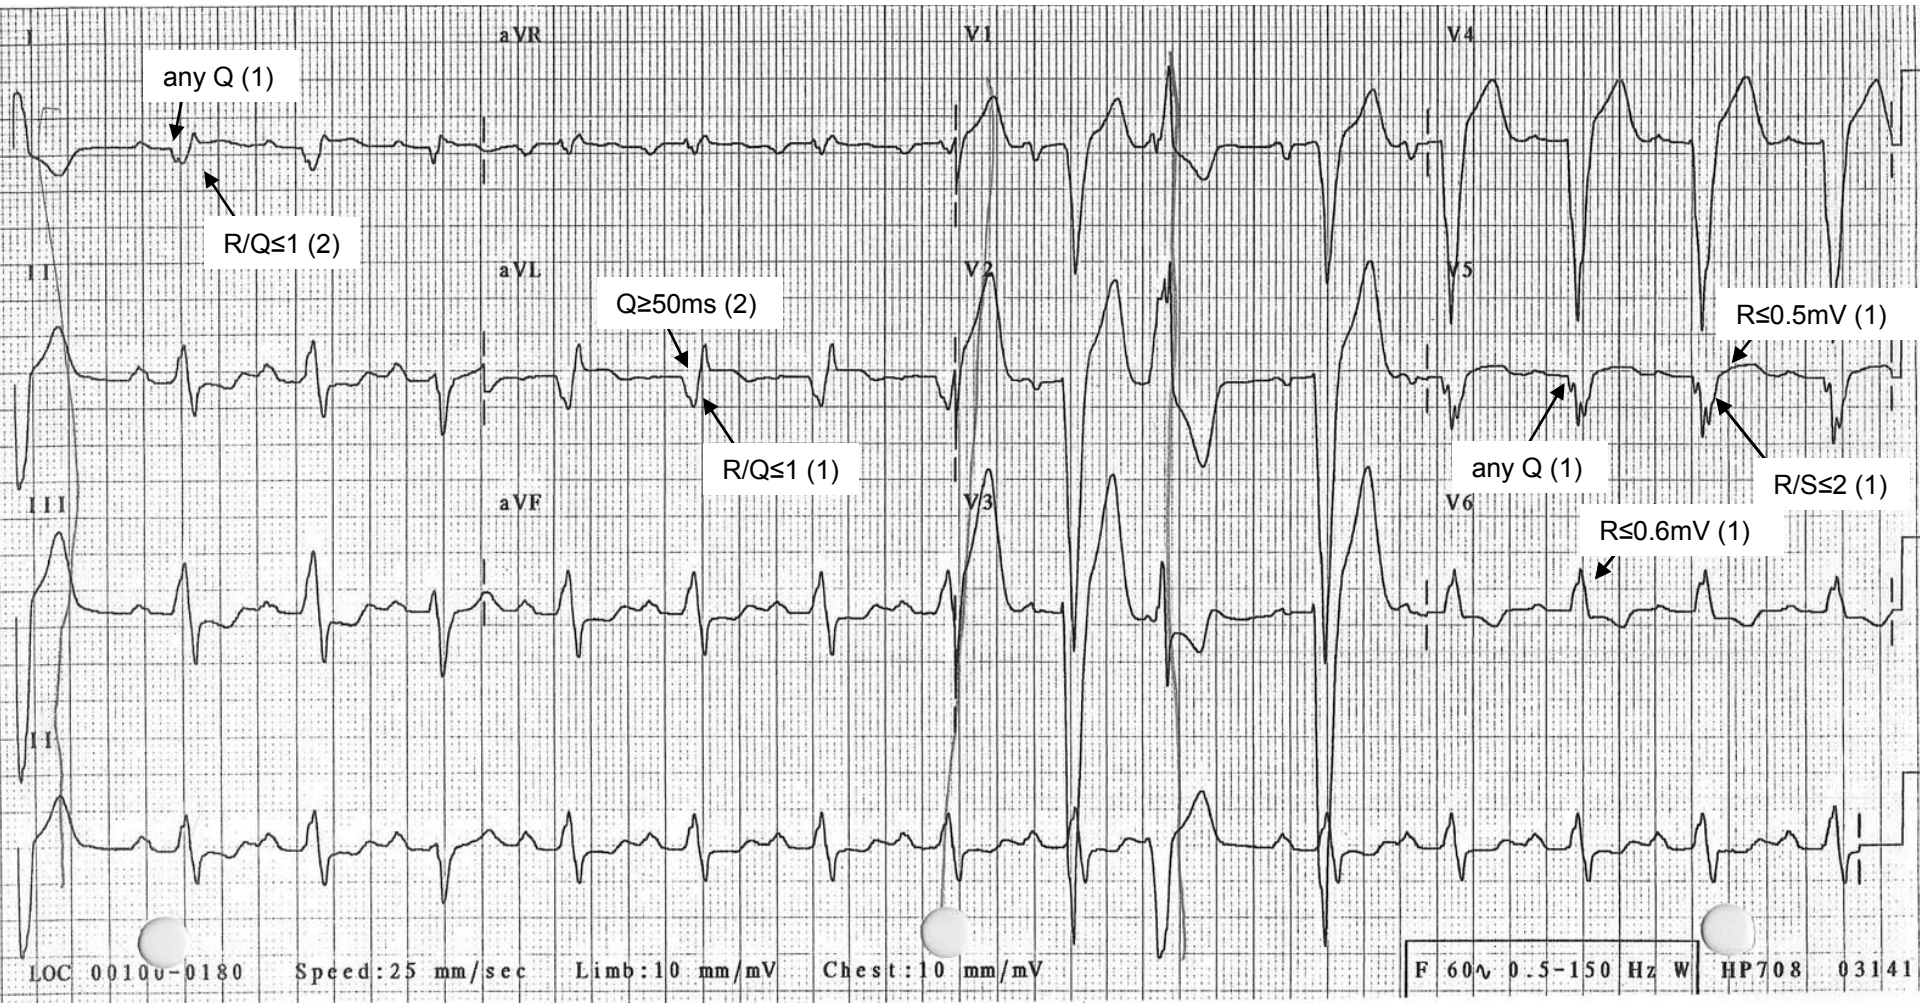

QRS Scoring

Patient ID 15

QRS duration 154ms

Amplitude adjust -4%

(↑1%/yr age 20-54; ↓1%/yr >55 yrs; ↓ 10% for females)

Age & gender 59 Male

QRS axis 0°

Duration adjust 0% RAO(\*\*, \*\*\*) Yes  No

(↓ 10% for females)

|              | RBBB                                                                                  |                                 | LAFB                                                                                  |                                 | LAFB + RBBB                                                                           |                                 | LVH                                                                                   |                                 | No Confounders                                                                        |                                 |
|--------------|---------------------------------------------------------------------------------------|---------------------------------|---------------------------------------------------------------------------------------|---------------------------------|---------------------------------------------------------------------------------------|---------------------------------|---------------------------------------------------------------------------------------|---------------------------------|---------------------------------------------------------------------------------------|---------------------------------|
| Lead         | Criteria                                                                              | Pts                             |
| I            | Q ≥ 30 ms<br>R/Q ≤ 1<br>R ≤ 0.2 mV                                                    | 1                               | Q ≥ 30 ms<br>R/Q ≤ 1<br>R ≤ 0.2 mV                                                    | 1                               | Q ≥ 30 ms<br>R/Q ≤ 1<br>R ≤ 0.2 mV                                                    | 1                               | Q ≥ 30 ms<br>R/Q ≤ 1<br>R ≤ 0.2 mV                                                    | 1                               | Q ≥ 30 ms<br>R/Q ≤ 1<br>R ≤ 0.2 mV                                                    | 1                               |
| II           | Q ≥ 40 ms<br>Q ≥ 30 ms                                                                | 2                               | Q ≥ 40 ms<br>Q ≥ 30 ms                                                                | 2                               | Q ≥ 40 ms<br>Q ≥ 30 ms                                                                | 2                               | Q ≥ 40 ms<br>Q ≥ 30 ms                                                                | 2                               | Q ≥ 40 ms<br>Q ≥ 30 ms                                                                | 2                               |
| aVL          | Q ≥ 30 ms<br>R/Q ≤ 1                                                                  | 1                               | Q ≥ 40 ms<br>R/Q ≤ 1                                                                  | 1                               | Q ≥ 40 ms<br>R/Q ≤ 1                                                                  | 1                               | Q ≥ 40 ms<br>R/Q ≤ 1                                                                  | 1                               | Q ≥ 30 ms<br>R/Q ≤ 1                                                                  | 1                               |
| aVF          | Q ≥ 50 ms<br>Q ≥ 40 ms<br>Q ≥ 30 ms<br>R/Q ≤ 1<br>R/Q ≤ 2                             | 3<br>2<br>1<br>2<br>1           | Q ≥ 50 ms<br>Q ≥ 40 ms<br>Q ≥ 30 ms<br>R/Q ≤ 1<br>R/Q ≤ 2                             | 3<br>2<br>1<br>2<br>1           | Q ≥ 50 ms<br>Q ≥ 40 ms<br>Q ≥ 30 ms<br>R/Q ≤ 1<br>R/Q ≤ 2                             | 3<br>2<br>1<br>2<br>1           | Q ≥ 60 ms<br>Q ≥ 50 ms<br>Q ≥ 40 ms<br>R/Q ≤ 1<br>R/Q ≤ 2                             | 3<br>2<br>1<br>2<br>1           | Q ≥ 50 ms<br>Q ≥ 40 ms<br>Q ≥ 30 ms<br>R/Q ≤ 1<br>R/Q ≤ 2                             | 3<br>2<br>1<br>2<br>1           |
| V1           | Q ≥ 50 ms<br>any Q<br>Init R ≤ 2.0 ms                                                 | 2<br>1<br>1                     | Q ≥ 50 ms<br>any QR                                                                   | 2<br>1                          | Q ≥ 50 ms<br>any Q<br>NtchInit40                                                      | 2<br>1<br>1                     | any QR<br>(or any Q if *)<br>NtchInit40                                               | 2<br>1<br>1                     | any Q                                                                                 | 1                               |
| V1 Post.**   | Init R ≥ 60 ms<br>Init R ≥ 15 mV<br>Init R ≥ 50 ms<br>Init R ≥ 10 mV                  | 2<br>1<br>1<br>1                | R/S ≥ 1<br>R ≥ 50 ms<br>R ≥ 1 mV<br>R ≥ 40 ms<br>R ≥ 0.7 mV                           | 1<br>2<br>1<br>1<br>1           | Init R ≥ 60 ms<br>Init R ≥ 15 mV<br>Init R ≥ 50 ms<br>Init R ≥ 10 mV                  | 2<br>1<br>1<br>1                | R/S ≥ 1<br>R ≥ 50 ms<br>R ≥ 1 mV<br>R ≥ 40 ms<br>R ≥ 0.7 mV                           | 1<br>2<br>1<br>1<br>1           | R/S ≥ 1<br>R ≥ 50 ms<br>R ≥ 1 mV<br>R ≥ 40 ms<br>R ≥ 0.7 mV                           | 1<br>2<br>1<br>1<br>1           |
| V2           | Q ≥ 50 ms<br>any Q<br>R ≤ 10 ms<br>R ≤ 0.1 mV                                         | 2<br>1<br>1<br>1                | any QR<br>R ≤ 10 ms<br>R ≤ 0.1 mV                                                     | 1<br>1<br>1                     | Q ≥ 50 ms<br>any Q<br>R ≤ 10 ms<br>R ≤ 0.1 mV                                         | 2<br>1<br>1<br>1                | any QR<br>(or any Q if *)<br>NtchInit40                                               | 1<br>1<br>1                     | any Q<br>R ≤ 10 ms<br>R ≤ 0.1 mV                                                      | 1<br>1<br>1                     |
| V2 Post.**   | Init R ≥ 70 ms<br>Init R ≥ 2.5 mV<br>Init R ≥ 50 ms<br>Init R ≥ 2.0 mV                | 2<br>1<br>1<br>1                | R/S ≥ 15<br>R ≥ 60 ms<br>R ≥ 2 mV<br>R ≥ 50 ms<br>R ≥ 15 mV                           | 1<br>2<br>1<br>1<br>1           | Init R ≥ 70 ms<br>Init R ≥ 2.5 mV<br>Init R ≥ 50 ms<br>Init R ≥ 2.0 mV                | 2<br>1<br>1<br>1                | R/S ≥ 15<br>R ≥ 60 ms<br>R ≥ 2 mV<br>R ≥ 50 ms<br>R ≥ 15 mV                           | 1<br>2<br>1<br>1<br>1           | R/S ≥ 15<br>R ≥ 60 ms<br>R ≥ 2 mV<br>R ≥ 50 ms<br>R ≥ 15 mV                           | 1<br>2<br>1<br>1<br>1           |
| V3           | Q ≥ 30 ms<br>R ≤ 10 ms<br>Q ≥ 20 ms<br>R ≤ 20 ms                                      | 2<br>1<br>1<br>1                | Q ≥ 30 ms<br>R ≤ 10 ms<br>Q ≥ 20 ms<br>R ≤ 20 ms                                      | 2<br>1<br>1<br>1                | Q ≥ 30 ms<br>R ≤ 10 ms<br>Q ≥ 20 ms<br>R ≤ 20 ms                                      | 2<br>1<br>1<br>1                | QR & (Q ≥ 30 ms)<br>NtchInit40<br>any QR<br>(or any Q if *)                           | 2<br>1<br>1<br>1                | Q ≥ 30 ms<br>R ≤ 10 ms<br>Q ≥ 20 ms<br>R ≤ 20 ms                                      | 2<br>1<br>1<br>1                |
| V4           | Q ≥ 20 ms<br>R/Q ≤ 0.5<br>R/S ≤ 0.5<br>R/Q ≤ 1<br>R/S ≤ 1<br>R ≤ 0.5 mV<br>NtchInit40 | 1<br>2<br>1<br>1<br>1<br>1<br>1 | Q ≥ 20 ms<br>R/Q ≤ 0.5<br>R/S ≤ 0.5<br>R/Q ≤ 1<br>R/S ≤ 1<br>R ≤ 0.5 mV<br>NtchInit40 | 1<br>2<br>1<br>1<br>1<br>1<br>1 | Q ≥ 20 ms<br>R/Q ≤ 0.5<br>R/S ≤ 0.5<br>R/Q ≤ 1<br>R/S ≤ 1<br>R ≤ 0.5 mV<br>NtchInit40 | 1<br>2<br>1<br>1<br>1<br>1<br>1 | Q ≥ 20 ms<br>R/Q ≤ 0.5<br>R/S ≤ 0.5<br>R/Q ≤ 1<br>R/S ≤ 1<br>R ≤ 0.5 mV<br>NtchInit40 | 1<br>2<br>1<br>1<br>1<br>1<br>1 | Q ≥ 20 ms<br>R/Q ≤ 0.5<br>R/S ≤ 0.5<br>R/Q ≤ 1<br>R/S ≤ 1<br>R ≤ 0.5 mV<br>NtchInit40 | 1<br>2<br>1<br>1<br>1<br>1<br>1 |
| V5           | Q ≥ 30 ms<br>R/Q ≤ 1<br>R/S ≤ 1<br>R/Q ≤ 2<br>R/S ≤ 2<br>R ≤ 0.6 mV<br>NtchInit40     | 1<br>2<br>1<br>1<br>1<br>1<br>1 | Q ≥ 30 ms<br>R/Q ≤ 1<br>R/S ≤ 1<br>R/Q ≤ 2<br>R/S ≤ 15<br>R ≤ 0.6 mV<br>NtchInit40    | 1<br>2<br>1<br>1<br>1<br>1<br>1 | Q ≥ 30 ms<br>R/Q ≤ 1<br>R/S ≤ 1<br>R/Q ≤ 2<br>R/S ≤ 15<br>R ≤ 0.6 mV<br>NtchInit40    | 1<br>2<br>1<br>1<br>1<br>1<br>1 | Q ≥ 30 ms<br>R/Q ≤ 1<br>R/S ≤ 1<br>R/Q ≤ 2<br>R/S ≤ 2<br>R ≤ 0.6 mV<br>NtchInit40     | 1<br>2<br>1<br>1<br>1<br>1<br>1 | Q ≥ 30 ms<br>R/Q ≤ 1<br>R/S ≤ 1<br>R/Q ≤ 2<br>R/S ≤ 2<br>R ≤ 0.6 mV<br>NtchInit40     | 1<br>2<br>1<br>1<br>1<br>1<br>1 |
| V6           | Q ≥ 30 ms<br>R/Q ≤ 1<br>R/S ≤ 1<br>R/Q ≤ 3<br>R/S ≤ 3<br>R ≤ 0.6 mV<br>NtchInit40     | 1<br>2<br>1<br>1<br>1<br>1<br>1 | Q ≥ 30 ms<br>R/Q ≤ 1<br>R/S ≤ 1<br>R/Q ≤ 3<br>R/S ≤ 2<br>R ≤ 0.6 mV<br>NtchInit40     | 1<br>2<br>1<br>1<br>1<br>1<br>1 | Q ≥ 30 ms<br>R/Q ≤ 1<br>R/S ≤ 1<br>R/Q ≤ 3<br>R/S ≤ 2<br>R ≤ 0.6 mV<br>NtchInit40     | 1<br>2<br>1<br>1<br>1<br>1<br>1 | Q ≥ 30 ms<br>R/Q ≤ 1<br>R/S ≤ 1<br>R/Q ≤ 3<br>R/S ≤ 3<br>R ≤ 0.6 mV<br>NtchInit40     | 1<br>2<br>1<br>1<br>1<br>1<br>1 | Q ≥ 30 ms<br>R/Q ≤ 1<br>R/S ≤ 1<br>R/Q ≤ 3<br>R/S ≤ 3<br>R ≤ 0.6 mV<br>NtchInit40     | 1<br>2<br>1<br>1<br>1<br>1<br>1 |
| <b>Total</b> | <b>Points</b>                                                                         |                                 |

%LV infarct (3 x #pts)    %LV infarct (3 x #pts)

\* (for LVH) if ≥ 4 other points in leads I, aVL, V4, V5 or V6 then count QS in V1+V3

\*\* (RAO) if P positive amp in V1 ≥ 0.1 mV or aVF P ≥ 0.175 mV, then exclude V1-V2 R-criteria points

| LBBB         |                                                            |                       |
|--------------|------------------------------------------------------------|-----------------------|
| Lead         | Criteria                                                   | Pts                   |
| I            | any Q<br>R/Q ≤ 1<br>R/S ≤ 3                                | 1<br>2<br>1           |
| II           | Q ≥ 40 ms<br>Q ≥ 30 ms                                     | 2<br>1                |
| aVL          | Q ≥ 50 ms<br>Q ≥ 40 ms<br>R/S ≤ 0.5<br>R/Q ≤ 1             | 2<br>1<br>1<br>2      |
| aVF          | Q ≥ 50 ms<br>Q ≥ 40 ms<br>R/Q ≤ 0.5<br>R/S ≤ 0.5           | 2<br>1<br>1<br>1      |
| V1           | NtchInit40                                                 | 1                     |
| V1 Ant.***   | R ≥ 0.3 mV<br>R ≥ 30 ms<br>R ≥ 0.2 mV<br>R ≥ 20 ms         | 2<br>1<br>1<br>1      |
| V1 Post      | S/S' ≥ 2.0<br>S/S' ≥ 1.5<br>S/S' ≥ 125                     | 3<br>2<br>1           |
| V2           | NtchInit40                                                 | 1                     |
| V2 Ant.***   | R ≥ 0.4 mV<br>R ≥ 30 ms<br>R ≥ 0.3 mV<br>R ≥ 20 ms         | 2<br>1<br>1<br>1      |
| V2 Post      | S/S' ≥ 2.5<br>S/S' ≥ 2.0<br>S/S' ≥ 15                      | 3<br>2<br>1           |
| V5           | any Q<br>R/R' ≥ 2<br>R/R' ≥ 1<br>R/S ≤ 2<br>R ≤ 0.5 mV     | 1<br>2<br>1<br>1<br>1 |
| V6           | Q ≥ 20 ms<br>R/R' ≥ 2<br>R/R' ≥ 1<br>R/S ≤ 2<br>R ≤ 0.6 mV | 1<br>2<br>1<br>1<br>1 |
| <b>Total</b> | <b>Points</b>                                              | <b>10</b>             |

%LV infarct (3 x #pts) 30

\*\*\* (RAO) if P positive amp in V1 ≥ 0.1 mV or aVF P ≥ 0.175 mV, then exclude V1-V2 R-criteria points

|                         |         |                               |       |                              |                |
|-------------------------|---------|-------------------------------|-------|------------------------------|----------------|
| <b>Patient ID:</b>      | 16      | <b>QRS Duration:</b>          | 146ms | <b>Amplitude Adjustment:</b> | -1%            |
| <b>Age &amp; Sex:</b>   | 56 Male | <b>QRS Axis:</b>              | +88°  | <b>Duration Adjustment:</b>  | 0%             |
| <b>Conduction Type:</b> | RBBB    | <b>Right Atrial Overload:</b> | No    | <b>Total Points</b>          | 7 points (21%) |

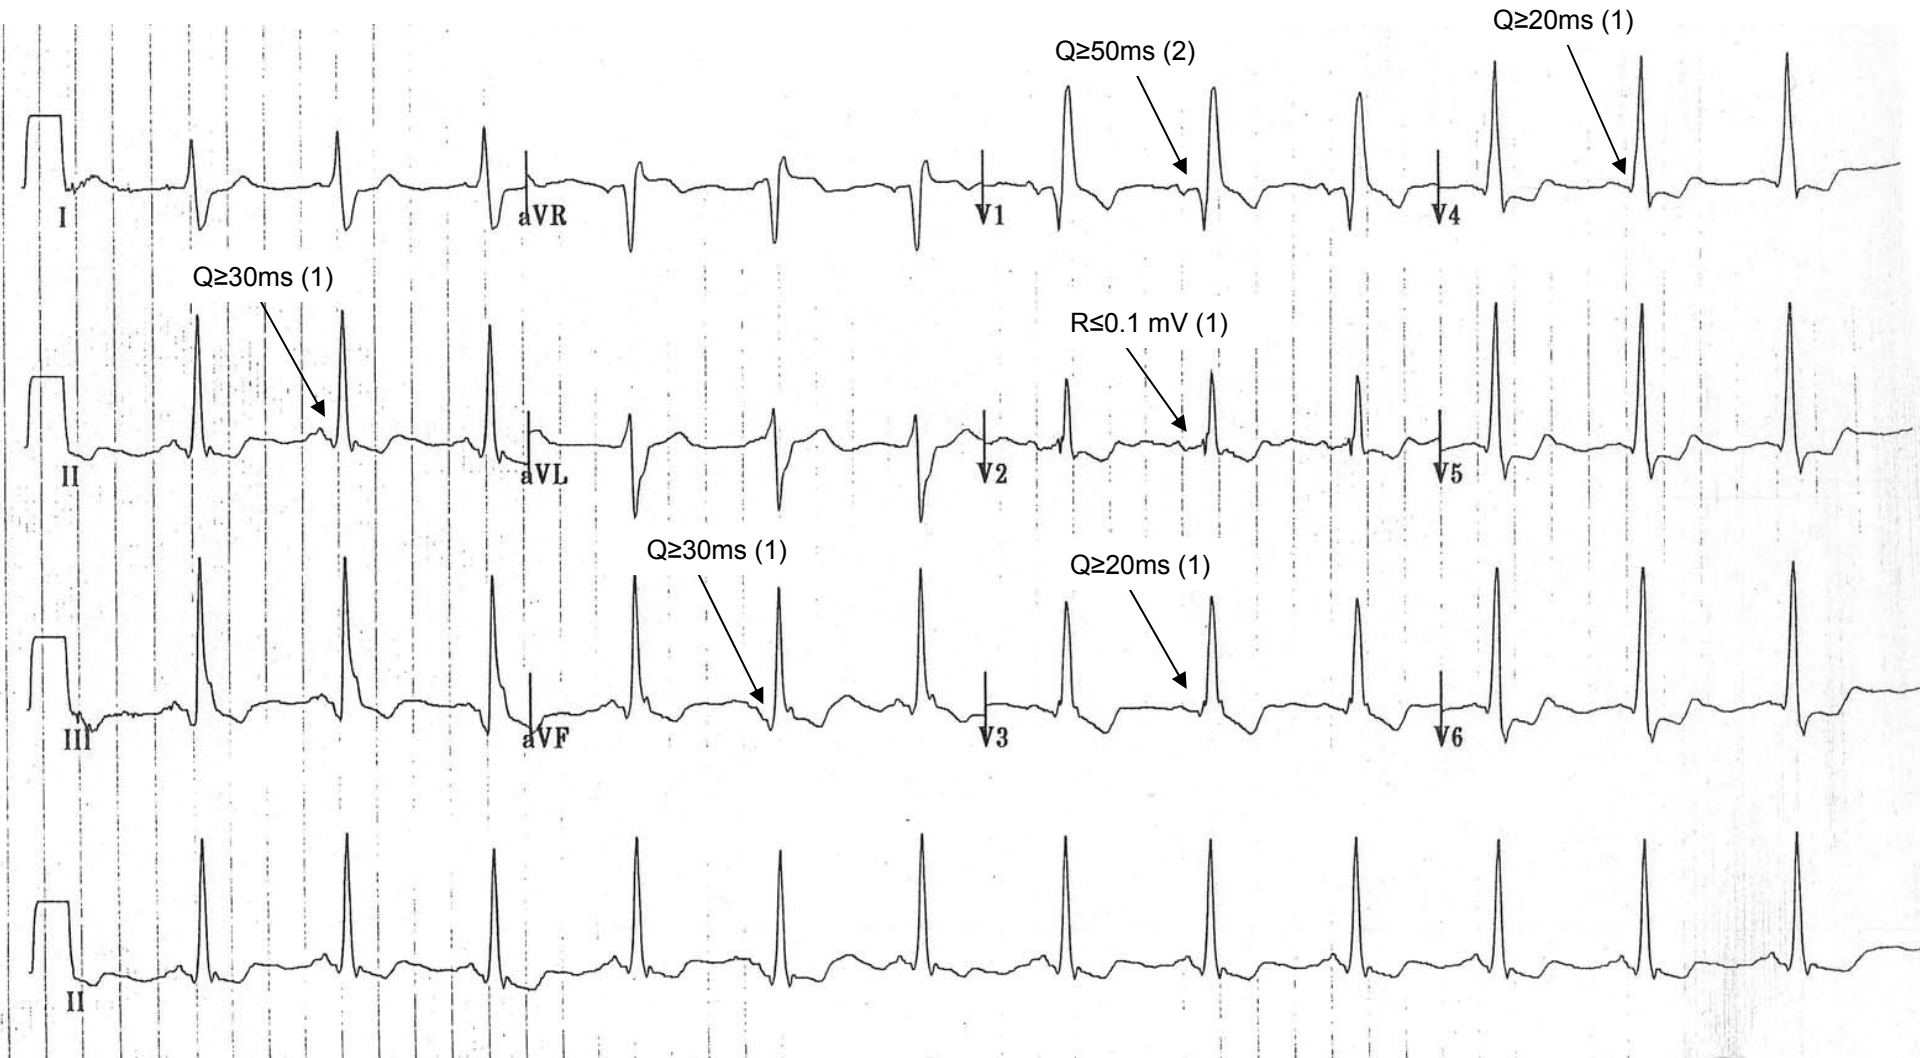

QRS Scoring

Patient ID 16

QRS duration 146ms

Amplitude adjust -1%

(↑1%/yr age 20-54; ↓1%/yr >55 yrs; ↓ 10% for females)

Age & gender 56 Male

QRS axis +88°

Duration adjust 0%

RAO(\*\*, \*\*\*) Yes/No (No)  
(↓ 10% for females)

| Lead    | RBBB            |     | LAFB          |     | LAFB + RBBB     |     | LVH             |     | No Confounders |     |
|---------|-----------------|-----|---------------|-----|-----------------|-----|-----------------|-----|----------------|-----|
|         | Criteria        | Pts | Criteria      | Pts | Criteria        | Pts | Criteria        | Pts | Criteria       | Pts |
| I       | Q ≥ 30 ms       | 1   | Q ≥ 30 ms     | 1   | Q ≥ 30 ms       | 1   | Q ≥ 30 ms       | 1   | Q ≥ 30 ms      | 1   |
|         | R/Q ≤ 1         | 1   | R/Q ≤ 1       | 1   | R/Q ≤ 1         | 1   | R/Q ≤ 1         | 1   | R/Q ≤ 1        | 1   |
|         | R ≤ 0.2 mV      |     | R ≤ 0.2 mV    |     | R ≤ 0.2 mV      |     | R ≤ 0.2 mV      |     | R ≤ 0.2 mV     |     |
| II      | Q ≥ 40 ms       | 2   | Q ≥ 40 ms     | 2   | Q ≥ 40 ms       | 2   | Q ≥ 40 ms       | 2   | Q ≥ 40 ms      | 2   |
|         | Q ≥ 30 ms       | 1   | Q ≥ 30 ms     | 1   | Q ≥ 30 ms       | 1   | Q ≥ 30 ms       | 1   | Q ≥ 30 ms      | 1   |
|         | R/Q ≤ 1         | 1   | R/Q ≤ 1       | 1   | R/Q ≤ 1         | 1   | R/Q ≤ 1         | 1   | R/Q ≤ 1        | 1   |
| aVL     | Q ≥ 30 ms       | 1   | Q ≥ 40 ms     | 1   | Q ≥ 40 ms       | 1   | Q ≥ 40 ms       | 1   | Q ≥ 30 ms      | 1   |
|         | R/Q ≤ 1         | 1   | R/Q ≤ 1       | 1   | R/Q ≤ 1         | 1   | R/Q ≤ 1         | 1   | R/Q ≤ 1        | 1   |
|         | R/S ≤ 1         |     | R/S ≤ 1       |     | R/S ≤ 1         |     | R/S ≤ 1         |     | R/S ≤ 1        |     |
| aVF     | Q ≥ 50 ms       | 3   | Q ≥ 50 ms     | 3   | Q ≥ 50 ms       | 3   | Q ≥ 60 ms       | 3   | Q ≥ 50 ms      | 3   |
|         | Q ≥ 40 ms       | 2   | Q ≥ 40 ms     | 2   | Q ≥ 40 ms       | 2   | Q ≥ 50 ms       | 2   | Q ≥ 40 ms      | 2   |
|         | Q ≥ 30 ms       | 1   | Q ≥ 30 ms     | 1   | Q ≥ 30 ms       | 1   | Q ≥ 40 ms       | 1   | Q ≥ 30 ms      | 1   |
| V1      | R/Q ≤ 1         | 2   | R/Q ≤ 1       | 2   | R/Q ≤ 1         | 2   | R/Q ≤ 1         | 2   | R/Q ≤ 1        | 2   |
|         | R/Q ≤ 2         | 1   | R/Q ≤ 2       | 1   | R/Q ≤ 2         | 1   | R/Q ≤ 2         | 1   | R/Q ≤ 2        | 1   |
|         | Q ≥ 50 ms       | 2   | Q ≥ 50 ms     | 2   | Q ≥ 50 ms       | 2   | any QR          | 1   | any QR         | 1   |
| Ant.    | any Q           | 1   | any QR        | 1   | any Q           | 1   | (or any Q if *) | 1   | any Q          | 1   |
|         | Init R ≤ 2.0 mV |     |               |     |                 |     | NtchInit40      |     |                |     |
|         | Init R ≥ 60 ms  | 2   | R ≥ 50 ms     | 2   | Init R ≥ 60 ms  | 2   | R ≥ 50 ms       | 2   | R ≥ 50 ms      | 2   |
| Post.** | Init R ≥ 15 mV  | 1   | R ≥ 1mV       | 1   | Init R ≥ 15 mV  | 1   | R ≥ 1mV         | 1   | R ≥ 1mV        | 1   |
|         | Init R ≥ 50 ms  | 1   | R ≥ 40 ms     | 1   | Init R ≥ 50 ms  | 1   | R ≥ 40 ms       | 1   | R ≥ 40 ms      | 1   |
|         | Init R ≥ 10 mV  |     | R ≥ 0.7 mV    |     | Init R ≥ 10 mV  |     | R ≥ 0.7 mV      |     | R ≥ 0.7 mV     |     |
| V2      | Q ≥ 50 ms       | 2   | Qs0.2&Ss0.2mV | 1   | Q ≥ 50 ms       | 2   | Qs0.2&Ss0.2 mV  | 1   | Qs0.2&Ss0.2mV  | 1   |
|         | any Q           | 1   | any QR        | 1   | any Q           | 1   | any QR          | 1   | any Q          | 1   |
|         | R ≤ 10 ms       |     | R ≤ 10ms      |     | R ≤ 10 ms       |     | (or any Q if *) |     | R ≤ 10ms       |     |
| V2      | R ≤ 0.1mV       |     | R ≤ 0.1mV     |     | R ≤ 0.1mV       |     | NtchInit40      |     | R ≤ 0.1mV      |     |
|         | Init R ≥ 70 ms  | 2   | R ≥ 60 ms     | 2   | Init R ≥ 70 ms  | 2   | R ≥ 60 ms       | 2   | R ≥ 60 ms      | 2   |
|         | Init R ≥ 2.5 mV |     | R ≥ 2 mV      |     | Init R ≥ 2.5 mV |     | R ≥ 2 mV        |     | R ≥ 2 mV       |     |
| Post.** | Init R ≥ 50 ms  | 1   | R ≥ 50 ms     | 1   | Init R ≥ 50 ms  | 1   | R ≥ 50 ms       | 1   | R ≥ 50 ms      | 1   |
|         | Init R ≥ 2.0 mV |     | R ≥ 15 mV     |     | Init R ≥ 2.0 mV |     | R ≥ 15 mV       |     | R ≥ 15 mV      |     |
|         | Qs0.3&Ss0.3mV   | 1   | Qs0.3&Ss0.3mV | 1   | Qs0.3&Ss0.3mV   | 1   | Qs0.3&Ss0.3mV   | 1   | Qs0.3&Ss0.3mV  | 1   |
| V3      | Q ≥ 30 ms       | 2   | Q ≥ 30 ms     | 2   | Q ≥ 30 ms       | 2   | QR&(Q ≥ 30 ms)  | 2   | Q ≥ 30 ms      | 2   |
|         | R ≤ 10 ms       |     | R ≤ 10 ms     |     | R ≤ 10 ms       |     | NtchInit40      |     | R ≤ 10 ms      |     |
|         | Q ≥ 20 ms       | 1   | Q ≥ 20 ms     | 1   | Q ≥ 20 ms       | 1   | any QR          | 1   | Q ≥ 20 ms      | 1   |
| V4      | R ≤ 20 ms       |     | R ≤ 20 ms     |     | R ≤ 20 ms       |     | (or any Q if *) |     | R ≤ 20 ms      |     |
|         | Q ≥ 20 ms       | 1   | Q ≥ 20 ms     | 1   | Q ≥ 20 ms       | 1   | Q ≥ 20 ms       | 1   | Q ≥ 20 ms      | 1   |
|         | R/Q ≤ 0.5       | 2   | R/Q ≤ 0.5     | 2   | R/Q ≤ 0.5       | 2   | R/Q ≤ 0.5       | 2   | R/Q ≤ 0.5      | 2   |
| V5      | R/S ≤ 0.5       |     | R/S ≤ 0.5     |     | R/S ≤ 0.5       |     | R/S ≤ 0.5       |     | R/S ≤ 0.5      |     |
|         | R/Q ≤ 1         | 1   | R/Q ≤ 1       | 1   | R/Q ≤ 1         | 1   | R/Q ≤ 1         | 1   | R/Q ≤ 1        | 1   |
|         | R/S ≤ 1         |     | R/S ≤ 1       |     | R/S ≤ 1         |     | R/S ≤ 1         |     | R/S ≤ 1        |     |
| V6      | R ≤ 0.5 mV      |     | R ≤ 0.5 mV    |     | R ≤ 0.5 mV      |     | R ≤ 0.5 mV      |     | R ≤ 0.5 mV     |     |
|         | NtchInit40      |     | NtchInit40    |     | NtchInit40      |     | NtchInit40      |     | NtchInit40     |     |
|         | Q ≥ 30 ms       | 1   | Q ≥ 30 ms     | 1   | Q ≥ 30 ms       | 1   | Q ≥ 30 ms       | 1   | Q ≥ 30 ms      | 1   |
| Total   | R/Q ≤ 1         | 2   | R/Q ≤ 1       | 2   | R/Q ≤ 1         | 2   | R/Q ≤ 1         | 2   | R/Q ≤ 1        | 2   |
|         | R/S ≤ 1         |     | R/S ≤ 1       |     | R/S ≤ 1         |     | R/S ≤ 1         |     | R/S ≤ 1        |     |
|         | R/Q ≤ 2         | 1   | R/Q ≤ 2       | 1   | R/Q ≤ 2         | 1   | R/Q ≤ 2         | 1   | R/Q ≤ 2        | 1   |
| V6      | R/S ≤ 2         |     | R/S ≤ 15      |     | R/S ≤ 15        |     | R/S ≤ 2         |     | R/S ≤ 2        |     |
|         | R ≤ 0.6 mV      |     | R ≤ 0.6 mV    |     | R ≤ 0.6 mV      |     | R ≤ 0.6 mV      |     | R ≤ 0.6 mV     |     |
|         | NtchInit40      |     | NtchInit40    |     | NtchInit40      |     | NtchInit40      |     | NtchInit40     |     |
| V6      | Q ≥ 30 ms       | 1   | Q ≥ 30 ms     | 1   | Q ≥ 30 ms       | 1   | Q ≥ 30 ms       | 1   | Q ≥ 30 ms      | 1   |
|         | R/Q ≤ 1         | 2   | R/Q ≤ 1       | 2   | R/Q ≤ 1         | 2   | R/Q ≤ 1         | 2   | R/Q ≤ 1        | 2   |
|         | R/S ≤ 1         |     | R/S ≤ 1       |     | R/S ≤ 1         |     | R/S ≤ 1         |     | R/S ≤ 1        |     |
| Total   | R/Q ≤ 3         | 1   | R/Q ≤ 3       | 1   | R/Q ≤ 3         | 1   | R/Q ≤ 3         | 1   | R/Q ≤ 3        | 1   |
|         | R/S ≤ 3         |     | R/S ≤ 2       |     | R/S ≤ 2         |     | R/S ≤ 3         |     | R/S ≤ 3        |     |
|         | R ≤ 0.6 mV      |     | R ≤ 0.6 mV    |     | R ≤ 0.6 mV      |     | R ≤ 0.6 mV      |     | R ≤ 0.6 mV     |     |
| Total   | NtchInit40      |     | NtchInit40    |     | NtchInit40      |     | NtchInit40      |     | NtchInit40     |     |
|         | Points          | 7   | Points        |     | Points          |     | Points          |     | Points         |     |

| Lead    | LBBB       |            |
|---------|------------|------------|
|         | Criteria   | Pts        |
| I       | any Q      | 1          |
|         | R/Q ≤ 1    | 2          |
|         | R/S ≤ 1    |            |
| II      | R/Q ≤ 15   | 1          |
|         | R/S ≤ 15   |            |
|         | Q ≥ 40 ms  | 2          |
| aVL     | Q ≥ 30 ms  | 1          |
|         | R/Q ≤ 0.5  | 1          |
|         | R/S ≤ 0.5  |            |
| aVF     | Q ≥ 50 ms  | 2          |
|         | Q ≥ 40 ms  | 1          |
|         | R/Q ≤ 0.5  | 1          |
| V1      | R/S ≤ 0.5  | 2          |
|         | R/Q ≤ 0.5  |            |
|         | R/S ≤ 1    | 1          |
| aVF     | R/S ≤ 1    | 1          |
|         | Q ≥ 50 ms  | 2          |
|         | Q ≥ 40 ms  | 1          |
| V1      | R/Q ≤ 0.5  | 1          |
|         | R/S ≤ 0.5  |            |
|         | NchInit40  | 1          |
| Ant.*** | R ≥ 0.3 mV | 2          |
|         | R ≥ 30 ms  |            |
|         | R ≥ 0.2 mV | 1          |
| V1      | R ≥ 20 ms  |            |
|         | S/S' ≥ 2.0 | 3          |
|         | S/S' ≥ 15  | 2          |
| Post    | S/S' ≥ 125 | 1          |
|         | NchInit40  | 1          |
|         | Ant.***    | R ≥ 0.4 mV |
| V2      | R ≥ 30 ms  |            |
|         | R ≥ 0.3 mV | 1          |
|         | R ≥ 20 ms  |            |
| Post    | S/S' ≥ 2.5 | 3          |
|         | S/S' ≥ 2.0 | 2          |
|         | S/S' ≥ 15  | 1          |
| V5      | any Q      | 1          |
|         | R/R' ≥ 2   | 2          |
|         | R/R' ≥ 1   | 1          |
| V6      | R/S ≤ 2    |            |
|         | R ≤ 0.5 mV |            |
|         | R/R' ≥ 2   | 2          |
| Total   | R/R' ≥ 1   | 1          |
|         | R/S ≤ 2    |            |
|         | Points     |            |

%LV infarct       
(3 #pts)

%LV infarct 21 (3 x #pts)    %LV infarct      (3 x #pts)

\* (for LVH) if ≥4 other points in leads I, aVL, V4, V5 or V6 then count QS in V1+V3  
 \*\* (RAO) if P positive amp in V1≥0.1mV or aVF P ≥0.175 mV, then exclude V1-V2 Post criteria  
 \*\*\* (RAO) if P positive amp in V1 ≥0.1mV or aVF P ≥0.175 mV, then exclude V1-V2 R-criteria points



|                         |         |                               |       |                              |                |
|-------------------------|---------|-------------------------------|-------|------------------------------|----------------|
| <b>Patient ID:</b>      | 17      | <b>QRS Duration:</b>          | 171ms | <b>Amplitude Adjustment:</b> | -13%           |
| <b>Age &amp; Sex:</b>   | 68 Male | <b>QRS Axis:</b>              | -40°  | <b>Duration Adjustment:</b>  | 0%             |
| <b>Conduction Type:</b> | LBBB    | <b>Right Atrial Overload:</b> | No    | <b>Total Points:</b>         | 7 points (21%) |

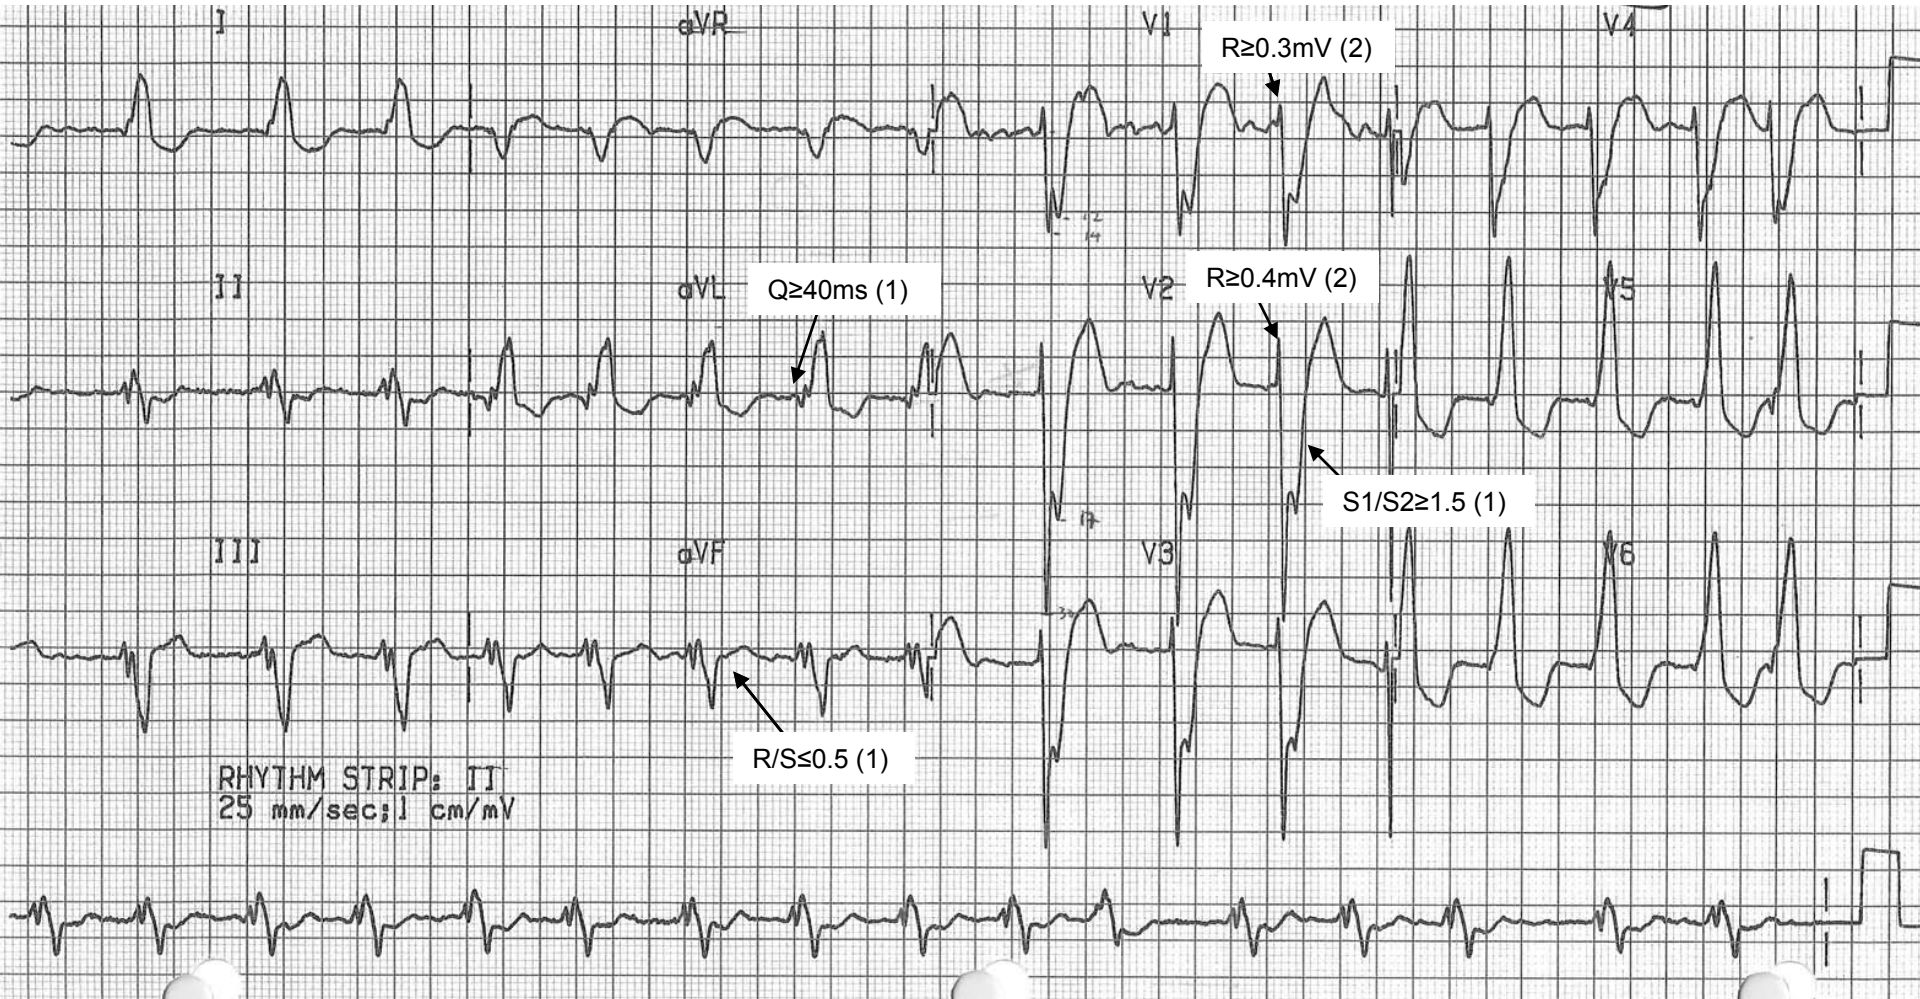

QRS Scoring

Patient ID 17

QRS duration 171ms

Amplitude adjust -13%  
(↑1%/yr age 20-54; ↓1%/yr >55 yrs; ↓ 10% for females)

Age & gender 68 Male

QRS axis -40°

Duration adjust 0% RAO(\*\*, \*\*\*)Yes/No  
(↓ 10% for females)

|         | RBBB            |     | LAFB          |     | LAFB + RBBB     |     | LVH             |     | No Confounders |     |
|---------|-----------------|-----|---------------|-----|-----------------|-----|-----------------|-----|----------------|-----|
| Lead    | Criteria        | Pts | Criteria      | Pts | Criteria        | Pts | Criteria        | Pts | Criteria       | Pts |
| I       | Q ≥ 30 ms       | 1   | Q ≥ 30 ms     | 1   | Q ≥ 30 ms       | 1   | Q ≥ 30 ms       | 1   | Q ≥ 30 ms      | 1   |
|         | R/Q ≤ 1         | 1   | R/Q ≤ 1       | 1   | R/Q ≤ 1         | 1   | R/Q ≤ 1         | 1   | R/Q ≤ 1        | 1   |
|         | R ≤ 0.2 mV      |     | R ≤ 0.2 mV    |     | R ≤ 0.2 mV      |     | R ≤ 0.2 mV      |     | R ≤ 0.2 mV     |     |
| II      | Q ≥ 40 ms       | 2   | Q ≥ 40 ms     | 2   | Q ≥ 40 ms       | 2   | Q ≥ 40 ms       | 2   | Q ≥ 40 ms      | 2   |
|         | Q ≥ 30 ms       | 1   | Q ≥ 30 ms     | 1   | Q ≥ 30 ms       | 1   | Q ≥ 30 ms       | 1   | Q ≥ 30 ms      | 1   |
|         | Q ≥ 30 ms       | 1   | Q ≥ 40 ms     | 1   | Q ≥ 40 ms       | 1   | Q ≥ 40 ms       | 1   | Q ≥ 30 ms      | 1   |
| aVL     | Q ≥ 30 ms       | 1   | Q ≥ 40 ms     | 1   | Q ≥ 40 ms       | 1   | Q ≥ 40 ms       | 1   | Q ≥ 30 ms      | 1   |
|         | R/Q ≤ 1         | 1   | R/Q ≤ 1       | 1   | R/Q ≤ 1         | 1   | R/Q ≤ 1         | 1   | R/Q ≤ 1        | 1   |
|         | Q ≥ 50 ms       | 3   | Q ≥ 50 ms     | 3   | Q ≥ 50 ms       | 3   | Q ≥ 60 ms       | 3   | Q ≥ 50 ms      | 3   |
| aVF     | Q ≥ 40 ms       | 2   | Q ≥ 40 ms     | 2   | Q ≥ 40 ms       | 2   | Q ≥ 50 ms       | 2   | Q ≥ 40 ms      | 2   |
|         | Q ≥ 30 ms       | 1   | Q ≥ 30 ms     | 1   | Q ≥ 30 ms       | 1   | Q ≥ 40 ms       | 1   | Q ≥ 30 ms      | 1   |
|         | R/Q ≤ 1         | 2   | R/Q ≤ 1       | 2   | R/Q ≤ 1         | 2   | R/Q ≤ 1         | 2   | R/Q ≤ 1        | 2   |
| V1      | R/Q ≤ 2         | 1   | R/Q ≤ 2       | 1   | R/Q ≤ 2         | 1   | R/Q ≤ 2         | 1   | R/Q ≤ 2        | 1   |
|         | Q ≥ 50 ms       | 2   | Q ≥ 50 ms     | 2   | Q ≥ 50 ms       | 2   | any QR          | 1   | any QR         | 1   |
|         | any Q           | 1   | any QR        | 1   | any Q           | 1   | (or any Q if *) | 1   | any Q          | 1   |
| Ant.    | Init R ≤ 20 ms  |     |               |     |                 |     | NtchInit40      |     |                |     |
|         | R/S ≥ 1         | 1   | R/S ≥ 1       | 1   | R/S ≥ 1         | 1   | R/S ≥ 1         | 1   | R/S ≥ 1        | 1   |
|         | Init R ≥ 60 ms  | 2   | R ≥ 50 ms     | 2   | Init R ≥ 60 ms  | 2   | R ≥ 50 ms       | 2   | R ≥ 50 ms      | 2   |
| Post.*  | Init R ≥ 15 mV  |     | R ≥ 1mV       |     | Init R ≥ 15 mV  |     | R ≥ 1mV         |     | R ≥ 1mV        |     |
|         | Init R ≥ 50 ms  | 1   | R ≥ 40 ms     | 1   | Init R ≥ 50 ms  | 1   | R ≥ 40 ms       | 1   | R ≥ 40 ms      | 1   |
|         | Init R ≥ 10 mV  |     | R ≥ 0.7 mV    |     | Init R ≥ 10 mV  |     | R ≥ 0.7 mV      |     | R ≥ 0.7 mV     |     |
| V2      | Q ≥ 50 ms       | 2   | Qs0.2&Ss0.2mV | 1   | Q ≥ 50 ms       | 2   | Qs0.2&Ss0.2 mV  | 1   | Qs0.2&Ss0.2mV  | 1   |
|         | any Q           | 1   | any QR        | 1   | any Q           | 1   | any QR          | 1   | any Q          | 1   |
|         | R ≤ 10 ms       |     | R ≤ 0.1mV     |     | R ≤ 10 ms       |     | (or any Q if *) |     | R ≤ 10 ms      |     |
| V2      | R ≤ 0.1mV       |     | R ≤ 0.1mV     |     | R ≤ 0.1mV       |     | NtchInit40      |     | R ≤ 0.1mV      |     |
|         | R/S ≥ 15        | 1   | R/S ≥ 15      | 1   | R/S ≥ 15        | 1   | R/S ≥ 15        | 1   | R/S ≥ 15       | 1   |
|         | Init R ≥ 70 ms  | 2   | R ≥ 60 ms     | 2   | Init R ≥ 70 ms  | 2   | R ≥ 60 ms       | 2   | R ≥ 60 ms      | 2   |
| Post.** | Init R ≥ 2.5 mV |     | R ≥ 2 mV      |     | Init R ≥ 2.5 mV |     | R ≥ 2 mV        |     | R ≥ 2 mV       |     |
|         | Init R ≥ 50 ms  | 1   | R ≥ 50 ms     | 1   | Init R ≥ 50 ms  | 1   | R ≥ 50 ms       | 1   | R ≥ 50 ms      | 1   |
|         | Init R ≥ 2.0 mV |     | R ≥ 15 mV     |     | Init R ≥ 2.0 mV |     | R ≥ 15 mV       |     | R ≥ 15 mV      |     |
| V3      | Q ≥ 30 ms       | 2   | Q ≥ 30 ms     | 2   | Q ≥ 30 ms       | 2   | QR&(Q ≥ 30 ms)  | 2   | Q ≥ 30 ms      | 2   |
|         | R ≤ 10 ms       |     | R ≤ 10 ms     |     | R ≤ 10 ms       |     | NtchInit40      |     | R ≤ 10 ms      |     |
|         | Q ≥ 20 ms       | 1   | Q ≥ 20 ms     | 1   | Q ≥ 20 ms       | 1   | any QR          | 1   | Q ≥ 20 ms      | 1   |
| V4      | R ≤ 20 ms       |     | R ≤ 20 ms     |     | R ≤ 20 ms       |     | (or any Q if *) |     | R ≤ 20 ms      |     |
|         | Q ≥ 20 ms       | 1   | Q ≥ 20 ms     | 1   | Q ≥ 20 ms       | 1   | Q ≥ 20 ms       | 1   | Q ≥ 20 ms      | 1   |
|         | R/Q ≤ 0.5       | 2   | R/Q ≤ 0.5     | 2   | R/Q ≤ 0.5       | 2   | R/Q ≤ 0.5       | 2   | R/Q ≤ 0.5      | 2   |
| V5      | R/S ≤ 0.5       |     | R/S ≤ 0.5     |     | R/S ≤ 0.5       |     | R/S ≤ 0.5       |     | R/S ≤ 0.5      |     |
|         | R/Q ≤ 1         | 1   | R/Q ≤ 1       | 1   | R/Q ≤ 1         | 1   | R/Q ≤ 1         | 1   | R/Q ≤ 1        | 1   |
|         | R/S ≤ 1         |     | R/S ≤ 1       |     | R/S ≤ 1         |     | R/S ≤ 1         |     | R/S ≤ 1        |     |
| V6      | R ≤ 0.5 mV      |     | R ≤ 0.5 mV    |     | R ≤ 0.5 mV      |     | R ≤ 0.5 mV      |     | R ≤ 0.5 mV     |     |
|         | NtchInit40      |     | NtchInit40    |     | NtchInit40      |     | NtchInit40      |     | NtchInit40     |     |
|         | Q ≥ 30 ms       | 1   | Q ≥ 30 ms     | 1   | Q ≥ 30 ms       | 1   | Q ≥ 30 ms       | 1   | Q ≥ 30 ms      | 1   |
| V5      | R/Q ≤ 1         | 2   | R/Q ≤ 1       | 2   | R/Q ≤ 1         | 2   | R/Q ≤ 1         | 2   | R/Q ≤ 1        | 2   |
|         | R/S ≤ 1         |     | R/S ≤ 1       |     | R/S ≤ 1         |     | R/S ≤ 1         |     | R/S ≤ 1        |     |
|         | R/Q ≤ 2         | 1   | R/Q ≤ 2       | 1   | R/Q ≤ 2         | 1   | R/Q ≤ 2         | 1   | R/Q ≤ 2        | 1   |
| V6      | R/S ≤ 2         |     | R/S ≤ 15      |     | R/S ≤ 2         |     | R/S ≤ 2         |     | R/S ≤ 2        |     |
|         | R ≤ 0.6 mV      |     | R ≤ 0.6 mV    |     | R ≤ 0.6 mV      |     | R ≤ 0.6 mV      |     | R ≤ 0.6 mV     |     |
|         | NtchInit40      |     | NtchInit40    |     | NtchInit40      |     | NtchInit40      |     | NtchInit40     |     |
| V6      | Q ≥ 30 ms       | 1   | Q ≥ 30 ms     | 1   | Q ≥ 30 ms       | 1   | Q ≥ 30 ms       | 1   | Q ≥ 30 ms      | 1   |
|         | R/Q ≤ 1         | 2   | R/Q ≤ 1       | 2   | R/Q ≤ 1         | 2   | R/Q ≤ 1         | 2   | R/Q ≤ 1        | 2   |
|         | R/S ≤ 1         |     | R/S ≤ 1       |     | R/S ≤ 1         |     | R/S ≤ 1         |     | R/S ≤ 1        |     |
| V6      | R/Q ≤ 3         | 1   | R/Q ≤ 3       | 1   | R/Q ≤ 3         | 1   | R/Q ≤ 3         | 1   | R/Q ≤ 3        | 1   |
|         | R/S ≤ 3         |     | R/S ≤ 2       |     | R/S ≤ 3         |     | R/S ≤ 3         |     | R/S ≤ 3        |     |
|         | R ≤ 0.6 mV      |     | R ≤ 0.6 mV    |     | R ≤ 0.6 mV      |     | R ≤ 0.6 mV      |     | R ≤ 0.6 mV     |     |
| Total   | NtchInit40      |     | NtchInit40    |     | NtchInit40      |     | NtchInit40      |     | NtchInit40     |     |
|         | Points          |     | Points        |     | Points          |     | Points          |     | Points         |     |
|         | Points          |     | Points        |     | Points          |     | Points          |     | Points         |     |

| LBBB   |            |     |
|--------|------------|-----|
| Lead   | Criteria   | Pts |
| I      | any Q      | 1   |
|        | R/Q ≤ 1    | 2   |
|        | R/S ≤ 1    |     |
| II     | R/Q ≤ 15   | 1   |
|        | R/S ≤ 15   |     |
|        | Q ≥ 40 ms  | 2   |
| aVL    | Q ≥ 30 ms  | 1   |
|        | Q ≥ 30 ms  | 1   |
|        | R/Q ≤ 0.5  | 1   |
| aVF    | R/S ≤ 0.5  | 1   |
|        | R/S ≤ 0.5  | 1   |
|        | Q ≥ 50 ms  | 2   |
| V1     | Q ≥ 40 ms  | 1   |
|        | R/S ≤ 0.5  | 2   |
|        | R/Q ≤ 0.5  | 1   |
| Ant.*  | R/S ≤ 1    | 1   |
|        | R/Q ≤ 1    | 1   |
|        | Q ≥ 50 ms  | 2   |
| aVF    | Q ≥ 50 ms  | 2   |
|        | Q ≥ 40 ms  | 1   |
|        | R/Q ≤ 0.5  | 1   |
| V1     | R/S ≤ 0.5  | 1   |
|        | NtchInit40 | 1   |
|        | R ≥ 0.3 mV | 2   |
| Ant.** | R ≥ 30 ms  |     |
|        | R ≥ 0.2 mV | 1   |
|        | R ≥ 20 ms  |     |
| V1     | S/S' ≥ 2.0 | 3   |
|        | S/S' ≥ 1.5 | 2   |
|        | S/S' ≥ 125 | 1   |
| V2     | NtchInit40 | 1   |
|        | R ≥ 0.4 mV | 2   |
|        | R ≥ 30 ms  |     |
| Ant.** | R ≥ 0.3 mV | 1   |
|        | R ≥ 20 ms  |     |
|        | S/S' ≥ 2.5 | 3   |
| V2     | S/S' ≥ 2.0 | 2   |
|        | S/S' ≥ 1.5 | 1   |
|        | any Q      | 1   |
| V5     | R/R' ≥ 2   | 2   |
|        | R/R' ≥ 1   | 1   |
|        | R/S ≤ 2    |     |
| V6     | R ≤ 0.5 mV | 1   |
|        | R/R' ≥ 2   | 2   |
|        | R/R' ≥ 1   | 1   |
| V6     | R/S ≤ 2    | 1   |
|        | R ≤ 0.6 mV | 1   |
|        | R ≤ 0.6 mV | 1   |
| Total  | Points     | 7   |

%LV infarct 21  
(3 x #pts)

%LV infarct (3 x #pts) \_\_\_\_\_ %LV infarct (3 x #pts) \_\_\_\_\_

\*(for LVH) if ≥4 other points in leads I, aVL, V4, V5 or V6 then count QS in V1+V3  
 \*\* (RAO) if P positive amp in V1≥0.1mV or aVF P ≥0.175 mV, then exclude V1-V2 Post criteria  
 \*\*\* (RAO) if P positive amp in V1 ≥0.1mV or aVF P ≥0.175 mV, then exclude V1-V2 R-criteria points



QRS Scoring

Patient ID 18 QRS duration 112ms Amplitude adjust -17%  
 (↑1%/yr age 20-54; ↓1%/yr >55 yrs; ↓ 10% for females)

Age & gender 72 Male QRS axis -73° Duration adjust 0% RAO(\*\*, \*\*\*)Yes/No (No)  
 (↓ 10% for females)

| Lead         | RBBB            |     | LAFB          |          | LAFB + RBBB     |     | LVH              |     | No Confounders |     |
|--------------|-----------------|-----|---------------|----------|-----------------|-----|------------------|-----|----------------|-----|
|              | Criteria        | Pts | Criteria      | Pts      | Criteria        | Pts | Criteria         | Pts | Criteria       | Pts |
| I            | Q ≥ 30 ms       | 1   | Q ≥ 30 ms     | 1        | Q ≥ 30 ms       | 1   | Q ≥ 30 ms        | 1   | Q ≥ 30 ms      | 1   |
|              | R/Q ≤ 1         | 1   | R/Q ≤ 1       | 1        | R/Q ≤ 1         | 1   | R/Q ≤ 1          | 1   | R/Q ≤ 1        | 1   |
|              | R ≤ 0.2 mV      |     | R ≤ 0.2 mV    |          | R ≤ 0.2 mV      |     | R ≤ 0.2 mV       |     | R ≤ 0.2 mV     |     |
| II           | Q ≥ 40 ms       | 2   | Q ≥ 40 ms     | 2        | Q ≥ 40 ms       | 2   | Q ≥ 40 ms        | 2   | Q ≥ 40 ms      | 2   |
|              | Q ≥ 30 ms       | 1   | Q ≥ 30 ms     | 1        | Q ≥ 30 ms       | 1   | Q ≥ 30 ms        | 1   | Q ≥ 30 ms      | 1   |
|              | Q ≥ 30 ms       | 1   | Q ≥ 40 ms     | 1        | Q ≥ 40 ms       | 1   | Q ≥ 40 ms        | 1   | Q ≥ 30 ms      | 1   |
| aVL          | Q ≥ 30 ms       | 1   | Q ≥ 40 ms     | 1        | Q ≥ 40 ms       | 1   | Q ≥ 40 ms        | 1   | Q ≥ 30 ms      | 1   |
|              | R/Q ≤ 1         | 1   | R/Q ≤ 1       | 1        | R/Q ≤ 1         | 1   | R/Q ≤ 1          | 1   | R/Q ≤ 1        | 1   |
|              | Q ≥ 50 ms       | 3   | Q ≥ 50 ms     | 3        | Q ≥ 50 ms       | 3   | Q ≥ 60 ms        | 3   | Q ≥ 50 ms      | 3   |
| aVF          | Q ≥ 40 ms       | 2   | Q ≥ 40 ms     | 2        | Q ≥ 40 ms       | 2   | Q ≥ 50 ms        | 2   | Q ≥ 40 ms      | 2   |
|              | Q ≥ 30 ms       | 1   | Q ≥ 30 ms     | 1        | Q ≥ 30 ms       | 1   | Q ≥ 40 ms        | 1   | Q ≥ 30 ms      | 1   |
|              | R/Q ≤ 1         | 2   | R/Q ≤ 1       | 2        | R/Q ≤ 1         | 2   | R/Q ≤ 1          | 2   | R/Q ≤ 1        | 2   |
| V1           | Q ≥ 50 ms       | 2   | Q ≥ 50 ms     | 2        | Q ≥ 50 ms       | 2   | any QR           | 2   | any QR         | 2   |
|              | any Q           | 1   | any QR        | 1        | any Q           | 1   | (or any Q if *)  | 1   | any Q          | 1   |
|              | Init R ≤ 2.0 mV |     |               |          |                 |     | NtchInit40       |     |                |     |
| Post.**      | Init R ≥ 60 ms  | 2   | R ≥ 50 ms     | 2        | Init R ≥ 60 ms  | 2   | R ≥ 50 ms        | 2   | R ≥ 50 ms      | 2   |
|              | Init R ≥ 15 mV  |     | R ≥ 1mV       |          | Init R ≥ 15 mV  |     | R ≥ 1mV          |     | R ≥ 1mV        |     |
|              | Init R ≥ 50 ms  | 1   | R ≥ 40 ms     | 1        | Init R ≥ 50 ms  | 1   | R ≥ 40 ms        | 1   | R ≥ 40 ms      | 1   |
| V2           | Q ≥ 50 ms       | 2   | any QR        | 1        | Q ≥ 50 ms       | 2   | any QR           | 1   | any Q          | 1   |
|              | any Q           | 1   | R ≤ 10 ms     | 1        | any Q           | 1   | (or any Q if *)  | 1   | R ≤ 10 ms      | 1   |
|              | R ≤ 0.1 mV      |     | R ≤ 0.1 mV    |          | R ≤ 0.1 mV      |     | NtchInit40       |     | R ≤ 0.1 mV     |     |
| Post.**      | Init R ≥ 70 ms  | 2   | R ≥ 60 ms     | 2        | Init R ≥ 70 ms  | 2   | R ≥ 60 ms        | 2   | R ≥ 60 ms      | 2   |
|              | Init R ≥ 2.5 mV |     | R ≥ 2 mV      |          | Init R ≥ 2.5 mV |     | R ≥ 2 mV         |     | R ≥ 2 mV       |     |
|              | Init R ≥ 50 ms  | 1   | R ≥ 50 ms     | 1        | Init R ≥ 50 ms  | 1   | R ≥ 50 ms        | 1   | R ≥ 50 ms      | 1   |
| V3           | Q ≥ 30 ms       | 2   | Q ≥ 30 ms     | 2        | Q ≥ 30 ms       | 2   | QR & (Q ≥ 30 ms) | 2   | Q ≥ 30 ms      | 2   |
|              | R ≤ 10 ms       | 1   | R ≤ 10 ms     | 1        | R ≤ 10 ms       | 1   | NtchInit40       | 1   | R ≤ 10 ms      | 1   |
|              | Q ≥ 20 ms       | 1   | Q ≥ 20 ms     | 1        | Q ≥ 20 ms       | 1   | any QR           | 1   | Q ≥ 20 ms      | 1   |
| V4           | Q ≥ 20 ms       | 1   | Q ≥ 20 ms     | 1        | Q ≥ 20 ms       | 1   | Q ≥ 20 ms        | 1   | Q ≥ 20 ms      | 1   |
|              | R/Q ≤ 0.5       | 2   | R/Q ≤ 0.5     | 2        | R/Q ≤ 0.5       | 2   | R/Q ≤ 0.5        | 2   | R/Q ≤ 0.5      | 2   |
|              | R/S ≤ 0.5       | 1   | R/S ≤ 0.5     | 1        | R/S ≤ 0.5       | 1   | R/S ≤ 0.5        | 1   | R/S ≤ 0.5      | 1   |
| V5           | Q ≥ 30 ms       | 1   | Q ≥ 30 ms     | 1        | Q ≥ 30 ms       | 1   | Q ≥ 30 ms        | 1   | Q ≥ 30 ms      | 1   |
|              | R/Q ≤ 1         | 2   | R/Q ≤ 1       | 2        | R/Q ≤ 1         | 2   | R/Q ≤ 1          | 2   | R/Q ≤ 1        | 2   |
|              | R/S ≤ 1         | 1   | R/S ≤ 1       | 1        | R/S ≤ 1         | 1   | R/S ≤ 1          | 1   | R/S ≤ 1        | 1   |
| V6           | Q ≥ 30 ms       | 1   | Q ≥ 30 ms     | 1        | Q ≥ 30 ms       | 1   | Q ≥ 30 ms        | 1   | Q ≥ 30 ms      | 1   |
|              | R/Q ≤ 1         | 2   | R/Q ≤ 1       | 2        | R/Q ≤ 1         | 2   | R/Q ≤ 1          | 2   | R/Q ≤ 1        | 2   |
|              | R/S ≤ 1         | 1   | R/S ≤ 1       | 1        | R/S ≤ 1         | 1   | R/S ≤ 1          | 1   | R/S ≤ 1        | 1   |
| <b>Total</b> | <b>Points</b>   |     | <b>Points</b> | <b>8</b> | <b>Points</b>   |     | <b>Points</b>    |     | <b>Points</b>  |     |

| Lead         | Criteria      | Pts |
|--------------|---------------|-----|
| I            | any Q         | 1   |
|              | R/Q ≤ 1       | 2   |
|              | R/S ≤ 1       | 1   |
| II           | Q ≥ 40 ms     | 2   |
|              | Q ≥ 30 ms     | 1   |
|              | R/Q ≤ 0.5     | 1   |
| aVL          | Q ≥ 50 ms     | 2   |
|              | Q ≥ 40 ms     | 1   |
|              | R/S ≤ 0.5     | 2   |
| aVF          | Q ≥ 50 ms     | 2   |
|              | Q ≥ 40 ms     | 1   |
|              | R/Q ≤ 0.5     | 1   |
| V1           | NchInit40     | 1   |
|              | R ≥ 0.3 mV    | 2   |
|              | R ≥ 30 ms     | 1   |
| V2           | S/S' ≥ 2.0    | 3   |
|              | S/S' ≥ 1.5    | 2   |
|              | S/S' ≥ 1.25   | 1   |
| V3           | NchInit40     | 1   |
|              | R ≥ 0.4 mV    | 2   |
|              | R ≥ 30 ms     | 1   |
| V4           | S/S' ≥ 2.5    | 3   |
|              | S/S' ≥ 2.0    | 2   |
|              | S/S' ≥ 1.5    | 1   |
| V5           | any Q         | 1   |
|              | R/R' ≥ 2      | 2   |
|              | R/R' ≥ 1      | 1   |
| V6           | Q ≥ 20 ms     | 1   |
|              | R/R' ≥ 2      | 2   |
|              | R/R' ≥ 1      | 1   |
| <b>Total</b> | <b>Points</b> |     |

%LV infarct       
 (3 \* #pts)

%LV infarct      %LV infarct 24 %LV infarct      %LV infarct      %LV infarct       
 (3 x #pts) (3 x #pts) (3 x #pts) (3 x #pts) (3 x #pts)

\* (for LVH) if ≥4 other points in leads I, aVL, V4, V5 or V6 then count QS in V1+V3  
 \*\* (RAO) if P positive amp in V1 ≥ 0.1mV or aVF P ≥ 0.175 mV, then exclude V1-V2 R-criteria points  
 \*\*\* (RAO) if P positive amp in V1 ≥ 0.1mV or aVF P ≥ 0.175 mV, then exclude V1-V2 R-criteria points

|                         |         |                               |       |                              |               |
|-------------------------|---------|-------------------------------|-------|------------------------------|---------------|
| <b>Patient ID:</b>      | 19      | <b>QRS Duration:</b>          | 134ms | <b>Amplitude Adjustment:</b> | -9%           |
| <b>Age &amp; Sex:</b>   | 64 Male | <b>QRS Axis:</b>              | +115° | <b>Duration Adjustment:</b>  | 0%            |
| <b>Conduction Type:</b> | RBBB    | <b>Right Atrial Overload:</b> | No    | <b>Total Points</b>          | 2 points (6%) |

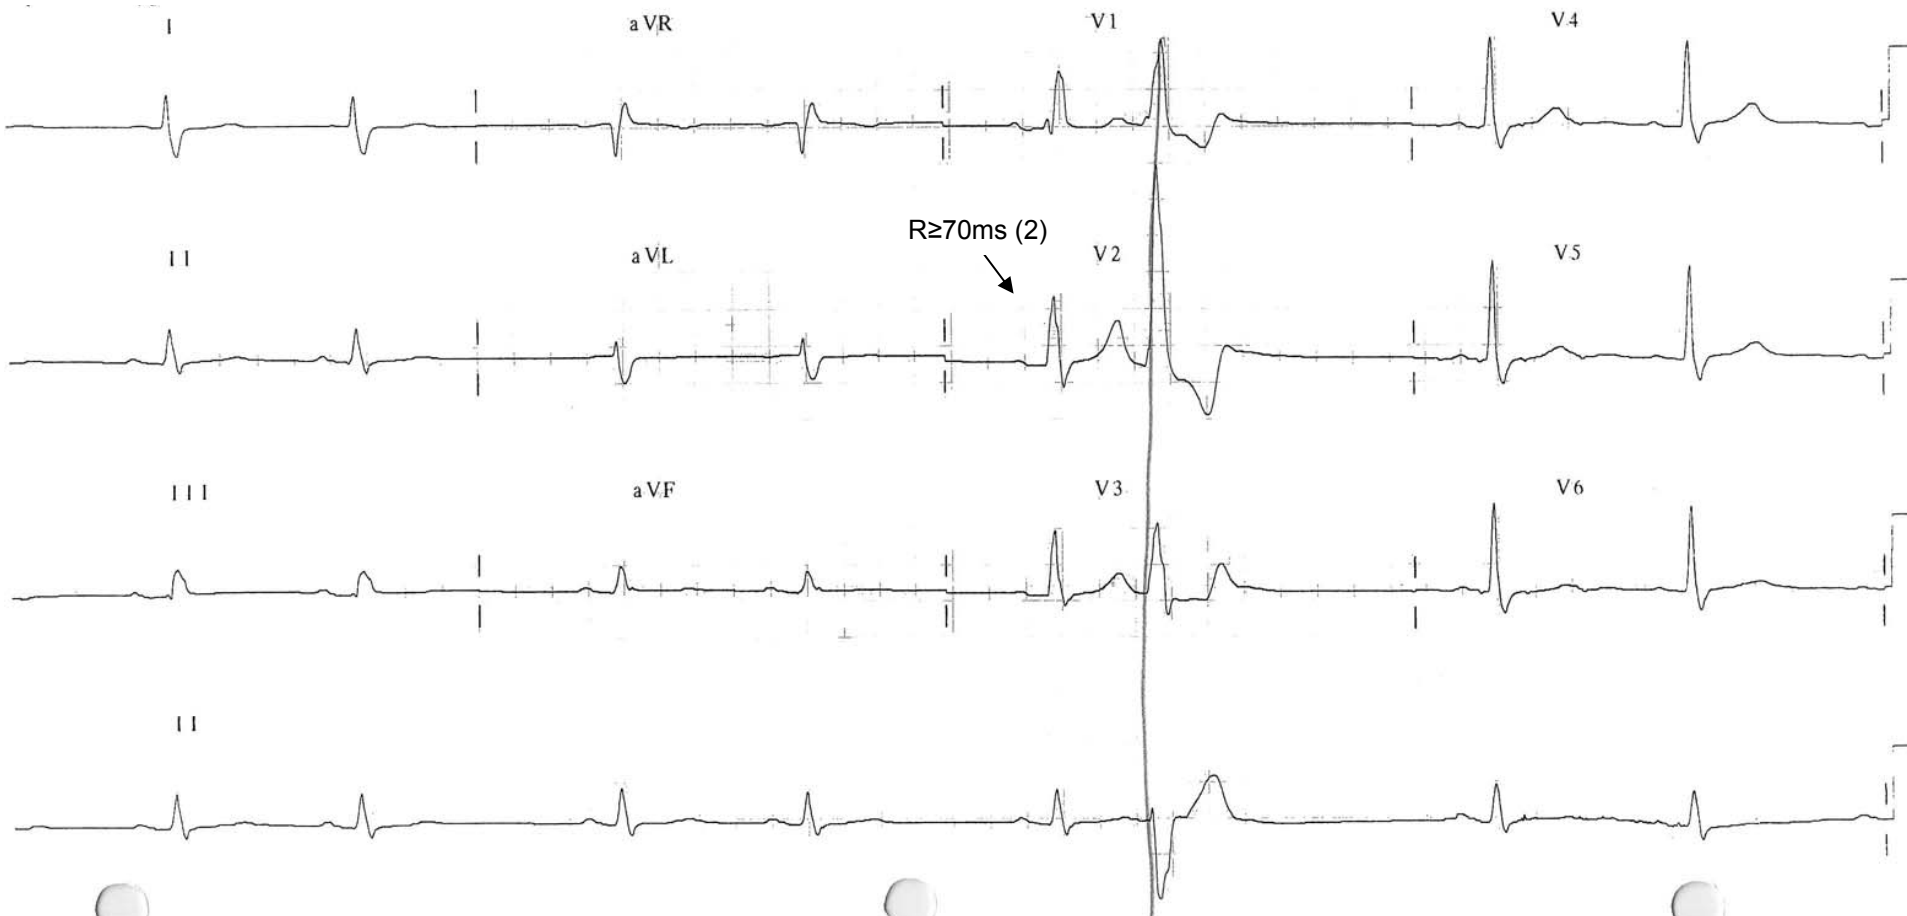

QRS Scoring

Patient ID 19

QRS duration 134ms

Amplitude adjust -9%

(↑1%/yr age 20-54; ↓1%/yr >55 yrs; ↓ 10% for females)

Age & gender 64 Male

QRS axis +115°

Duration adjust 0% RAO(\*\*, \*\*\*) Yes **(No)**

(↓ 10% for females)

| Lead   | RBBB                   |     | LAFB                   |     | LAFB + RBBB            |     | LVH                    |     | No Confounders         |     |
|--------|------------------------|-----|------------------------|-----|------------------------|-----|------------------------|-----|------------------------|-----|
|        | Criteria               | Pts |
| I      | Q ≥ 30 ms              | 1   |
|        | R/Q ≤ 1                | 1   |
|        | R ≤ 0.2 mV             |     | R ≤ 0.2 mV             |     | R ≤ 0.2 mV             |     | R ≤ 0.2 mV             |     | R ≤ 0.2 mV             |     |
| II     | Q ≥ 40 ms              | 2   |
|        | Q ≥ 30 ms              | 1   |
|        | Q ≥ 30 ms              | 1   | Q ≥ 40 ms              | 1   | Q ≥ 40 ms              | 1   | Q ≥ 40 ms              | 1   | Q ≥ 30 ms              | 1   |
| aVL    | Q ≥ 30 ms              | 1   | Q ≥ 40 ms              | 1   | Q ≥ 40 ms              | 1   | Q ≥ 40 ms              | 1   | Q ≥ 30 ms              | 1   |
|        | R/Q ≤ 1                | 1   |
|        | Q ≥ 50 ms              | 3   | Q ≥ 50 ms              | 3   | Q ≥ 50 ms              | 3   | Q ≥ 60 ms              | 3   | Q ≥ 50 ms              | 3   |
| aVF    | Q ≥ 40 ms              | 2   | Q ≥ 40 ms              | 2   | Q ≥ 40 ms              | 2   | Q ≥ 50 ms              | 2   | Q ≥ 40 ms              | 2   |
|        | Q ≥ 30 ms              | 1   | Q ≥ 30 ms              | 1   | Q ≥ 30 ms              | 1   | Q ≥ 40 ms              | 1   | Q ≥ 30 ms              | 1   |
|        | R/Q ≤ 1                | 2   |
| V1     | R/Q ≤ 2                | 1   |
|        | Q ≥ 50 ms              | 2   | Q ≥ 50 ms              | 2   | Q ≥ 50 ms              | 2   | any QR                 | 2   | any QR                 | 2   |
|        | any Q                  | 1   | any QR                 | 1   | any Q                  | 1   | (or any Q if *)        | 1   | any Q                  | 1   |
| Ant.   | Init R ≤ 20 ms         |     |                        |     |                        |     | NtchInit40             |     |                        |     |
|        | R/S ≥ 1                | 1   |
|        | Init R ≥ 60 ms         | 2   | R ≥ 50 ms              | 2   | Init R ≥ 60 ms         | 2   | R ≥ 50 ms              | 2   | R ≥ 50 ms              | 2   |
| Post.* | Init R ≥ 15 mV         |     | R ≥ 1mV                |     | Init R ≥ 15 mV         |     | R ≥ 1mV                |     | R ≥ 1mV                |     |
|        | Init R ≥ 50 ms         | 1   | R ≥ 40 ms              | 1   | Init R ≥ 50 ms         | 1   | R ≥ 40 ms              | 1   | R ≥ 40 ms              | 1   |
|        | Init R ≥ 10 mV         |     | R ≥ 0.7 mV             |     | Init R ≥ 10 mV         |     | R ≥ 0.7 mV             |     | R ≥ 0.7 mV             |     |
| V2     | Q ≥ 50 ms              | 2   | Qs0.2&Ss0.2mV          | 1   | Q ≥ 50 ms              | 2   | Qs0.2&Ss0.2 mV         | 1   | Qs0.2&Ss0.2mV          | 1   |
|        | any Q                  | 1   | any QR                 | 1   | any Q                  | 1   | any QR                 | 1   | any Q                  | 1   |
|        | R ≤ 10 ms              |     | R ≤ 0.1mV              |     | R ≤ 10 ms              |     | (or any Q if *)        |     | R ≤ 0.1mV              |     |
| V2     | R ≤ 0.1mV              |     | R/S ≥ 15               | 1   | R ≤ 0.1mV              |     | R/S ≥ 15               | 1   | R/S ≥ 15               | 1   |
|        | Init R ≥ 70 ms         | 2   | R ≥ 60 ms              | 2   | Init R ≥ 70 ms         | 2   | R ≥ 60 ms              | 2   | R ≥ 60 ms              | 2   |
|        | Init R ≥ 2.5 mV        |     | R ≥ 2 mV               |     | Init R ≥ 2.5 mV        |     | R ≥ 2 mV               |     | R ≥ 2 mV               |     |
| Post.  | Init R ≥ 50 ms         | 1   | R ≥ 50 ms              | 1   | Init R ≥ 50 ms         | 1   | R ≥ 50 ms              | 1   | R ≥ 50 ms              | 1   |
|        | Init R ≥ 2.0 mV        |     | R ≥ 15 mV              |     | Init R ≥ 2.0 mV        |     | R ≥ 15 mV              |     | R ≥ 15 mV              |     |
|        | Qs0.3&Ss0.3mV          | 1   |
| V3     | Q ≥ 30 ms              | 2   | Q ≥ 30 ms              | 2   | Q ≥ 30 ms              | 2   | QR&(Q ≥ 30 ms)         | 2   | Q ≥ 30 ms              | 2   |
|        | R ≤ 10 ms              |     | R ≤ 10 ms              |     | R ≤ 10 ms              |     | NtchInit40             |     | R ≤ 10 ms              |     |
|        | Q ≥ 20 ms              | 1   | Q ≥ 20 ms              | 1   | Q ≥ 20 ms              | 1   | any QR                 | 1   | Q ≥ 20 ms              | 1   |
| V4     | R ≤ 20 ms              |     | R ≤ 20 ms              |     | R ≤ 20 ms              |     | (or any Q if *)        |     | R ≤ 20 ms              |     |
|        | Q ≥ 20 ms              | 1   |
|        | R/Q ≤ 0.5              | 2   |
| V5     | R/S ≤ 0.5              |     |
|        | R/Q ≤ 1                | 1   |
|        | R/S ≤ 1                |     | R/S ≤ 1                |     | R/S ≤ 1                |     | R/S ≤ 1                |     | R/S ≤ 1                |     |
| V6     | R ≤ 0.5 mV             |     |
|        | NtchInit40             |     | NtchInit40             |     | NtchInit40             |     | NtchInit40             |     | NtchInit40             |     |
|        | Q ≥ 30 ms              | 1   |
| V5     | R/Q ≤ 1                | 2   |
|        | R/S ≤ 1                |     | R/S ≤ 1                |     | R/S ≤ 1                |     | R/S ≤ 1                |     | R/S ≤ 1                |     |
|        | R/Q ≤ 2                | 1   |
| V6     | R/S ≤ 2                |     | R/S ≤ 15               |     | R/S ≤ 2                |     | R/S ≤ 2                |     | R/S ≤ 2                |     |
|        | R ≤ 0.6 mV             |     | R ≤ 0.6 mV             |     | R ≤ 0.6 mV             |     | R ≤ 0.6 mV             |     | R ≤ 0.6 mV             |     |
|        | NtchInit40             |     | NtchInit40             |     | NtchInit40             |     | NtchInit40             |     | NtchInit40             |     |
| V6     | Q ≥ 30 ms              | 1   |
|        | R/Q ≤ 1                | 2   |
|        | R/S ≤ 1                |     | R/S ≤ 1                |     | R/S ≤ 1                |     | R/S ≤ 1                |     | R/S ≤ 1                |     |
| Total  | R/Q ≤ 3                | 1   |
|        | R/S ≤ 3                |     | R/S ≤ 2                |     | R/S ≤ 3                |     | R/S ≤ 3                |     | R/S ≤ 3                |     |
|        | R ≤ 0.6 mV             |     | R ≤ 0.6 mV             |     | R ≤ 0.6 mV             |     | R ≤ 0.6 mV             |     | R ≤ 0.6 mV             |     |
| Total  | NtchInit40             |     |
|        | Points                 | 2   | Points                 |     | Points                 |     | Points                 |     | Points                 |     |
|        | %LV infarct (3 x #pts) | 6   | %LV infarct (3 x #pts) |     |

| Lead    | LBBB       |     |
|---------|------------|-----|
|         | Criteria   | Pts |
| I       | any Q      | 1   |
|         | R/Q ≤ 1    | 2   |
|         | R/S ≤ 1    |     |
| II      | R/Q ≤ 15   | 1   |
|         | R/S ≤ 15   |     |
|         | Q ≥ 40 ms  | 2   |
| aVL     | Q ≥ 30 ms  | 1   |
|         | R/Q ≤ 0.5  | 1   |
|         | R/S ≤ 0.5  |     |
| aVF     | Q ≥ 50 ms  | 2   |
|         | Q ≥ 40 ms  | 1   |
|         | R/Q ≤ 0.5  | 1   |
| V1      | R/S ≤ 0.5  | 2   |
|         | R/Q ≤ 0.5  |     |
|         | R/S ≤ 1    | 1   |
| aVF     | R/Q ≤ 1    | 1   |
|         | Q ≥ 50 ms  | 2   |
|         | Q ≥ 40 ms  | 1   |
| V1      | R/S ≤ 0.5  | 2   |
|         | R/Q ≤ 0.5  |     |
|         | R/S ≤ 0.5  | 1   |
| Ant.*** | NtchInit40 | 1   |
|         | R ≥ 0.3 mV | 2   |
|         | R ≥ 30 ms  |     |
| V1      | R ≥ 0.2 mV | 1   |
|         | R ≥ 20 ms  |     |
|         | S/S' ≥ 2.0 | 3   |
| Post    | S/S' ≥ 15  | 2   |
|         | S/S' ≥ 125 | 1   |
|         | NtchInit40 | 1   |
| Ant.*** | R ≥ 0.4 mV | 2   |
|         | R ≥ 30 ms  |     |
|         | R ≥ 0.3 mV | 1   |
| V2      | R ≥ 20 ms  |     |
|         | S/S' ≥ 2.5 | 3   |
|         | S/S' ≥ 2.0 | 2   |
| Post    | S/S' ≥ 15  | 1   |
|         | any Q      | 1   |
|         | R/R' ≥ 2   | 2   |
| V5      | R/R' ≥ 1   | 1   |
|         | R/S ≤ 2    |     |
|         | R ≤ 0.5 mV | 1   |
| V6      | R/R' ≥ 2   | 2   |
|         | R/R' ≥ 1   | 1   |
|         | R/S ≤ 2    | 1   |
| Total   | Points     |     |

%LV infarct (3 #pts) \_\_\_\_\_

\* (for LVH) if ≥ 4 other points in leads I, aVL, V4, V5 or V6 then count QS in V1+V3

\*\* (RAO) if P positive amp in V1 ≥ 0.1mV or aVF P ≥ 0.175 mV, then exclude V1-V2 R-criteria points

\*\*\* (RAO) if P positive amp in V1 ≥ 0.1mV or aVF P ≥ 0.175 mV, then exclude V1-V2 R-criteria points

|                         |         |                               |       |                              |                |
|-------------------------|---------|-------------------------------|-------|------------------------------|----------------|
| <b>Patient ID:</b>      | 20      | <b>QRS Duration:</b>          | 112ms | <b>Amplitude Adjustment:</b> | +16%           |
| <b>Age &amp; Sex:</b>   | 39 Male | <b>QRS Axis:</b>              | -42°  | <b>Duration Adjustment:</b>  | 0%             |
| <b>Conduction Type:</b> | LVH     | <b>Right Atrial Overload:</b> | No    | <b>Total Points</b>          | 7 points (21%) |

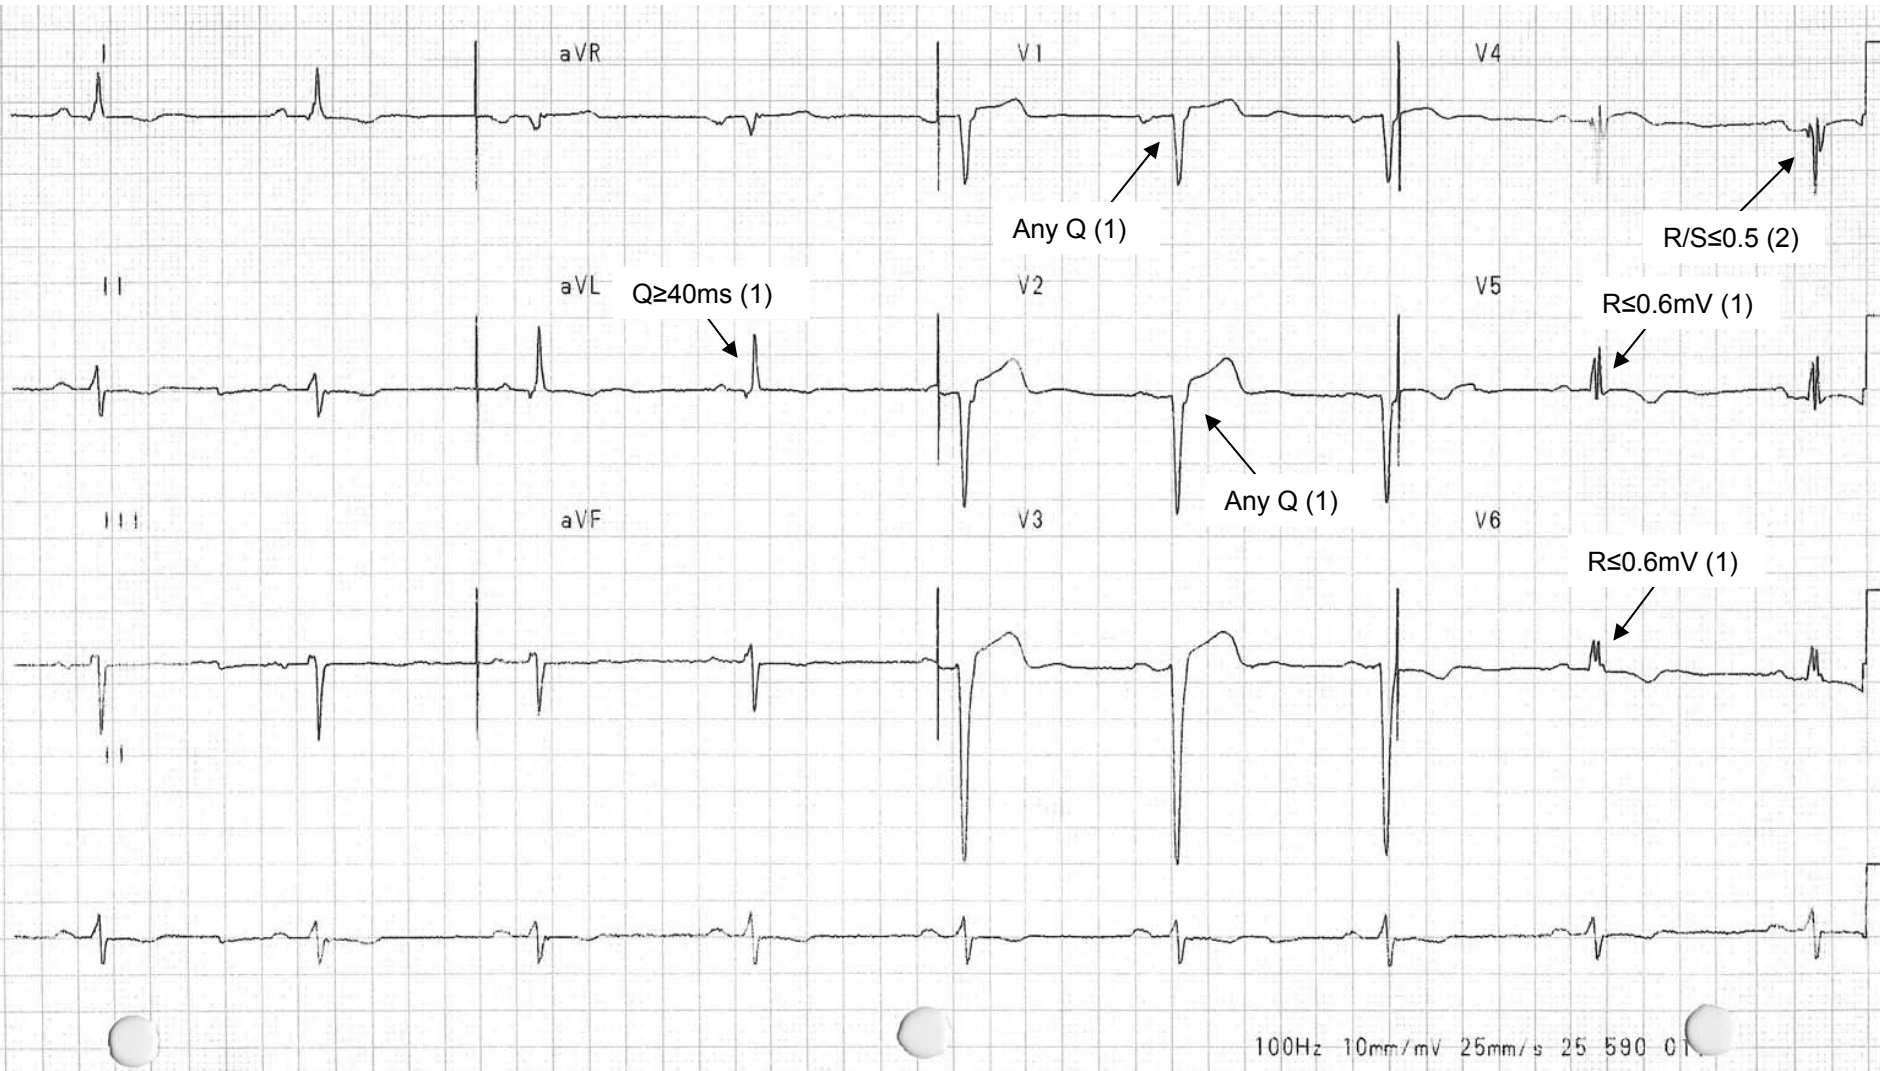

QRS Scoring

Patient ID 20 QRS duration 112ms Amplitude adjust +16%  
 (↑1%/yr age 20-54; ↓1%/yr >55 yrs; ↓ 10% for females)

Age & gender 39 Male QRS axis -42° Duration adjust 0% RAO(\*\*, \*\*\*)Yes(No)  
 (↓ 10% for females)

|         | RBBB                                                                                  |     | LAFB                                                                                  |     | LAFB + RBBB                                                                           |     | LVH                                                                                   |     | No Confounders                                                                        |     |
|---------|---------------------------------------------------------------------------------------|-----|---------------------------------------------------------------------------------------|-----|---------------------------------------------------------------------------------------|-----|---------------------------------------------------------------------------------------|-----|---------------------------------------------------------------------------------------|-----|
| Lead    | Criteria                                                                              | Pts |
| I       | Q ≥ 30 ms<br>R/Q ≤ 1<br>R ≤ 0.2 mV                                                    | 1   | Q ≥ 30 ms<br>R/Q ≤ 1<br>R ≤ 0.2 mV                                                    | 1   | Q ≥ 30 ms<br>R/Q ≤ 1<br>R ≤ 0.2 mV                                                    | 1   | Q ≥ 30 ms<br>R/Q ≤ 1<br>R ≤ 0.2 mV                                                    | 1   | Q ≥ 30 ms<br>R/Q ≤ 1<br>R ≤ 0.2 mV                                                    | 1   |
| II      | Q ≥ 40 ms<br>Q ≥ 30 ms                                                                | 2   | Q ≥ 40 ms<br>Q ≥ 30 ms                                                                | 2   | Q ≥ 40 ms<br>Q ≥ 30 ms                                                                | 2   | Q ≥ 40 ms<br>Q ≥ 30 ms                                                                | 2   | Q ≥ 40 ms<br>Q ≥ 30 ms                                                                | 2   |
| aVL     | Q ≥ 30 ms<br>R/Q ≤ 1                                                                  | 1   | Q ≥ 40 ms<br>R/Q ≤ 1                                                                  | 1   | Q ≥ 40 ms<br>R/Q ≤ 1                                                                  | 1   | Q ≥ 40 ms<br>R/Q ≤ 1                                                                  | 1   | Q ≥ 30 ms<br>R/Q ≤ 1                                                                  | 1   |
| aVF     | Q ≥ 50 ms<br>Q ≥ 40 ms<br>Q ≥ 30 ms<br>R/Q ≤ 1<br>R/Q ≤ 2                             | 3   | Q ≥ 50 ms<br>Q ≥ 40 ms<br>Q ≥ 30 ms<br>R/Q ≤ 1<br>R/Q ≤ 2                             | 3   | Q ≥ 50 ms<br>Q ≥ 40 ms<br>Q ≥ 30 ms<br>R/Q ≤ 1<br>R/Q ≤ 2                             | 3   | Q ≥ 60 ms<br>Q ≥ 50 ms<br>Q ≥ 40 ms<br>R/Q ≤ 1<br>R/Q ≤ 2                             | 3   | Q ≥ 50 ms<br>Q ≥ 40 ms<br>Q ≥ 30 ms<br>R/Q ≤ 1<br>R/Q ≤ 2                             | 3   |
| V1      | Q ≥ 50 ms                                                                             | 2   | Q ≥ 50 ms                                                                             | 2   | Q ≥ 50 ms                                                                             | 2   | any QR<br>(or any Q if *)<br>NtchInit40                                               | 1   | any QR<br>(or any Q if *)<br>NtchInit40                                               | 1   |
| Ant.    | any Q<br>Init R ≤ 20 ms                                                               | 1   | any QR                                                                                | 1   | any Q                                                                                 | 1   | any QR<br>(or any Q if *)<br>NtchInit40                                               | 1   | any Q                                                                                 | 1   |
| V1      | Init R ≥ 60 ms<br>Init R ≥ 15 mV<br>Init R ≥ 50 ms<br>Init R ≥ 10 mV                  | 2   | R ≥ 50 ms<br>R ≥ 1mV<br>R ≥ 40 ms<br>R ≥ 0.7 mV                                       | 2   | Init R ≥ 60 ms<br>Init R ≥ 15 mV<br>Init R ≥ 50 ms<br>Init R ≥ 10 mV                  | 2   | R ≥ 50 ms<br>R ≥ 1mV<br>R ≥ 40 ms<br>R ≥ 0.7 mV                                       | 2   | R ≥ 50 ms<br>R ≥ 1mV<br>R ≥ 40 ms<br>R ≥ 0.7 mV                                       | 2   |
| Post.** |                                                                                       |     |                                                                                       |     |                                                                                       |     |                                                                                       |     |                                                                                       |     |
| V2      | Q ≥ 50 ms<br>any Q<br>R ≤ 10 ms<br>R ≤ 0.1mV                                          | 2   | any QR<br>R ≤ 10 ms<br>R ≤ 0.1mV                                                      | 1   | Q ≥ 50 ms<br>any Q<br>R ≤ 10 ms<br>R ≤ 0.1mV                                          | 2   | any QR<br>(or any Q if *)<br>NtchInit40                                               | 1   | any Q<br>R ≤ 10 ms<br>R ≤ 0.1mV                                                       | 1   |
| Ant.    |                                                                                       |     |                                                                                       |     |                                                                                       |     |                                                                                       |     |                                                                                       |     |
| V2      | Init R ≥ 70 ms<br>Init R ≥ 2.5 mV<br>Init R ≥ 50 ms<br>Init R ≥ 2.0 mV                | 2   | R ≥ 60 ms<br>R ≥ 2 mV<br>R ≥ 50 ms<br>R ≥ 15 mV                                       | 2   | Init R ≥ 70 ms<br>Init R ≥ 2.5 mV<br>Init R ≥ 50 ms<br>Init R ≥ 2.0 mV                | 2   | R ≥ 60 ms<br>R ≥ 2 mV<br>R ≥ 50 ms<br>R ≥ 15 mV                                       | 2   | R ≥ 60 ms<br>R ≥ 2 mV<br>R ≥ 50 ms<br>R ≥ 15 mV                                       | 2   |
| Post.** |                                                                                       |     |                                                                                       |     |                                                                                       |     |                                                                                       |     |                                                                                       |     |
| V3      | Q ≥ 30 ms<br>R ≤ 10 ms<br>Q ≥ 20 ms<br>R ≤ 20 ms                                      | 2   | Q ≥ 30 ms<br>R ≤ 10 ms<br>Q ≥ 20 ms<br>R ≤ 20 ms                                      | 2   | Q ≥ 30 ms<br>R ≤ 10 ms<br>Q ≥ 20 ms<br>R ≤ 20 ms                                      | 2   | QR & (Q ≥ 30 ms)<br>NtchInit40<br>any QR<br>(or any Q if *)                           | 2   | Q ≥ 30 ms<br>R ≤ 10 ms<br>Q ≥ 20 ms<br>R ≤ 20 ms                                      | 2   |
| V4      | Q ≥ 20 ms<br>R/Q ≤ 0.5<br>R/S ≤ 0.5<br>R/Q ≤ 1<br>R/S ≤ 1<br>R ≤ 0.5 mV<br>NtchInit40 | 1   | Q ≥ 20 ms<br>R/Q ≤ 0.5<br>R/S ≤ 0.5<br>R/Q ≤ 1<br>R/S ≤ 1<br>R ≤ 0.5 mV<br>NtchInit40 | 1   | Q ≥ 20 ms<br>R/Q ≤ 0.5<br>R/S ≤ 0.5<br>R/Q ≤ 1<br>R/S ≤ 1<br>R ≤ 0.5 mV<br>NtchInit40 | 1   | Q ≥ 20 ms<br>R/Q ≤ 0.5<br>R/S ≤ 0.5<br>R/Q ≤ 1<br>R/S ≤ 1<br>R ≤ 0.5 mV<br>NtchInit40 | 1   | Q ≥ 20 ms<br>R/Q ≤ 0.5<br>R/S ≤ 0.5<br>R/Q ≤ 1<br>R/S ≤ 1<br>R ≤ 0.5 mV<br>NtchInit40 | 1   |
| V5      | Q ≥ 30 ms<br>R/Q ≤ 1<br>R/S ≤ 1<br>R/Q ≤ 2<br>R/S ≤ 2<br>R ≤ 0.6 mV<br>NtchInit40     | 1   | Q ≥ 30 ms<br>R/Q ≤ 1<br>R/S ≤ 1<br>R/Q ≤ 2<br>R/S ≤ 2<br>R ≤ 0.6 mV<br>NtchInit40     | 1   | Q ≥ 30 ms<br>R/Q ≤ 1<br>R/S ≤ 1<br>R/Q ≤ 2<br>R/S ≤ 2<br>R ≤ 0.6 mV<br>NtchInit40     | 1   | Q ≥ 30 ms<br>R/Q ≤ 1<br>R/S ≤ 1<br>R/Q ≤ 2<br>R/S ≤ 2<br>R ≤ 0.6 mV<br>NtchInit40     | 1   | Q ≥ 30 ms<br>R/Q ≤ 1<br>R/S ≤ 1<br>R/Q ≤ 2<br>R/S ≤ 2<br>R ≤ 0.6 mV<br>NtchInit40     | 1   |
| V6      | Q ≥ 30 ms<br>R/Q ≤ 1<br>R/S ≤ 1<br>R/Q ≤ 3<br>R/S ≤ 3<br>R ≤ 0.6 mV<br>NtchInit40     | 1   | Q ≥ 30 ms<br>R/Q ≤ 1<br>R/S ≤ 1<br>R/Q ≤ 3<br>R/S ≤ 2<br>R ≤ 0.6 mV<br>NtchInit40     | 1   | Q ≥ 30 ms<br>R/Q ≤ 1<br>R/S ≤ 1<br>R/Q ≤ 3<br>R/S ≤ 2<br>R ≤ 0.6 mV<br>NtchInit40     | 1   | Q ≥ 30 ms<br>R/Q ≤ 1<br>R/S ≤ 1<br>R/Q ≤ 3<br>R/S ≤ 3<br>R ≤ 0.6 mV<br>NtchInit40     | 1   | Q ≥ 30 ms<br>R/Q ≤ 1<br>R/S ≤ 1<br>R/Q ≤ 3<br>R/S ≤ 3<br>R ≤ 0.6 mV<br>NtchInit40     | 1   |
| Total   | Points                                                                                |     | Points                                                                                |     | Points                                                                                |     | Points                                                                                | 6   | Points                                                                                |     |

| LBBB  |                                                            |     |
|-------|------------------------------------------------------------|-----|
| Lead  | Criteria                                                   | Pts |
| I     | any Q<br>R/Q ≤ 1<br>R/S ≤ 1                                | 1   |
| II    | R/Q ≤ 15<br>R/S ≤ 15                                       | 1   |
| aVL   | Q ≥ 40 ms<br>Q ≥ 30 ms                                     | 2   |
| aVF   | R/Q ≤ 0.5<br>R/S ≤ 0.5                                     | 1   |
| V1    | Q ≥ 50 ms<br>Q ≥ 40 ms<br>R/S ≤ 0.5                        | 2   |
| Ant.  | R/Q ≤ 0.5<br>R/S ≤ 1<br>R/Q ≤ 1                            | 1   |
| V1    | Q ≥ 50 ms<br>Q ≥ 40 ms<br>R/S ≤ 0.5                        | 2   |
| Ant.  | R/Q ≤ 0.5<br>R/S ≤ 1<br>R/Q ≤ 1                            | 1   |
| V1    | NtchInit40                                                 | 1   |
| Ant.  | R ≥ 0.3 mV<br>R ≥ 30 ms<br>R ≥ 0.2 mV<br>R ≥ 20 ms         | 2   |
| V1    | S/S' ≥ 2.0                                                 | 3   |
| Post  | S/S' ≥ 15<br>S/S' ≥ 125                                    | 2   |
| V2    | NtchInit40                                                 | 1   |
| Ant.  | R ≥ 0.4 mV<br>R ≥ 30 ms<br>R ≥ 0.3 mV<br>R ≥ 20 ms         | 2   |
| V2    | S/S' ≥ 2.5                                                 | 3   |
| Post  | S/S' ≥ 2.0<br>S/S' ≥ 15                                    | 2   |
| V5    | any Q<br>R/R' ≥ 2<br>R/R' ≥ 1<br>R/S ≤ 2<br>R ≤ 0.5 mV     | 1   |
| V6    | Q ≥ 20 ms<br>R/R' ≥ 2<br>R/R' ≥ 1<br>R/S ≤ 2<br>R ≤ 0.6 mV | 1   |
| Total | Points                                                     |     |

%LV infarct       
 (3 #pts)

%LV infarct      %LV infarct      %LV infarct      %LV infarct 18 %LV infarct       
 (3 x #pts) (3 x #pts) (3 x #pts) (3 x #pts) (3 x #pts)

\*(for LVH) if ≥4 other points in leads I, aVL, V4, V5 or V6 then count QS in V1+V3  
 \*\* (RAO) if P positive amp in V1 ≥ 0.1mV or aVF P ≥ 0.175 mV, then exclude V1-V2 R-criteria points  
 \*\*\* (RAO) if P positive amp in V1 ≥ 0.1mV or aVF P ≥ 0.175 mV, then exclude V1-V2 R-criteria points



|                         |         |                               |       |                              |                |
|-------------------------|---------|-------------------------------|-------|------------------------------|----------------|
| <b>Patient ID:</b>      | 21      | <b>QRS Duration:</b>          | 138ms | <b>Amplitude Adjustment:</b> | -13%           |
| <b>Age &amp; Sex:</b>   | 68 Male | <b>QRS Axis:</b>              | -87°  | <b>Duration Adjustment:</b>  | 0%             |
| <b>Conduction Type:</b> | LAFB    | <b>Right Atrial Overload:</b> | No    | <b>Total Points:</b>         | 9 points (27%) |

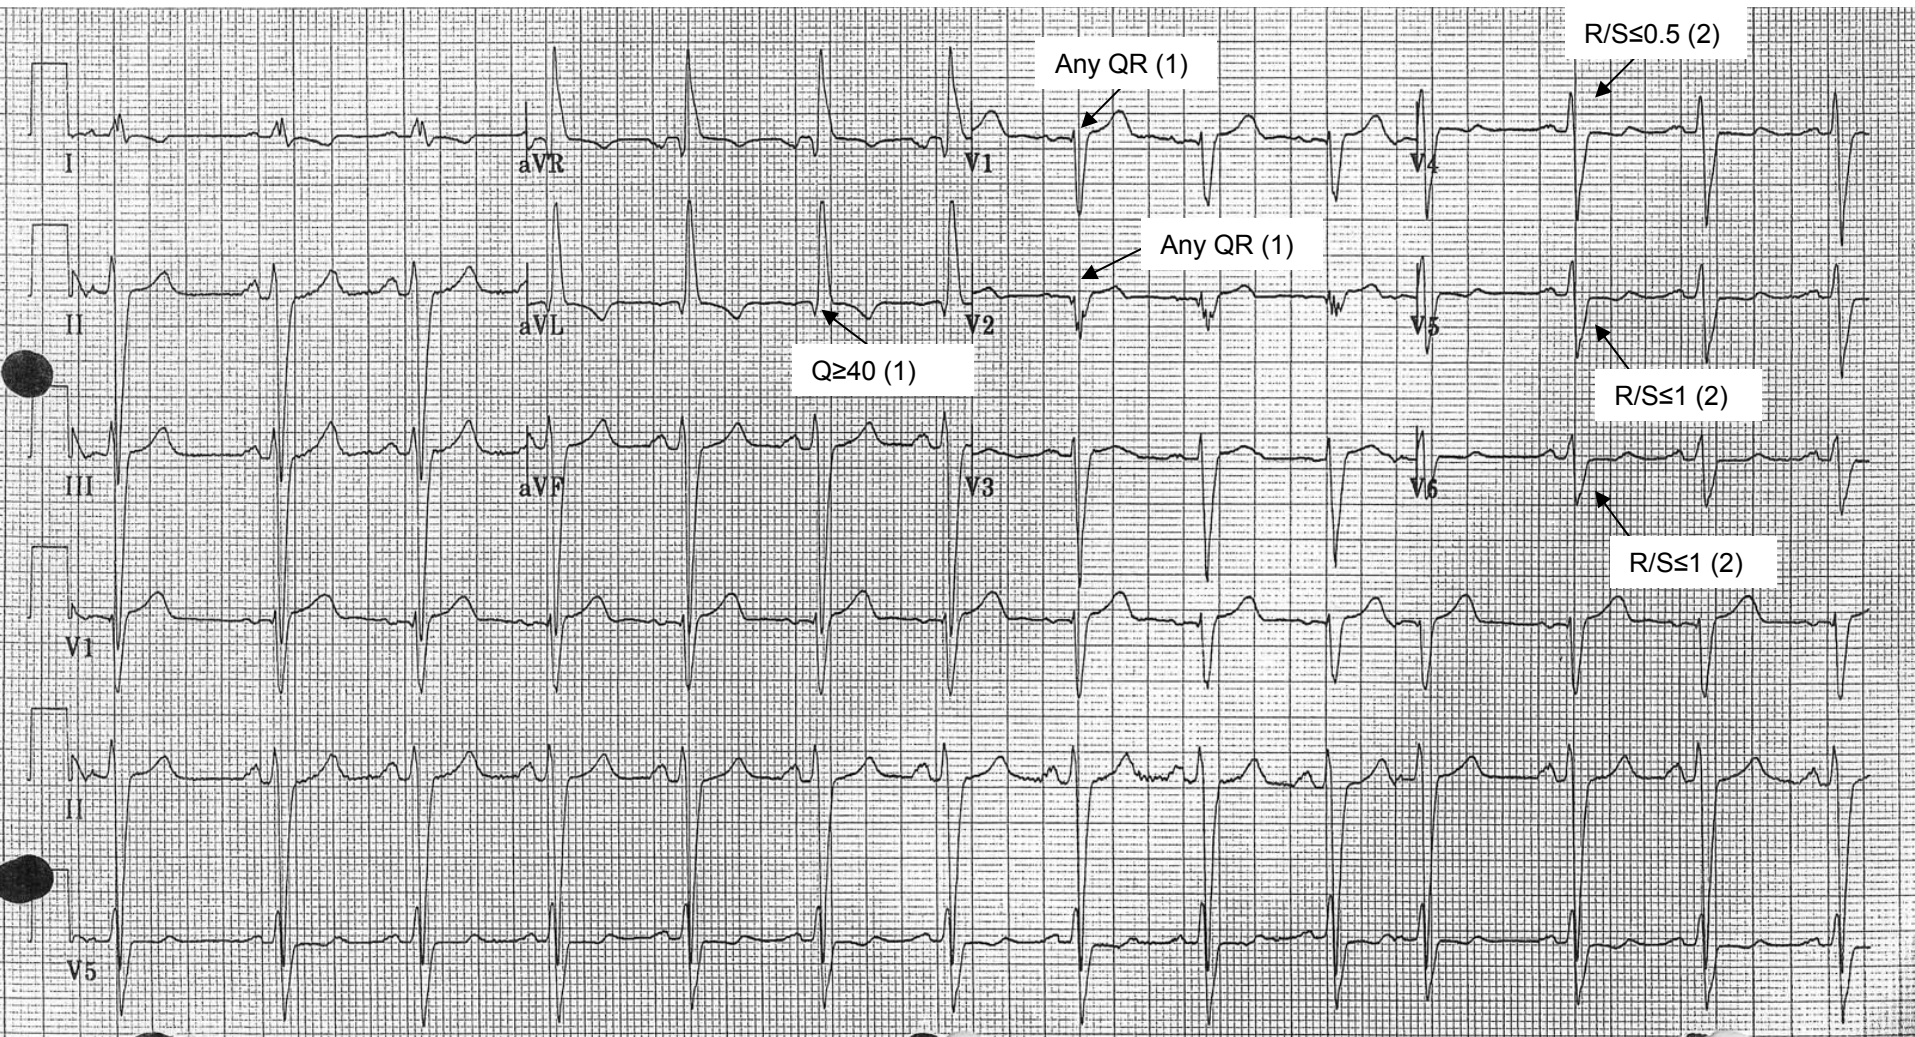

QRS Scoring

Patient ID 21

QRS duration 138ms

Amplitude adjust -13%

(↑1%/yr age 20-54; ↓1%/yr >55 yrs; ↓ 10% for females)

Age & gender 68 Male

QRS axis -87°

Duration adjust 0%

RAO(\*\*, \*\*\*)Yes(No)

(↓ 10% for females)

|              | RBBB            |     | LAFB          |          | LAFB + RBBB     |     | LVH             |     | No Confounders |     |
|--------------|-----------------|-----|---------------|----------|-----------------|-----|-----------------|-----|----------------|-----|
| Lead         | Criteria        | Pts | Criteria      | Pts      | Criteria        | Pts | Criteria        | Pts | Criteria       | Pts |
| I            | Q ≥ 30 ms       | 1   | Q ≥ 30 ms     | 1        | Q ≥ 30 ms       | 1   | Q ≥ 30 ms       | 1   | Q ≥ 30 ms      | 1   |
|              | R/Q ≤ 1         | 1   | R/Q ≤ 1       | 1        | R/Q ≤ 1         | 1   | R/Q ≤ 1         | 1   | R/Q ≤ 1        | 1   |
|              | R ≤ 0.2 mV      |     | R ≤ 0.2 mV    |          | R ≤ 0.2 mV      |     | R ≤ 0.2 mV      |     | R ≤ 0.2 mV     |     |
| II           | Q ≥ 40 ms       | 2   | Q ≥ 40 ms     | 2        | Q ≥ 40 ms       | 2   | Q ≥ 40 ms       | 2   | Q ≥ 40 ms      | 2   |
|              | Q ≥ 30 ms       | 1   | Q ≥ 30 ms     | 1        | Q ≥ 30 ms       | 1   | Q ≥ 30 ms       | 1   | Q ≥ 30 ms      | 1   |
|              | Q ≥ 30 ms       | 1   | Q ≥ 40 ms     | 1        | Q ≥ 40 ms       | 1   | Q ≥ 40 ms       | 1   | Q ≥ 30 ms      | 1   |
| aVL          | Q ≥ 30 ms       | 1   | Q ≥ 40 ms     | 1        | Q ≥ 40 ms       | 1   | Q ≥ 40 ms       | 1   | Q ≥ 30 ms      | 1   |
| aVF          | Q ≥ 50 ms       | 3   | Q ≥ 50 ms     | 3        | Q ≥ 50 ms       | 3   | Q ≥ 60 ms       | 3   | Q ≥ 50 ms      | 3   |
|              | Q ≥ 40 ms       | 2   | Q ≥ 40 ms     | 2        | Q ≥ 40 ms       | 2   | Q ≥ 50 ms       | 2   | Q ≥ 40 ms      | 2   |
|              | Q ≥ 30 ms       | 1   | Q ≥ 30 ms     | 1        | Q ≥ 30 ms       | 1   | Q ≥ 40 ms       | 1   | Q ≥ 30 ms      | 1   |
| V1           | Q ≥ 50 ms       | 2   | Q ≥ 50 ms     | 2        | Q ≥ 50 ms       | 2   | any QR          | 2   | Q ≥ 50 ms      | 2   |
|              | any Q           | 1   | any QR        | 1        | any Q           | 1   | (or any Q if *) | 1   | any Q          | 1   |
|              | Init R ≤ 2.0 mV |     |               |          |                 |     | NtchInit40      |     |                |     |
| Post.*       | Init R ≥ 60 ms  | 2   | R ≥ 50 ms     | 2        | Init R ≥ 60 ms  | 2   | R ≥ 50 ms       | 2   | R ≥ 50 ms      | 2   |
|              | Init R ≥ 15 mV  |     | R ≥ 1mV       |          | Init R ≥ 15 mV  |     | R ≥ 1mV         |     | R ≥ 1mV        |     |
|              | Init R ≥ 50 ms  | 1   | R ≥ 40 ms     | 1        | Init R ≥ 50 ms  | 1   | R ≥ 40 ms       | 1   | R ≥ 40 ms      | 1   |
| V2           | Q ≥ 50 ms       | 2   | Q ≥ 50 ms     | 2        | Q ≥ 50 ms       | 2   | any QR          | 1   | any Q          | 1   |
|              | any Q           | 1   | any QR        | 1        | any Q           | 1   | (or any Q if *) | 1   | R ≤ 10 ms      | 1   |
|              | R ≤ 10 ms       |     | R ≤ 10 ms     |          | R ≤ 10 ms       |     | NtchInit40      |     | R ≤ 0.1mV      |     |
| Post.**      | Init R ≥ 70 ms  | 2   | R ≥ 60 ms     | 2        | Init R ≥ 70 ms  | 2   | R ≥ 60 ms       | 2   | R ≥ 60 ms      | 2   |
|              | Init R ≥ 2.5 mV |     | R ≥ 2 mV      |          | Init R ≥ 2.5 mV |     | R ≥ 2 mV        |     | R ≥ 2 mV       |     |
|              | Init R ≥ 50 ms  | 1   | R ≥ 50 ms     | 1        | Init R ≥ 50 ms  | 1   | R ≥ 50 ms       | 1   | R ≥ 50 ms      | 1   |
| V3           | Q ≥ 30 ms       | 2   | Q ≥ 30 ms     | 2        | Q ≥ 30 ms       | 2   | OR&(Q ≥ 30 ms)  | 2   | Q ≥ 30 ms      | 2   |
|              | R ≤ 10 ms       |     | R ≤ 10 ms     |          | R ≤ 10 ms       |     | NtchInit40      |     | R ≤ 10 ms      |     |
|              | Q ≥ 20 ms       | 1   | Q ≥ 20 ms     | 1        | Q ≥ 20 ms       | 1   | any QR          | 1   | Q ≥ 20 ms      | 1   |
| V4           | Q ≥ 20 ms       | 1   | Q ≥ 20 ms     | 1        | Q ≥ 20 ms       | 1   | Q ≥ 20 ms       | 1   | Q ≥ 20 ms      | 1   |
|              | R/Q ≤ 0.5       | 2   | R/Q ≤ 0.5     | 2        | R/Q ≤ 0.5       | 2   | R/Q ≤ 0.5       | 2   | R/Q ≤ 0.5      | 2   |
|              | R/S ≤ 0.5       |     | R/S ≤ 0.5     |          | R/S ≤ 0.5       |     | R/S ≤ 0.5       |     | R/S ≤ 0.5      |     |
| V5           | Q ≥ 30 ms       | 1   | Q ≥ 30 ms     | 1        | Q ≥ 30 ms       | 1   | Q ≥ 30 ms       | 1   | Q ≥ 30 ms      | 1   |
|              | R/Q ≤ 1         | 2   | R/Q ≤ 1       | 2        | R/Q ≤ 1         | 2   | R/Q ≤ 1         | 2   | R/Q ≤ 1        | 2   |
|              | R/S ≤ 1         |     | R/S ≤ 1       |          | R/S ≤ 1         |     | R/S ≤ 1         |     | R/S ≤ 1        |     |
| V6           | Q ≥ 30 ms       | 1   | Q ≥ 30 ms     | 1        | Q ≥ 30 ms       | 1   | Q ≥ 30 ms       | 1   | Q ≥ 30 ms      | 1   |
|              | R/Q ≤ 1         | 2   | R/Q ≤ 1       | 2        | R/Q ≤ 1         | 2   | R/Q ≤ 1         | 2   | R/Q ≤ 1        | 2   |
|              | R/S ≤ 1         |     | R/S ≤ 1       |          | R/S ≤ 1         |     | R/S ≤ 1         |     | R/S ≤ 1        |     |
| <b>Total</b> | <b>Points</b>   |     | <b>Points</b> | <b>9</b> | <b>Points</b>   |     | <b>Points</b>   |     | <b>Points</b>  |     |

| LBBB    |            |     |
|---------|------------|-----|
| Lead    | Criteria   | Pts |
| I       | any Q      | 1   |
|         | R/Q ≤ 1    | 2   |
|         | R/S ≤ 1    |     |
| II      | R/Q ≤ 15   | 1   |
|         | R/S ≤ 15   |     |
|         | Q ≥ 40 ms  | 2   |
| aVL     | Q ≥ 40 ms  | 2   |
|         | Q ≥ 30 ms  | 1   |
|         | R/Q ≤ 0.5  | 1   |
| aVF     | R/S ≤ 0.5  | 1   |
|         | Q ≥ 50 ms  | 2   |
|         | Q ≥ 40 ms  | 1   |
| V1      | R/Q ≤ 15   | 1   |
|         | R/S ≤ 0.5  | 2   |
|         | R/Q ≤ 0.5  |     |
| aVF     | R/S ≤ 1    | 1   |
|         | Q ≥ 50 ms  | 2   |
|         | Q ≥ 40 ms  | 1   |
| V1      | Q ≥ 50 ms  | 2   |
|         | Q ≥ 40 ms  | 1   |
|         | R/Q ≤ 0.5  | 1   |
| Ant.*** | R/Q ≤ 0.5  | 1   |
|         | R ≥ 0.3 mV | 2   |
|         | R ≥ 30 ms  | 1   |
| V1      | R ≥ 0.2 mV | 1   |
|         | R ≥ 20 ms  | 1   |
|         | S/S' ≥ 2.0 | 3   |
| Post    | S/S' ≥ 1.5 | 2   |
|         | S/S' ≥ 125 | 1   |
|         | NchInit40  | 1   |
| Ant.*** | R ≥ 0.4 mV | 2   |
|         | R ≥ 30 ms  | 1   |
|         | R ≥ 0.3 mV | 1   |
| V2      | R ≥ 20 ms  | 1   |
|         | S/S' ≥ 2.5 | 3   |
|         | S/S' ≥ 2.0 | 2   |
| Post    | S/S' ≥ 1.5 | 1   |
|         | any Q      | 1   |
|         | R/R' ≥ 2   | 2   |
| V5      | R/R' ≥ 1   | 1   |
|         | R/S ≤ 2    | 1   |
|         | R ≤ 0.5 mV | 1   |
| V6      | Q ≥ 20 ms  | 1   |
|         | R/R' ≥ 2   | 2   |
|         | R/R' ≥ 1   | 1   |
| Total   | R/S ≤ 2    | 1   |
|         | R ≤ 0.6 mV | 1   |
|         | Points     |     |

%LV infarct (3 \* #pts) \_\_\_\_\_

%LV infarct (3 x #pts) \_\_\_\_\_ %LV infarct (3 x #pts) 27 %LV infarct (3 x #pts) \_\_\_\_\_ %LV infarct (3 x #pts) \_\_\_\_\_ %LV infarct (3 x #pts) \_\_\_\_\_

\*(for LVH) if ≥4 other points in leads I, aVL, V4, V5 or V6 then count QS in V1+V3  
 \*\* (RAO) if P positive amp in V1 ≥ 0.1mV or aVF P ≥ 0.175 mV, then exclude V1-V2 R-criteria points  
 \*\*\* (RAO) if P positive amp in V1 ≥ 0.1mV or aVF P ≥ 0.175 mV, then exclude V1-V2 R-criteria points

|                         |             |                               |       |                              |                 |
|-------------------------|-------------|-------------------------------|-------|------------------------------|-----------------|
| <b>Patient ID:</b>      | 22          | <b>QRS Duration:</b>          | 130ms | <b>Amplitude Adjustment:</b> | -40%            |
| <b>Age &amp; Sex:</b>   | 85 Female   | <b>QRS Axis:</b>              | -62°  | <b>Duration Adjustment:</b>  | -10%            |
| <b>Conduction Type:</b> | LAFB + RBBB | <b>Right Atrial Overload:</b> | No    | <b>Total Points</b>          | 10 points (30%) |

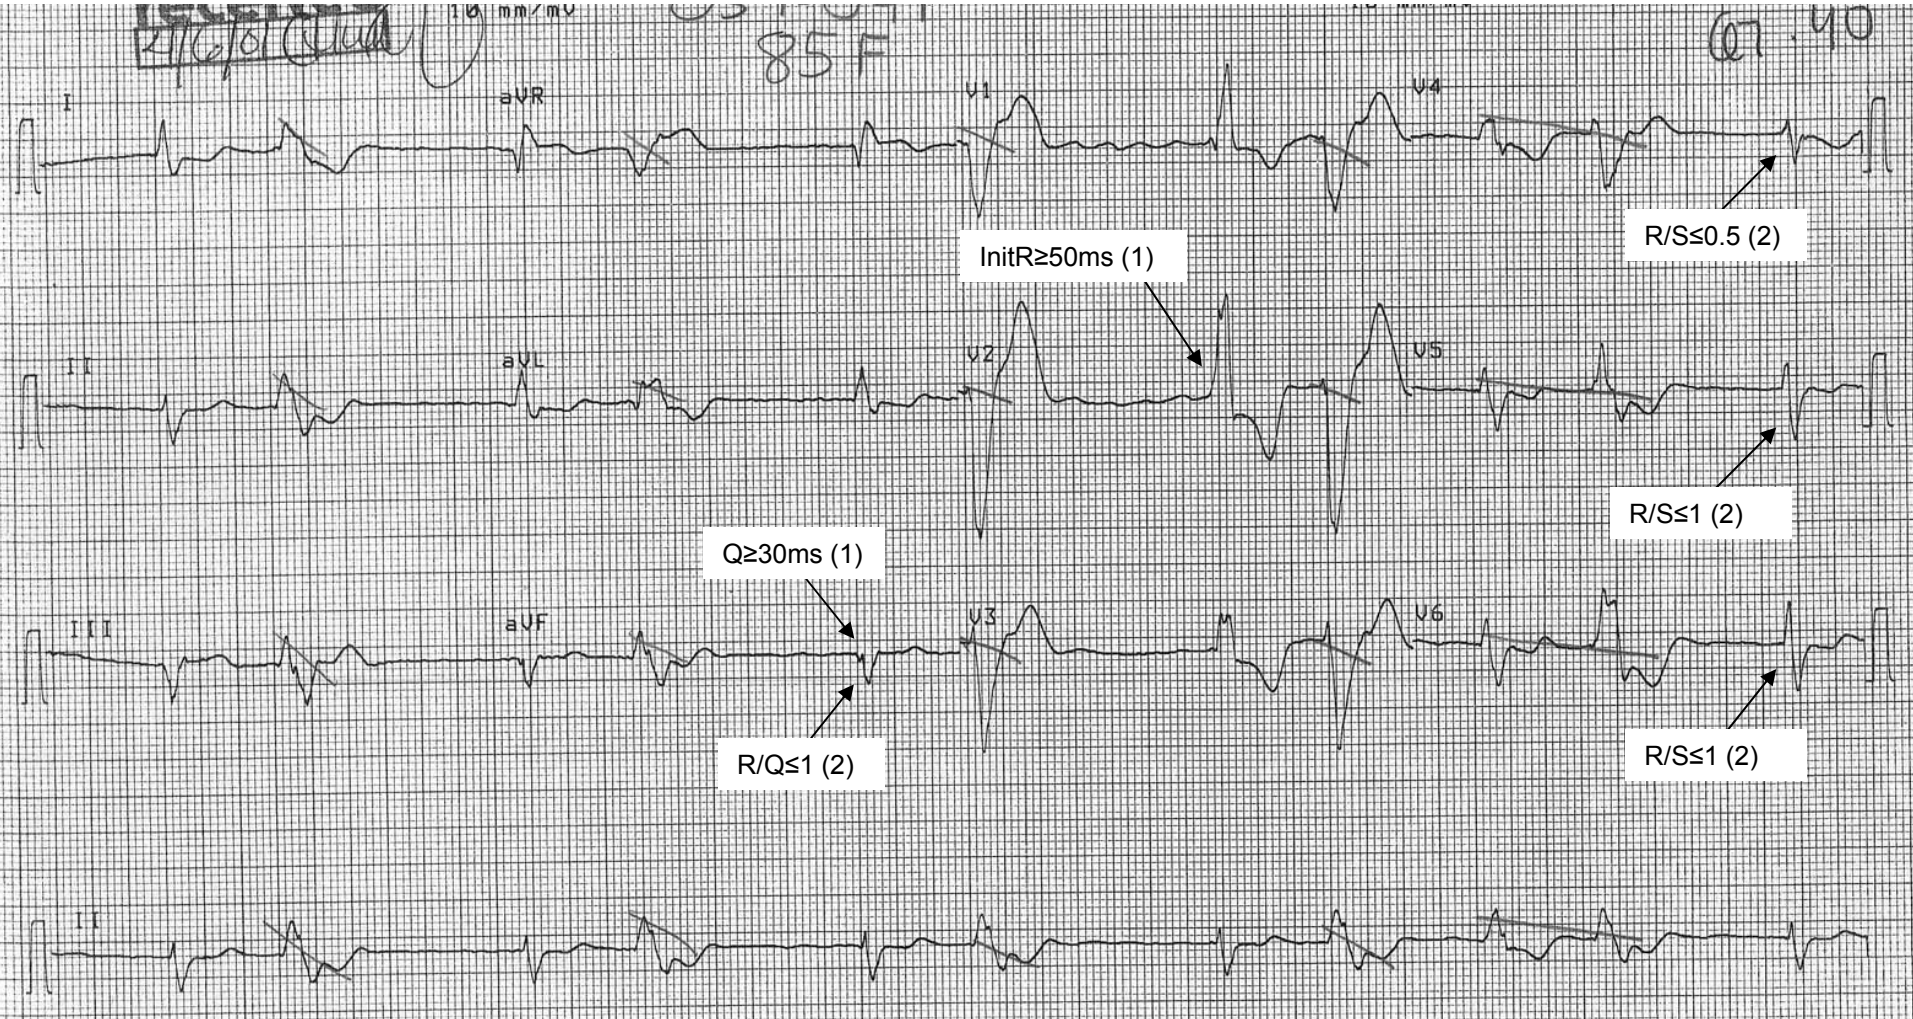

QRS Scoring

Patient ID 22

QRS duration 130ms

Amplitude adjust -40%

(↑1%/yr age 20-54; ↓1%/yr >55 yrs; ↓ 10% for females)

Age & gender 85 Female

QRS axis -62°

Duration adjust -10%

RAO(\*\*, \*\*\*) Yes/No

(↓ 10% for females)

| Lead         | RBBB            |               | LAFB          |               | LAFB + RBBB     |               | LVH              |               | No Confounders |               |
|--------------|-----------------|---------------|---------------|---------------|-----------------|---------------|------------------|---------------|----------------|---------------|
|              | Criteria        | Pts           | Criteria      | Pts           | Criteria        | Pts           | Criteria         | Pts           | Criteria       | Pts           |
| I            | Q ≥ 30 ms       | 1             | Q ≥ 30 ms     | 1             | Q ≥ 30 ms       | 1             | Q ≥ 30 ms        | 1             | Q ≥ 30 ms      | 1             |
|              | R/Q ≤ 1         | 1             | R/Q ≤ 1       | 1             | R/Q ≤ 1         | 1             | R/Q ≤ 1          | 1             | R/Q ≤ 1        | 1             |
|              | R ≤ 0.2 mV      |               | R ≤ 0.2 mV    |               | R ≤ 0.2 mV      |               | R ≤ 0.2 mV       |               | R ≤ 0.2 mV     |               |
| II           | Q ≥ 40 ms       | 2             | Q ≥ 40 ms     | 2             | Q ≥ 40 ms       | 2             | Q ≥ 40 ms        | 2             | Q ≥ 40 ms      | 2             |
|              | Q ≥ 30 ms       | 1             | Q ≥ 30 ms     | 1             | Q ≥ 30 ms       | 1             | Q ≥ 30 ms        | 1             | Q ≥ 30 ms      | 1             |
|              | Q ≥ 30 ms       | 1             | Q ≥ 40 ms     | 1             | Q ≥ 40 ms       | 1             | Q ≥ 40 ms        | 1             | Q ≥ 30 ms      | 1             |
| aVL          | Q ≥ 30 ms       | 1             | Q ≥ 30 ms     | 1             | Q ≥ 30 ms       | 1             | Q ≥ 40 ms        | 1             | Q ≥ 30 ms      | 1             |
|              | R/Q ≤ 1         | 1             | R/Q ≤ 1       | 1             | R/Q ≤ 1         | 1             | R/Q ≤ 1          | 1             | R/Q ≤ 1        | 1             |
|              | Q ≥ 50 ms       | 3             | Q ≥ 50 ms     | 3             | Q ≥ 50 ms       | 3             | Q ≥ 60 ms        | 3             | Q ≥ 50 ms      | 3             |
| aVF          | Q ≥ 40 ms       | 2             | Q ≥ 40 ms     | 2             | Q ≥ 40 ms       | 2             | Q ≥ 50 ms        | 2             | Q ≥ 40 ms      | 2             |
|              | Q ≥ 30 ms       | 1             | Q ≥ 30 ms     | 1             | Q ≥ 30 ms       | 1             | Q ≥ 40 ms        | 1             | Q ≥ 30 ms      | 1             |
|              | R/Q ≤ 1         | 2             | R/Q ≤ 1       | 2             | R/Q ≤ 1         | 2             | R/Q ≤ 1          | 2             | R/Q ≤ 1        | 2             |
| V1           | Q ≥ 50 ms       | 2             | Q ≥ 50 ms     | 2             | Q ≥ 50 ms       | 2             | any QR           | 2             | any QR         | 2             |
|              | any Q           | 1             | any QR        | 1             | any Q           | 1             | (or any Q if *)  | 1             | any Q          | 1             |
|              | Init R ≤ 2.0 mV |               |               |               |                 |               | NtchInit40       |               |                |               |
| Post.*       | Init R ≥ 60 ms  | 2             | R ≥ 50 ms     | 2             | Init R ≥ 60 ms  | 2             | R ≥ 50 ms        | 2             | R ≥ 50 ms      | 2             |
|              | Init R ≥ 15 mV  |               | R ≥ 1mV       |               | Init R ≥ 15 mV  |               | R ≥ 1mV          |               | R ≥ 1mV        |               |
|              | Init R ≥ 50 ms  | 1             | R ≥ 40 ms     | 1             | Init R ≥ 50 ms  | 1             | R ≥ 40 ms        | 1             | R ≥ 40 ms      | 1             |
| V2           | Q ≥ 50 ms       | 2             | any QR        | 1             | Q ≥ 50 ms       | 2             | any QR           | 1             | any Q          | 1             |
|              | any Q           | 1             | R ≤ 10 ms     | 1             | any Q           | 1             | (or any Q if *)  | 1             | R ≤ 10 ms      | 1             |
|              | R ≤ 0.1 mV      |               | R ≤ 0.1 mV    |               | R ≤ 0.1 mV      |               | NtchInit40       |               | R ≤ 0.1 mV     |               |
| Post.**      | Init R ≥ 70 ms  | 2             | R ≥ 60 ms     | 2             | Init R ≥ 70 ms  | 2             | R ≥ 60 ms        | 2             | R ≥ 60 ms      | 2             |
|              | Init R ≥ 2.5 mV |               | R ≥ 2 mV      |               | Init R ≥ 2.5 mV |               | R ≥ 2 mV         |               | R ≥ 2 mV       |               |
|              | Init R ≥ 50 ms  | 1             | R ≥ 50 ms     | 1             | Init R ≥ 50 ms  | 1             | R ≥ 50 ms        | 1             | R ≥ 50 ms      | 1             |
| V3           | Q ≥ 30 ms       | 2             | Q ≥ 30 ms     | 2             | Q ≥ 30 ms       | 2             | QR & (Q ≥ 30 ms) | 2             | Q ≥ 30 ms      | 2             |
|              | R ≤ 10 ms       | 1             | R ≤ 10 ms     | 1             | R ≤ 10 ms       | 1             | NtchInit40       | 1             | R ≤ 10 ms      | 1             |
|              | Q ≥ 20 ms       | 1             | Q ≥ 20 ms     | 1             | Q ≥ 20 ms       | 1             | any QR           | 1             | Q ≥ 20 ms      | 1             |
| V4           | Q ≥ 20 ms       | 1             | Q ≥ 20 ms     | 1             | Q ≥ 20 ms       | 1             | Q ≥ 20 ms        | 1             | Q ≥ 20 ms      | 1             |
|              | R/Q ≤ 0.5       | 2             | R/Q ≤ 0.5     | 2             | R/Q ≤ 0.5       | 2             | R/Q ≤ 0.5        | 2             | R/Q ≤ 0.5      | 2             |
|              | R/S ≤ 0.5       | 1             | R/S ≤ 0.5     | 1             | R/S ≤ 0.5       | 1             | R/S ≤ 0.5        | 1             | R/S ≤ 0.5      | 1             |
| V5           | Q ≥ 30 ms       | 1             | Q ≥ 30 ms     | 1             | Q ≥ 30 ms       | 1             | Q ≥ 30 ms        | 1             | Q ≥ 30 ms      | 1             |
|              | R/Q ≤ 1         | 2             | R/Q ≤ 1       | 2             | R/Q ≤ 1         | 2             | R/Q ≤ 1          | 2             | R/Q ≤ 1        | 2             |
|              | R/S ≤ 1         | 1             | R/S ≤ 1       | 1             | R/S ≤ 1         | 1             | R/S ≤ 1          | 1             | R/S ≤ 1        | 1             |
| V6           | Q ≥ 30 ms       | 1             | Q ≥ 30 ms     | 1             | Q ≥ 30 ms       | 1             | Q ≥ 30 ms        | 1             | Q ≥ 30 ms      | 1             |
|              | R/Q ≤ 1         | 2             | R/Q ≤ 1       | 2             | R/Q ≤ 1         | 2             | R/Q ≤ 1          | 2             | R/Q ≤ 1        | 2             |
|              | R/S ≤ 1         | 1             | R/S ≤ 1       | 1             | R/S ≤ 1         | 1             | R/S ≤ 1          | 1             | R/S ≤ 1        | 1             |
| <b>Total</b> | <b>Points</b>   | <b>Points</b> | <b>Points</b> | <b>Points</b> | <b>Points</b>   | <b>Points</b> | <b>Points</b>    | <b>Points</b> | <b>Points</b>  | <b>Points</b> |

| Lead    | Criteria   | Pts    |
|---------|------------|--------|
| I       | any Q      | 1      |
|         | R/Q ≤ 1    | 2      |
|         | R/S ≤ 1    | 1      |
| II      | Q ≥ 40 ms  | 2      |
|         | Q ≥ 30 ms  | 1      |
|         | R/Q ≤ 0.5  | 1      |
| aVL     | Q ≥ 50 ms  | 2      |
|         | Q ≥ 40 ms  | 1      |
|         | R/S ≤ 0.5  | 2      |
| aVF     | Q ≥ 50 ms  | 2      |
|         | Q ≥ 40 ms  | 1      |
|         | R/Q ≤ 0.5  | 1      |
| V1      | NtchInit40 | 1      |
|         | R ≥ 0.3 mV | 2      |
|         | R ≥ 30 ms  | 1      |
| Ant.*** | R ≥ 0.2 mV | 1      |
|         | R ≥ 20 ms  | 1      |
|         | S/S' ≥ 2.0 | 3      |
| Post    | S/S' ≥ 1.5 | 2      |
|         | S/S' ≥ 125 | 1      |
|         | NtchInit40 | 1      |
| Ant.*** | R ≥ 0.4 mV | 2      |
|         | R ≥ 30 ms  | 1      |
|         | R ≥ 0.3 mV | 1      |
| V2      | R ≥ 20 ms  | 1      |
|         | S/S' ≥ 2.5 | 3      |
|         | S/S' ≥ 2.0 | 2      |
| Post    | S/S' ≥ 1.5 | 1      |
|         | any Q      | 1      |
|         | R/R' ≥ 2   | 2      |
| V5      | R/R' ≥ 1   | 1      |
|         | R/S ≤ 2    | 1      |
|         | R ≤ 0.5 mV | 1      |
| V6      | Q ≥ 20 ms  | 1      |
|         | R/R' ≥ 2   | 2      |
|         | R/R' ≥ 1   | 1      |
| Total   | Points     | Points |

%LV infarct       
(3 \* #pts)

%LV infarct         %LV infarct         %LV infarct 30    %LV infarct         %LV infarct       
(3 x #pts)                    (3 x #pts)                    (3 x #pts)                    (3 x #pts)                    (3 x #pts)

\* (for LVH) if ≥4 other points in leads I, aVL, V4, V5 or V6 then count QS in V1+V3

\*\* (RAO) if P positive amp in V1 ≥ 0.1mV or aVF P ≥ 0.175 mV, then exclude V1+V2 R-criteria points

\*\*\* (RAO) if P positive amp in V1 ≥ 0.1mV or aVF P ≥ 0.175 mV, then exclude V1+V2 R-criteria points

|                         |                |                               |      |                              |                |
|-------------------------|----------------|-------------------------------|------|------------------------------|----------------|
| <b>Patient ID:</b>      | 23             | <b>QRS Duration:</b>          | 94ms | <b>Amplitude Adjustment:</b> | +10%           |
| <b>Age &amp; Sex:</b>   | 45 Male        | <b>QRS Axis:</b>              | +60° | <b>Duration Adjustment:</b>  | 0%             |
| <b>Conduction Type:</b> | No Confounders | <b>Right Atrial Overload:</b> | No   | <b>Total Points</b>          | 9 points (27%) |

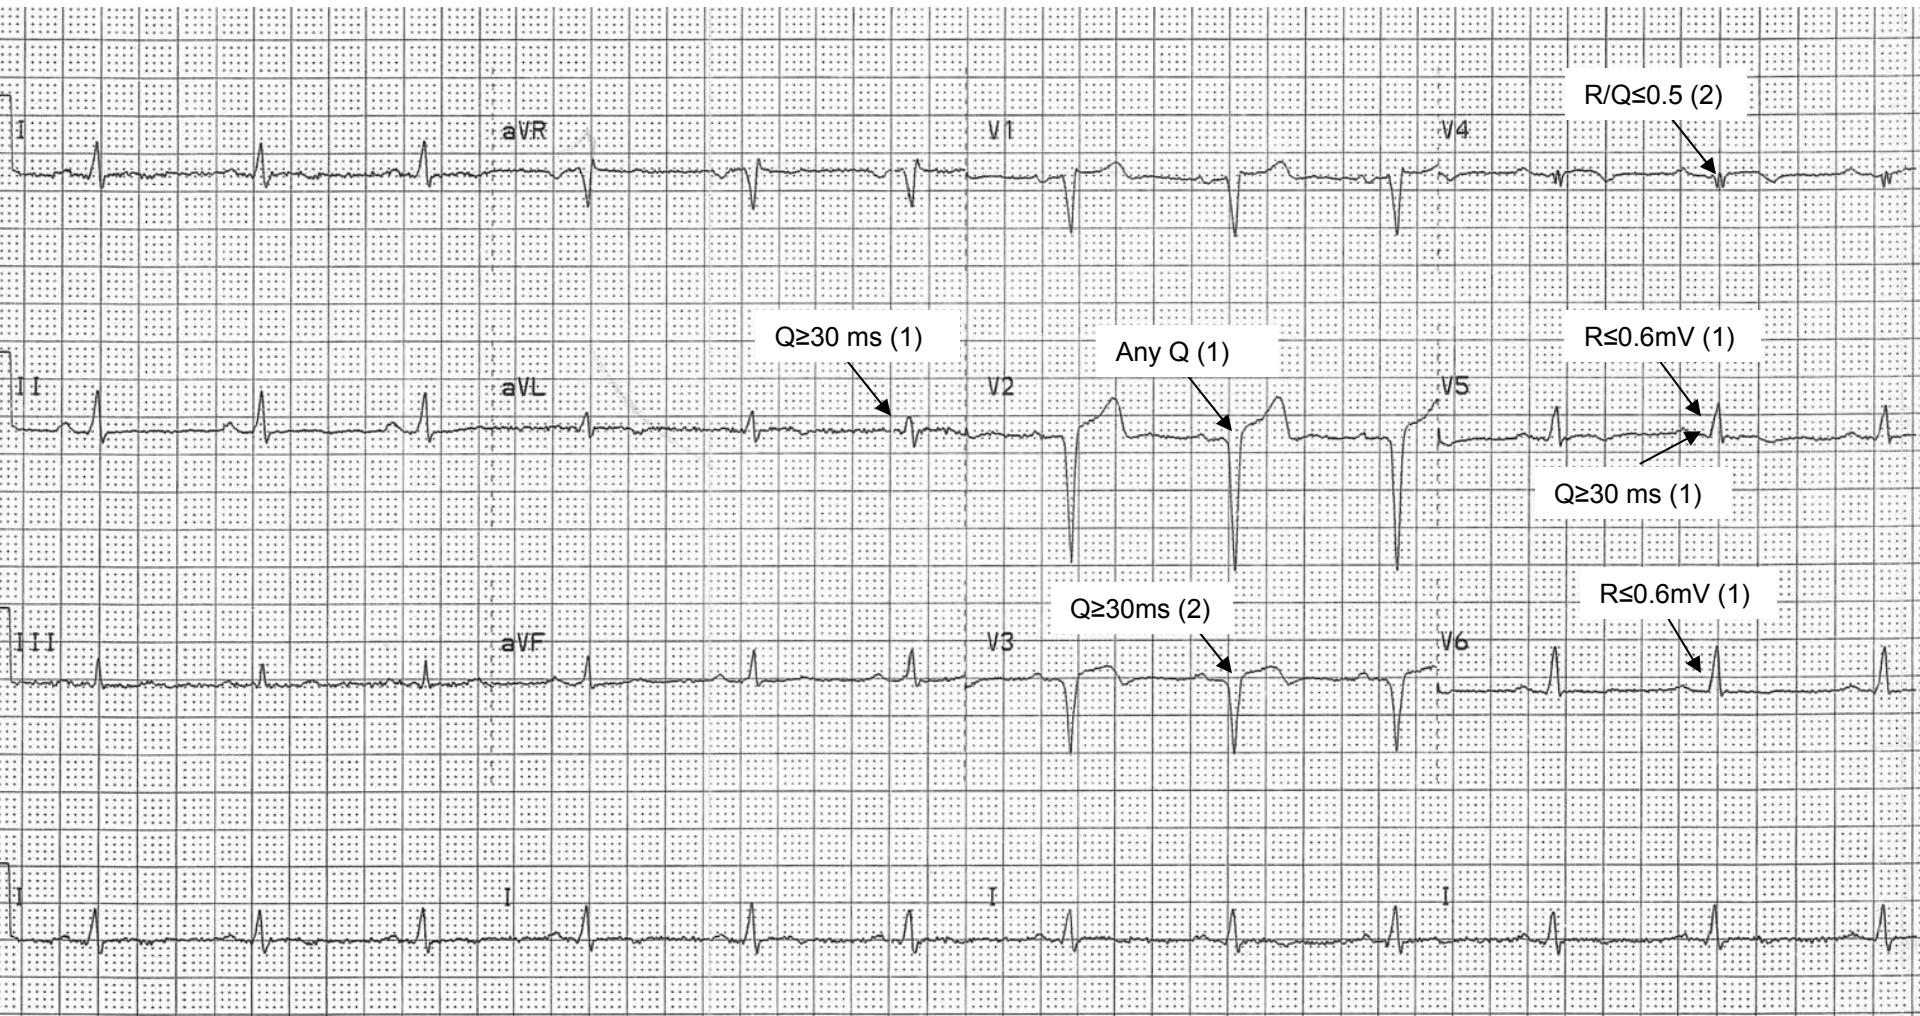

Patient ID 23

QRS duration 94ms

Amplitude adjust +10%  
(↑1%/yr age 20-54; ↓1%/yr >55 yrs; ↓10% for females)

Age & gender 45 Male

QRS axis +60°

Duration adjust 0% RAO(\*\*, \*\*\*)Yes(No)  
(↓ 10% for females)

|        | RBBB            |     | LAFB          |     | LAFB + RBBB     |     | LVH                    |     | No Confounders |     |
|--------|-----------------|-----|---------------|-----|-----------------|-----|------------------------|-----|----------------|-----|
| Lead   | Criteria        | Pts | Criteria      | Pts | Criteria        | Pts | Criteria               | Pts | Criteria       | Pts |
| I      | Q ≥ 30 ms       | 1   | Q ≥ 30 ms     | 1   | Q ≥ 30 ms       | 1   | Q ≥ 30 ms              | 1   | Q ≥ 30 ms      | 1   |
|        | R/Q ≤ 1         | 1   | R/Q ≤ 1       | 1   | R/Q ≤ 1         | 1   | R/Q ≤ 1                | 1   | R/Q ≤ 1        | 1   |
|        | R ≤ 0.2 mV      |     | R ≤ 0.2 mV    |     | R ≤ 0.2 mV      |     | R ≤ 0.2 mV             |     | R ≤ 0.2 mV     |     |
| II     | Q ≥ 40 ms       | 2   | Q ≥ 40 ms     | 2   | Q ≥ 40 ms       | 2   | Q ≥ 40 ms              | 2   | Q ≥ 40 ms      | 2   |
|        | Q ≥ 30 ms       | 1   | Q ≥ 30 ms     | 1   | Q ≥ 30 ms       | 1   | Q ≥ 30 ms              | 1   | Q ≥ 30 ms      | 1   |
| aVL    | Q ≥ 30 ms       | 1   | Q ≥ 40 ms     | 1   | Q ≥ 40 ms       | 1   | Q ≥ 40 ms              | 1   | Q ≥ 30 ms      | 1   |
| aVF    | R/Q ≤ 1         | 1   | R/Q ≤ 1       | 1   | R/Q ≤ 1         | 1   | R/Q ≤ 1                | 1   | R/Q ≤ 1        | 1   |
|        | Q ≥ 50 ms       | 3   | Q ≥ 50 ms     | 3   | Q ≥ 50 ms       | 3   | Q ≥ 60 ms              | 3   | Q ≥ 50 ms      | 3   |
|        | Q ≥ 40 ms       | 2   | Q ≥ 40 ms     | 2   | Q ≥ 40 ms       | 2   | Q ≥ 50 ms              | 2   | Q ≥ 40 ms      | 2   |
| V1     | Q ≥ 30 ms       | 1   | Q ≥ 30 ms     | 1   | Q ≥ 30 ms       | 1   | Q ≥ 40 ms              | 1   | Q ≥ 30 ms      | 1   |
|        | R/Q ≤ 2         | 1   | R/Q ≤ 2       | 1   | R/Q ≤ 2         | 1   | R/Q ≤ 2                | 1   | R/Q ≤ 2        | 1   |
| Ant.   | any Q           | 1   | any QR        | 1   | any Q           | 1   | any QR (or any Q if *) | 1   | any Q          | 1   |
| Post.* | Init R ≤ 20 ms  |     |               |     |                 |     | NtchInit40             |     |                |     |
| V2     | R/S ≥ 1         | 1   | R/S ≥ 1       | 1   | R/S ≥ 1         | 1   | R/S ≥ 1                | 1   | R/S ≥ 1        | 1   |
|        | Init R ≥ 60 ms  | 2   | R ≥ 50 ms     | 2   | Init R ≥ 60 ms  | 2   | R ≥ 50 ms              | 2   | R ≥ 50 ms      | 2   |
|        | Init R ≥ 15 mV  |     | R ≥ 1mV       |     | Init R ≥ 15 mV  |     | R ≥ 1mV                |     | R ≥ 1mV        |     |
| V2     | Init R ≥ 50 ms  | 1   | R ≥ 40 ms     | 1   | Init R ≥ 50 ms  | 1   | R ≥ 40 ms              | 1   | R ≥ 40 ms      | 1   |
|        | Init R ≥ 10 mV  |     | R ≥ 0.7 mV    |     | Init R ≥ 10 mV  |     | R ≥ 0.7 mV             |     | R ≥ 0.7 mV     |     |
| Ant.   | Q ≥ 50 ms       | 2   | any QR        | 1   | Q ≥ 50 ms       | 2   | any QR (or any Q if *) | 1   | any Q          | 1   |
| Post.* | any Q           | 1   | R ≤ 10 ms     |     | any Q           | 1   | R ≤ 10 ms              |     | R ≤ 10 ms      |     |
| V3     | R ≤ 0.1mV       |     | R ≤ 0.1mV     |     | R ≤ 0.1mV       |     | R ≤ 0.1mV              |     | R ≤ 0.1mV      |     |
|        | Init R ≥ 70 ms  | 2   | R ≥ 60 ms     | 2   | Init R ≥ 70 ms  | 2   | R ≥ 60 ms              | 2   | R ≥ 60 ms      | 2   |
|        | Init R ≥ 2.5 mV |     | R ≥ 2 mV      |     | Init R ≥ 2.5 mV |     | R ≥ 2 mV               |     | R ≥ 2 mV       |     |
| V3     | Init R ≥ 50 ms  | 1   | R ≥ 50 ms     | 1   | Init R ≥ 50 ms  | 1   | R ≥ 50 ms              | 1   | R ≥ 50 ms      | 1   |
|        | Init R ≥ 2.0 mV |     | R ≥ 15 mV     |     | Init R ≥ 2.0 mV |     | R ≥ 15 mV              |     | R ≥ 15 mV      |     |
| Ant.   | Q ≥ 50 ms       | 2   | Q ≥ 30 ms     | 1   | Q ≥ 50 ms       | 2   | Q ≥ 30 ms              | 1   | Q ≥ 30 ms      | 1   |
| Post.* | Qs0.2&Ss0.2mV   |     | Qs0.3&Ss0.3mV |     | Qs0.2&Ss0.2mV   |     | Qs0.3&Ss0.3mV          |     | Qs0.2&Ss0.2mV  |     |
| V4     | Q ≥ 30 ms       | 2   | Q ≥ 30 ms     | 2   | Q ≥ 30 ms       | 2   | Q ≥ 30 ms              | 2   | Q ≥ 30 ms      | 2   |
|        | R ≤ 10 ms       |     | R ≤ 10 ms     |     | R ≤ 10 ms       |     | R ≤ 10 ms              |     | R ≤ 10 ms      |     |
|        | Q ≥ 20 ms       | 1   | Q ≥ 20 ms     | 1   | Q ≥ 20 ms       | 1   | Q ≥ 20 ms              | 1   | Q ≥ 20 ms      | 1   |
| V4     | R ≤ 20 ms       |     | R ≤ 20 ms     |     | R ≤ 20 ms       |     | R ≤ 20 ms              |     | R ≤ 20 ms      |     |
|        | Q ≥ 20 ms       | 1   | Q ≥ 20 ms     | 1   | Q ≥ 20 ms       | 1   | Q ≥ 20 ms              | 1   | Q ≥ 20 ms      | 1   |
| V5     | R/Q ≤ 0.5       | 2   | R/Q ≤ 0.5     | 2   | R/Q ≤ 0.5       | 2   | R/Q ≤ 0.5              | 2   | R/Q ≤ 0.5      | 2   |
|        | R/S ≤ 0.5       |     | R/S ≤ 0.5     |     | R/S ≤ 0.5       |     | R/S ≤ 0.5              |     | R/S ≤ 0.5      |     |
|        | R/Q ≤ 1         | 1   | R/Q ≤ 1       | 1   | R/Q ≤ 1         | 1   | R/Q ≤ 1                | 1   | R/Q ≤ 1        | 1   |
| V5     | R/S ≤ 1         |     | R/S ≤ 1       |     | R/S ≤ 1         |     | R/S ≤ 1                |     | R/S ≤ 1        |     |
|        | R ≤ 0.5 mV      |     | R ≤ 0.5 mV    |     | R ≤ 0.5 mV      |     | R ≤ 0.5 mV             |     | R ≤ 0.5 mV     |     |
| Ant.   | NtchInit40      |     | NtchInit40    |     | NtchInit40      |     | NtchInit40             |     | NtchInit40     |     |
| V6     | Q ≥ 30 ms       | 1   | Q ≥ 30 ms     | 1   | Q ≥ 30 ms       | 1   | Q ≥ 30 ms              | 1   | Q ≥ 30 ms      | 1   |
|        | R/Q ≤ 1         | 2   | R/Q ≤ 1       | 2   | R/Q ≤ 1         | 2   | R/Q ≤ 1                | 2   | R/Q ≤ 1        | 2   |
|        | R/S ≤ 1         |     | R/S ≤ 1       |     | R/S ≤ 1         |     | R/S ≤ 1                |     | R/S ≤ 1        |     |
| V6     | R/Q ≤ 3         | 1   | R/Q ≤ 3       | 1   | R/Q ≤ 3         | 1   | R/Q ≤ 3                | 1   | R/Q ≤ 3        | 1   |
|        | R/S ≤ 3         |     | R/S ≤ 2       |     | R/S ≤ 3         |     | R/S ≤ 3                |     | R/S ≤ 3        |     |
| Ant.   | R ≤ 0.6 mV      |     | R ≤ 0.6 mV    |     | R ≤ 0.6 mV      |     | R ≤ 0.6 mV             |     | R ≤ 0.6 mV     |     |
| Post.* | NtchInit40      |     | NtchInit40    |     | NtchInit40      |     | NtchInit40             |     | NtchInit40     |     |
| Total  | Points          |     | Points        |     | Points          |     | Points                 |     | Points         | 9   |

| Lead  | Criteria   | Pts |
|-------|------------|-----|
| I     | any Q      | 1   |
|       | R/Q ≤ 1    | 2   |
|       | R/S ≤ 1    |     |
| II    | R/Q ≤ 15   | 1   |
|       | R/S ≤ 15   |     |
| aVL   | Q ≥ 40 ms  | 2   |
|       | Q ≥ 30 ms  | 1   |
|       | R/Q ≤ 0.5  | 1   |
| aVF   | R/S ≤ 0.5  | 1   |
|       | R/S ≤ 0.5  | 1   |
| aVL   | Q ≥ 50 ms  | 2   |
|       | Q ≥ 40 ms  | 1   |
|       | R/S ≤ 0.5  | 2   |
| aVF   | R/Q ≤ 0.5  | 1   |
|       | R/Q ≤ 0.5  | 1   |
| V1    | NchInit40  | 1   |
| Ant.  | R ≥ 0.3 mV | 2   |
| V1    | R ≥ 30 ms  |     |
|       | R ≥ 0.2 mV | 1   |
|       | R ≥ 20 ms  |     |
| Post  | S/S' ≥ 2.0 | 3   |
| V2    | S/S' ≥ 1.5 | 2   |
|       | S/S' ≥ 125 | 1   |
| Ant.  | NchInit40  | 1   |
| V2    | R ≥ 0.4 mV | 2   |
|       | R ≥ 30 ms  |     |
|       | R ≥ 0.3 mV | 1   |
| V2    | R ≥ 20 ms  |     |
|       | S/S' ≥ 2.5 | 3   |
| Post  | S/S' ≥ 2.0 | 2   |
| V5    | S/S' ≥ 1.5 | 1   |
|       | any Q      |     |
| V6    | R/R' ≥ 2   | 2   |
|       | R/R' ≥ 1   | 1   |
|       | R/S ≤ 2    |     |
| V6    | R ≤ 0.5 mV | 1   |
|       | R/R' ≥ 2   | 2   |
| V6    | R/R' ≥ 1   | 1   |
|       | R/S ≤ 2    |     |
| Total | Points     |     |

%LV infarct \_\_\_\_\_  
(3 \* #pts)

%LV infarct \_\_\_\_\_ 27  
(3 x #pts) (3 x #pts) (3 x #pts) (3 x #pts) (3 x #pts)

\* (for LVH) if ≥4 other points in leads I, aVL, V4, V5 or V6 then count QS in V1+V3

\*\* (RAO) if P positive amp in V1 ≥ 0.1mV or aVF P ≥ 0.175 mV, then exclude V1-V2 Post criteria

\*\*\* (RAO) if P positive amp in V1 ≥ 0.1mV or aVF P ≥ 0.175 mV, then exclude V1-V2 R-criteria points

|                         |           |                               |       |                              |                |
|-------------------------|-----------|-------------------------------|-------|------------------------------|----------------|
| <b>Patient ID:</b>      | 24        | <b>QRS Duration:</b>          | 170ms | <b>Amplitude Adjustment:</b> | -9%            |
| <b>Age &amp; Sex:</b>   | 54 Female | <b>QRS Axis:</b>              | -37°  | <b>Duration Adjustment:</b>  | -10%           |
| <b>Conduction Type:</b> | LBBB      | <b>Right Atrial Overload:</b> | No    | <b>Total Points:</b>         | 8 points (24%) |

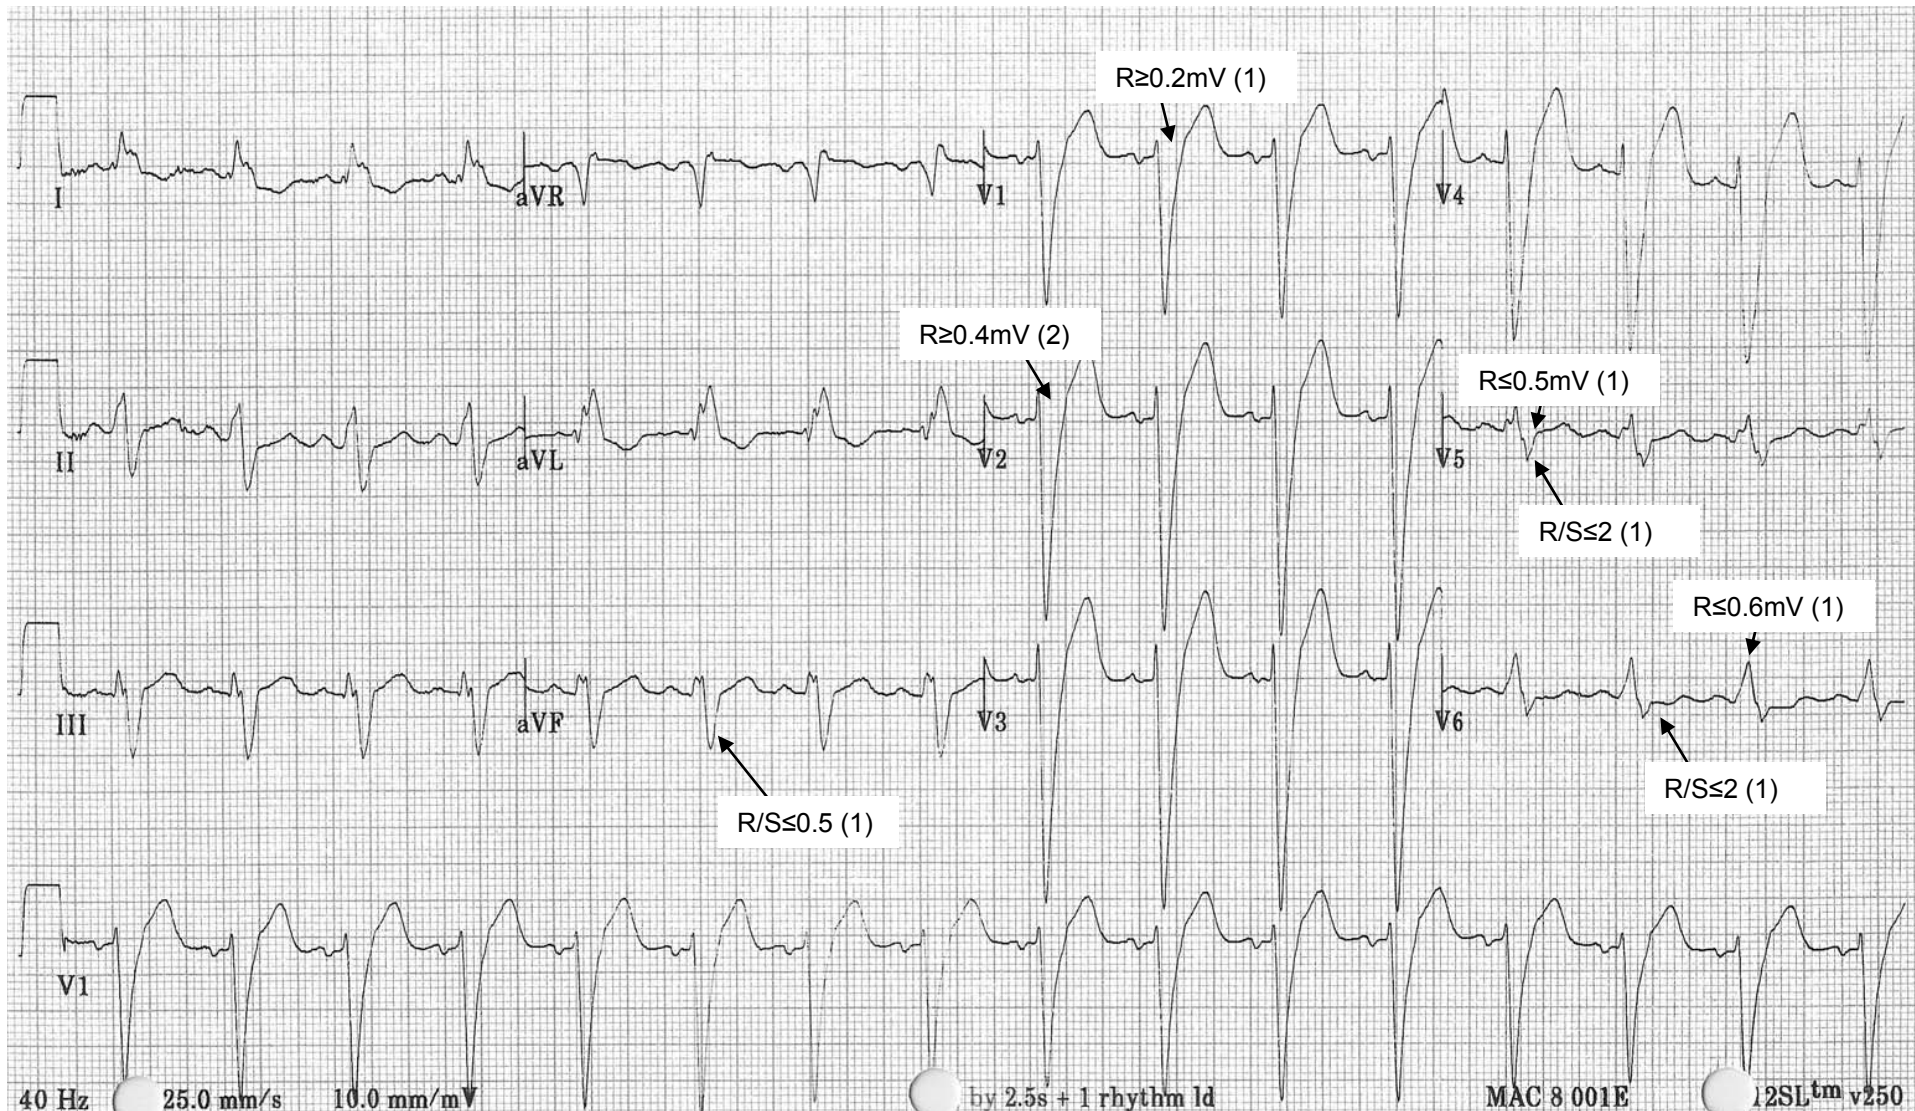

QRS Scoring

Patient ID 24

QRS duration 170ms

Amplitude adjust -9%

(↑1%/yr age 20-54; ↓1%/yr >55 yrs; ↓ 10% for females)

Age & gender 54 Female

QRS axis -37°

Duration adjust -10%

RAO(\*\*, \*\*\*)Yes(No)

(↓ 10% for females)

| Lead       | RBBB            |            | LAFB          |            | LAFB + RBBB     |            | LVH             |            | No Confounders |     |
|------------|-----------------|------------|---------------|------------|-----------------|------------|-----------------|------------|----------------|-----|
|            | Criteria        | Pts        | Criteria      | Pts        | Criteria        | Pts        | Criteria        | Pts        | Criteria       | Pts |
| I          | Q ≥ 30 ms       | 1          | Q ≥ 30 ms     | 1          | Q ≥ 30 ms       | 1          | Q ≥ 30 ms       | 1          | Q ≥ 30 ms      | 1   |
|            | R/Q ≤ 1         | 1          | R/Q ≤ 1       | 1          | R/Q ≤ 1         | 1          | R/Q ≤ 1         | 1          | R/Q ≤ 1        | 1   |
|            | R ≤ 0.2 mV      |            | R ≤ 0.2 mV    |            | R ≤ 0.2 mV      |            | R ≤ 0.2 mV      |            | R ≤ 0.2 mV     |     |
| II         | Q ≥ 40 ms       | 2          | Q ≥ 40 ms     | 2          | Q ≥ 40 ms       | 2          | Q ≥ 40 ms       | 2          | Q ≥ 40 ms      | 2   |
|            | Q ≥ 30 ms       | 1          | Q ≥ 30 ms     | 1          | Q ≥ 30 ms       | 1          | Q ≥ 30 ms       | 1          | Q ≥ 30 ms      | 1   |
|            | Q ≥ 30 ms       | 1          | Q ≥ 40 ms     | 1          | Q ≥ 40 ms       | 1          | Q ≥ 40 ms       | 1          | Q ≥ 30 ms      | 1   |
| aVL        | Q ≥ 30 ms       | 1          | Q ≥ 40 ms     | 1          | Q ≥ 40 ms       | 1          | Q ≥ 40 ms       | 1          | Q ≥ 30 ms      | 1   |
|            | R/Q ≤ 1         | 1          | R/Q ≤ 1       | 1          | R/Q ≤ 1         | 1          | R/Q ≤ 1         | 1          | R/Q ≤ 1        | 1   |
|            | Q ≥ 50 ms       | 3          | Q ≥ 50 ms     | 3          | Q ≥ 50 ms       | 3          | Q ≥ 60 ms       | 3          | Q ≥ 50 ms      | 3   |
| aVF        | Q ≥ 40 ms       | 2          | Q ≥ 40 ms     | 2          | Q ≥ 40 ms       | 2          | Q ≥ 50 ms       | 2          | Q ≥ 40 ms      | 2   |
|            | Q ≥ 30 ms       | 1          | Q ≥ 30 ms     | 1          | Q ≥ 30 ms       | 1          | Q ≥ 40 ms       | 1          | Q ≥ 30 ms      | 1   |
|            | R/Q ≤ 1         | 2          | R/Q ≤ 1       | 2          | R/Q ≤ 1         | 2          | R/Q ≤ 1         | 2          | R/Q ≤ 1        | 2   |
| V1         | R/Q ≤ 2         | 1          | R/Q ≤ 2       | 1          | R/Q ≤ 2         | 1          | R/Q ≤ 2         | 1          | R/Q ≤ 2        | 1   |
|            | Q ≥ 50 ms       | 2          | Q ≥ 50 ms     | 2          | Q ≥ 50 ms       | 2          | any QR          | 2          | any QR         | 2   |
|            | any Q           | 1          | any QR        | 1          | any Q           | 1          | (or any Q if *) | 1          | any Q          | 1   |
| Ant.       | Init R ≤ 20 ms  |            |               |            |                 |            | NtchInit40      |            |                |     |
|            | Init R ≥ 60 ms  | 2          | R ≥ 50 ms     | 2          | Init R ≥ 60 ms  | 2          | R ≥ 50 ms       | 2          | R ≥ 50 ms      | 2   |
|            | Init R ≥ 15 mV  |            | R ≥ 1mV       |            | Init R ≥ 15 mV  |            | R ≥ 1mV         |            | R ≥ 1mV        |     |
| V2         | Init R ≥ 50 ms  | 1          | R ≥ 40 ms     | 1          | Init R ≥ 50 ms  | 1          | R ≥ 40 ms       | 1          | R ≥ 40 ms      | 1   |
|            | Init R ≥ 10 mV  |            | R ≥ 0.7 mV    |            | Init R ≥ 10 mV  |            | R ≥ 0.7 mV      |            | R ≥ 0.7 mV     |     |
|            | Qs0.2&Ss0.2mV   | 1          | Qs0.2&Ss0.2mV | 1          | Qs0.2&Ss0.2mV   | 1          | Qs0.2&Ss0.2mV   | 1          | Qs0.2&Ss0.2mV  | 1   |
| Ant.       | Q ≥ 50 ms       | 2          | any QR        | 1          | Q ≥ 50 ms       | 2          | any QR          | 1          | any Q          | 1   |
|            | any Q           | 1          | R ≤ 10 ms     | 1          | any Q           | 1          | (or any Q if *) | 1          | R ≤ 10 ms      | 1   |
|            | R ≤ 10 ms       |            | R ≤ 0.1mV     |            | R ≤ 10 ms       |            | NtchInit40      |            | R ≤ 0.1mV      |     |
| V2         | R ≤ 0.1mV       |            | R/S ≥ 15      | 1          | R ≤ 0.1mV       |            | R/S ≥ 15        | 1          | R/S ≥ 15       | 1   |
|            | Init R ≥ 70 ms  | 2          | R ≥ 60 ms     | 2          | Init R ≥ 70 ms  | 2          | R ≥ 60 ms       | 2          | R ≥ 60 ms      | 2   |
|            | Init R ≥ 2.5 mV |            | R ≥ 2 mV      |            | Init R ≥ 2.5 mV |            | R ≥ 2 mV        |            | R ≥ 2 mV       |     |
| Post.**    | Init R ≥ 50 ms  | 1          | R ≥ 50 ms     | 1          | Init R ≥ 50 ms  | 1          | R ≥ 50 ms       | 1          | R ≥ 50 ms      | 1   |
|            | Init R ≥ 2.0 mV |            | R ≥ 15 mV     |            | Init R ≥ 2.0 mV |            | R ≥ 15 mV       |            | R ≥ 15 mV      |     |
|            | Qs0.3&Ss0.3mV   | 1          | Qs0.3&Ss0.3mV | 1          | Qs0.3&Ss0.3mV   | 1          | Qs0.3&Ss0.3mV   | 1          | Qs0.3&Ss0.3mV  | 1   |
| V3         | Q ≥ 30 ms       | 2          | Q ≥ 30 ms     | 2          | Q ≥ 30 ms       | 2          | QR&(Q ≥ 30 ms)  | 2          | Q ≥ 30 ms      | 2   |
|            | R ≤ 10 ms       |            | R ≤ 10 ms     |            | R ≤ 10 ms       |            | NtchInit40      |            | R ≤ 10 ms      |     |
|            | Q ≥ 20 ms       | 1          | Q ≥ 20 ms     | 1          | Q ≥ 20 ms       | 1          | any QR          | 1          | Q ≥ 20 ms      | 1   |
| V4         | R ≤ 20 ms       |            | R ≤ 20 ms     |            | R ≤ 20 ms       |            | (or any Q if *) |            | R ≤ 20 ms      |     |
|            | Q ≥ 20 ms       | 1          | Q ≥ 20 ms     | 1          | Q ≥ 20 ms       | 1          | Q ≥ 20 ms       | 1          | Q ≥ 20 ms      | 1   |
|            | R/Q ≤ 0.5       | 2          | R/Q ≤ 0.5     | 2          | R/Q ≤ 0.5       | 2          | R/Q ≤ 0.5       | 2          | R/Q ≤ 0.5      | 2   |
| V5         | R/S ≤ 0.5       |            | R/S ≤ 0.5     |            | R/S ≤ 0.5       |            | R/S ≤ 0.5       |            | R/S ≤ 0.5      |     |
|            | R/Q ≤ 1         | 1          | R/Q ≤ 1       | 1          | R/Q ≤ 1         | 1          | R/Q ≤ 1         | 1          | R/Q ≤ 1        | 1   |
|            | R/S ≤ 1         |            | R/S ≤ 1       |            | R/S ≤ 1         |            | R/S ≤ 1         |            | R/S ≤ 1        |     |
| V6         | R ≤ 0.5 mV      |            | R ≤ 0.5 mV    |            | R ≤ 0.5 mV      |            | R ≤ 0.5 mV      |            | R ≤ 0.5 mV     |     |
|            | NtchInit40      |            | NtchInit40    |            | NtchInit40      |            | NtchInit40      |            | NtchInit40     |     |
|            | Q ≥ 30 ms       | 1          | Q ≥ 30 ms     | 1          | Q ≥ 30 ms       | 1          | Q ≥ 30 ms       | 1          | Q ≥ 30 ms      | 1   |
| Total      | R/Q ≤ 1         | 2          | R/Q ≤ 1       | 2          | R/Q ≤ 1         | 2          | R/Q ≤ 1         | 2          | R/Q ≤ 1        | 2   |
|            | R/S ≤ 1         |            | R/S ≤ 1       |            | R/S ≤ 1         |            | R/S ≤ 1         |            | R/S ≤ 1        |     |
|            | R/Q ≤ 2         | 1          | R/Q ≤ 2       | 1          | R/Q ≤ 2         | 1          | R/Q ≤ 2         | 1          | R/Q ≤ 2        | 1   |
| V5         | R/S ≤ 2         |            | R/S ≤ 15      |            | R/S ≤ 2         |            | R/S ≤ 2         |            | R/S ≤ 2        |     |
|            | R ≤ 0.6 mV      |            | R ≤ 0.6 mV    |            | R ≤ 0.6 mV      |            | R ≤ 0.6 mV      |            | R ≤ 0.6 mV     |     |
|            | NtchInit40      |            | NtchInit40    |            | NtchInit40      |            | NtchInit40      |            | NtchInit40     |     |
| V6         | Q ≥ 30 ms       | 1          | Q ≥ 30 ms     | 1          | Q ≥ 30 ms       | 1          | Q ≥ 30 ms       | 1          | Q ≥ 30 ms      | 1   |
|            | R/Q ≤ 1         | 2          | R/Q ≤ 1       | 2          | R/Q ≤ 1         | 2          | R/Q ≤ 1         | 2          | R/Q ≤ 1        | 2   |
|            | R/S ≤ 1         |            | R/S ≤ 1       |            | R/S ≤ 1         |            | R/S ≤ 1         |            | R/S ≤ 1        |     |
| Total      | R/Q ≤ 3         | 1          | R/Q ≤ 3       | 1          | R/Q ≤ 3         | 1          | R/Q ≤ 3         | 1          | R/Q ≤ 3        | 1   |
|            | R/S ≤ 3         |            | R/S ≤ 2       |            | R/S ≤ 3         |            | R/S ≤ 3         |            | R/S ≤ 3        |     |
|            | R ≤ 0.6 mV      |            | R ≤ 0.6 mV    |            | R ≤ 0.6 mV      |            | R ≤ 0.6 mV      |            | R ≤ 0.6 mV     |     |
| NtchInit40 |                 | NtchInit40 |               | NtchInit40 |                 | NtchInit40 |                 | NtchInit40 |                |     |
| Total      | Points          |            | Points        |            | Points          |            | Points          |            | Points         |     |

| LBBB    |            |     |
|---------|------------|-----|
| Lead    | Criteria   | Pts |
| I       | any Q      | 1   |
|         | R/Q ≤ 1    | 2   |
|         | R/S ≤ 1    |     |
| II      | R/Q ≤ 15   | 1   |
|         | R/S ≤ 15   |     |
|         | Q ≥ 40 ms  | 2   |
| aVL     | Q ≥ 30 ms  | 1   |
|         | R/Q ≤ 0.5  | 1   |
|         | R/S ≤ 0.5  |     |
| aVF     | Q ≥ 50 ms  | 2   |
|         | Q ≥ 40 ms  | 1   |
|         | R/Q ≤ 0.5  | 1   |
| V1      | R/S ≤ 0.5  | 2   |
|         | R/Q ≤ 0.5  |     |
|         | R/S ≤ 1    | 1   |
| Ant.*** | NtchInit40 | 1   |
|         | R ≥ 0.3 mV | 2   |
|         | R ≥ 30 ms  |     |
| V1      | R ≥ 0.2 mV | 1   |
|         | R ≥ 20 ms  |     |
|         | S/S' ≥ 2.0 | 3   |
| Post    | S/S' ≥ 1.5 | 2   |
|         | S/S' ≥ 125 | 1   |
|         | NtchInit40 | 1   |
| Ant.**  | R ≥ 0.4 mV | 2   |
|         | R ≥ 30 ms  |     |
|         | R ≥ 0.3 mV | 1   |
| V2      | R ≥ 20 ms  |     |
|         | S/S' ≥ 2.5 | 3   |
|         | S/S' ≥ 2.0 | 2   |
| Post    | S/S' ≥ 1.5 | 1   |
|         | any Q      | 1   |
|         | R/R' ≥ 2   | 2   |
| V5      | R/R' ≥ 1   | 1   |
|         | R/S ≤ 2    |     |
|         | R ≤ 0.5 mV | 1   |
| V6      | Q ≥ 20 ms  | 1   |
|         | R/R' ≥ 2   | 2   |
|         | R/R' ≥ 1   | 1   |
| Total   | R/S ≤ 2    |     |
|         | R ≤ 0.6 mV | 1   |
|         | Points     | 8   |

%LV infarct 24  
(3 \* #pts)

%LV infarct (3 x #pts) \_\_\_\_\_ %LV infarct (3 x #pts) \_\_\_\_\_

\*(for LVH) if ≥4 other points in leads I, aVL, V4, V5 or V6 then count QS in V1-V3  
 \*\* (RAO) if P positive amp in V1 ≥ 0.1mV or aVF P ≥ 0.175 mV, then exclude V1-V2 R-criteria points  
 \*\*\* (RAO) if P positive amp in V1 ≥ 0.1mV or aVF P ≥ 0.175 mV, then exclude V1-V2 R-criteria points



|                         |         |                               |       |                              |                |
|-------------------------|---------|-------------------------------|-------|------------------------------|----------------|
| <b>Patient ID:</b>      | 25      | <b>QRS Duration:</b>          | 110ms | <b>Amplitude Adjustment:</b> | -12%           |
| <b>Age &amp; Sex:</b>   | 67 Male | <b>QRS Axis:</b>              | +66°  | <b>Duration Adjustment:</b>  | 0%             |
| <b>Conduction Type:</b> | LVH     | <b>Right Atrial Overload:</b> | No    | <b>Total Points</b>          | 6 points (18%) |

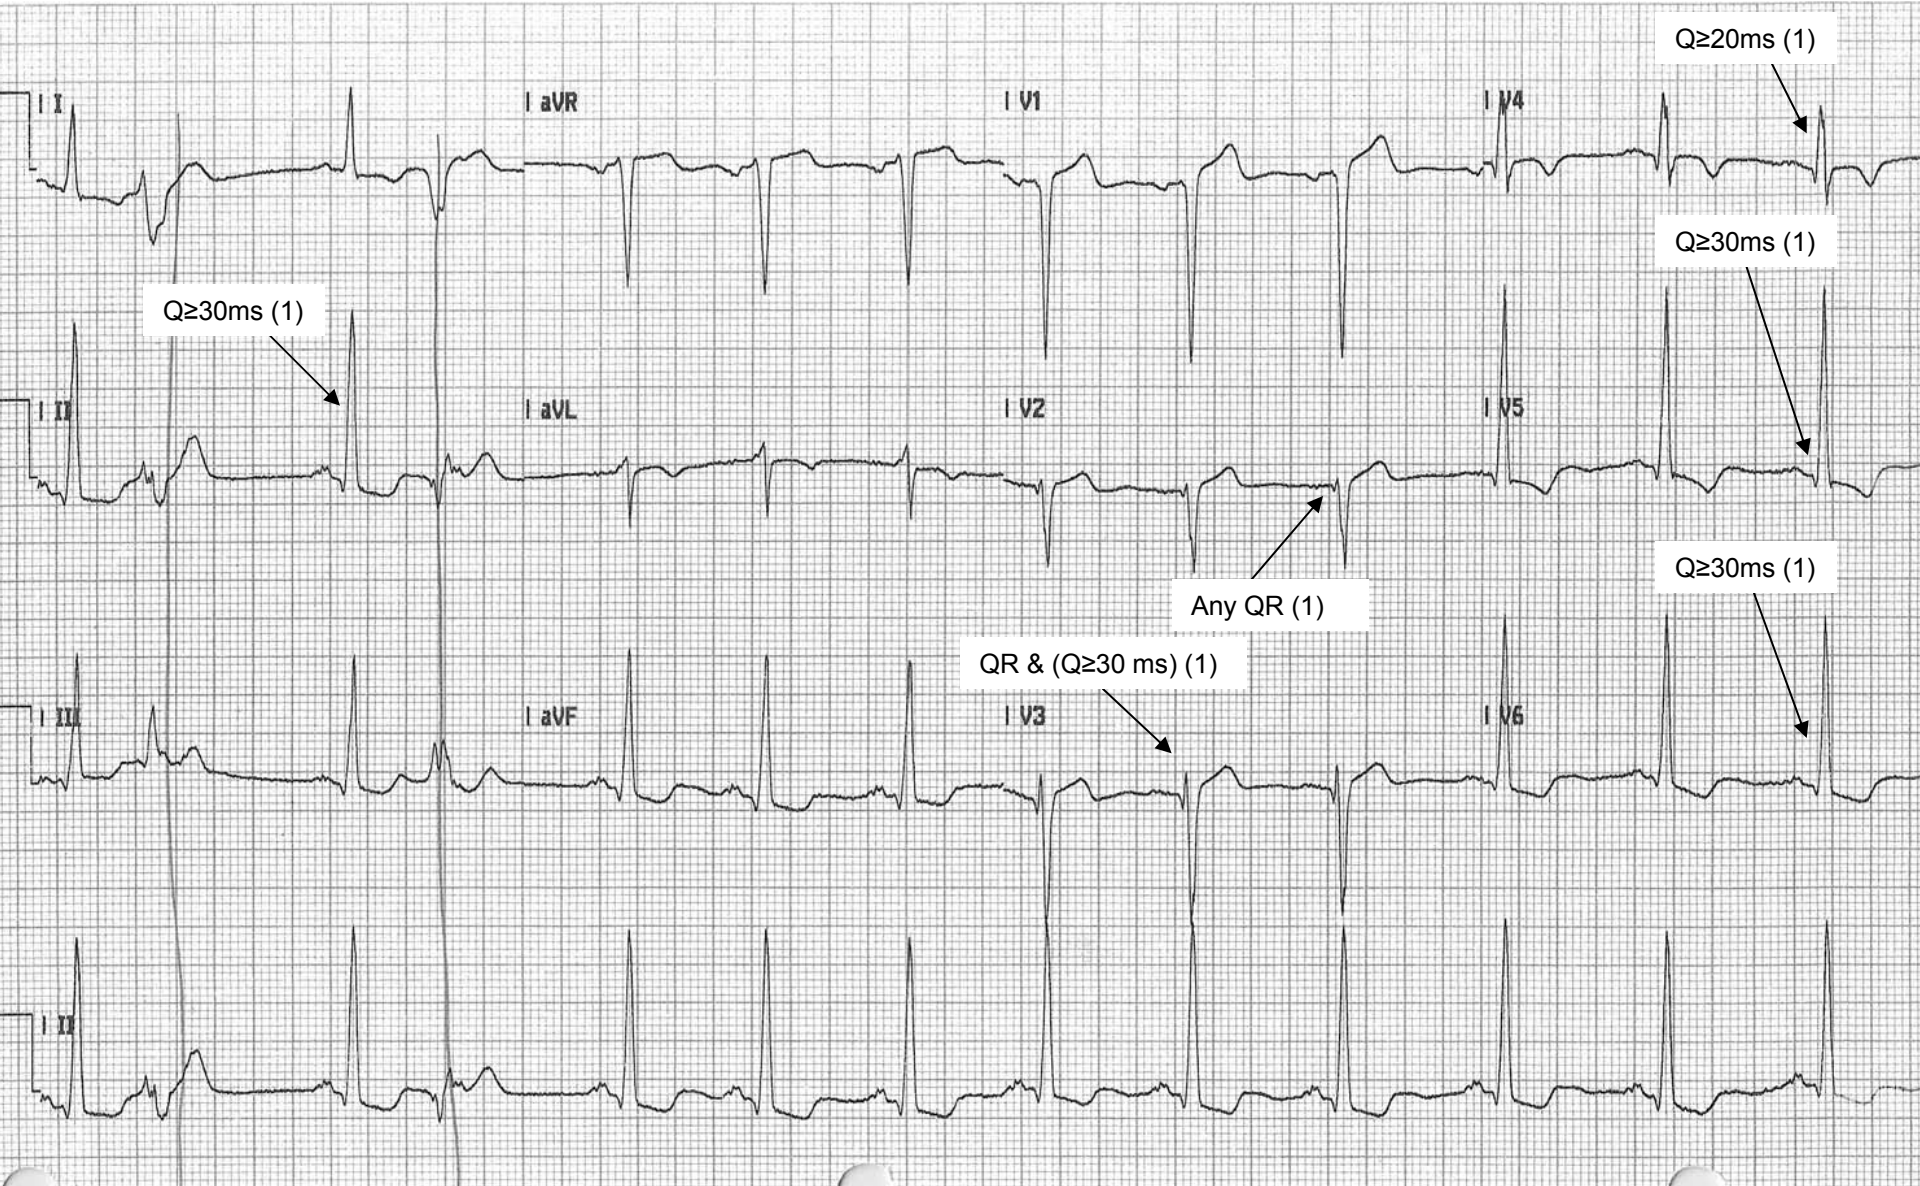

QRS Scoring

Patient ID 25 QRS duration 110ms Amplitude adjust -12%  
 (↑1%/yr age 20-54; ↓1%/yr >55 yrs; ↓ 10% for females)

Age & gender 67 Male QRS axis +66° Duration adjust 0% RAO(\*\*, \*\*\*)Yes(No)  
 (↓ 10% for females)

| Lead         | RBBB                                                                                  |     | LAFB                                                                                  |     | LAFB + RBBB                                                                           |     | LVH                                                                                   |     | No Confounders                                                                        |     |
|--------------|---------------------------------------------------------------------------------------|-----|---------------------------------------------------------------------------------------|-----|---------------------------------------------------------------------------------------|-----|---------------------------------------------------------------------------------------|-----|---------------------------------------------------------------------------------------|-----|
|              | Criteria                                                                              | Pts |
| I            | Q ≥ 30 ms<br>R/Q ≤ 1<br>R ≤ 0.2 mV                                                    | 1   | Q ≥ 30 ms<br>R/Q ≤ 1<br>R ≤ 0.2 mV                                                    | 1   | Q ≥ 30 ms<br>R/Q ≤ 1<br>R ≤ 0.2 mV                                                    | 1   | Q ≥ 30 ms<br>R/Q ≤ 1<br>R ≤ 0.2 mV                                                    | 1   | Q ≥ 30 ms<br>R/Q ≤ 1<br>R ≤ 0.2 mV                                                    | 1   |
| II           | Q ≥ 40 ms<br>Q ≥ 30 ms                                                                | 2   | Q ≥ 40 ms<br>Q ≥ 30 ms                                                                | 2   | Q ≥ 40 ms<br>Q ≥ 30 ms                                                                | 2   | Q ≥ 40 ms<br>Q ≥ 30 ms                                                                | 2   | Q ≥ 40 ms<br>Q ≥ 30 ms                                                                | 2   |
| aVL          | Q ≥ 30 ms<br>R/Q ≤ 1                                                                  | 1   | Q ≥ 40 ms<br>R/Q ≤ 1                                                                  | 1   | Q ≥ 40 ms<br>R/Q ≤ 1                                                                  | 1   | Q ≥ 40 ms<br>R/Q ≤ 1                                                                  | 1   | Q ≥ 30 ms<br>R/Q ≤ 1                                                                  | 1   |
| aVF          | Q ≥ 50 ms<br>Q ≥ 40 ms<br>Q ≥ 30 ms<br>R/Q ≤ 1<br>R/Q ≤ 2                             | 3   | Q ≥ 50 ms<br>Q ≥ 40 ms<br>Q ≥ 30 ms<br>R/Q ≤ 1<br>R/Q ≤ 2                             | 3   | Q ≥ 50 ms<br>Q ≥ 40 ms<br>Q ≥ 30 ms<br>R/Q ≤ 1<br>R/Q ≤ 2                             | 3   | Q ≥ 60 ms<br>Q ≥ 50 ms<br>Q ≥ 40 ms<br>R/Q ≤ 1<br>R/Q ≤ 2                             | 3   | Q ≥ 50 ms<br>Q ≥ 40 ms<br>Q ≥ 30 ms<br>R/Q ≤ 1<br>R/Q ≤ 2                             | 3   |
| V1           | Q ≥ 50 ms<br>any Q<br>Init R ≤ 2.0 ms                                                 | 2   |                                                                                       |     | Q ≥ 50 ms<br>any QR<br>any Q<br>Init R ≥ 2.0 ms                                       | 2   | any QR<br>(or any Q if *)<br>NtchInit40                                               | 1   | any Q                                                                                 | 1   |
| V1 Post.**   | Init R ≥ 60 ms<br>Init R ≥ 15 mV<br>Init R ≥ 50 ms<br>Init R ≥ 10 mV                  | 2   | R ≥ 50 ms<br>R ≥ 1mV<br>R ≥ 40 ms<br>R ≥ 0.7 mV                                       | 2   | Init R ≥ 60 ms<br>Init R ≥ 15 mV<br>Init R ≥ 50 ms<br>Init R ≥ 10 mV                  | 2   | R ≥ 50 ms<br>R ≥ 1mV<br>R ≥ 40 ms<br>R ≥ 0.7 mV                                       | 2   | R ≥ 50 ms<br>R ≥ 1mV<br>R ≥ 40 ms<br>R ≥ 0.7 mV                                       | 2   |
| V2           | Q ≥ 50 ms<br>any Q<br>R ≤ 10 ms<br>R ≤ 0.1mV                                          | 2   | any QR<br>R ≤ 10 ms<br>R ≤ 0.1mV                                                      | 1   | Q ≥ 50 ms<br>any Q<br>R ≤ 10 ms<br>R ≤ 0.1mV                                          | 2   | any QR<br>(or any Q if *)<br>NtchInit40                                               | 1   | any Q<br>R ≤ 10 ms<br>R ≤ 0.1mV                                                       | 1   |
| V2 Post.**   | Init R ≥ 70 ms<br>Init R ≥ 2.5 mV<br>Init R ≥ 50 ms<br>Init R ≥ 2.0 mV                | 2   | R ≥ 60 ms<br>R ≥ 2 mV<br>R ≥ 50 ms<br>R ≥ 15 mV                                       | 2   | Init R ≥ 70 ms<br>Init R ≥ 2.5 mV<br>Init R ≥ 50 ms<br>Init R ≥ 2.0 mV                | 2   | R ≥ 60 ms<br>R ≥ 2 mV<br>R ≥ 50 ms<br>R ≥ 15 mV                                       | 2   | R ≥ 60 ms<br>R ≥ 2 mV<br>R ≥ 50 ms<br>R ≥ 15 mV                                       | 2   |
| V3           | Q ≥ 30 ms<br>R ≤ 10 ms<br>Q ≥ 20 ms<br>R ≤ 20 ms                                      | 2   | Q ≥ 30 ms<br>R ≤ 10 ms<br>Q ≥ 20 ms<br>R ≤ 20 ms                                      | 2   | Q ≥ 30 ms<br>R ≤ 10 ms<br>Q ≥ 20 ms<br>R ≤ 20 ms                                      | 2   | QR & (Q ≥ 30 ms)<br>NtchInit40<br>any QR<br>(or any Q if *)                           | 2   | Q ≥ 30 ms<br>R ≤ 10 ms<br>Q ≥ 20 ms<br>R ≤ 20 ms                                      | 2   |
| V4           | Q ≥ 20 ms<br>R/Q ≤ 0.5<br>R/S ≤ 0.5<br>R/Q ≤ 1<br>R/S ≤ 1<br>R ≤ 0.5 mV<br>NtchInit40 | 2   | Q ≥ 20 ms<br>R/Q ≤ 0.5<br>R/S ≤ 0.5<br>R/Q ≤ 1<br>R/S ≤ 1<br>R ≤ 0.5 mV<br>NtchInit40 | 2   | Q ≥ 20 ms<br>R/Q ≤ 0.5<br>R/S ≤ 0.5<br>R/Q ≤ 1<br>R/S ≤ 1<br>R ≤ 0.5 mV<br>NtchInit40 | 2   | Q ≥ 20 ms<br>R/Q ≤ 0.5<br>R/S ≤ 0.5<br>R/Q ≤ 1<br>R/S ≤ 1<br>R ≤ 0.5 mV<br>NtchInit40 | 2   | Q ≥ 20 ms<br>R/Q ≤ 0.5<br>R/S ≤ 0.5<br>R/Q ≤ 1<br>R/S ≤ 1<br>R ≤ 0.5 mV<br>NtchInit40 | 2   |
| V5           | Q ≥ 30 ms<br>R/Q ≤ 1<br>R/S ≤ 1<br>R/Q ≤ 2<br>R/S ≤ 2<br>R ≤ 0.6 mV<br>NtchInit40     | 1   | Q ≥ 30 ms<br>R/Q ≤ 1<br>R/S ≤ 1<br>R/Q ≤ 2<br>R/S ≤ 15<br>R ≤ 0.6 mV<br>NtchInit40    | 1   | Q ≥ 30 ms<br>R/Q ≤ 1<br>R/S ≤ 1<br>R/Q ≤ 2<br>R/S ≤ 15<br>R ≤ 0.6 mV<br>NtchInit40    | 1   | Q ≥ 30 ms<br>R/Q ≤ 1<br>R/S ≤ 1<br>R/Q ≤ 2<br>R/S ≤ 2<br>R ≤ 0.6 mV<br>NtchInit40     | 1   | Q ≥ 30 ms<br>R/Q ≤ 1<br>R/S ≤ 1<br>R/Q ≤ 2<br>R/S ≤ 2<br>R ≤ 0.6 mV<br>NtchInit40     | 1   |
| V6           | Q ≥ 30 ms<br>R/Q ≤ 1<br>R/S ≤ 1<br>R/Q ≤ 3<br>R/S ≤ 3<br>R ≤ 0.6 mV<br>NtchInit40     | 1   | Q ≥ 30 ms<br>R/Q ≤ 1<br>R/S ≤ 1<br>R/Q ≤ 3<br>R/S ≤ 2<br>R ≤ 0.6 mV<br>NtchInit40     | 1   | Q ≥ 30 ms<br>R/Q ≤ 1<br>R/S ≤ 1<br>R/Q ≤ 3<br>R/S ≤ 2<br>R ≤ 0.6 mV<br>NtchInit40     | 1   | Q ≥ 30 ms<br>R/Q ≤ 1<br>R/S ≤ 1<br>R/Q ≤ 3<br>R/S ≤ 3<br>R ≤ 0.6 mV<br>NtchInit40     | 1   | Q ≥ 30 ms<br>R/Q ≤ 1<br>R/S ≤ 1<br>R/Q ≤ 3<br>R/S ≤ 3<br>R ≤ 0.6 mV<br>NtchInit40     | 1   |
| <b>Total</b> | Points                                                                                |     | Points                                                                                |     | Points                                                                                |     | Points <b>6</b>                                                                       |     | Points                                                                                |     |

| Lead         | LBBB                                                   |     |
|--------------|--------------------------------------------------------|-----|
|              | Criteria                                               | Pts |
| I            | any Q<br>R/Q ≤ 1<br>R/S ≤ 1                            | 2   |
| II           | R/Q ≤ 15<br>R/S ≤ 15                                   | 1   |
| aVL          | Q ≥ 40 ms<br>Q ≥ 30 ms                                 | 2   |
| aVF          | R/Q ≤ 0.5<br>R/S ≤ 0.5                                 | 1   |
| V1           | Q ≥ 50 ms<br>Q ≥ 40 ms<br>R/Q ≤ 0.5<br>R/S ≤ 0.5       | 2   |
| V1 Ant.***   | NtchInit40                                             | 1   |
| V1 Post      | R ≥ 0.3 mV<br>R ≥ 30 ms<br>R ≥ 0.2 mV<br>R ≥ 20 ms     | 2   |
| V2           | S/S' ≥ 2.0<br>S/S' ≥ 15                                | 3   |
| V2 Ant.***   | NtchInit40                                             | 1   |
| V2 Post      | R ≥ 0.4 mV<br>R ≥ 30 ms<br>R ≥ 0.3 mV<br>R ≥ 20 ms     | 2   |
| V5           | S/S' ≥ 2.5<br>S/S' ≥ 2.0<br>S/S' ≥ 15                  | 3   |
| V6           | any Q<br>R/R' ≥ 2<br>R/R' ≥ 1<br>R/S ≤ 2<br>R ≤ 0.5 mV | 1   |
| <b>Total</b> | Points                                                 |     |

%LV infarct       
 (3 #pts)

%LV infarct      %LV infarct      %LV infarct      %LV infarct 18 %LV infarct       
 (3 x #pts) (3 x #pts) (3 x #pts) (3 x #pts) (3 x #pts)

\*(for LVH) if ≥4 other points in leads I, aVL, V4, V5 or V6 then count QS in V1-V3  
 \*\* (RAO) if P positive amp in V1 ≥ 0.1mV or aVF P ≥ 0.175 mV, then exclude V1-V2 R-criteria points  
 \*\*\* (RAO) if P positive amp in V1 ≥ 0.1mV or aVF P ≥ 0.175 mV, then exclude V1-V2 R-criteria points

|                         |         |                               |       |                              |                |
|-------------------------|---------|-------------------------------|-------|------------------------------|----------------|
| <b>Patient ID:</b>      | 26      | <b>QRS Duration:</b>          | 128ms | <b>Amplitude Adjustment:</b> | -7%            |
| <b>Age &amp; Sex:</b>   | 62 Male | <b>QRS Axis:</b>              | +121° | <b>Duration Adjustment:</b>  | 0%             |
| <b>Conduction Type:</b> | RBBB    | <b>Right Atrial Overload:</b> | No    | <b>Total Points</b>          | 4 points (12%) |

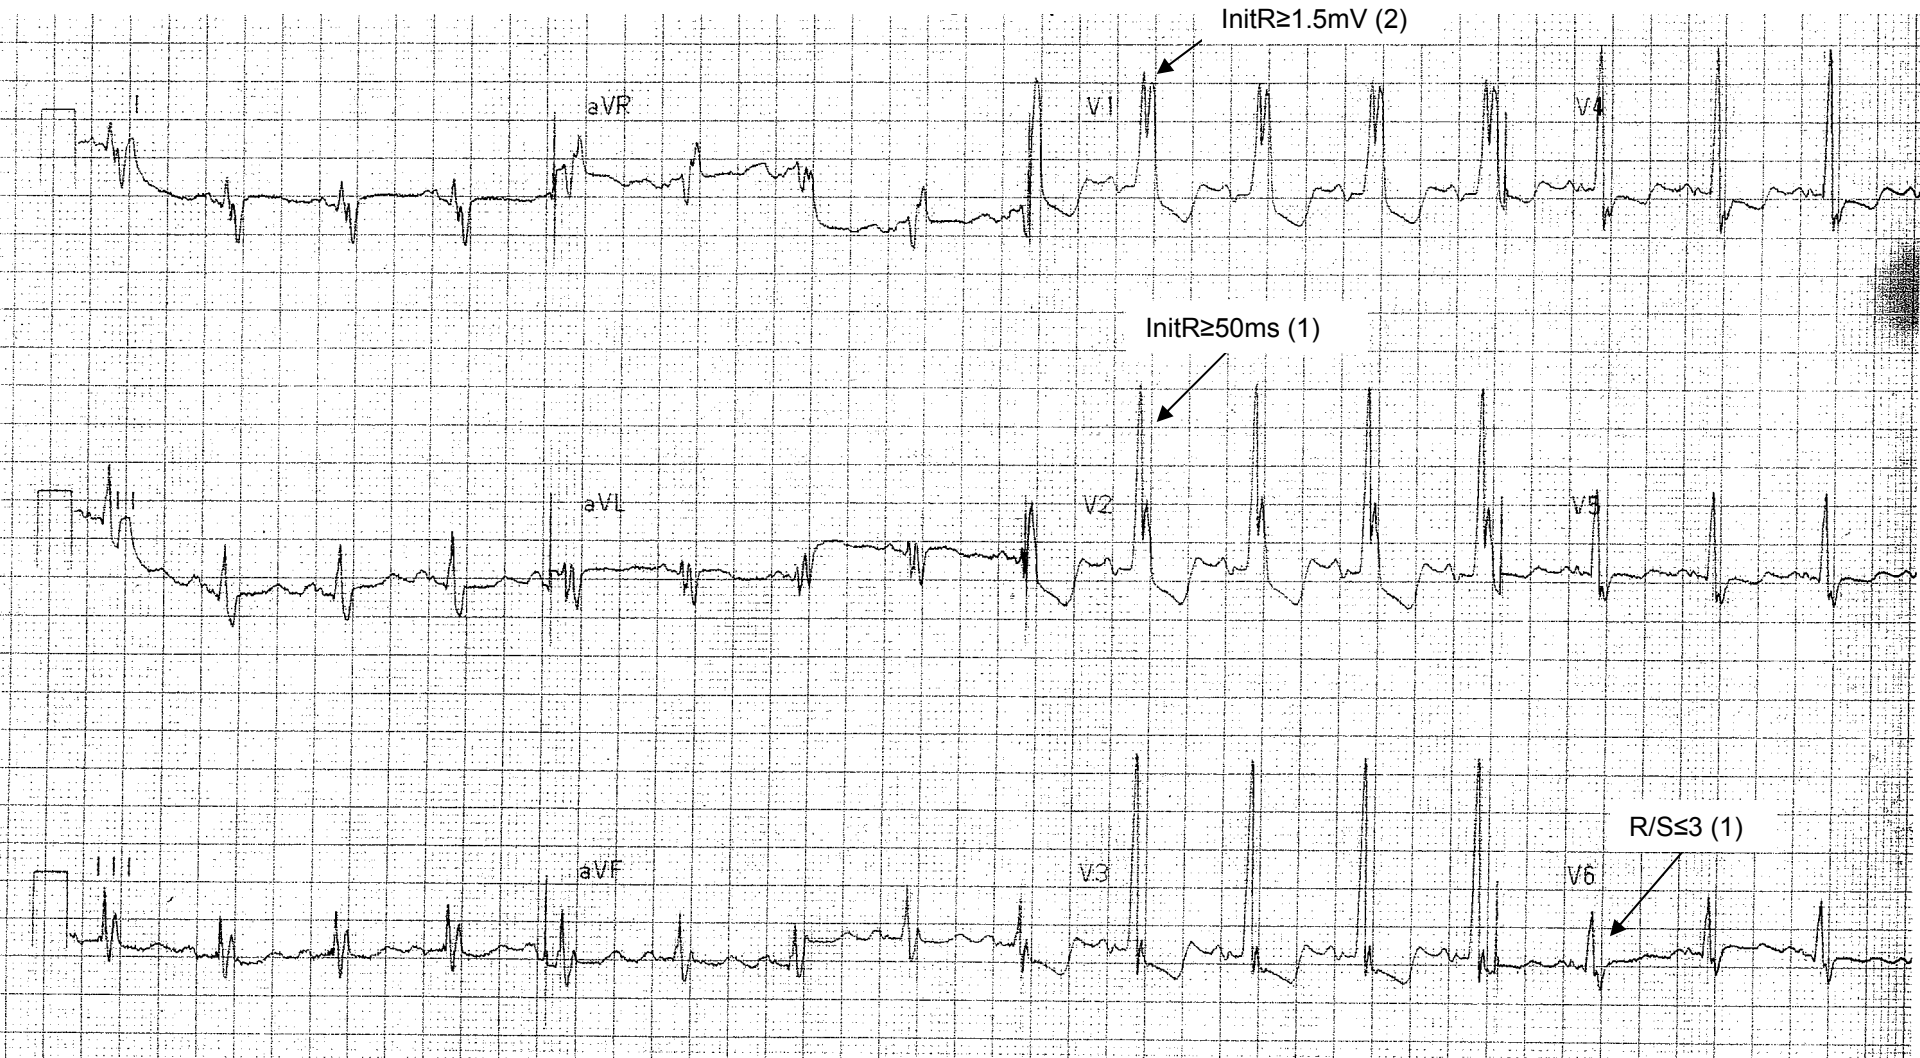

QRS Scoring

Patient ID 26 QRS duration 128ms Amplitude adjust -7%  
 (11%/yr age 20-54; ↓1%/yr >55 yrs; ↓ 10% for females)  
 Age & gender 62 Male QRS axis +121° Duration adjust 0% RAO(\*\*, \*\*\*)Yes/No  
 (↓ 10% for females)

| Lead         | RBBB            |          | LAFB          |     | LAFB + RBBB     |     | LVH              |     | No Confounders |     |
|--------------|-----------------|----------|---------------|-----|-----------------|-----|------------------|-----|----------------|-----|
|              | Criteria        | Pts      | Criteria      | Pts | Criteria        | Pts | Criteria         | Pts | Criteria       | Pts |
| I            | Q ≥ 30 ms       | 1        | Q ≥ 30 ms     | 1   | Q ≥ 30 ms       | 1   | Q ≥ 30 ms        | 1   | Q ≥ 30 ms      | 1   |
|              | R/Q ≤ 1         | 1        | R/Q ≤ 1       | 1   | R/Q ≤ 1         | 1   | R/Q ≤ 1          | 1   | R/Q ≤ 1        | 1   |
|              | R ≤ 0.2 mV      |          | R ≤ 0.2 mV    |     | R ≤ 0.2 mV      |     | R ≤ 0.2 mV       |     | R ≤ 0.2 mV     |     |
| II           | Q ≥ 40 ms       | 2        | Q ≥ 40 ms     | 2   | Q ≥ 40 ms       | 2   | Q ≥ 40 ms        | 2   | Q ≥ 40 ms      | 2   |
|              | Q ≥ 30 ms       | 1        | Q ≥ 30 ms     | 1   | Q ≥ 30 ms       | 1   | Q ≥ 30 ms        | 1   | Q ≥ 30 ms      | 1   |
|              | R/Q ≤ 1         | 1        | R/Q ≤ 1       | 1   | R/Q ≤ 1         | 1   | R/Q ≤ 1          | 1   | R/Q ≤ 1        | 1   |
| aVL          | Q ≥ 30 ms       | 1        | Q ≥ 40 ms     | 1   | Q ≥ 40 ms       | 1   | Q ≥ 40 ms        | 1   | Q ≥ 30 ms      | 1   |
|              | R/Q ≤ 1         | 1        | R/Q ≤ 1       | 1   | R/Q ≤ 1         | 1   | R/Q ≤ 1          | 1   | R/Q ≤ 1        | 1   |
|              | Q ≥ 50 ms       | 3        | Q ≥ 50 ms     | 3   | Q ≥ 50 ms       | 3   | Q ≥ 60 ms        | 3   | Q ≥ 50 ms      | 3   |
| aVF          | Q ≥ 40 ms       | 2        | Q ≥ 40 ms     | 2   | Q ≥ 40 ms       | 2   | Q ≥ 50 ms        | 2   | Q ≥ 40 ms      | 2   |
|              | Q ≥ 30 ms       | 1        | Q ≥ 30 ms     | 1   | Q ≥ 30 ms       | 1   | Q ≥ 40 ms        | 1   | Q ≥ 30 ms      | 1   |
|              | R/Q ≤ 1         | 2        | R/Q ≤ 1       | 2   | R/Q ≤ 1         | 2   | R/Q ≤ 1          | 2   | R/Q ≤ 1        | 2   |
| V1           | Q ≥ 50 ms       | 2        | Q ≥ 50 ms     | 2   | Q ≥ 50 ms       | 2   | any QR           | 1   | any QR         | 1   |
|              | any Q           | 1        | any QR        | 1   | any Q           | 1   | (or any Q if *)  | 1   | any Q          | 1   |
|              | Init R ≤ 20 ms  |          |               |     |                 |     | NtchInit40       |     |                |     |
| Post.**      | Init R ≥ 60 ms  | 2        | R ≥ 50 ms     | 2   | Init R ≥ 60 ms  | 2   | R ≥ 50 ms        | 2   | R ≥ 50 ms      | 2   |
|              | Init R ≥ 15 mV  |          | R ≥ 1mV       |     | Init R ≥ 15 mV  |     | R ≥ 1mV          |     | R ≥ 1mV        |     |
|              | Init R ≥ 50 ms  | 1        | R ≥ 40 ms     | 1   | Init R ≥ 50 ms  | 1   | R ≥ 40 ms        | 1   | R ≥ 40 ms      | 1   |
| V2           | Q ≥ 50 ms       | 2        | any QR        | 1   | Q ≥ 50 ms       | 2   | any QR           | 1   | any Q          | 1   |
|              | any Q           | 1        | R ≤ 10 ms     | 1   | any Q           | 1   | (or any Q if *)  | 1   | R ≤ 10 ms      | 1   |
|              | R ≤ 10 ms       | 1        | R ≤ 0.1mV     | 1   | R ≤ 10 ms       | 1   | NtchInit40       | 1   | R ≤ 0.1mV      | 1   |
| Post.**      | Init R ≥ 70 ms  | 2        | R/S ≥ 15      | 1   | Init R ≥ 70 ms  | 2   | R/S ≥ 15         | 1   | R/S ≥ 15       | 1   |
|              | Init R ≥ 2.5 mV |          | R ≥ 2 mV      |     | Init R ≥ 2.5 mV |     | R ≥ 2 mV         |     | R ≥ 2 mV       |     |
|              | Init R ≥ 50 ms  | 1        | R ≥ 50 ms     | 1   | Init R ≥ 50 ms  | 1   | R ≥ 50 ms        | 1   | R ≥ 50 ms      | 1   |
| V3           | Q ≥ 30 ms       | 2        | Q ≥ 30 ms     | 2   | Q ≥ 30 ms       | 2   | QR & (Q ≥ 30 ms) | 2   | Q ≥ 30 ms      | 2   |
|              | R ≤ 10 ms       | 1        | R ≤ 10 ms     | 1   | R ≤ 10 ms       | 1   | NtchInit40       | 1   | R ≤ 10 ms      | 1   |
|              | Q ≥ 20 ms       | 1        | Q ≥ 20 ms     | 1   | Q ≥ 20 ms       | 1   | any QR           | 1   | Q ≥ 20 ms      | 1   |
| V4           | Q ≥ 20 ms       | 1        | Q ≥ 20 ms     | 1   | Q ≥ 20 ms       | 1   | Q ≥ 20 ms        | 1   | Q ≥ 20 ms      | 1   |
|              | R/Q ≤ 0.5       | 2        | R/Q ≤ 0.5     | 2   | R/Q ≤ 0.5       | 2   | R/Q ≤ 0.5        | 2   | R/Q ≤ 0.5      | 2   |
|              | R/S ≤ 0.5       | 1        | R/S ≤ 0.5     | 1   | R/S ≤ 0.5       | 1   | R/S ≤ 0.5        | 1   | R/S ≤ 0.5      | 1   |
| V5           | Q ≥ 30 ms       | 1        | Q ≥ 30 ms     | 1   | Q ≥ 30 ms       | 1   | Q ≥ 30 ms        | 1   | Q ≥ 30 ms      | 1   |
|              | R/Q ≤ 1         | 2        | R/Q ≤ 1       | 2   | R/Q ≤ 1         | 2   | R/Q ≤ 1          | 2   | R/Q ≤ 1        | 2   |
|              | R/S ≤ 1         | 1        | R/S ≤ 1       | 1   | R/S ≤ 1         | 1   | R/S ≤ 1          | 1   | R/S ≤ 1        | 1   |
| V6           | Q ≥ 30 ms       | 1        | Q ≥ 30 ms     | 1   | Q ≥ 30 ms       | 1   | Q ≥ 30 ms        | 1   | Q ≥ 30 ms      | 1   |
|              | R/Q ≤ 1         | 2        | R/Q ≤ 1       | 2   | R/Q ≤ 1         | 2   | R/Q ≤ 1          | 2   | R/Q ≤ 1        | 2   |
|              | R/S ≤ 1         | 1        | R/S ≤ 1       | 1   | R/S ≤ 1         | 1   | R/S ≤ 1          | 1   | R/S ≤ 1        | 1   |
| <b>Total</b> | <b>Points</b>   | <b>4</b> | <b>Points</b> |     | <b>Points</b>   |     | <b>Points</b>    |     | <b>Points</b>  |     |

| Lead         | LBBB          |     |
|--------------|---------------|-----|
|              | Criteria      | Pts |
| I            | any Q         | 1   |
|              | R/Q ≤ 1       | 2   |
|              | R/S ≤ 1       | 1   |
| II           | Q ≥ 40 ms     | 2   |
|              | Q ≥ 30 ms     | 1   |
|              | R/Q ≤ 0.5     | 1   |
| aVL          | Q ≥ 50 ms     | 2   |
|              | Q ≥ 40 ms     | 1   |
|              | R/S ≤ 0.5     | 2   |
| aVF          | Q ≥ 50 ms     | 2   |
|              | Q ≥ 40 ms     | 1   |
|              | R/Q ≤ 0.5     | 1   |
| V1           | NchInit40     | 1   |
|              | R ≥ 0.3 mV    | 2   |
|              | R ≥ 30 ms     | 1   |
| V2           | S/S' ≥ 2.0    | 3   |
|              | S/S' ≥ 1.5    | 2   |
|              | S/S' ≥ 125    | 1   |
| V3           | NchInit40     | 1   |
|              | R ≥ 0.4 mV    | 2   |
|              | R ≥ 30 ms     | 1   |
| V4           | S/S' ≥ 2.5    | 3   |
|              | S/S' ≥ 2.0    | 2   |
|              | S/S' ≥ 1.5    | 1   |
| V5           | any Q         | 1   |
|              | R/R' ≥ 2      | 2   |
|              | R/R' ≥ 1      | 1   |
| V6           | Q ≥ 20 ms     | 1   |
|              | R/R' ≥ 2      | 2   |
|              | R/R' ≥ 1      | 1   |
| <b>Total</b> | <b>Points</b> |     |

%LV infarct       
 (3 #pts)

%LV infarct 12 (3 x #pts)    %LV infarct      (3 x #pts)

\*(for LVH) if ≥4 other points in leads I, aVL, V4, V5 or V6 then count QS in V1-V3  
 \*\* (RAO) if P positive amp in V1 ≥ 0.1mV or aVF P ≥ 0.175 mV, then exclude V1-V2 R-criteria points  
 \*\*\* (RAO) if P positive amp in V1 ≥ 0.1mV or aVF P ≥ 0.175 mV, then exclude V1-V2 R-criteria points
