# Supplementary material
Source: PubMed Central journal article supplement (PMC3164517)
Supplement: NIHMS309339-supplement-ECG_Set_2-_Key_with_QRS_scores.pdf [file NIHMS309339-supplement-ECG_Set_2-_Key_with_QRS_scores.pdf]

QRS Scoring

Patient ID 01 QRS duration 156ms Amplitude adjust +10%  
 (↑1%/yr age 20-54; ↓1%/yr >55 yrs; ↓ 10% for females)  
 Age & gender 45 Male QRS axis -30° Duration adjust 0% RAO(\*\*, \*\*\*)Yes(No)  
 (↓ 10% for females)

| Lead      | RBBB            |     | LAFB       |     | LAFB + RBBB     |     | LVH                    |     | No Confounders |     |
|-----------|-----------------|-----|------------|-----|-----------------|-----|------------------------|-----|----------------|-----|
|           | Criteria        | Pts | Criteria   | Pts | Criteria        | Pts | Criteria               | Pts | Criteria       | Pts |
| I         | Q ≥ 30 ms       | 1   | Q ≥ 30 ms  | 1   | Q ≥ 30 ms       | 1   | Q ≥ 30 ms              | 1   | Q ≥ 30 ms      | 1   |
|           | R/Q ≤ 1         | 1   | R/Q ≤ 1    | 1   | R/Q ≤ 1         | 1   | R/Q ≤ 1                | 1   | R/Q ≤ 1        | 1   |
| II        | R ≤ 0.2 mV      | 1   | R ≤ 0.2 mV | 1   | R ≤ 0.2 mV      | 1   | R ≤ 0.2 mV             | 1   | R ≤ 0.2 mV     | 1   |
|           | Q ≥ 40 ms       | 2   | Q ≥ 40 ms  | 2   | Q ≥ 40 ms       | 2   | Q ≥ 40 ms              | 2   | Q ≥ 40 ms      | 2   |
| aVL       | Q ≥ 30 ms       | 1   | Q ≥ 30 ms  | 1   | Q ≥ 30 ms       | 1   | Q ≥ 30 ms              | 1   | Q ≥ 30 ms      | 1   |
|           | R/Q ≤ 1         | 1   | R/Q ≤ 1    | 1   | R/Q ≤ 1         | 1   | R/Q ≤ 1                | 1   | R/Q ≤ 1        | 1   |
| aVF       | Q ≥ 50 ms       | 3   | Q ≥ 50 ms  | 3   | Q ≥ 50 ms       | 3   | Q ≥ 60 ms              | 3   | Q ≥ 50 ms      | 3   |
|           | Q ≥ 40 ms       | 2   | Q ≥ 40 ms  | 2   | Q ≥ 40 ms       | 2   | Q ≥ 50 ms              | 2   | Q ≥ 40 ms      | 2   |
| V1        | Q ≥ 30 ms       | 1   | Q ≥ 30 ms  | 1   | Q ≥ 30 ms       | 1   | Q ≥ 40 ms              | 1   | Q ≥ 30 ms      | 1   |
|           | R/Q ≤ 1         | 1   | R/Q ≤ 1    | 1   | R/Q ≤ 1         | 1   | R/Q ≤ 1                | 1   | R/Q ≤ 1        | 1   |
| Ant.      | any Q           | 1   | any QR     | 1   | any Q           | 1   | any QR (or any Q if *) | 1   | any Q          | 1   |
|           | Init R ≤ 20 ms  | 1   |            |     |                 |     | Ntchlnit40             |     |                |     |
| V1 Post.* | Init R ≥ 60 ms  | 2   | R ≥ 50 ms  | 2   | Init R ≥ 60 ms  | 2   | R ≥ 50 ms              | 2   | R ≥ 50 ms      | 2   |
|           | Init R ≥ 15 mV  | 1   | R ≥ 1 mV   | 1   | Init R ≥ 15 mV  | 1   | R ≥ 1 mV               | 1   | R ≥ 1 mV       | 1   |
| V2        | Init R ≥ 50 ms  | 1   | R ≥ 40 ms  | 1   | Init R ≥ 50 ms  | 1   | R ≥ 40 ms              | 1   | R ≥ 40 ms      | 1   |
|           | Init R ≥ 10 mV  | 1   | R ≥ 0.7 mV | 1   | Init R ≥ 10 mV  | 1   | R ≥ 0.7 mV             | 1   | R ≥ 0.7 mV     | 1   |
| Ant.***   | Q ≥ 50 ms       | 2   | any QR     | 1   | any Q           | 1   | any QR (or any Q if *) | 1   | any Q          | 1   |
|           | any Q           | 1   | R ≤ 10 ms  | 1   | any Q           | 1   | R ≤ 10 ms              | 1   | R ≤ 10 ms      | 1   |
| V2 Post.* | R ≤ 10 mV       | 1   | R ≤ 0.1 mV | 1   | R ≤ 0.1 mV      | 1   | Ntchlnit40             | 1   | R ≤ 0.1 mV     | 1   |
|           | Init R ≥ 70 ms  | 2   | R ≥ 60 ms  | 2   | Init R ≥ 70 ms  | 2   | R ≥ 60 ms              | 2   | R ≥ 60 ms      | 2   |
| V3        | Init R ≥ 2.5 mV | 1   | R ≥ 2 mV   | 1   | Init R ≥ 2.5 mV | 1   | R ≥ 2 mV               | 1   | R ≥ 2 mV       | 1   |
|           | Init R ≥ 2.0 mV | 1   | R ≥ 1.5 mV | 1   | Init R ≥ 2.0 mV | 1   | R ≥ 1.5 mV             | 1   | R ≥ 1.5 mV     | 1   |
| V4        | Q ≥ 30 ms       | 2   | Q ≥ 30 ms  | 2   | Q ≥ 30 ms       | 2   | Q ≥ 30 ms              | 2   | Q ≥ 30 ms      | 2   |
|           | R ≤ 10 ms       | 1   | R ≤ 10 ms  | 1   | R ≤ 10 ms       | 1   | R ≤ 10 ms              | 1   | R ≤ 10 ms      | 1   |
| V5        | Q ≥ 20 ms       | 1   | Q ≥ 20 ms  | 1   | Q ≥ 20 ms       | 1   | Q ≥ 20 ms              | 1   | Q ≥ 20 ms      | 1   |
|           | R/Q ≤ 0.5       | 2   | R/Q ≤ 0.5  | 2   | R/Q ≤ 0.5       | 2   | R/Q ≤ 0.5              | 2   | R/Q ≤ 0.5      | 2   |
| V6        | R/S ≤ 1         | 1   | R/S ≤ 1    | 1   | R/S ≤ 1         | 1   | R/S ≤ 1                | 1   | R/S ≤ 1        | 1   |
|           | R ≤ 0.5 mV      | 1   | R ≤ 0.5 mV | 1   | R ≤ 0.5 mV      | 1   | R ≤ 0.5 mV             | 1   | R ≤ 0.5 mV     | 1   |
| Total     | Points          |     | Points     |     | Points          |     | Points                 |     | Points         | 4   |

| Lead      | Criteria    | Pts |
|-----------|-------------|-----|
| I         | any Q       | 1   |
|           | R/Q ≤ 1     | 2   |
| II        | R/S ≤ 1     | 1   |
|           | R/Q ≤ 15    | 1   |
| aVL       | R/S ≤ 15    | 1   |
|           | Q ≥ 40 ms   | 2   |
| aVF       | Q ≥ 30 ms   | 1   |
|           | R/Q ≤ 0.5   | 1   |
| V1        | Q ≥ 50 ms   | 2   |
|           | R/S ≤ 0.5   | 2   |
| Ant.***   | R/Q ≤ 0.5   | 1   |
|           | R/S ≤ 1     | 1   |
| V1 Post.* | R/Q ≤ 1     | 1   |
|           | Ntchlnit40  | 1   |
| V2        | Q ≥ 50 ms   | 2   |
|           | Q ≥ 40 ms   | 1   |
| Ant.***   | R/Q ≤ 0.5   | 1   |
|           | R/S ≤ 0.5   | 1   |
| V2 Post.* | Ntchlnit40  | 1   |
|           | R ≥ 0.3 mV  | 2   |
| V3        | R ≥ 30 ms   | 1   |
|           | R ≥ 0.2 mV  | 1   |
| V4        | R ≥ 20 ms   | 1   |
|           | R ≥ 0.2 mV  | 1   |
| V5        | S/S' ≥ 2.0  | 3   |
|           | S/S' ≥ 1.5  | 2   |
| V6        | S/S' ≥ 1.25 | 1   |
|           | Ntchlnit40  | 1   |
| Ant.***   | R ≥ 0.4 mV  | 2   |
|           | R ≥ 30 ms   | 1   |
| V2 Post.* | R ≥ 0.3 mV  | 1   |
|           | R ≥ 20 ms   | 1   |
| V5        | S/S' ≥ 2.5  | 3   |
|           | S/S' ≥ 2.0  | 2   |
| V6        | S/S' ≥ 1.5  | 1   |
|           | any Q       | 1   |
| Total     | Points      |     |

%LV infarct (3 #pts) \_\_\_\_\_

%LV infarct (3 x#pts) \_\_\_\_\_ %LV infarct (3 x#pts) \_\_\_\_\_ %LV infarct (3 x#pts) \_\_\_\_\_ %LV infarct (3 x#pts) \_\_\_\_\_ %LV infarct (3 x#pts) \_\_\_\_\_ 12

\* (for LVH) if ≥ 4 other points in leads I, aVL, V4, V5 or V6 then count QS in V1+V3

\*\* (RAO) if P positive amp in V1 ≥ 0.1 mV or aVF P ≥ 0.175 mV, then exclude V1+V2 Post criteria

\*\*\* (RAO) if P positive amp in V1 ≥ 0.1 mV or aVF P ≥ 0.175 mV, then exclude V1+V2 R-criteria points

QRS Scoring

Patient ID 02 QRS duration 82ms Amplitude adjust -22%  
 (↑1%/yr age 20-54; ↓1%/yr >55 yrs; ↓ 10% for females)  
 Age & gender 67 Female QRS axis -9° Duration adjust -10% RAO(\*\*, \*\*\*)Yes(No)  
 (↓ 10% for females)

| Lead         | RBBB            |     | LAFB          |     | LAFB + RBBB     |     | LVH                    |     | No Confounders |     |
|--------------|-----------------|-----|---------------|-----|-----------------|-----|------------------------|-----|----------------|-----|
|              | Criteria        | Pts | Criteria      | Pts | Criteria        | Pts | Criteria               | Pts | Criteria       | Pts |
| I            | Q ≥ 30 ms       | 1   | Q ≥ 30 ms     | 1   | Q ≥ 30 ms       | 1   | Q ≥ 30 ms              | 1   | Q ≥ 30 ms      | 1   |
|              | R/Q ≤ 1         | 1   | R/Q ≤ 1       | 1   | R/Q ≤ 1         | 1   | R/Q ≤ 1                | 1   | R/Q ≤ 1        | 1   |
| II           | R ≤ 0.2 mV      | 1   | R ≤ 0.2 mV    | 1   | R ≤ 0.2 mV      | 1   | R ≤ 0.2 mV             | 1   | R ≤ 0.2 mV     | 1   |
|              | Q ≥ 40 ms       | 2   | Q ≥ 40 ms     | 2   | Q ≥ 40 ms       | 2   | Q ≥ 40 ms              | 2   | Q ≥ 40 ms      | 2   |
| aVL          | Q ≥ 30 ms       | 1   | Q ≥ 30 ms     | 1   | Q ≥ 30 ms       | 1   | Q ≥ 30 ms              | 1   | Q ≥ 30 ms      | 1   |
|              | R/Q ≤ 1         | 1   | R/Q ≤ 1       | 1   | R/Q ≤ 1         | 1   | R/Q ≤ 1                | 1   | R/Q ≤ 1        | 1   |
| aVF          | Q ≥ 50 ms       | 3   | Q ≥ 50 ms     | 3   | Q ≥ 50 ms       | 3   | Q ≥ 60 ms              | 3   | Q ≥ 50 ms      | 3   |
|              | Q ≥ 40 ms       | 2   | Q ≥ 40 ms     | 2   | Q ≥ 40 ms       | 2   | Q ≥ 50 ms              | 2   | Q ≥ 40 ms      | 2   |
| V1           | Q ≥ 30 ms       | 1   | Q ≥ 30 ms     | 1   | Q ≥ 30 ms       | 1   | Q ≥ 40 ms              | 1   | Q ≥ 30 ms      | 1   |
|              | R/Q ≤ 1         | 1   | R/Q ≤ 1       | 1   | R/Q ≤ 1         | 1   | R/Q ≤ 1                | 1   | R/Q ≤ 1        | 1   |
| Ant.         | any Q           | 1   | any QR        | 1   | any Q           | 1   | any QR (or any Q if *) | 1   | any Q          | 1   |
|              | Init R ≤ 20 ms  | 1   |               |     |                 |     | Ntchlnit40             |     |                |     |
| V1 Post.*    | Init R ≥ 60 ms  | 2   | R/S ≥ 1       | 1   | Init R ≥ 60 ms  | 2   | R/S ≥ 1                | 1   | R/S ≥ 1        | 1   |
|              | Init R ≥ 15 mV  | 1   | R ≥ 50 ms     | 2   | Init R ≥ 15 mV  | 1   | R ≥ 1mV                | 1   | R ≥ 1mV        | 1   |
| V2           | Init R ≥ 50 ms  | 1   | R ≥ 40 ms     | 1   | Init R ≥ 50 ms  | 1   | R ≥ 40 ms              | 1   | R ≥ 40 ms      | 1   |
|              | Init R ≥ 10 mV  | 1   | R ≥ 0.7 mV    | 1   | Init R ≥ 10 mV  | 1   | R ≥ 0.7 mV             | 1   | R ≥ 0.7 mV     | 1   |
| Ant.         | Q ≥ 50 ms       | 2   | Qs0.2&Ss0.2mV | 1   | Q ≥ 50 ms       | 2   | Qs0.2&Ss0.2 mV         | 1   | Qs0.2&Ss0.2mV  | 1   |
|              | any Q           | 1   | any QR        | 1   | any Q           | 1   | any QR (or any Q if *) | 1   | any Q          | 1   |
| V2 Post.*    | R ≤ 10 ms       | 1   | R ≤ 10 ms     | 1   | R ≤ 10 ms       | 1   | R ≤ 10 ms              | 1   | R ≤ 10 ms      | 1   |
|              | R ≤ 0.1mV       | 1   | R ≤ 0.1mV     | 1   | R ≤ 0.1mV       | 1   | Ntchlnit40             |     | R ≤ 0.1mV      | 1   |
| Ant.         | Init R ≥ 70 ms  | 2   | R/S ≥ 15      | 1   | Init R ≥ 70 ms  | 2   | R/S ≥ 15               | 1   | R/S ≥ 15       | 1   |
|              | Init R ≥ 2.5 mV | 1   | R ≥ 60 ms     | 2   | Init R ≥ 2.5 mV | 1   | R ≥ 60 ms              | 2   | R ≥ 60 ms      | 2   |
| V3           | Init R ≥ 50 ms  | 1   | R ≥ 50 ms     | 1   | Init R ≥ 50 ms  | 1   | R ≥ 50 ms              | 1   | R ≥ 50 ms      | 1   |
|              | Init R ≥ 2.0 mV | 1   | R ≥ 15 mV     | 1   | Init R ≥ 2.0 mV | 1   | R ≥ 15 mV              | 1   | R ≥ 15 mV      | 1   |
| Ant.         | Qs0.3&Ss0.3mV   | 1   | Qs0.3&Ss0.3mV | 1   | Qs0.3&Ss0.3mV   | 1   | Qs0.3&Ss0.3mV          | 1   | Qs0.3&Ss0.3mV  | 1   |
|              | Q ≥ 30 ms       | 2   | Q ≥ 30 ms     | 2   | Q ≥ 30 ms       | 2   | QR& (Q ≥ 30 ms)        | 2   | Q ≥ 30 ms      | 2   |
| V4           | R ≤ 10 ms       | 1   | R ≤ 10 ms     | 1   | R ≤ 10 ms       | 1   | Ntchlnit40             | 1   | R ≤ 10 ms      | 1   |
|              | Q ≥ 20 ms       | 1   | Q ≥ 20 ms     | 1   | Q ≥ 20 ms       | 1   | any QR (or any Q if *) | 1   | Q ≥ 20 ms      | 1   |
| Ant.         | Q ≥ 20 ms       | 1   | Q ≥ 20 ms     | 1   | Q ≥ 20 ms       | 1   | Q ≥ 20 ms              | 1   | Q ≥ 20 ms      | 1   |
|              | R/Q ≤ 0.5       | 2   | R/Q ≤ 0.5     | 2   | R/Q ≤ 0.5       | 2   | R/Q ≤ 0.5              | 2   | R/Q ≤ 0.5      | 2   |
| V5           | R/S ≤ 1         | 1   | R/S ≤ 1       | 1   | R/S ≤ 1         | 1   | R/S ≤ 1                | 1   | R/S ≤ 1        | 1   |
|              | R/Q ≤ 2         | 1   | R/Q ≤ 2       | 1   | R/Q ≤ 2         | 1   | R/Q ≤ 2                | 1   | R/Q ≤ 2        | 1   |
| Ant.         | R/S ≤ 2         | 1   | R/S ≤ 15      | 1   | R/S ≤ 2         | 1   | R/S ≤ 2                | 1   | R/S ≤ 2        | 1   |
|              | R ≤ 0.6 mV      | 1   | R ≤ 0.6 mV    | 1   | R ≤ 0.6 mV      | 1   | R ≤ 0.6 mV             | 1   | R ≤ 0.6 mV     | 1   |
| V6           | Q ≥ 30 ms       | 1   | Q ≥ 30 ms     | 1   | Q ≥ 30 ms       | 1   | Q ≥ 30 ms              | 1   | Q ≥ 30 ms      | 1   |
|              | R/Q ≤ 1         | 2   | R/Q ≤ 1       | 2   | R/Q ≤ 1         | 2   | R/Q ≤ 1                | 2   | R/Q ≤ 1        | 2   |
| Ant.         | R/S ≤ 1         | 1   | R/S ≤ 1       | 1   | R/S ≤ 1         | 1   | R/S ≤ 1                | 1   | R/S ≤ 1        | 1   |
|              | R/Q ≤ 3         | 1   | R/Q ≤ 3       | 1   | R/Q ≤ 3         | 1   | R/Q ≤ 3                | 1   | R/Q ≤ 3        | 1   |
| Total        | R/S ≤ 3         | 1   | R/S ≤ 2       | 1   | R/S ≤ 3         | 1   | R/S ≤ 3                | 1   | R/S ≤ 3        | 1   |
|              | R ≤ 0.6 mV      | 1   | R ≤ 0.6 mV    | 1   | R ≤ 0.6 mV      | 1   | R ≤ 0.6 mV             | 1   | R ≤ 0.6 mV     | 1   |
| Total Points |                 |     |               |     |                 |     |                        |     |                | 0   |

| Lead     | Criteria   | Pts |
|----------|------------|-----|
| I        | any Q      | 1   |
|          | R/Q ≤ 1    | 2   |
| II       | R/S ≤ 1    | 1   |
|          | R/Q ≤ 15   | 1   |
| aVL      | R/S ≤ 15   | 1   |
|          | Q ≥ 40 ms  | 2   |
| aVF      | Q ≥ 30 ms  | 1   |
|          | R/Q ≤ 0.5  | 1   |
| V1       | R/S ≤ 0.5  | 2   |
|          | R/Q ≤ 0.5  | 1   |
| Ant.     | R/S ≤ 1    | 1   |
|          | R/Q ≤ 1    | 1   |
| V1 Post. | Q ≥ 50 ms  | 2   |
|          | Q ≥ 40 ms  | 1   |
| Ant.     | R/Q ≤ 0.5  | 1   |
|          | R/S ≤ 0.5  | 1   |
| V2       | Nchlnit40  | 1   |
|          | R ≥ 0.3 mV | 2   |
| Ant.     | R ≥ 30 ms  | 1   |
|          | R ≥ 0.2 mV | 1   |
| V1 Post. | R ≥ 20 ms  | 1   |
|          | S/S' ≥ 2.0 | 3   |
| Ant.     | S/S' ≥ 15  | 2   |
|          | S/S' ≥ 125 | 1   |
| V2       | Nchlnit40  | 1   |
|          | R ≥ 0.4 mV | 2   |
| Ant.     | R ≥ 30 ms  | 1   |
|          | R ≥ 0.3 mV | 1   |
| V2       | R ≥ 20 ms  | 1   |
|          | S/S' ≥ 2.5 | 3   |
| Ant.     | S/S' ≥ 2.0 | 2   |
|          | S/S' ≥ 15  | 1   |
| V5       | any Q      | 1   |
|          | R/R' ≥ 2   | 2   |
| Ant.     | R/R' ≥ 1   | 1   |
|          | R/S ≤ 2    | 1   |
| V6       | R ≤ 0.5 mV | 1   |
|          | R/R' ≥ 2   | 2   |
| Ant.     | R/R' ≥ 1   | 1   |
|          | R/S ≤ 2    | 1   |
| Total    | R ≤ 0.6 mV | 1   |
|          | Points     |     |

%LV infarct (3 #pts) \_\_\_\_\_

%LV infarct (3 x#pts) \_\_\_\_\_ %LV infarct (3 x#pts) \_\_\_\_\_ %LV infarct (3 x#pts) \_\_\_\_\_ %LV infarct (3 x#pts) \_\_\_\_\_ %LV infarct (3 x#pts) \_\_\_\_\_ 0

\* (for LVH) if ≥ 4 other points in leads I, aVL, V4, V5 or V6 then count QS in V1+V3

\*\* (RAO) if P positive amp in V1 ≥ 0.1mV or aVF P ≥ 0.175 mV, then exclude V1+V2 Post criteria

\*\*\* (RAO) if P positive amp in V1 ≥ 0.1mV or aVF P ≥ 0.175 mV, then exclude V1+V2 R-criteria points

QRS scoring

Patient ID 03 QRS duration 158ms Amplitude adjust -21%  
 (↑1%/yr age 20-54; ↓1%/yr >55 yrs; ↓ 10% for females)  
 Age & gender 76 Male QRS axis -1° Duration adjust 0% RAO(\*\*, \*\*\*)Yes/No  
 (↓ 10% for females)

| Lead         | RBBB                                                                                  |                            | LAFB                                                                                  |                            | LAFB + RBBB                                                                           |                            | LVH                                                                                   |                            | No Confounders                                                                        |                            |
|--------------|---------------------------------------------------------------------------------------|----------------------------|---------------------------------------------------------------------------------------|----------------------------|---------------------------------------------------------------------------------------|----------------------------|---------------------------------------------------------------------------------------|----------------------------|---------------------------------------------------------------------------------------|----------------------------|
|              | Criteria                                                                              | Pts                        |
| I            | Q ≥ 30 ms<br>R/Q ≤ 1<br>R ≤ 0.2 mV                                                    | 1                          | Q ≥ 30 ms<br>R/Q ≤ 1<br>R ≤ 0.2 mV                                                    | 1                          | Q ≥ 30 ms<br>R/Q ≤ 1<br>R ≤ 0.2 mV                                                    | 1                          | Q ≥ 30 ms<br>R/Q ≤ 1<br>R ≤ 0.2 mV                                                    | 1                          | Q ≥ 30 ms<br>R/Q ≤ 1<br>R ≤ 0.2 mV                                                    | 1                          |
| II           | Q ≥ 40 ms<br>Q ≥ 30 ms                                                                | 2                          | Q ≥ 40 ms<br>Q ≥ 30 ms                                                                | 2                          | Q ≥ 40 ms<br>Q ≥ 30 ms                                                                | 2                          | Q ≥ 40 ms<br>Q ≥ 30 ms                                                                | 2                          | Q ≥ 40 ms<br>Q ≥ 30 ms                                                                | 2                          |
| aVL          | Q ≥ 30 ms<br>R/Q ≤ 1                                                                  | 1                          | Q ≥ 40 ms<br>R/Q ≤ 1                                                                  | 1                          | Q ≥ 40 ms<br>R/Q ≤ 1                                                                  | 1                          | Q ≥ 40 ms<br>R/Q ≤ 1                                                                  | 1                          | Q ≥ 30 ms<br>R/Q ≤ 1                                                                  | 1                          |
| aVF          | Q ≥ 50 ms<br>Q ≥ 40 ms<br>Q ≥ 30 ms<br>R/Q ≤ 1<br>R/Q ≤ 2                             | 3<br>2<br>2<br>2           | Q ≥ 50 ms<br>Q ≥ 40 ms<br>Q ≥ 30 ms<br>R/Q ≤ 1<br>R/Q ≤ 2                             | 3<br>2<br>1<br>2<br>1      | Q ≥ 50 ms<br>Q ≥ 40 ms<br>Q ≥ 30 ms<br>R/Q ≤ 1<br>R/Q ≤ 2                             | 3<br>2<br>1<br>2<br>1      | Q ≥ 60 ms<br>Q ≥ 50 ms<br>Q ≥ 40 ms<br>R/Q ≤ 1<br>R/Q ≤ 2                             | 3<br>2<br>1<br>2<br>1      | Q ≥ 50 ms<br>Q ≥ 40 ms<br>Q ≥ 30 ms<br>R/Q ≤ 1<br>R/Q ≤ 2                             | 3<br>2<br>1<br>2<br>1      |
| V1 Ant.      | Q ≥ 50 ms<br>any Q<br>Init R ≤ 20 ms                                                  | 2<br>1                     | any QR                                                                                | 1                          | any Q                                                                                 | 1                          | any QR<br>(or any Q if *)<br>Ntchlnit40                                               | 1                          | any Q                                                                                 | 1                          |
| V1 Post.**   | Init R ≥ 60 ms<br>Init R ≥ 15 mV<br>Init R ≥ 50 ms<br>Init R ≥ 10 mV                  | 2<br>1<br>1<br>1           | R/S ≥ 1<br>R ≥ 50 ms<br>R ≥ 1 mV<br>R ≥ 40 ms<br>R ≥ 0.7 mV<br>Qs0.2&Ss0.2mV          | 1<br>2<br>1<br>1<br>1<br>1 | Init R ≥ 60 ms<br>Init R ≥ 15 mV<br>Init R ≥ 50 ms<br>Init R ≥ 10 mV                  | 2<br>1<br>1<br>1           | R/S ≥ 1<br>R ≥ 50 ms<br>R ≥ 1 mV<br>R ≥ 40 ms<br>R ≥ 0.7 mV<br>Qs0.2&Ss0.2 mV         | 1<br>2<br>1<br>1<br>1<br>1 | R/S ≥ 1<br>R ≥ 50 ms<br>R ≥ 1 mV<br>R ≥ 40 ms<br>R ≥ 0.7 mV<br>Qs0.2&Ss0.2 mV         | 1<br>2<br>1<br>1<br>1<br>1 |
| V2 Ant.      | Q ≥ 50 ms<br>any Q<br>R ≤ 10 ms<br>R ≤ 0.1 mV                                         | 2<br>1                     | any QR<br>R ≤ 10 ms<br>R ≤ 0.1 mV                                                     | 1                          | any Q<br>R ≤ 10 ms<br>R ≤ 0.1 mV                                                      | 1                          | any QR<br>(or any Q if *)<br>Ntchlnit40                                               | 1                          | any Q<br>R ≤ 10 ms<br>R ≤ 0.1 mV                                                      | 1                          |
| V2 Post.**   | Init R ≥ 70 ms<br>Init R ≥ 2.5 mV<br>Init R ≥ 50 ms<br>Init R ≥ 2.0 mV                | 2<br>1<br>1<br>1           | R/S ≥ 15<br>R ≥ 60 ms<br>R ≥ 2 mV<br>R ≥ 50 ms<br>R ≥ 15 mV<br>Qs0.3&Ss0.3mV          | 1<br>2<br>1<br>1<br>1<br>1 | Init R ≥ 70 ms<br>Init R ≥ 2.5 mV<br>Init R ≥ 50 ms<br>Init R ≥ 2.0 mV                | 2<br>1<br>1<br>1           | R/S ≥ 15<br>R ≥ 60 ms<br>R ≥ 2 mV<br>R ≥ 50 ms<br>R ≥ 15 mV<br>Qs0.3&Ss0.3mV          | 1<br>2<br>1<br>1<br>1<br>1 | R/S ≥ 15<br>R ≥ 60 ms<br>R ≥ 2 mV<br>R ≥ 50 ms<br>R ≥ 15 mV<br>Qs0.3&Ss0.3mV          | 1<br>2<br>1<br>1<br>1<br>1 |
| V3           | Q ≥ 30 ms<br>R ≤ 10 ms<br>Q ≥ 20 ms<br>R ≤ 20 ms                                      | 2<br>1<br>1<br>1           | Q ≥ 30 ms<br>R ≤ 10 ms<br>Q ≥ 20 ms<br>R ≤ 20 ms                                      | 2<br>1<br>1<br>1           | Q ≥ 30 ms<br>R ≤ 10 ms<br>Q ≥ 20 ms<br>R ≤ 20 ms                                      | 2<br>1<br>1<br>1           | QR&(Q ≥ 30 ms)<br>Ntchlnit40<br>any QR<br>(or any Q if *)                             | 2<br>1<br>1<br>1           | Q ≥ 30 ms<br>R ≤ 10 ms<br>Q ≥ 20 ms<br>R ≤ 20 ms                                      | 2<br>1<br>1<br>1           |
| V4           | Q ≥ 20 ms<br>R/Q ≤ 0.5<br>R/S ≤ 0.5<br>R/Q ≤ 1<br>R/S ≤ 1<br>R ≤ 0.5 mV<br>Ntchlnit40 | 1<br>2<br>1<br>1<br>1<br>1 | Q ≥ 20 ms<br>R/Q ≤ 0.5<br>R/S ≤ 0.5<br>R/Q ≤ 1<br>R/S ≤ 1<br>R ≤ 0.5 mV<br>Ntchlnit40 | 1<br>2<br>1<br>1<br>1<br>1 | Q ≥ 20 ms<br>R/Q ≤ 0.5<br>R/S ≤ 0.5<br>R/Q ≤ 1<br>R/S ≤ 1<br>R ≤ 0.5 mV<br>Ntchlnit40 | 1<br>2<br>1<br>1<br>1<br>1 | Q ≥ 20 ms<br>R/Q ≤ 0.5<br>R/S ≤ 0.5<br>R/Q ≤ 1<br>R/S ≤ 1<br>R ≤ 0.5 mV<br>Ntchlnit40 | 1<br>2<br>1<br>1<br>1<br>1 | Q ≥ 20 ms<br>R/Q ≤ 0.5<br>R/S ≤ 0.5<br>R/Q ≤ 1<br>R/S ≤ 1<br>R ≤ 0.5 mV<br>Ntchlnit40 | 1<br>2<br>1<br>1<br>1<br>1 |
| V5           | Q ≥ 30 ms<br>R/Q ≤ 1<br>R/S ≤ 1<br>R/Q ≤ 2<br>R/S ≤ 2<br>R ≤ 0.6 mV<br>Ntchlnit40     | 1<br>2<br>1<br>1<br>1<br>1 | Q ≥ 30 ms<br>R/Q ≤ 1<br>R/S ≤ 1<br>R/Q ≤ 2<br>R/S ≤ 15<br>R ≤ 0.6 mV<br>Ntchlnit40    | 1<br>2<br>1<br>1<br>1<br>1 | Q ≥ 30 ms<br>R/Q ≤ 1<br>R/S ≤ 1<br>R/Q ≤ 2<br>R/S ≤ 15<br>R ≤ 0.6 mV<br>Ntchlnit40    | 1<br>2<br>1<br>1<br>1<br>1 | Q ≥ 30 ms<br>R/Q ≤ 1<br>R/S ≤ 1<br>R/Q ≤ 2<br>R/S ≤ 2<br>R ≤ 0.6 mV<br>Ntchlnit40     | 1<br>2<br>1<br>1<br>1<br>1 | Q ≥ 30 ms<br>R/Q ≤ 1<br>R/S ≤ 1<br>R/Q ≤ 2<br>R/S ≤ 2<br>R ≤ 0.6 mV<br>Ntchlnit40     | 1<br>2<br>1<br>1<br>1<br>1 |
| V6           | Q ≥ 30 ms<br>R/Q ≤ 1<br>R/S ≤ 1<br>R/Q ≤ 3<br>R/S ≤ 3<br>R ≤ 0.6 mV<br>Ntchlnit40     | 1<br>2<br>1<br>1<br>1<br>1 | Q ≥ 30 ms<br>R/Q ≤ 1<br>R/S ≤ 1<br>R/Q ≤ 3<br>R/S ≤ 2<br>R ≤ 0.6 mV<br>Ntchlnit40     | 1<br>2<br>1<br>1<br>1<br>1 | Q ≥ 30 ms<br>R/Q ≤ 1<br>R/S ≤ 1<br>R/Q ≤ 3<br>R/S ≤ 2<br>R ≤ 0.6 mV<br>Ntchlnit40     | 1<br>2<br>1<br>1<br>1<br>1 | Q ≥ 30 ms<br>R/Q ≤ 1<br>R/S ≤ 1<br>R/Q ≤ 3<br>R/S ≤ 3<br>R ≤ 0.6 mV<br>Ntchlnit40     | 1<br>2<br>1<br>1<br>1<br>1 | Q ≥ 30 ms<br>R/Q ≤ 1<br>R/S ≤ 1<br>R/Q ≤ 3<br>R/S ≤ 3<br>R ≤ 0.6 mV<br>Ntchlnit40     | 1<br>2<br>1<br>1<br>1<br>1 |
| <b>Total</b> | Points                                                                                |                            |

| LBBB         |                                                                  |                       |
|--------------|------------------------------------------------------------------|-----------------------|
| Lead         | Criteria                                                         | Pts                   |
| I            | any Q<br>R/Q ≤ 1<br>R/S ≤ 1<br>R/Q ≤ 15<br>R/S ≤ 15              | 1<br>2<br>1<br>1      |
| II           | Q ≥ 40 ms<br>Q ≥ 30 ms                                           | 2<br>1                |
| aVL          | Q ≥ 50 ms<br>Q ≥ 40 ms<br>R/S ≤ 0.5                              | 2<br>1<br>2           |
| aVF          | Q ≥ 50 ms<br>Q ≥ 40 ms<br>R/Q ≤ 0.5                              | 2<br>1<br>1           |
| V1 Ant.***   | Ntchlnit40<br>R ≥ 0.3 mV<br>R ≥ 30 ms<br>R ≥ 0.2 mV<br>R ≥ 20 ms | 1<br>2<br>1<br>1      |
| V1 Post      | S/S' ≥ 2.0<br>S/S' ≥ 15<br>S/S' ≥ 125                            | 3<br>2<br>1           |
| V2 Ant.***   | Ntchlnit40<br>R ≥ 0.4 mV<br>R ≥ 30 ms<br>R ≥ 0.3 mV<br>R ≥ 20 ms | 1<br>2<br>1<br>1      |
| V2 Post      | S/S' ≥ 2.5<br>S/S' ≥ 2.0<br>S/S' ≥ 15                            | 3<br>2<br>1           |
| V5           | any Q<br>R/R' ≥ 2<br>R/R' ≥ 1<br>R/S ≤ 2<br>R ≤ 0.5 mV           | 1<br>2<br>1<br>1<br>1 |
| V6           | Q ≥ 20 ms<br>R/R' ≥ 2<br>R/R' ≥ 1<br>R/S ≤ 2<br>R ≤ 0.6 mV       | 1<br>2<br>1<br>1<br>1 |
| <b>Total</b> | Points                                                           | <b>2</b>              |

%LV infarct 6  
(3 #pts)

%LV infarct (3 x #pts) ——— %LV infarct (3 x #pts) ———

\* (for LVH) if ≥ 4 other points in leads I, aVL, V4, V5 or V6 then count QS in V1+V3  
 \*\* (RAO) if P positive amp in V1 ≥ 0.1 mV or aVF P ≥ 0.175 mV, then exclude V1+V2 Post criteria  
 \*\*\* (RAO) if P positive amp in V1 ≥ 0.1 mV or aVF P ≥ 0.175 mV, then exclude V1+V2 R-criteria points

QRS duration

Patient ID 04 QRS duration 148ms Amplitude adjust -4%  
 (↑1%/yr age 20-54; ↓1%/yr >55 yrs; ↓ 10% for females)

Age & gender 59 Male QRS axis +87° Duration adjust 0% RAO(\*\*, \*\*\*)Yes(No)  
 (↓ 10% for females)

| Lead       | RBBB                                                                                  |     | LAFB                                                                                  |     | LAFB + RBBB                                                                           |     | LVH                                                                                   |     | No Confounders                                                                        |     |
|------------|---------------------------------------------------------------------------------------|-----|---------------------------------------------------------------------------------------|-----|---------------------------------------------------------------------------------------|-----|---------------------------------------------------------------------------------------|-----|---------------------------------------------------------------------------------------|-----|
|            | Criteria                                                                              | Pts |
| I          | Q ≥ 30 ms<br>R/Q ≤ 1<br>R ≤ 0.2 mV                                                    | 1   | Q ≥ 30 ms<br>R/Q ≤ 1<br>R ≤ 0.2 mV                                                    | 1   | Q ≥ 30 ms<br>R/Q ≤ 1<br>R ≤ 0.2 mV                                                    | 1   | Q ≥ 30 ms<br>R/Q ≤ 1<br>R ≤ 0.2 mV                                                    | 1   | Q ≥ 30 ms<br>R/Q ≤ 1<br>R ≤ 0.2 mV                                                    | 1   |
| II         | Q ≥ 40 ms<br>Q ≥ 30 ms                                                                | 2   | Q ≥ 40 ms<br>Q ≥ 30 ms                                                                | 2   | Q ≥ 40 ms<br>Q ≥ 30 ms                                                                | 2   | Q ≥ 40 ms<br>Q ≥ 30 ms                                                                | 2   | Q ≥ 40 ms<br>Q ≥ 30 ms                                                                | 2   |
| aVL        | Q ≥ 30 ms<br>R/Q ≤ 1                                                                  | 1   | Q ≥ 40 ms<br>R/Q ≤ 1                                                                  | 1   | Q ≥ 40 ms<br>R/Q ≤ 1                                                                  | 1   | Q ≥ 40 ms<br>R/Q ≤ 1                                                                  | 1   | Q ≥ 30 ms<br>R/Q ≤ 1                                                                  | 1   |
| aVF        | Q ≥ 50 ms<br>Q ≥ 40 ms<br>Q ≥ 30 ms<br>R/Q ≤ 1<br>R/Q ≤ 2                             | 3   | Q ≥ 50 ms<br>Q ≥ 40 ms<br>Q ≥ 30 ms<br>R/Q ≤ 1<br>R/Q ≤ 2                             | 3   | Q ≥ 50 ms<br>Q ≥ 40 ms<br>Q ≥ 30 ms<br>R/Q ≤ 1<br>R/Q ≤ 2                             | 3   | Q ≥ 60 ms<br>Q ≥ 50 ms<br>Q ≥ 40 ms<br>R/Q ≤ 1<br>R/Q ≤ 2                             | 3   | Q ≥ 50 ms<br>Q ≥ 40 ms<br>Q ≥ 30 ms<br>R/Q ≤ 1<br>R/Q ≤ 2                             | 3   |
| V1 Ant.    | Q ≥ 50 ms<br>any Q<br>Init R ≤ 20 ms                                                  | 2   | any QR<br>any QR                                                                      | 1   | any Q<br>any Q                                                                        | 1   | any QR<br>(or any Q if *)<br>Ntchlnit40                                               | 1   | any Q<br>any Q                                                                        | 1   |
| V1 Post.** | Init R ≥ 60 ms<br>Init R ≥ 15 mV<br>Init R ≥ 50 ms<br>Init R ≥ 10 mV                  | 2   | R ≥ 50 ms<br>R ≥ 1mV<br>R ≥ 40 ms<br>R ≥ 0.7 mV                                       | 2   | Init R ≥ 60 ms<br>Init R ≥ 15 mV<br>Init R ≥ 50 ms<br>Init R ≥ 10 mV                  | 2   | R ≥ 50 ms<br>R ≥ 1mV<br>R ≥ 40 ms<br>R ≥ 0.7 mV                                       | 2   | R ≥ 50 ms<br>R ≥ 1mV<br>R ≥ 40 ms<br>R ≥ 0.7 mV                                       | 2   |
| V2 Ant.    | Q ≥ 50 ms<br>any Q<br>R ≤ 10 ms<br>R ≤ 0.1mV                                          | 2   | any QR<br>any QR<br>R ≤ 10 ms<br>R ≤ 0.1mV                                            | 1   | Q ≥ 50 ms<br>any Q<br>R ≤ 10 ms<br>R ≤ 0.1mV                                          | 2   | any QR<br>(or any Q if *)<br>Ntchlnit40                                               | 1   | any Q<br>R ≤ 10 ms<br>R ≤ 0.1mV                                                       | 1   |
| V2 Post.** | Init R ≥ 70 ms<br>Init R ≥ 2.5 mV<br>Init R ≥ 50 ms<br>Init R ≥ 2.0 mV                | 2   | R/S ≥ 15<br>R ≥ 60 ms<br>R ≥ 2 mV<br>R ≥ 50 ms<br>R ≥ 15 mV                           | 1   | Init R ≥ 70 ms<br>Init R ≥ 2.5 mV<br>Init R ≥ 50 ms<br>Init R ≥ 2.0 mV                | 2   | R/S ≥ 15<br>R ≥ 60 ms<br>R ≥ 2 mV<br>R ≥ 50 ms<br>R ≥ 15 mV                           | 1   | R/S ≥ 15<br>R ≥ 60 ms<br>R ≥ 2 mV<br>R ≥ 50 ms<br>R ≥ 15 mV                           | 1   |
| V3         | Q ≥ 30 ms<br>R ≤ 10 ms<br>Q ≥ 20 ms<br>R ≤ 20 ms                                      | 2   | Q ≥ 30 ms<br>R ≤ 10 ms<br>Q ≥ 20 ms<br>R ≤ 20 ms                                      | 2   | Q ≥ 30 ms<br>R ≤ 10 ms<br>Q ≥ 20 ms<br>R ≤ 20 ms                                      | 2   | QR& (Q ≥ 30 ms)<br>Ntchlnit40<br>any QR<br>(or any Q if *)                            | 1   | Q ≥ 30 ms<br>R ≤ 10 ms<br>Q ≥ 20 ms<br>R ≤ 20 ms                                      | 2   |
| V4         | Q ≥ 20 ms<br>R/Q ≤ 0.5<br>R/S ≤ 0.5<br>R/Q ≤ 1<br>R/S ≤ 1<br>R ≤ 0.5 mV<br>Ntchlnit40 | 1   | Q ≥ 20 ms<br>R/Q ≤ 0.5<br>R/S ≤ 0.5<br>R/Q ≤ 1<br>R/S ≤ 1<br>R ≤ 0.5 mV<br>Ntchlnit40 | 1   | Q ≥ 20 ms<br>R/Q ≤ 0.5<br>R/S ≤ 0.5<br>R/Q ≤ 1<br>R/S ≤ 1<br>R ≤ 0.5 mV<br>Ntchlnit40 | 1   | Q ≥ 20 ms<br>R/Q ≤ 0.5<br>R/S ≤ 0.5<br>R/Q ≤ 1<br>R/S ≤ 1<br>R ≤ 0.5 mV<br>Ntchlnit40 | 1   | Q ≥ 20 ms<br>R/Q ≤ 0.5<br>R/S ≤ 0.5<br>R/Q ≤ 1<br>R/S ≤ 1<br>R ≤ 0.5 mV<br>Ntchlnit40 | 1   |
| V5         | Q ≥ 30 ms<br>R/Q ≤ 1<br>R/S ≤ 1<br>R/Q ≤ 2<br>R/S ≤ 2<br>R ≤ 0.6 mV<br>Ntchlnit40     | 1   | Q ≥ 30 ms<br>R/Q ≤ 1<br>R/S ≤ 1<br>R/Q ≤ 2<br>R/S ≤ 2<br>R ≤ 0.6 mV<br>Ntchlnit40     | 1   | Q ≥ 30 ms<br>R/Q ≤ 1<br>R/S ≤ 1<br>R/Q ≤ 2<br>R/S ≤ 2<br>R ≤ 0.6 mV<br>Ntchlnit40     | 1   | Q ≥ 30 ms<br>R/Q ≤ 1<br>R/S ≤ 1<br>R/Q ≤ 2<br>R/S ≤ 2<br>R ≤ 0.6 mV<br>Ntchlnit40     | 1   | Q ≥ 30 ms<br>R/Q ≤ 1<br>R/S ≤ 1<br>R/Q ≤ 2<br>R/S ≤ 2<br>R ≤ 0.6 mV<br>Ntchlnit40     | 1   |
| V6         | Q ≥ 30 ms<br>R/Q ≤ 1<br>R/S ≤ 1<br>R/Q ≤ 3<br>R/S ≤ 3<br>R ≤ 0.6 mV<br>Ntchlnit40     | 1   | Q ≥ 30 ms<br>R/Q ≤ 1<br>R/S ≤ 1<br>R/Q ≤ 3<br>R/S ≤ 3<br>R ≤ 0.6 mV<br>Ntchlnit40     | 1   | Q ≥ 30 ms<br>R/Q ≤ 1<br>R/S ≤ 1<br>R/Q ≤ 3<br>R/S ≤ 3<br>R ≤ 0.6 mV<br>Ntchlnit40     | 1   | Q ≥ 30 ms<br>R/Q ≤ 1<br>R/S ≤ 1<br>R/Q ≤ 3<br>R/S ≤ 3<br>R ≤ 0.6 mV<br>Ntchlnit40     | 1   | Q ≥ 30 ms<br>R/Q ≤ 1<br>R/S ≤ 1<br>R/Q ≤ 3<br>R/S ≤ 3<br>R ≤ 0.6 mV<br>Ntchlnit40     | 1   |
| Total      | Points                                                                                | 0   |

| Lead       | Criteria                                                         | Pts |
|------------|------------------------------------------------------------------|-----|
| I          | any Q<br>R/Q ≤ 1<br>R/S ≤ 1<br>R/Q ≤ 15<br>R/S ≤ 15              | 1   |
| II         | Q ≥ 40 ms<br>Q ≥ 30 ms                                           | 2   |
| aVL        | Q ≥ 50 ms<br>Q ≥ 40 ms<br>R/S ≤ 0.5<br>R/Q ≤ 0.5                 | 2   |
| aVF        | Q ≥ 50 ms<br>Q ≥ 40 ms<br>R/S ≤ 0.5<br>R/Q ≤ 0.5                 | 2   |
| V1 Ant.*** | Ntchlnit40<br>R ≥ 0.3 mV<br>R ≥ 30 ms<br>R ≥ 0.2 mV<br>R ≥ 20 ms | 1   |
| V1 Post    | S/S' ≥ 2.0<br>S/S' ≥ 15<br>S/S' ≥ 125                            | 3   |
| V2 Ant.*** | Ntchlnit40<br>R ≥ 0.4 mV<br>R ≥ 30 ms<br>R ≥ 0.3 mV<br>R ≥ 20 ms | 1   |
| V2 Post    | S/S' ≥ 2.5<br>S/S' ≥ 2.0<br>S/S' ≥ 15                            | 3   |
| V5         | any Q<br>R/R' ≥ 2<br>R/R' ≥ 1<br>R/S ≤ 2<br>R ≤ 0.5 mV           | 1   |
| V6         | Q ≥ 20 ms<br>R/R' ≥ 2<br>R/R' ≥ 1<br>R/S ≤ 2<br>R ≤ 0.6 mV       | 1   |
| Total      | Points                                                           | 0   |

%LV infarct \_\_\_\_\_  
 (3 x #pts)

%LV infarct 0 (3 x #pts)    %LV infarct \_\_\_\_\_ (3 x #pts)

\* (for LVH) if ≥ 4 other points in leads I, aVL, V4, V5 or V6 then count QS in V1+V3

\*\* (RAO) if P positive amp in V1 ≥ 0.1mV or aVF P ≥ 0.175 mV, then exclude V1+V2 Post criteria

\*\*\* (RAO) if P positive amp in V1 ≥ 0.1mV or aVF P ≥ 0.175 mV, then exclude V1+V2 R-criteria points

QRS scoring

Patient ID 05 QRS duration 150ms Amplitude adjust 0%  
 (↑1%/yr age 20-54; ↓1%/yr >55 yrs; ↓ 10% for females)

Age & gender 55 Male QRS axis +176° Duration adjust 0% RAO(\*\*, \*\*\*)Yes/No (No)  
 (↓ 10% for females)

|            | RBBB                                                                                  |                                 | LAFB                                                                                  |                                 | LAFB + RBBB                                                                           |                                 | LVH                                                                                   |                                 | No Confounders                                                                        |                                 |
|------------|---------------------------------------------------------------------------------------|---------------------------------|---------------------------------------------------------------------------------------|---------------------------------|---------------------------------------------------------------------------------------|---------------------------------|---------------------------------------------------------------------------------------|---------------------------------|---------------------------------------------------------------------------------------|---------------------------------|
| Lead       | Criteria                                                                              | Pts                             |
| I          | Q ≥ 30 ms<br>R/Q ≤ 1<br>R ≤ 0.2 mV                                                    | 1<br>1<br>1                     | Q ≥ 30 ms<br>R/Q ≤ 1<br>R ≤ 0.2 mV                                                    | 1<br>1<br>1                     | Q ≥ 30 ms<br>R/Q ≤ 1<br>R ≤ 0.2 mV                                                    | 1<br>1<br>1                     | Q ≥ 30 ms<br>R/Q ≤ 1<br>R ≤ 0.2 mV                                                    | 1<br>1<br>1                     | Q ≥ 30 ms<br>R/Q ≤ 1<br>R ≤ 0.2 mV                                                    | 1<br>1<br>1                     |
| II         | Q ≥ 40 ms<br>Q ≥ 30 ms                                                                | 2<br>1                          | Q ≥ 40 ms<br>Q ≥ 30 ms                                                                | 2<br>1                          | Q ≥ 40 ms<br>Q ≥ 30 ms                                                                | 2<br>1                          | Q ≥ 40 ms<br>Q ≥ 30 ms                                                                | 2<br>1                          | Q ≥ 40 ms<br>Q ≥ 30 ms                                                                | 2<br>1                          |
| aVL        | Q ≥ 30 ms<br>R/Q ≤ 1                                                                  | 1<br>1                          | Q ≥ 40 ms<br>R/Q ≤ 1                                                                  | 1<br>1                          | Q ≥ 40 ms<br>R/Q ≤ 1                                                                  | 1<br>1                          | Q ≥ 40 ms<br>R/Q ≤ 1                                                                  | 1<br>1                          | Q ≥ 30 ms<br>R/Q ≤ 1                                                                  | 1<br>1                          |
| aVF        | Q ≥ 50 ms<br>Q ≥ 40 ms<br>Q ≥ 30 ms<br>R/Q ≤ 1                                        | 3<br>2<br>1<br>2                | Q ≥ 50 ms<br>Q ≥ 40 ms<br>Q ≥ 30 ms<br>R/Q ≤ 1                                        | 3<br>2<br>1<br>2                | Q ≥ 50 ms<br>Q ≥ 40 ms<br>Q ≥ 30 ms<br>R/Q ≤ 1                                        | 3<br>2<br>1<br>2                | Q ≥ 60 ms<br>Q ≥ 50 ms<br>Q ≥ 40 ms<br>R/Q ≤ 1                                        | 3<br>2<br>1<br>2                | Q ≥ 50 ms<br>Q ≥ 40 ms<br>Q ≥ 30 ms<br>R/Q ≤ 1                                        | 3<br>2<br>1<br>2                |
| V1 Ant.    | Q ≥ 50 ms<br>any Q<br>Init R ≤ 20 ms                                                  | 2<br>1<br>1                     | any QR                                                                                | 1                               | any Q                                                                                 | 1                               | any QR<br>(or any Q if *)<br>Ntchlnit40                                               | 1                               | any Q                                                                                 | 1                               |
| V1 Post.** | Init R ≥ 60 ms<br>Init R ≥ 15 mV<br>Init R ≥ 50 ms<br>Init R ≥ 10 mV                  | 2<br>1<br>1<br>1                | R/S ≥ 1<br>R ≥ 50 ms<br>R ≥ 1 mV<br>R ≥ 40 ms<br>R ≥ 0.7 mV                           | 1<br>2<br>1<br>1                | Init R ≥ 60 ms<br>Init R ≥ 15 mV<br>Init R ≥ 50 ms<br>Init R ≥ 10 mV                  | 2<br>1<br>1<br>1                | R/S ≥ 1<br>R ≥ 50 ms<br>R ≥ 1 mV<br>R ≥ 40 ms<br>R ≥ 0.7 mV                           | 1<br>2<br>1<br>1                | R/S ≥ 1<br>R ≥ 50 ms<br>R ≥ 1 mV<br>R ≥ 40 ms<br>R ≥ 0.7 mV                           | 1<br>2<br>1<br>1                |
| V2 Ant.    | Q ≥ 50 ms<br>any Q<br>R ≤ 10 ms<br>R ≤ 0.1 mV                                         | 2<br>1<br>1<br>1                | any QR<br>R ≤ 10 ms<br>R ≤ 0.1 mV                                                     | 1<br>1<br>1                     | Q ≥ 50 ms<br>any Q<br>R ≤ 10 ms<br>R ≤ 0.1 mV                                         | 2<br>1<br>1<br>1                | any QR<br>(or any Q if *)<br>Ntchlnit40                                               | 1                               | any Q<br>R ≤ 10 ms<br>R ≤ 0.1 mV                                                      | 1                               |
| V2 Post.** | Init R ≥ 70 ms<br>Init R ≥ 2.5 mV<br>Init R ≥ 50 ms<br>Init R ≥ 2.0 mV                | 2<br>1<br>1<br>1                | R/S ≥ 15<br>R ≥ 60 ms<br>R ≥ 2 mV<br>R ≥ 50 ms<br>R ≥ 15 mV                           | 1<br>2<br>1<br>1<br>1           | Init R ≥ 70 ms<br>Init R ≥ 2.5 mV<br>Init R ≥ 50 ms<br>Init R ≥ 2.0 mV                | 2<br>1<br>1<br>1                | R/S ≥ 15<br>R ≥ 60 ms<br>R ≥ 2 mV<br>R ≥ 50 ms<br>R ≥ 15 mV                           | 1<br>2<br>1<br>1                | R/S ≥ 15<br>R ≥ 60 ms<br>R ≥ 2 mV<br>R ≥ 50 ms<br>R ≥ 15 mV                           | 1<br>2<br>1<br>1                |
| V3         | Q ≥ 30 ms<br>R ≤ 10 ms<br>Q ≥ 20 ms<br>R ≤ 20 ms                                      | 2<br>1<br>1<br>1                | Q ≥ 30 ms<br>R ≤ 10 ms<br>Q ≥ 20 ms<br>R ≤ 20 ms                                      | 2<br>1<br>1<br>1                | Q ≥ 30 ms<br>R ≤ 10 ms<br>Q ≥ 20 ms<br>R ≤ 20 ms                                      | 2<br>1<br>1<br>1                | QR& (Q ≥ 30 ms)<br>Ntchlnit40<br>any QR<br>(or any Q if *)                            | 2<br>1<br>1<br>1                | Q ≥ 30 ms<br>R ≤ 10 ms<br>Q ≥ 20 ms<br>R ≤ 20 ms                                      | 2<br>1<br>1<br>1                |
| V4         | Q ≥ 20 ms<br>R/Q ≤ 0.5<br>R/S ≤ 0.5<br>R/Q ≤ 1<br>R/S ≤ 1<br>R ≤ 0.5 mV<br>Ntchlnit40 | 1<br>2<br>2<br>1<br>1<br>1<br>1 | Q ≥ 20 ms<br>R/Q ≤ 0.5<br>R/S ≤ 0.5<br>R/Q ≤ 1<br>R/S ≤ 1<br>R ≤ 0.5 mV<br>Ntchlnit40 | 1<br>2<br>2<br>1<br>1<br>1<br>1 | Q ≥ 20 ms<br>R/Q ≤ 0.5<br>R/S ≤ 0.5<br>R/Q ≤ 1<br>R/S ≤ 1<br>R ≤ 0.5 mV<br>Ntchlnit40 | 1<br>2<br>2<br>1<br>1<br>1<br>1 | Q ≥ 20 ms<br>R/Q ≤ 0.5<br>R/S ≤ 0.5<br>R/Q ≤ 1<br>R/S ≤ 1<br>R ≤ 0.5 mV<br>Ntchlnit40 | 1<br>2<br>2<br>1<br>1<br>1<br>1 | Q ≥ 20 ms<br>R/Q ≤ 0.5<br>R/S ≤ 0.5<br>R/Q ≤ 1<br>R/S ≤ 1<br>R ≤ 0.5 mV<br>Ntchlnit40 | 1<br>2<br>2<br>1<br>1<br>1<br>1 |
| V5         | Q ≥ 30 ms<br>R/Q ≤ 1<br>R/S ≤ 1<br>R/Q ≤ 2<br>R/S ≤ 2<br>R ≤ 0.6 mV<br>Ntchlnit40     | 1<br>2<br>1<br>1<br>1<br>1<br>1 | Q ≥ 30 ms<br>R/Q ≤ 1<br>R/S ≤ 1<br>R/Q ≤ 2<br>R/S ≤ 2<br>R ≤ 0.6 mV<br>Ntchlnit40     | 1<br>2<br>1<br>1<br>1<br>1<br>1 | Q ≥ 30 ms<br>R/Q ≤ 1<br>R/S ≤ 1<br>R/Q ≤ 2<br>R/S ≤ 2<br>R ≤ 0.6 mV<br>Ntchlnit40     | 1<br>2<br>1<br>1<br>1<br>1<br>1 | Q ≥ 30 ms<br>R/Q ≤ 1<br>R/S ≤ 1<br>R/Q ≤ 2<br>R/S ≤ 2<br>R ≤ 0.6 mV<br>Ntchlnit40     | 1<br>2<br>1<br>1<br>1<br>1<br>1 | Q ≥ 30 ms<br>R/Q ≤ 1<br>R/S ≤ 1<br>R/Q ≤ 2<br>R/S ≤ 2<br>R ≤ 0.6 mV<br>Ntchlnit40     | 1<br>2<br>1<br>1<br>1<br>1<br>1 |
| V6         | Q ≥ 30 ms<br>R/Q ≤ 1<br>R/S ≤ 1<br>R/Q ≤ 3<br>R/S ≤ 3<br>R ≤ 0.6 mV<br>Ntchlnit40     | 1<br>2<br>1<br>1<br>1<br>1<br>1 | Q ≥ 30 ms<br>R/Q ≤ 1<br>R/S ≤ 1<br>R/Q ≤ 3<br>R/S ≤ 3<br>R ≤ 0.6 mV<br>Ntchlnit40     | 1<br>2<br>1<br>1<br>1<br>1<br>1 | Q ≥ 30 ms<br>R/Q ≤ 1<br>R/S ≤ 1<br>R/Q ≤ 3<br>R/S ≤ 3<br>R ≤ 0.6 mV<br>Ntchlnit40     | 1<br>2<br>1<br>1<br>1<br>1<br>1 | Q ≥ 30 ms<br>R/Q ≤ 1<br>R/S ≤ 1<br>R/Q ≤ 3<br>R/S ≤ 3<br>R ≤ 0.6 mV<br>Ntchlnit40     | 1<br>2<br>1<br>1<br>1<br>1<br>1 | Q ≥ 30 ms<br>R/Q ≤ 1<br>R/S ≤ 1<br>R/Q ≤ 3<br>R/S ≤ 3<br>R ≤ 0.6 mV<br>Ntchlnit40     | 1<br>2<br>1<br>1<br>1<br>1<br>1 |
| Total      | Points                                                                                | 16                              | Points                                                                                |                                 | Points                                                                                |                                 | Points                                                                                |                                 | Points                                                                                |                                 |

| Lead       | Criteria                                                         | Pts                   |
|------------|------------------------------------------------------------------|-----------------------|
| I          | any Q<br>R/Q ≤ 1<br>R/S ≤ 1<br>R/Q ≤ 15<br>R/S ≤ 15              | 1<br>2<br>1<br>1<br>1 |
| II         | Q ≥ 40 ms<br>Q ≥ 30 ms<br>R/S ≤ 0.5<br>R/S ≤ 0.5                 | 2<br>1<br>1<br>1      |
| aVL        | Q ≥ 50 ms<br>Q ≥ 40 ms<br>R/S ≤ 0.5<br>R/Q ≤ 0.5                 | 2<br>1<br>1<br>1      |
| aVF        | Q ≥ 50 ms<br>Q ≥ 40 ms<br>R/S ≤ 0.5<br>R/Q ≤ 1                   | 2<br>1<br>1<br>1      |
| V1 Ant.*** | Ntchlnit40<br>R ≥ 0.3 mV<br>R ≥ 30 ms<br>R ≥ 0.2 mV<br>R ≥ 20 ms | 1<br>2<br>1<br>1<br>1 |
| V1 Post    | S/S' ≥ 2.0<br>S/S' ≥ 15<br>S/S' ≥ 125                            | 3<br>2<br>1           |
| V2 Ant.*** | Ntchlnit40<br>R ≥ 0.4 mV<br>R ≥ 30 ms<br>R ≥ 0.3 mV<br>R ≥ 20 ms | 1<br>2<br>1<br>1<br>1 |
| V2 Post    | S/S' ≥ 2.5<br>S/S' ≥ 2.0<br>S/S' ≥ 15                            | 3<br>2<br>1           |
| V5         | any Q<br>R/R' ≥ 2<br>R/R' ≥ 1<br>R/S ≤ 2<br>R ≤ 0.6 mV           | 1<br>2<br>1<br>1<br>1 |
| V6         | Q ≥ 20 ms<br>R/R' ≥ 2<br>R/R' ≥ 1<br>R/S ≤ 2<br>R ≤ 0.6 mV       | 1<br>2<br>1<br>1<br>1 |
| Total      | Points                                                           |                       |

%LV infarct (3 #pts) \_\_\_\_\_

%LV infarct 48 (3 x #pts)    %LV infarct \_\_\_\_\_ (3 x #pts)

\* (for LVH) if ≥ 4 other points in leads I, aVL, V4, V5 or V6 then count QS in V1+V3

\*\* (RAO) if P positive amp in V1 ≥ 0.1 mV or aVF P ≥ 0.175 mV, then exclude V1+V2 Post criteria

\*\*\* (RAO) if P positive amp in V1 ≥ 0.1 mV or aVF P ≥ 0.175 mV, then exclude V1+V2 R-criteria points

QRS Scoring

Patient ID 06 QRS duration 143ms Amplitude adjust -11%  
 (↑1%/yr age 20-54; ↓1%/yr >55 yrs; ↓ 10% for females)  
 Age & gender 66 Male QRS axis -40° Duration adjust 0% RAO(\*\*, \*\*\*)Yes/No  
 (↓ 10% for females)

| Lead         | RBBB                                                                                  |     | LAFB                                                                                  |     | LAFB + RBBB                                                                           |           | LVH                                                                                   |     | No Confounders                                                                        |     |
|--------------|---------------------------------------------------------------------------------------|-----|---------------------------------------------------------------------------------------|-----|---------------------------------------------------------------------------------------|-----------|---------------------------------------------------------------------------------------|-----|---------------------------------------------------------------------------------------|-----|
|              | Criteria                                                                              | Pts | Criteria                                                                              | Pts | Criteria                                                                              | Pts       | Criteria                                                                              | Pts | Criteria                                                                              | Pts |
| I            | Q ≥ 30 ms<br>R/Q ≤ 1<br>R ≤ 0.2 mV                                                    | 1   | Q ≥ 30 ms<br>R/Q ≤ 1<br>R ≤ 0.2 mV                                                    | 1   | Q ≥ 30 ms<br>R/Q ≤ 1<br>R ≤ 0.2 mV                                                    | 1         | Q ≥ 30 ms<br>R/Q ≤ 1<br>R ≤ 0.2 mV                                                    | 1   | Q ≥ 30 ms<br>R/Q ≤ 1<br>R ≤ 0.2 mV                                                    | 1   |
| II           | Q ≥ 40 ms<br>Q ≥ 30 ms                                                                | 2   | Q ≥ 40 ms<br>Q ≥ 30 ms                                                                | 2   | Q ≥ 40 ms<br>Q ≥ 30 ms                                                                | 2         | Q ≥ 40 ms<br>Q ≥ 30 ms                                                                | 2   | Q ≥ 40 ms<br>Q ≥ 30 ms                                                                | 2   |
| aVL          | Q ≥ 30 ms<br>R/Q ≤ 1                                                                  | 1   | Q ≥ 40 ms<br>R/Q ≤ 1                                                                  | 1   | Q ≥ 40 ms<br>R/Q ≤ 1                                                                  | 1         | Q ≥ 40 ms<br>R/Q ≤ 1                                                                  | 1   | Q ≥ 30 ms<br>R/Q ≤ 1                                                                  | 1   |
| aVF          | Q ≥ 50 ms<br>Q ≥ 40 ms<br>Q ≥ 30 ms<br>R/Q ≤ 1<br>R/Q ≤ 2                             | 3   | Q ≥ 50 ms<br>Q ≥ 40 ms<br>Q ≥ 30 ms<br>R/Q ≤ 1<br>R/Q ≤ 2                             | 3   | Q ≥ 50 ms<br>Q ≥ 40 ms<br>Q ≥ 30 ms<br>R/Q ≤ 1<br>R/Q ≤ 2                             | 3         | Q ≥ 60 ms<br>Q ≥ 50 ms<br>Q ≥ 40 ms<br>R/Q ≤ 1<br>R/Q ≤ 2                             | 3   | Q ≥ 50 ms<br>Q ≥ 40 ms<br>Q ≥ 30 ms<br>R/Q ≤ 1<br>R/Q ≤ 2                             | 3   |
| V1 Ant.      | Q ≥ 50 ms<br>any Q<br>Init R ≤ 20 ms                                                  | 2   | any QR<br>any QR                                                                      | 1   | Q ≥ 50 ms<br>any Q<br>any Q                                                           | 2         | any QR<br>(or any Q if *)<br>Ntchlnit40                                               | 1   | any Q<br>any Q                                                                        | 1   |
| V1 Post.*    | Init R ≥ 60 ms<br>Init R ≥ 15 mV<br>Init R ≥ 50 ms<br>Init R ≥ 10 mV                  | 2   | R ≥ 50 ms<br>R ≥ 1mV<br>R ≥ 40 ms<br>R ≥ 0.7 mV                                       | 2   | Init R ≥ 60 ms<br>Init R ≥ 15 mV<br>Init R ≥ 50 ms<br>Init R ≥ 10 mV                  | 2         | R ≥ 50 ms<br>R ≥ 1mV<br>R ≥ 40 ms<br>R ≥ 0.7 mV                                       | 2   | R ≥ 50 ms<br>R ≥ 1mV<br>R ≥ 40 ms<br>R ≥ 0.7 mV                                       | 2   |
| V2 Ant.      | Q ≥ 50 ms<br>any Q<br>R ≤ 10 ms<br>R ≤ 0.1 mV                                         | 2   | any QR<br>any QR<br>R ≤ 10 ms<br>R ≤ 0.1 mV                                           | 1   | Q ≥ 50 ms<br>any Q<br>R ≤ 10 ms<br>R ≤ 0.1 mV                                         | 2         | any QR<br>(or any Q if *)<br>Ntchlnit40                                               | 1   | any Q<br>R ≤ 10 ms<br>R ≤ 0.1 mV                                                      | 1   |
| V2 Post.*    | Init R ≥ 70 ms<br>Init R ≥ 2.5 mV<br>Init R ≥ 50 ms<br>Init R ≥ 2.0 mV                | 2   | R/S ≥ 15<br>R ≥ 60 ms<br>R ≥ 2 mV<br>R ≥ 50 ms<br>R ≥ 15 mV                           | 2   | Init R ≥ 70 ms<br>Init R ≥ 2.5 mV<br>Init R ≥ 50 ms<br>Init R ≥ 2.0 mV                | 2         | R/S ≥ 15<br>R ≥ 60 ms<br>R ≥ 2 mV<br>R ≥ 50 ms<br>R ≥ 15 mV                           | 2   | R/S ≥ 15<br>R ≥ 60 ms<br>R ≥ 2 mV<br>R ≥ 50 ms<br>R ≥ 15 mV                           | 2   |
| V3           | Q ≥ 30 ms<br>R ≤ 10 ms<br>Q ≥ 20 ms<br>R ≤ 20 ms                                      | 2   | Q ≥ 30 ms<br>R ≤ 10 ms<br>Q ≥ 20 ms<br>R ≤ 20 ms                                      | 2   | Q ≥ 30 ms<br>R ≤ 10 ms<br>Q ≥ 20 ms<br>R ≤ 20 ms                                      | 2         | QR& (Q ≥ 30 ms)<br>Ntchlnit40<br>any QR<br>(or any Q if *)                            | 1   | Q ≥ 30 ms<br>R ≤ 10 ms<br>Q ≥ 20 ms<br>R ≤ 20 ms                                      | 2   |
| V4           | Q ≥ 20 ms<br>R/Q ≤ 0.5<br>R/S ≤ 0.5<br>R/Q ≤ 1<br>R/S ≤ 1<br>R ≤ 0.5 mV<br>Ntchlnit40 | 1   | Q ≥ 20 ms<br>R/Q ≤ 0.5<br>R/S ≤ 0.5<br>R/Q ≤ 1<br>R/S ≤ 1<br>R ≤ 0.5 mV<br>Ntchlnit40 | 1   | Q ≥ 20 ms<br>R/Q ≤ 0.5<br>R/S ≤ 0.5<br>R/Q ≤ 1<br>R/S ≤ 1<br>R ≤ 0.5 mV<br>Ntchlnit40 | 1         | Q ≥ 20 ms<br>R/Q ≤ 0.5<br>R/S ≤ 0.5<br>R/Q ≤ 1<br>R/S ≤ 1<br>R ≤ 0.5 mV<br>Ntchlnit40 | 1   | Q ≥ 20 ms<br>R/Q ≤ 0.5<br>R/S ≤ 0.5<br>R/Q ≤ 1<br>R/S ≤ 1<br>R ≤ 0.5 mV<br>Ntchlnit40 | 1   |
| V5           | Q ≥ 30 ms<br>R/Q ≤ 1<br>R/S ≤ 1<br>R/Q ≤ 2<br>R/S ≤ 2<br>R ≤ 0.6 mV<br>Ntchlnit40     | 1   | Q ≥ 30 ms<br>R/Q ≤ 1<br>R/S ≤ 1<br>R/Q ≤ 2<br>R/S ≤ 2<br>R ≤ 0.6 mV<br>Ntchlnit40     | 1   | Q ≥ 30 ms<br>R/Q ≤ 1<br>R/S ≤ 1<br>R/Q ≤ 2<br>R/S ≤ 2<br>R ≤ 0.6 mV<br>Ntchlnit40     | 1         | Q ≥ 30 ms<br>R/Q ≤ 1<br>R/S ≤ 1<br>R/Q ≤ 2<br>R/S ≤ 2<br>R ≤ 0.6 mV<br>Ntchlnit40     | 1   | Q ≥ 30 ms<br>R/Q ≤ 1<br>R/S ≤ 1<br>R/Q ≤ 2<br>R/S ≤ 2<br>R ≤ 0.6 mV<br>Ntchlnit40     | 1   |
| V6           | Q ≥ 30 ms<br>R/Q ≤ 1<br>R/S ≤ 1<br>R/Q ≤ 3<br>R/S ≤ 3<br>R ≤ 0.6 mV<br>Ntchlnit40     | 1   | Q ≥ 30 ms<br>R/Q ≤ 1<br>R/S ≤ 1<br>R/Q ≤ 3<br>R/S ≤ 3<br>R ≤ 0.6 mV<br>Ntchlnit40     | 1   | Q ≥ 30 ms<br>R/Q ≤ 1<br>R/S ≤ 1<br>R/Q ≤ 3<br>R/S ≤ 3<br>R ≤ 0.6 mV<br>Ntchlnit40     | 1         | Q ≥ 30 ms<br>R/Q ≤ 1<br>R/S ≤ 1<br>R/Q ≤ 3<br>R/S ≤ 3<br>R ≤ 0.6 mV<br>Ntchlnit40     | 1   | Q ≥ 30 ms<br>R/Q ≤ 1<br>R/S ≤ 1<br>R/Q ≤ 3<br>R/S ≤ 3<br>R ≤ 0.6 mV<br>Ntchlnit40     | 1   |
| <b>Total</b> | Points                                                                                |     | Points                                                                                |     | Points                                                                                | <b>10</b> | Points                                                                                |     | Points                                                                                |     |

| Lead         | Criteria                                                         | Pts |
|--------------|------------------------------------------------------------------|-----|
| I            | any Q<br>R/Q ≤ 1<br>R/S ≤ 1<br>R/Q ≤ 15<br>R/S ≤ 15              | 1   |
| II           | Q ≥ 40 ms<br>Q ≥ 30 ms<br>R/Q ≤ 0.5<br>R/S ≤ 0.5                 | 2   |
| aVL          | Q ≥ 50 ms<br>Q ≥ 40 ms<br>R/S ≤ 0.5<br>R/Q ≤ 0.5                 | 2   |
| aVF          | Q ≥ 50 ms<br>Q ≥ 40 ms<br>R/Q ≤ 0.5<br>R/S ≤ 0.5                 | 2   |
| V1 Ant.***   | Ntchlnit40<br>R ≥ 0.3 mV<br>R ≥ 30 ms<br>R ≥ 0.2 mV<br>R ≥ 20 ms | 1   |
| V1 Post      | S/S' ≥ 2.0<br>S/S' ≥ 15<br>S/S' ≥ 125                            | 3   |
| V2 Ant.***   | Ntchlnit40<br>R ≥ 0.4 mV<br>R ≥ 30 ms<br>R ≥ 0.3 mV<br>R ≥ 20 ms | 1   |
| V2 Post      | S/S' ≥ 2.5<br>S/S' ≥ 2.0<br>S/S' ≥ 15                            | 3   |
| V5           | any Q<br>R/R' ≥ 2<br>R/R' ≥ 1<br>R/S ≤ 2<br>R ≤ 0.5 mV           | 1   |
| V6           | Q ≥ 20 ms<br>R/R' ≥ 2<br>R/R' ≥ 1<br>R/S ≤ 2<br>R ≤ 0.6 mV       | 1   |
| <b>Total</b> | Points                                                           |     |

%LV infarct (3 #pts) \_\_\_\_\_

%LV infarct (3 x#pts) \_\_\_\_\_ %LV infarct (3 x#pts) 30 %LV infarct (3 x#pts) \_\_\_\_\_ %LV infarct (3 x#pts) \_\_\_\_\_

\* (for LVH) if ≥ 4 other points in leads I, aVL, V4, V5 or V6 then count QS in V1+V3

\*\* (RAO) if P positive amp in V1 ≥ 0.1 mV or aVF P ≥ 0.175 mV, then exclude V1+V2 Post criteria

\*\*\* (RAO) if P positive amp in V1 ≥ 0.1 mV or aVF P ≥ 0.175 mV, then exclude V1+V2 R-criteria points

QRS Scoring

Patient ID 07 QRS duration 84ms Amplitude adjust -3%  
 (↑1%/yr age 20-54; ↓1%/yr >55 yrs; ↓ 10% for females)

Age & gender 48 Female QRS axis -19° Duration adjust -10% RAO(\*\*, \*\*\*)Yes(No)  
 (↓ 10% for females)

| Lead         | RBBB                                                                                  |                            | LAFB                                                                                  |                            | LAFB + RBBB                                                                           |                            | LVH                                                                                   |                            | No Confounders                                                                        |                            |
|--------------|---------------------------------------------------------------------------------------|----------------------------|---------------------------------------------------------------------------------------|----------------------------|---------------------------------------------------------------------------------------|----------------------------|---------------------------------------------------------------------------------------|----------------------------|---------------------------------------------------------------------------------------|----------------------------|
|              | Criteria                                                                              | Pts                        |
| I            | Q ≥ 30 ms<br>R/Q ≤ 1<br>R ≤ 0.2 mV                                                    | 1                          | Q ≥ 30 ms<br>R/Q ≤ 1<br>R ≤ 0.2 mV                                                    | 1                          | Q ≥ 30 ms<br>R/Q ≤ 1<br>R ≤ 0.2 mV                                                    | 1                          | Q ≥ 30 ms<br>R/Q ≤ 1<br>R ≤ 0.2 mV                                                    | 1                          | Q ≥ 30 ms<br>R/Q ≤ 1<br>R ≤ 0.2 mV                                                    | 1                          |
| II           | Q ≥ 40 ms<br>Q ≥ 30 ms                                                                | 2                          | Q ≥ 40 ms<br>Q ≥ 30 ms                                                                | 2                          | Q ≥ 40 ms<br>Q ≥ 30 ms                                                                | 2                          | Q ≥ 40 ms<br>Q ≥ 30 ms                                                                | 2                          | Q ≥ 40 ms<br>Q ≥ 30 ms                                                                | 2                          |
| aVL          | Q ≥ 30 ms<br>R/Q ≤ 1                                                                  | 1                          | Q ≥ 40 ms<br>R/Q ≤ 1                                                                  | 1                          | Q ≥ 40 ms<br>R/Q ≤ 1                                                                  | 1                          | Q ≥ 40 ms<br>R/Q ≤ 1                                                                  | 1                          | Q ≥ 30 ms<br>R/Q ≤ 1                                                                  | 1                          |
| aVF          | Q ≥ 50 ms<br>Q ≥ 40 ms<br>Q ≥ 30 ms<br>R/Q ≤ 1<br>R/Q ≤ 2                             | 3<br>2<br>2<br>2           | Q ≥ 50 ms<br>Q ≥ 40 ms<br>Q ≥ 30 ms<br>R/Q ≤ 1<br>R/Q ≤ 2                             | 3<br>2<br>1<br>2<br>1      | Q ≥ 50 ms<br>Q ≥ 40 ms<br>Q ≥ 30 ms<br>R/Q ≤ 1<br>R/Q ≤ 2                             | 3<br>2<br>1<br>2<br>1      | Q ≥ 60 ms<br>Q ≥ 50 ms<br>Q ≥ 40 ms<br>R/Q ≤ 1<br>R/Q ≤ 2                             | 3<br>2<br>1<br>2<br>1      | Q ≥ 50 ms<br>Q ≥ 40 ms<br>Q ≥ 30 ms<br>R/Q ≤ 1<br>R/Q ≤ 2                             | 3<br>2<br>1<br>2<br>1      |
| V1 Ant.      | Q ≥ 50 ms<br>any Q<br>Init R ≤ 20 ms                                                  | 2<br>1                     | any QR<br>any QR                                                                      | 1                          | any Q<br>any Q                                                                        | 1                          | any QR<br>(or any Q if *)<br>Ntchlnit40                                               | 1                          | any Q<br>any Q                                                                        | 1                          |
| V1 Post.**   | Init R ≥ 60 ms<br>Init R ≥ 15 mV<br>Init R ≥ 50 ms<br>Init R ≥ 10 mV                  | 2<br>1<br>1<br>1           | R/S ≥ 1<br>R ≥ 50 ms<br>R ≥ 1 mV<br>R ≥ 40 ms<br>R ≥ 0.7 mV                           | 1<br>2<br>1<br>1           | Init R ≥ 60 ms<br>Init R ≥ 15 mV<br>Init R ≥ 50 ms<br>Init R ≥ 10 mV                  | 2<br>1<br>1<br>1           | R/S ≥ 1<br>R ≥ 50 ms<br>R ≥ 1 mV<br>R ≥ 40 ms<br>R ≥ 0.7 mV                           | 1<br>2<br>1<br>1           | R/S ≥ 1<br>R ≥ 50 ms<br>R ≥ 1 mV<br>R ≥ 40 ms<br>R ≥ 0.7 mV                           | 1<br>2<br>1<br>1           |
| V2 Ant.      | Q ≥ 50 ms<br>any Q<br>R ≤ 10 ms<br>R ≤ 0.1 mV                                         | 2<br>1                     | any QR<br>any QR<br>R ≤ 10 ms<br>R ≤ 0.1 mV                                           | 1                          | any Q<br>any Q<br>R ≤ 10 ms<br>R ≤ 0.1 mV                                             | 1                          | any QR<br>(or any Q if *)<br>Ntchlnit40                                               | 1                          | any Q<br>any Q<br>R ≤ 10 ms<br>R ≤ 0.1 mV                                             | 1                          |
| V2 Post.**   | Init R ≥ 70 ms<br>Init R ≥ 2.5 mV<br>Init R ≥ 50 ms<br>Init R ≥ 2.0 mV                | 2<br>1<br>1<br>1           | R/S ≥ 15<br>R ≥ 60 ms<br>R ≥ 2 mV<br>R ≥ 50 ms<br>R ≥ 15 mV                           | 1<br>2<br>1<br>1           | Init R ≥ 70 ms<br>Init R ≥ 2.5 mV<br>Init R ≥ 50 ms<br>Init R ≥ 2.0 mV                | 2<br>1<br>1<br>1           | R/S ≥ 15<br>R ≥ 60 ms<br>R ≥ 2 mV<br>R ≥ 50 ms<br>R ≥ 15 mV                           | 1<br>2<br>1<br>1           | R/S ≥ 15<br>R ≥ 60 ms<br>R ≥ 2 mV<br>R ≥ 50 ms<br>R ≥ 15 mV                           | 1<br>2<br>1<br>1           |
| V3           | Q ≥ 30 ms<br>R ≤ 10 ms<br>Q ≥ 20 ms<br>R ≤ 20 ms                                      | 2<br>1<br>1<br>1           | Q ≥ 30 ms<br>R ≤ 10 ms<br>Q ≥ 20 ms<br>R ≤ 20 ms                                      | 2<br>1<br>1<br>1           | Q ≥ 30 ms<br>R ≤ 10 ms<br>Q ≥ 20 ms<br>R ≤ 20 ms                                      | 2<br>1<br>1<br>1           | QR& (Q ≥ 30 ms)<br>Ntchlnit40<br>any QR<br>(or any Q if *)                            | 2<br>1<br>1<br>1           | Q ≥ 30 ms<br>R ≤ 10 ms<br>Q ≥ 20 ms<br>R ≤ 20 ms                                      | 2<br>1<br>1<br>1           |
| V4           | Q ≥ 20 ms<br>R/Q ≤ 0.5<br>R/S ≤ 0.5<br>R/Q ≤ 1<br>R/S ≤ 1<br>R ≤ 0.5 mV<br>Ntchlnit40 | 1<br>2<br>1<br>1<br>1<br>1 | Q ≥ 20 ms<br>R/Q ≤ 0.5<br>R/S ≤ 0.5<br>R/Q ≤ 1<br>R/S ≤ 1<br>R ≤ 0.5 mV<br>Ntchlnit40 | 1<br>2<br>1<br>1<br>1<br>1 | Q ≥ 20 ms<br>R/Q ≤ 0.5<br>R/S ≤ 0.5<br>R/Q ≤ 1<br>R/S ≤ 1<br>R ≤ 0.5 mV<br>Ntchlnit40 | 1<br>2<br>1<br>1<br>1<br>1 | Q ≥ 20 ms<br>R/Q ≤ 0.5<br>R/S ≤ 0.5<br>R/Q ≤ 1<br>R/S ≤ 1<br>R ≤ 0.5 mV<br>Ntchlnit40 | 1<br>2<br>1<br>1<br>1<br>1 | Q ≥ 20 ms<br>R/Q ≤ 0.5<br>R/S ≤ 0.5<br>R/Q ≤ 1<br>R/S ≤ 1<br>R ≤ 0.5 mV<br>Ntchlnit40 | 1<br>2<br>1<br>1<br>1<br>1 |
| V5           | Q ≥ 30 ms<br>R/Q ≤ 1<br>R/S ≤ 1<br>R/Q ≤ 2<br>R/S ≤ 2<br>R ≤ 0.6 mV<br>Ntchlnit40     | 1<br>2<br>1<br>1<br>1<br>1 | Q ≥ 30 ms<br>R/Q ≤ 1<br>R/S ≤ 1<br>R/Q ≤ 2<br>R/S ≤ 15<br>R ≤ 0.6 mV<br>Ntchlnit40    | 1<br>2<br>1<br>1<br>1<br>1 | Q ≥ 30 ms<br>R/Q ≤ 1<br>R/S ≤ 1<br>R/Q ≤ 2<br>R/S ≤ 15<br>R ≤ 0.6 mV<br>Ntchlnit40    | 1<br>2<br>1<br>1<br>1<br>1 | Q ≥ 30 ms<br>R/Q ≤ 1<br>R/S ≤ 1<br>R/Q ≤ 2<br>R/S ≤ 2<br>R ≤ 0.6 mV<br>Ntchlnit40     | 1<br>2<br>1<br>1<br>1<br>1 | Q ≥ 30 ms<br>R/Q ≤ 1<br>R/S ≤ 1<br>R/Q ≤ 2<br>R/S ≤ 2<br>R ≤ 0.6 mV<br>Ntchlnit40     | 1<br>2<br>1<br>1<br>1<br>1 |
| V6           | Q ≥ 30 ms<br>R/Q ≤ 1<br>R/S ≤ 1<br>R/Q ≤ 3<br>R/S ≤ 3<br>R ≤ 0.6 mV<br>Ntchlnit40     | 1<br>2<br>1<br>1<br>1<br>1 | Q ≥ 30 ms<br>R/Q ≤ 1<br>R/S ≤ 1<br>R/Q ≤ 3<br>R/S ≤ 2<br>R ≤ 0.6 mV<br>Ntchlnit40     | 1<br>2<br>1<br>1<br>1<br>1 | Q ≥ 30 ms<br>R/Q ≤ 1<br>R/S ≤ 1<br>R/Q ≤ 3<br>R/S ≤ 2<br>R ≤ 0.6 mV<br>Ntchlnit40     | 1<br>2<br>1<br>1<br>1<br>1 | Q ≥ 30 ms<br>R/Q ≤ 1<br>R/S ≤ 1<br>R/Q ≤ 3<br>R/S ≤ 3<br>R ≤ 0.6 mV<br>Ntchlnit40     | 1<br>2<br>1<br>1<br>1<br>1 | Q ≥ 30 ms<br>R/Q ≤ 1<br>R/S ≤ 1<br>R/Q ≤ 3<br>R/S ≤ 3<br>R ≤ 0.6 mV<br>Ntchlnit40     | 1<br>2<br>1<br>1<br>1<br>1 |
| <b>Total</b> | Points                                                                                |                            | Points                                                                                |                            | Points                                                                                |                            | Points                                                                                | 0                          | Points                                                                                |                            |

| Lead         | Criteria                                                         | Pts                   |
|--------------|------------------------------------------------------------------|-----------------------|
| I            | any Q<br>R/Q ≤ 1<br>R/S ≤ 1<br>R/Q ≤ 15<br>R/S ≤ 15              | 1<br>2<br>1<br>1      |
| II           | Q ≥ 40 ms<br>Q ≥ 30 ms                                           | 2<br>1                |
| aVL          | Q ≥ 50 ms<br>Q ≥ 40 ms<br>R/S ≤ 0.5                              | 2<br>1<br>2           |
| aVF          | Q ≥ 50 ms<br>Q ≥ 40 ms<br>R/Q ≤ 0.5                              | 2<br>1<br>1           |
| V1 Ant.***   | Ntchlnit40<br>R ≥ 0.3 mV<br>R ≥ 30 ms<br>R ≥ 0.2 mV<br>R ≥ 20 ms | 1<br>2<br>1<br>1      |
| V1 Post      | S/S' ≥ 2.0<br>S/S' ≥ 15<br>S/S' ≥ 125                            | 3<br>2<br>1           |
| V2 Ant.***   | Ntchlnit40<br>R ≥ 0.4 mV<br>R ≥ 30 ms<br>R ≥ 0.3 mV<br>R ≥ 20 ms | 1<br>2<br>1<br>1      |
| V2 Post      | S/S' ≥ 2.5<br>S/S' ≥ 2.0<br>S/S' ≥ 15                            | 3<br>2<br>1           |
| V5           | any Q<br>R/R' ≥ 2<br>R/R' ≥ 1<br>R/S ≤ 2<br>R ≤ 0.5 mV           | 1<br>2<br>1<br>1<br>1 |
| V6           | Q ≥ 20 ms<br>R/R' ≥ 2<br>R/R' ≥ 1<br>R/S ≤ 2<br>R ≤ 0.6 mV       | 1<br>2<br>1<br>1<br>1 |
| <b>Total</b> | Points                                                           |                       |

%LV infarct \_\_\_\_\_  
 (3 #pts)

%LV infarct \_\_\_\_\_ %LV infarct \_\_\_\_\_ %LV infarct \_\_\_\_\_ %LV infarct \_\_\_\_\_ 0 %LV infarct \_\_\_\_\_  
 (3 x #pts) (3 x #pts) (3 x #pts) (3 x #pts) (3 x #pts)

\* (for LVH) if ≥ 4 other points in leads I, aVL, V4, V5 or V6 then count QS in V1+V3

\*\* (RAO) if P positive amp in V1 ≥ 0.1 mV or aVF P ≥ 0.175 mV, then exclude V1+V2 Post criteria

\*\*\* (RAO) if P positive amp in V1 ≥ 0.1 mV or aVF P ≥ 0.175 mV, then exclude V1+V2 R-criteria points

QRS Scoring

Patient ID 08 QRS duration 138ms Amplitude adjust -36%  
 (↑1%/yr age 20-54; ↓1%/yr >55 yrs; ↓ 10% for females)  
 Age & gender 81 Female QRS axis +2° Duration adjust -10% RAO(\*\*, \*\*\*)Yes/No  
 (↓ 10% for females)

|           | RBBB            |     | LAFB          |     | LAFB + RBBB     |     | LVH                    |     | No Confounders |     |
|-----------|-----------------|-----|---------------|-----|-----------------|-----|------------------------|-----|----------------|-----|
| Lead      | Criteria        | Pts | Criteria      | Pts | Criteria        | Pts | Criteria               | Pts | Criteria       | Pts |
| I         | Q ≥ 30 ms       | 1   | Q ≥ 30 ms     | 1   | Q ≥ 30 ms       | 1   | Q ≥ 30 ms              | 1   | Q ≥ 30 ms      | 1   |
|           | R/Q ≤ 1         | 1   | R/Q ≤ 1       | 1   | R/Q ≤ 1         | 1   | R/Q ≤ 1                | 1   | R/Q ≤ 1        | 1   |
| II        | R ≤ 0.2 mV      | 2   | R ≤ 0.2 mV    | 2   | R ≤ 0.2 mV      | 2   | R ≤ 0.2 mV             | 2   | R ≤ 0.2 mV     | 2   |
|           | Q ≥ 40 ms       | 2   | Q ≥ 40 ms     | 2   | Q ≥ 40 ms       | 2   | Q ≥ 40 ms              | 2   | Q ≥ 40 ms      | 2   |
| aVL       | Q ≥ 30 ms       | 1   | Q ≥ 30 ms     | 1   | Q ≥ 30 ms       | 1   | Q ≥ 30 ms              | 1   | Q ≥ 30 ms      | 1   |
|           | R/Q ≤ 1         | 1   | R/Q ≤ 1       | 1   | R/Q ≤ 1         | 1   | R/Q ≤ 1                | 1   | R/Q ≤ 1        | 1   |
| aVF       | Q ≥ 50 ms       | 3   | Q ≥ 50 ms     | 3   | Q ≥ 50 ms       | 3   | Q ≥ 50 ms              | 3   | Q ≥ 50 ms      | 3   |
|           | Q ≥ 40 ms       | 2   | Q ≥ 40 ms     | 2   | Q ≥ 40 ms       | 2   | Q ≥ 40 ms              | 2   | Q ≥ 40 ms      | 2   |
| V1        | Q ≥ 30 ms       | 1   | Q ≥ 30 ms     | 1   | Q ≥ 30 ms       | 1   | Q ≥ 30 ms              | 1   | Q ≥ 30 ms      | 1   |
|           | R/Q ≤ 1         | 2   | R/Q ≤ 1       | 2   | R/Q ≤ 1         | 2   | R/Q ≤ 1                | 2   | R/Q ≤ 1        | 2   |
| Ant.      | R/Q ≤ 2         | 1   | R/Q ≤ 2       | 1   | R/Q ≤ 2         | 1   | R/Q ≤ 2                | 1   | R/Q ≤ 2        | 1   |
|           | any Q           | 1   | any QR        | 1   | any Q           | 1   | any QR (or any Q if *) | 1   | any Q          | 1   |
| V1 Post.* | Init R ≥ 60 ms  | 2   | R/S ≥ 1       | 1   | Init R ≥ 60 ms  | 2   | R/S ≥ 1                | 1   | R/S ≥ 1        | 1   |
|           | Init R ≥ 15 mV  | 1   | R ≥ 1 mV      | 1   | Init R ≥ 15 mV  | 1   | R ≥ 1 mV               | 1   | R ≥ 1 mV       | 1   |
| V2        | Init R ≥ 50 ms  | 1   | R ≥ 40 ms     | 1   | Init R ≥ 50 ms  | 1   | R ≥ 40 ms              | 1   | R ≥ 40 ms      | 1   |
|           | Init R ≥ 10 mV  | 1   | R ≥ 0.7 mV    | 1   | Init R ≥ 10 mV  | 1   | R ≥ 0.7 mV             | 1   | R ≥ 0.7 mV     | 1   |
| Ant.      | Q ≥ 50 ms       | 2   | Qs0.2&Ss0.2mV | 1   | Q ≥ 50 ms       | 2   | Qs0.2&Ss0.2 mV         | 1   | Qs0.2&Ss0.2 mV | 1   |
|           | any Q           | 1   | any QR        | 1   | any Q           | 1   | any QR (or any Q if *) | 1   | any Q          | 1   |
| V2 Post.* | R ≤ 10 ms       | 1   | R ≤ 10 ms     | 1   | R ≤ 10 ms       | 1   | R ≤ 10 ms              | 1   | R ≤ 10 ms      | 1   |
|           | R ≤ 0.1 mV      | 1   | R ≤ 0.1 mV    | 1   | R ≤ 0.1 mV      | 1   | R ≤ 0.1 mV             | 1   | R ≤ 0.1 mV     | 1   |
| Ant.      | Init R ≥ 70 ms  | 2   | R/S ≥ 15      | 1   | Init R ≥ 70 ms  | 2   | R/S ≥ 15               | 1   | R/S ≥ 15       | 1   |
|           | Init R ≥ 2.5 mV | 1   | R ≥ 2 mV      | 1   | Init R ≥ 2.5 mV | 1   | R ≥ 2 mV               | 1   | R ≥ 2 mV       | 1   |
| V3        | Init R ≥ 50 ms  | 1   | R ≥ 50 ms     | 1   | Init R ≥ 50 ms  | 1   | R ≥ 50 ms              | 1   | R ≥ 50 ms      | 1   |
|           | Init R ≥ 2.0 mV | 1   | R ≥ 15 mV     | 1   | Init R ≥ 2.0 mV | 1   | R ≥ 15 mV              | 1   | R ≥ 15 mV      | 1   |
| Post.     | Qs0.3&Ss0.3mV   | 1   | Qs0.3&Ss0.3mV | 1   | Qs0.3&Ss0.3mV   | 1   | Qs0.3&Ss0.3mV          | 1   | Qs0.3&Ss0.3mV  | 1   |
|           | Q ≥ 30 ms       | 2   | Q ≥ 30 ms     | 2   | Q ≥ 30 ms       | 2   | Q ≥ 30 ms              | 2   | Q ≥ 30 ms      | 2   |
| V4        | R ≤ 10 ms       | 1   | R ≤ 10 ms     | 1   | R ≤ 10 ms       | 1   | R ≤ 10 ms              | 1   | R ≤ 10 ms      | 1   |
|           | Q ≥ 20 ms       | 1   | Q ≥ 20 ms     | 1   | Q ≥ 20 ms       | 1   | Q ≥ 20 ms              | 1   | Q ≥ 20 ms      | 1   |
| Post.     | R ≤ 20 ms       | 1   | R ≤ 20 ms     | 1   | R ≤ 20 ms       | 1   | R ≤ 20 ms              | 1   | R ≤ 20 ms      | 1   |
|           | Q ≥ 20 ms       | 1   | Q ≥ 20 ms     | 1   | Q ≥ 20 ms       | 1   | Q ≥ 20 ms              | 1   | Q ≥ 20 ms      | 1   |
| V5        | R/Q ≤ 0.5       | 2   | R/Q ≤ 0.5     | 2   | R/Q ≤ 0.5       | 2   | R/Q ≤ 0.5              | 2   | R/Q ≤ 0.5      | 2   |
|           | R/S ≤ 1         | 1   | R/S ≤ 1       | 1   | R/S ≤ 1         | 1   | R/S ≤ 1                | 1   | R/S ≤ 1        | 1   |
| Ant.      | R/S ≤ 1         | 1   | R/S ≤ 1       | 1   | R/S ≤ 1         | 1   | R/S ≤ 1                | 1   | R/S ≤ 1        | 1   |
|           | R ≤ 0.5 mV      | 1   | R ≤ 0.5 mV    | 1   | R ≤ 0.5 mV      | 1   | R ≤ 0.5 mV             | 1   | R ≤ 0.5 mV     | 1   |
| V6        | Q ≥ 30 ms       | 1   | Q ≥ 30 ms     | 1   | Q ≥ 30 ms       | 1   | Q ≥ 30 ms              | 1   | Q ≥ 30 ms      | 1   |
|           | R/Q ≤ 1         | 2   | R/Q ≤ 1       | 2   | R/Q ≤ 1         | 2   | R/Q ≤ 1                | 2   | R/Q ≤ 1        | 2   |
| Ant.      | R/S ≤ 1         | 1   | R/S ≤ 1       | 1   | R/S ≤ 1         | 1   | R/S ≤ 1                | 1   | R/S ≤ 1        | 1   |
|           | R/Q ≤ 2         | 1   | R/Q ≤ 2       | 1   | R/Q ≤ 2         | 1   | R/Q ≤ 2                | 1   | R/Q ≤ 2        | 1   |
| V6        | R/S ≤ 2         | 1   | R/S ≤ 15      | 1   | R/S ≤ 2         | 1   | R/S ≤ 2                | 1   | R/S ≤ 2        | 1   |
|           | R ≤ 0.6 mV      | 1   | R ≤ 0.6 mV    | 1   | R ≤ 0.6 mV      | 1   | R ≤ 0.6 mV             | 1   | R ≤ 0.6 mV     | 1   |
| Total     | Q ≥ 30 ms       | 1   | Q ≥ 30 ms     | 1   | Q ≥ 30 ms       | 1   | Q ≥ 30 ms              | 1   | Q ≥ 30 ms      | 1   |
|           | R/Q ≤ 1         | 2   | R/Q ≤ 1       | 2   | R/Q ≤ 1         | 2   | R/Q ≤ 1                | 2   | R/Q ≤ 1        | 2   |
| Total     | R/S ≤ 1         | 1   | R/S ≤ 1       | 1   | R/S ≤ 1         | 1   | R/S ≤ 1                | 1   | R/S ≤ 1        | 1   |
|           | R/Q ≤ 3         | 1   | R/Q ≤ 3       | 1   | R/Q ≤ 3         | 1   | R/Q ≤ 3                | 1   | R/Q ≤ 3        | 1   |
| Total     | R/S ≤ 3         | 1   | R/S ≤ 2       | 1   | R/S ≤ 3         | 1   | R/S ≤ 3                | 1   | R/S ≤ 3        | 1   |
|           | R ≤ 0.6 mV      | 1   | R ≤ 0.6 mV    | 1   | R ≤ 0.6 mV      | 1   | R ≤ 0.6 mV             | 1   | R ≤ 0.6 mV     | 1   |
| Total     | Points          |     | Points        |     | Points          |     | Points                 |     | Points         |     |

| LBBB     |            |     |
|----------|------------|-----|
| Lead     | Criteria   | Pts |
| I        | any Q      | 1   |
|          | R/Q ≤ 1    | 2   |
| II       | R/S ≤ 1    | 1   |
|          | R/Q ≤ 15   | 1   |
| aVL      | R/S ≤ 15   | 1   |
|          | Q ≥ 40 ms  | 2   |
| aVF      | Q ≥ 30 ms  | 1   |
|          | R/Q ≤ 0.5  | 1   |
| V1       | R/S ≤ 0.5  | 2   |
|          | R/Q ≤ 0.5  | 1   |
| Ant.     | R/S ≤ 1    | 1   |
|          | R/Q ≤ 1    | 1   |
| V1 Post. | Q ≥ 50 ms  | 2   |
|          | Q ≥ 40 ms  | 1   |
| Ant.     | R/Q ≤ 0.5  | 1   |
|          | R/S ≤ 0.5  | 1   |
| V2       | Nchlnit40  | 1   |
|          | R ≥ 0.3 mV | 2   |
| Ant.     | R ≥ 30 ms  | 1   |
|          | R ≥ 0.2 mV | 1   |
| V1 Post. | R ≥ 20 ms  | 1   |
|          | S/S' ≥ 2.0 | 3   |
| Ant.     | S/S' ≥ 15  | 2   |
|          | S/S' ≥ 125 | 1   |
| V2       | Nchlnit40  | 1   |
|          | R ≥ 0.4 mV | 2   |
| Ant.     | R ≥ 30 ms  | 1   |
|          | R ≥ 0.3 mV | 1   |
| V2       | R ≥ 20 ms  | 1   |
|          | S/S' ≥ 2.5 | 3   |
| Post.    | S/S' ≥ 2.0 | 2   |
|          | S/S' ≥ 15  | 1   |
| V5       | any Q      | 1   |
|          | R/R' ≥ 2   | 2   |
| Ant.     | R/R' ≥ 1   | 1   |
|          | R/S ≤ 2    | 1   |
| V6       | R ≤ 0.5 mV | 1   |
|          | R ≤ 0.5 mV | 1   |
| Ant.     | R/R' ≥ 2   | 2   |
|          | R/R' ≥ 1   | 1   |
| Total    | R/S ≤ 2    | 1   |
|          | R ≤ 0.6 mV | 1   |
| Total    | Points     | 2   |

%LV infarct 6  
(3 #pts)

%LV infarct (3 x #pts) — %LV infarct (3 x #pts) —

\* (for LVH) if ≥ 4 other points in leads I, aVL, V4, V5 or V6 then count QS in V1+V3  
 \*\* (RAO) if P positive amp in V1 ≥ 0.1 mV or aVF P ≥ 0.175 mV, then exclude V1+V2 Post criteria  
 \*\*\* (RAO) if P positive amp in V1 ≥ 0.1 mV or aVF P ≥ 0.175 mV, then exclude V1+V2 R-criteria points



QRS Scoring

Patient ID 09 QRS duration 110ms Amplitude adjust +25%  
 (↑1%/yr age 20-54; ↓1%/yr >55 yrs; ↓ 10% for females)  
 Age & gender 30 Male QRS axis +73° Duration adjust 0% RAO(\*\*, \*\*\*)Yes/No (No)  
 (↓ 10% for females)

| Lead       | RBBB            |     | LAFB          |     | LAFB + RBBB     |     | LVH           |     | No Confounders |     |
|------------|-----------------|-----|---------------|-----|-----------------|-----|---------------|-----|----------------|-----|
|            | Criteria        | Pts | Criteria      | Pts | Criteria        | Pts | Criteria      | Pts | Criteria       | Pts |
| I          | Q ≥ 30 ms       | 1   | Q ≥ 30 ms     | 1   | Q ≥ 30 ms       | 1   | Q ≥ 30 ms     | 1   | Q ≥ 30 ms      | 1   |
|            | R/Q ≤ 1         | 1   | R/Q ≤ 1       | 1   | R/Q ≤ 1         | 1   | R/Q ≤ 1       | 1   | R/Q ≤ 1        | 1   |
| II         | R ≤ 0.2 mV      | 1   | R ≤ 0.2 mV    | 1   | R ≤ 0.2 mV      | 1   | R ≤ 0.2 mV    | 1   | R ≤ 0.2 mV     | 1   |
|            | Q ≥ 40 ms       | 2   | Q ≥ 40 ms     | 2   | Q ≥ 40 ms       | 2   | Q ≥ 40 ms     | 2   | Q ≥ 40 ms      | 2   |
| aVL        | Q ≥ 30 ms       | 1   | Q ≥ 30 ms     | 1   | Q ≥ 30 ms       | 1   | Q ≥ 30 ms     | 1   | Q ≥ 30 ms      | 1   |
|            | R/Q ≤ 1         | 1   | R/Q ≤ 1       | 1   | R/Q ≤ 1         | 1   | R/Q ≤ 1       | 1   | R/Q ≤ 1        | 1   |
| aVF        | Q ≥ 50 ms       | 3   | Q ≥ 50 ms     | 3   | Q ≥ 50 ms       | 3   | Q ≥ 50 ms     | 3   | Q ≥ 50 ms      | 3   |
|            | Q ≥ 40 ms       | 2   | Q ≥ 40 ms     | 2   | Q ≥ 40 ms       | 2   | Q ≥ 40 ms     | 2   | Q ≥ 40 ms      | 2   |
| V1         | Q ≥ 30 ms       | 1   | Q ≥ 30 ms     | 1   | Q ≥ 30 ms       | 1   | Q ≥ 30 ms     | 1   | Q ≥ 30 ms      | 1   |
|            | R/Q ≤ 1         | 2   | R/Q ≤ 1       | 2   | R/Q ≤ 1         | 2   | R/Q ≤ 1       | 2   | R/Q ≤ 1        | 2   |
| Ant.       | R/Q ≤ 2         | 1   | R/Q ≤ 2       | 1   | R/Q ≤ 2         | 1   | R/Q ≤ 2       | 1   | R/Q ≤ 2        | 1   |
|            | Q ≥ 50 ms       | 2   | any QR        | 1   | any QR          | 1   | any QR        | 1   | any QR         | 1   |
| V1 Post.*  | any Q           | 1   | any QR        | 1   | any Q           | 1   | any QR        | 1   | any Q          | 1   |
|            | Init R ≥ 60 ms  | 2   | R/S ≥ 1       | 1   | Init R ≥ 60 ms  | 2   | R/S ≥ 1       | 1   | R/S ≥ 1        | 1   |
| V2         | Init R ≥ 15 mV  | 1   | R ≥ 50 ms     | 2   | Init R ≥ 15 mV  | 1   | R ≥ 50 ms     | 2   | R ≥ 50 ms      | 2   |
|            | Init R ≥ 50 ms  | 1   | R ≥ 40 ms     | 1   | Init R ≥ 50 ms  | 1   | R ≥ 40 ms     | 1   | R ≥ 40 ms      | 1   |
| V2 Ant.*** | Init R ≥ 10 mV  | 1   | R ≥ 0.7 mV    | 1   | Init R ≥ 10 mV  | 1   | R ≥ 0.7 mV    | 1   | R ≥ 0.7 mV     | 1   |
|            | Q ≥ 50 ms       | 2   | Qs0.2&S≤0.2mV | 1   | Q ≥ 50 ms       | 2   | Qs0.2&S≤0.2mV | 1   | Qs0.2&S≤0.2mV  | 1   |
| V2 Post.*  | any Q           | 1   | any QR        | 1   | any Q           | 1   | any QR        | 1   | any Q          | 1   |
|            | R ≤ 10 ms       | 1   | R ≤ 10 ms     | 1   | R ≤ 10 ms       | 1   | R ≤ 10 ms     | 1   | R ≤ 10 ms      | 1   |
| V2 Ant.*** | R ≤ 0.1 mV      | 1   | R ≤ 0.1 mV    | 1   | R ≤ 0.1 mV      | 1   | R ≤ 0.1 mV    | 1   | R ≤ 0.1 mV     | 1   |
|            | Init R ≥ 70 ms  | 2   | R ≥ 60 ms     | 2   | Init R ≥ 70 ms  | 2   | R ≥ 60 ms     | 2   | R ≥ 60 ms      | 2   |
| V3         | Init R ≥ 2.5 mV | 1   | R ≥ 2 mV      | 1   | Init R ≥ 2.5 mV | 1   | R ≥ 2 mV      | 1   | R ≥ 2 mV       | 1   |
|            | Init R ≥ 2.0 mV | 1   | R ≥ 15 mV     | 1   | Init R ≥ 2.0 mV | 1   | R ≥ 15 mV     | 1   | R ≥ 15 mV      | 1   |
| V3 Post.*  | Qs0.3&S≤0.3mV   | 1   | Qs0.3&S≤0.3mV | 1   | Qs0.3&S≤0.3mV   | 1   | Qs0.3&S≤0.3mV | 1   | Qs0.3&S≤0.3mV  | 1   |
|            | Q ≥ 30 ms       | 2   | Q ≥ 30 ms     | 2   | Q ≥ 30 ms       | 2   | Q ≥ 30 ms     | 2   | Q ≥ 30 ms      | 2   |
| V4         | R ≤ 10 ms       | 1   | R ≤ 10 ms     | 1   | R ≤ 10 ms       | 1   | R ≤ 10 ms     | 1   | R ≤ 10 ms      | 1   |
|            | Q ≥ 20 ms       | 1   | Q ≥ 20 ms     | 1   | Q ≥ 20 ms       | 1   | Q ≥ 20 ms     | 1   | Q ≥ 20 ms      | 1   |
| V4 Post.*  | R ≤ 20 ms       | 1   | R ≤ 20 ms     | 1   | R ≤ 20 ms       | 1   | R ≤ 20 ms     | 1   | R ≤ 20 ms      | 1   |
|            | Q ≥ 20 ms       | 1   | Q ≥ 20 ms     | 1   | Q ≥ 20 ms       | 1   | Q ≥ 20 ms     | 1   | Q ≥ 20 ms      | 1   |
| V5         | R/Q ≤ 0.5       | 2   | R/Q ≤ 0.5     | 2   | R/Q ≤ 0.5       | 2   | R/Q ≤ 0.5     | 2   | R/Q ≤ 0.5      | 2   |
|            | R/S ≤ 0.5       | 1   | R/S ≤ 0.5     | 1   | R/S ≤ 0.5       | 1   | R/S ≤ 0.5     | 1   | R/S ≤ 0.5      | 1   |
| V5 Post.*  | R/Q ≤ 1         | 1   | R/Q ≤ 1       | 1   | R/Q ≤ 1         | 1   | R/Q ≤ 1       | 1   | R/Q ≤ 1        | 1   |
|            | R/S ≤ 1         | 1   | R/S ≤ 1       | 1   | R/S ≤ 1         | 1   | R/S ≤ 1       | 1   | R/S ≤ 1        | 1   |
| V6         | R/Q ≤ 2         | 1   | R/Q ≤ 2       | 1   | R/Q ≤ 2         | 1   | R/Q ≤ 2       | 1   | R/Q ≤ 2        | 1   |
|            | R/S ≤ 2         | 1   | R/S ≤ 2       | 1   | R/S ≤ 2         | 1   | R/S ≤ 2       | 1   | R/S ≤ 2        | 1   |
| V6 Post.*  | R ≤ 0.6 mV      | 1   | R ≤ 0.6 mV    | 1   | R ≤ 0.6 mV      | 1   | R ≤ 0.6 mV    | 1   | R ≤ 0.6 mV     | 1   |
|            | Q ≥ 30 ms       | 1   | Q ≥ 30 ms     | 1   | Q ≥ 30 ms       | 1   | Q ≥ 30 ms     | 1   | Q ≥ 30 ms      | 1   |
| Total      | R/Q ≤ 1         | 2   | R/Q ≤ 1       | 2   | R/Q ≤ 1         | 2   | R/Q ≤ 1       | 2   | R/Q ≤ 1        | 2   |
|            | R/S ≤ 1         | 1   | R/S ≤ 1       | 1   | R/S ≤ 1         | 1   | R/S ≤ 1       | 1   | R/S ≤ 1        | 1   |
| Total      | R/Q ≤ 3         | 1   | R/Q ≤ 3       | 1   | R/Q ≤ 3         | 1   | R/Q ≤ 3       | 1   | R/Q ≤ 3        | 1   |
|            | R/S ≤ 3         | 1   | R/S ≤ 3       | 1   | R/S ≤ 3         | 1   | R/S ≤ 3       | 1   | R/S ≤ 3        | 1   |
| Total      | R ≤ 0.6 mV      | 1   | R ≤ 0.6 mV    | 1   | R ≤ 0.6 mV      | 1   | R ≤ 0.6 mV    | 1   | R ≤ 0.6 mV     | 1   |
|            | Ntchlnit40      | 1   | Ntchlnit40    | 1   | Ntchlnit40      | 1   | Ntchlnit40    | 1   | Ntchlnit40     | 1   |
| Total      | Points          |     | Points        |     | Points          |     | Points        | 6   | Points         |     |

| Lead       | Criteria   | Pts |
|------------|------------|-----|
| I          | any Q      | 1   |
|            | R/Q ≤ 1    | 2   |
| II         | R/S ≤ 1    | 1   |
|            | R/Q ≤ 15   | 1   |
| aVL        | R/S ≤ 15   | 1   |
|            | Q ≥ 40 ms  | 2   |
| aVF        | Q ≥ 30 ms  | 1   |
|            | R/Q ≤ 0.5  | 1   |
| V1         | R/S ≤ 0.5  | 1   |
|            | R/Q ≤ 0.5  | 2   |
| Ant.***    | R/S ≤ 1    | 1   |
|            | R/Q ≤ 1    | 1   |
| V1 Post.*  | Q ≥ 50 ms  | 2   |
|            | Q ≥ 40 ms  | 1   |
| V2         | R/Q ≤ 0.5  | 1   |
|            | R/S ≤ 0.5  | 1   |
| V2 Ant.*** | R/S ≤ 0.5  | 1   |
|            | Ntchlnit40 | 1   |
| V2 Post.*  | R ≥ 0.3 mV | 2   |
|            | R ≥ 30 ms  | 1   |
| V3         | R ≥ 0.2 mV | 1   |
|            | R ≥ 20 ms  | 1   |
| V3 Ant.*** | S/S' ≥ 2.0 | 3   |
|            | S/S' ≥ 15  | 2   |
| V3 Post.*  | S/S' ≥ 125 | 1   |
|            | Ntchlnit40 | 1   |
| V4         | R ≥ 0.4 mV | 2   |
|            | R ≥ 30 ms  | 1   |
| V4 Ant.*** | R ≥ 0.3 mV | 1   |
|            | R ≥ 20 ms  | 1   |
| V4 Post.*  | S/S' ≥ 2.5 | 3   |
|            | S/S' ≥ 2.0 | 2   |
| V5         | S/S' ≥ 15  | 1   |
|            | any Q      | 1   |
| V5 Ant.*** | any Q      | 1   |
|            | R/R' ≥ 2   | 2   |
| V5 Post.*  | R/R' ≥ 1   | 1   |
|            | R/S ≤ 2    | 1   |
| V6         | R ≤ 0.5 mV | 1   |
|            | Q ≥ 20 ms  | 1   |
| V6 Ant.*** | Q ≥ 20 ms  | 1   |
|            | R/R' ≥ 2   | 2   |
| V6 Post.*  | R/R' ≥ 1   | 1   |
|            | R/S ≤ 2    | 1   |
| Total      | Points     |     |

%LV infarct           
 (3 #pts)

%LV infarct          %LV infarct          %LV infarct          %LV infarct 18 %LV infarct           
 (3 x #pts) (3 x #pts) (3 x #pts) (3 x #pts) (3 x #pts)

\* (for LVH) if ≥ 4 other points in leads I, aVL, V4, V5 or V6 then count QS in V1+V3

\*\* (RAO) if P positive amp in V1 ≥ 0.1mV or aVF P ≥ 0.175 mV, then exclude V1+V2 Post criteria

\*\*\* (RAO) if P positive amp in V1 ≥ 0.1mV or aVF P ≥ 0.175 mV, then exclude V1+V2 R-criteria points

QRS Scoring

Patient ID 10 QRS duration 152ms Amplitude adjust -14%  
 (↑1%/yr age 20-54; ↓1%/yr >55 yrs; ↓ 10% for females)  
 Age & gender 69 Male QRS axis -64° Duration adjust 0% RAO(\*\*, \*\*\*)Yes/No  
 (↓ 10% for females)

| Lead      | RBBB            |     | LAFB          |     | LAFB + RBBB     |     | LVH                    |     | No Confounders         |     |
|-----------|-----------------|-----|---------------|-----|-----------------|-----|------------------------|-----|------------------------|-----|
|           | Criteria        | Pts | Criteria      | Pts | Criteria        | Pts | Criteria               | Pts | Criteria               | Pts |
| I         | Q ≥ 30 ms       | 1   | Q ≥ 30 ms     | 1   | Q ≥ 30 ms       | 1   | Q ≥ 30 ms              | 1   | Q ≥ 30 ms              | 1   |
|           | R/Q ≤ 1         | 1   | R/Q ≤ 1       | 1   | R/Q ≤ 1         | 1   | R/Q ≤ 1                | 1   | R/Q ≤ 1                | 1   |
| II        | R ≤ 0.2 mV      | 1   | R ≤ 0.2 mV    | 1   | R ≤ 0.2 mV      | 1   | R ≤ 0.2 mV             | 1   | R ≤ 0.2 mV             | 1   |
|           | Q ≥ 40 ms       | 2   | Q ≥ 40 ms     | 2   | Q ≥ 40 ms       | 2   | Q ≥ 40 ms              | 2   | Q ≥ 40 ms              | 2   |
| aVL       | Q ≥ 30 ms       | 1   | Q ≥ 30 ms     | 1   | Q ≥ 30 ms       | 1   | Q ≥ 30 ms              | 1   | Q ≥ 30 ms              | 1   |
|           | R/Q ≤ 1         | 1   | R/Q ≤ 1       | 1   | R/Q ≤ 1         | 1   | R/Q ≤ 1                | 1   | R/Q ≤ 1                | 1   |
| aVF       | Q ≥ 50 ms       | 3   | Q ≥ 50 ms     | 3   | Q ≥ 50 ms       | 3   | Q ≥ 60 ms              | 3   | Q ≥ 50 ms              | 3   |
|           | Q ≥ 40 ms       | 2   | Q ≥ 40 ms     | 2   | Q ≥ 40 ms       | 2   | Q ≥ 50 ms              | 2   | Q ≥ 40 ms              | 2   |
| V1        | Q ≥ 30 ms       | 1   | Q ≥ 30 ms     | 1   | Q ≥ 30 ms       | 1   | Q ≥ 40 ms              | 1   | Q ≥ 30 ms              | 1   |
|           | R/Q ≤ 1         | 1   | R/Q ≤ 1       | 1   | R/Q ≤ 1         | 1   | R/Q ≤ 1                | 1   | R/Q ≤ 1                | 1   |
| Ant.      | any Q           | 1   | any QR        | 1   | any Q           | 1   | any QR (or any Q if *) | 1   | any Q                  | 1   |
|           | Init R ≤ 20 ms  | 1   |               |     |                 |     | Ntchlnit40             |     |                        |     |
| V1 Post.* | Init R ≥ 60 ms  | 2   | R/S ≥ 1       | 1   | Init R ≥ 60 ms  | 2   | R/S ≥ 1                | 1   | R/S ≥ 1                | 1   |
|           | Init R ≥ 15 mV  | 1   | R ≥ 50 ms     | 2   | Init R ≥ 15 mV  | 1   | R ≥ 50 ms              | 2   | R ≥ 50 ms              | 2   |
| V2        | Init R ≥ 50 ms  | 1   | R ≥ 40 ms     | 1   | Init R ≥ 50 ms  | 1   | R ≥ 40 ms              | 1   | R ≥ 40 ms              | 1   |
|           | Init R ≥ 10 mV  | 1   | R ≥ 0.7 mV    | 1   | Init R ≥ 10 mV  | 1   | R ≥ 0.7 mV             | 1   | R ≥ 0.7 mV             | 1   |
| Ant.      | Q ≥ 50 ms       | 2   | Qs0.2&S≤0.2mV | 1   | Q ≥ 50 ms       | 2   | Qs0.2&S≤0.2 mV         | 1   | Qs0.2&S≤0.2mV          | 1   |
|           | any Q           | 1   | any QR        | 1   | any Q           | 1   | any QR (or any Q if *) | 1   | any Q                  | 1   |
| V2 Post.* | R ≤ 10 ms       | 1   | R ≤ 10 ms     | 1   | R ≤ 10 ms       | 1   | R ≤ 10 ms              | 1   | R ≤ 10 ms              | 1   |
|           | R ≤ 0.1 mV      | 1   | R ≤ 0.1 mV    | 1   | R ≤ 0.1 mV      | 1   | R ≤ 0.1 mV             | 1   | R ≤ 0.1 mV             | 1   |
| V2 Ant.** | Init R ≥ 70 ms  | 2   | R/S ≥ 15      | 1   | Init R ≥ 70 ms  | 2   | R/S ≥ 15               | 1   | R/S ≥ 15               | 1   |
|           | Init R ≥ 2.5 mV | 1   | R ≥ 60 ms     | 2   | Init R ≥ 2.5 mV | 1   | R ≥ 60 ms              | 2   | R ≥ 60 ms              | 2   |
| V3        | Init R ≥ 50 ms  | 1   | R ≥ 50 ms     | 1   | Init R ≥ 50 ms  | 1   | R ≥ 50 ms              | 1   | R ≥ 50 ms              | 1   |
|           | Init R ≥ 2.0 mV | 1   | R ≥ 15 mV     | 1   | Init R ≥ 2.0 mV | 1   | R ≥ 15 mV              | 1   | R ≥ 15 mV              | 1   |
| V3 Ant.   | Q ≥ 30 ms       | 2   | Q ≥ 30 ms     | 2   | Q ≥ 30 ms       | 2   | Qs0.3&S≤0.3mV          | 1   | Qs0.3&S≤0.3mV          | 1   |
|           | R ≤ 10 ms       | 1   | R ≤ 10 ms     | 1   | R ≤ 10 ms       | 1   | QR& (Q ≥ 30 ms)        | 2   | QR& (Q ≥ 30 ms)        | 2   |
| V4        | Q ≥ 20 ms       | 1   | Q ≥ 20 ms     | 1   | Q ≥ 20 ms       | 1   | Ntchlnit40             | 1   | Ntchlnit40             | 1   |
|           | R/Q ≤ 0.5       | 2   | R/Q ≤ 0.5     | 2   | R/Q ≤ 0.5       | 2   | any QR (or any Q if *) | 1   | any QR (or any Q if *) | 1   |
| V4 Ant.   | R/S ≤ 0.5       | 1   | R/S ≤ 0.5     | 1   | R/S ≤ 0.5       | 1   | R/S ≤ 0.5              | 1   | R/S ≤ 0.5              | 1   |
|           | R/Q ≤ 1         | 1   | R/Q ≤ 1       | 1   | R/Q ≤ 1         | 1   | R/Q ≤ 1                | 1   | R/Q ≤ 1                | 1   |
| V5        | R/S ≤ 1         | 1   | R/S ≤ 1       | 1   | R/S ≤ 1         | 1   | R/S ≤ 1                | 1   | R/S ≤ 1                | 1   |
|           | R/Q ≤ 2         | 1   | R/Q ≤ 2       | 1   | R/Q ≤ 2         | 1   | R/S ≤ 1                | 1   | R/S ≤ 1                | 1   |
| V5 Ant.   | R/S ≤ 2         | 1   | R/S ≤ 15      | 1   | R/S ≤ 15        | 1   | R/S ≤ 2                | 1   | R/S ≤ 2                | 1   |
|           | R ≤ 0.6 mV      | 1   | R ≤ 0.6 mV    | 1   | R ≤ 0.6 mV      | 1   | R/S ≤ 1                | 1   | R/S ≤ 1                | 1   |
| V6        | Q ≥ 30 ms       | 1   | Q ≥ 30 ms     | 1   | Q ≥ 30 ms       | 1   | Q ≥ 30 ms              | 1   | Q ≥ 30 ms              | 1   |
|           | R/Q ≤ 1         | 2   | R/Q ≤ 1       | 2   | R/Q ≤ 1         | 2   | Q ≥ 20 ms              | 1   | Q ≥ 20 ms              | 1   |
| V6 Ant.   | R/S ≤ 1         | 1   | R/S ≤ 1       | 1   | R/S ≤ 1         | 1   | R/Q ≤ 0.5              | 2   | R/Q ≤ 0.5              | 2   |
|           | R/Q ≤ 3         | 1   | R/Q ≤ 3       | 1   | R/Q ≤ 3         | 1   | R/S ≤ 0.5              | 1   | R/S ≤ 0.5              | 1   |
| V6 Post.  | R/S ≤ 3         | 1   | R/S ≤ 2       | 1   | R/S ≤ 2         | 1   | R/S ≤ 1                | 1   | R/S ≤ 1                | 1   |
|           | R ≤ 0.6 mV      | 1   | R ≤ 0.6 mV    | 1   | R ≤ 0.6 mV      | 1   | R/S ≤ 1                | 1   | R/S ≤ 1                | 1   |
| Total     | Points          |     | Points        |     | Points          | 5   | Points                 |     | Points                 |     |

| Lead     | Criteria   | Pts |
|----------|------------|-----|
| I        | any Q      | 1   |
|          | R/Q ≤ 1    | 2   |
| II       | R/S ≤ 1    | 1   |
|          | R/Q ≤ 15   | 1   |
| aVL      | R/S ≤ 15   | 1   |
|          | Q ≥ 40 ms  | 2   |
| aVF      | Q ≥ 30 ms  | 1   |
|          | R/Q ≤ 0.5  | 1   |
| V1       | R/S ≤ 0.5  | 2   |
|          | R/Q ≤ 0.5  | 1   |
| Ant.     | R/S ≤ 1    | 1   |
|          | R/Q ≤ 1    | 1   |
| V1 Post. | Q ≥ 50 ms  | 2   |
|          | Q ≥ 40 ms  | 1   |
| V2       | R/Q ≤ 0.5  | 1   |
|          | R/S ≤ 0.5  | 1   |
| Ant.     | Ntchlnit40 | 1   |
|          | R ≥ 0.3 mV | 2   |
| V2 Post. | R ≥ 30 ms  | 1   |
|          | R ≥ 0.2 mV | 1   |
| V2 Ant.  | R ≥ 20 ms  | 1   |
|          | S/S' ≥ 2.0 | 3   |
| V3       | S/S' ≥ 15  | 2   |
|          | S/S' ≥ 125 | 1   |
| V3 Ant.  | Ntchlnit40 | 1   |
|          | R ≥ 0.4 mV | 2   |
| V4       | R ≥ 30 ms  | 1   |
|          | R ≥ 0.3 mV | 1   |
| V4 Ant.  | R ≥ 20 ms  | 1   |
|          | S/S' ≥ 2.5 | 3   |
| V5       | S/S' ≥ 2.0 | 2   |
|          | S/S' ≥ 15  | 1   |
| V5 Ant.  | any Q      | 1   |
|          | R/R' ≥ 2   | 2   |
| V6       | R/R' ≥ 1   | 1   |
|          | R/S ≤ 2    | 1   |
| V6 Ant.  | R/S ≤ 2    | 1   |
|          | R ≤ 0.6 mV | 1   |
| Total    | Points     |     |

%LV infarct (3 #pts) \_\_\_\_\_

%LV infarct (3 x#pts) \_\_\_\_\_ %LV infarct (3 x#pts) 15 %LV infarct (3 x#pts) \_\_\_\_\_ %LV infarct (3 x#pts) \_\_\_\_\_

\* (for LVH) if ≥ 4 other points in leads I, aVL, V4, V5 or V6 then count QS in V1+V3

\*\* (RAO) if P positive amp in V1 ≥ 0.1 mV or aVF P ≥ 0.175 mV, then exclude V1+V2 Post criteria

\*\*\* (RAO) if P positive amp in V1 ≥ 0.1 mV or aVF P ≥ 0.175 mV, then exclude V1+V2 R-criteria points

QRS Scoring

Patient ID 11 QRS duration 102ms Amplitude adjust -14%  
 (↑1%/yr age 20-54; ↓1%/yr >55 yrs; ↓ 10% for females)

Age & gender 59 Female QRS axis -55° Duration adjust -10% RAO(\*\*, \*\*\*)Yes/No  
 (↓ 10% for females)

| Lead         | RBBB                                                                                  |     | LAFB                                                                                  |     | LAFB + RBBB                                                                           |     | LVH                                                                                   |     | No Confounders                                                                        |     |
|--------------|---------------------------------------------------------------------------------------|-----|---------------------------------------------------------------------------------------|-----|---------------------------------------------------------------------------------------|-----|---------------------------------------------------------------------------------------|-----|---------------------------------------------------------------------------------------|-----|
|              | Criteria                                                                              | Pts |
| I            | Q ≥ 30 ms<br>R/Q ≤ 1<br>R ≤ 0.2 mV                                                    | 1   | Q ≥ 30 ms<br>R/Q ≤ 1<br>R ≤ 0.2 mV                                                    | 1   | Q ≥ 30 ms<br>R/Q ≤ 1<br>R ≤ 0.2 mV                                                    | 1   | Q ≥ 30 ms<br>R/Q ≤ 1<br>R ≤ 0.2 mV                                                    | 1   | Q ≥ 30 ms<br>R/Q ≤ 1<br>R ≤ 0.2 mV                                                    | 1   |
| II           | Q ≥ 40 ms<br>Q ≥ 30 ms                                                                | 2   | Q ≥ 40 ms<br>Q ≥ 30 ms                                                                | 2   | Q ≥ 40 ms<br>Q ≥ 30 ms                                                                | 2   | Q ≥ 40 ms<br>Q ≥ 30 ms                                                                | 2   | Q ≥ 40 ms<br>Q ≥ 30 ms                                                                | 2   |
| aVL          | Q ≥ 30 ms<br>R/Q ≤ 1                                                                  | 1   | Q ≥ 40 ms<br>R/Q ≤ 1                                                                  | 1   | Q ≥ 40 ms<br>R/Q ≤ 1                                                                  | 1   | Q ≥ 40 ms<br>R/Q ≤ 1                                                                  | 1   | Q ≥ 30 ms<br>R/Q ≤ 1                                                                  | 1   |
| aVF          | Q ≥ 50 ms<br>Q ≥ 40 ms<br>Q ≥ 30 ms<br>R/Q ≤ 1<br>R/Q ≤ 2                             | 3   | Q ≥ 50 ms<br>Q ≥ 40 ms<br>Q ≥ 30 ms<br>R/Q ≤ 1<br>R/Q ≤ 2                             | 3   | Q ≥ 50 ms<br>Q ≥ 40 ms<br>Q ≥ 30 ms<br>R/Q ≤ 1<br>R/Q ≤ 2                             | 3   | Q ≥ 60 ms<br>Q ≥ 50 ms<br>Q ≥ 40 ms<br>R/Q ≤ 1<br>R/Q ≤ 2                             | 3   | Q ≥ 50 ms<br>Q ≥ 40 ms<br>Q ≥ 30 ms<br>R/Q ≤ 1<br>R/Q ≤ 2                             | 3   |
| V1 Ant.      | Q ≥ 50 ms<br>any Q<br>Init R ≤ 20 ms                                                  | 2   | any QR<br>any QR                                                                      | 1   | any Q<br>any Q                                                                        | 1   | any QR<br>(or any Q if *)<br>Ntchlnit40                                               | 1   | any Q<br>any Q                                                                        | 1   |
| V1 Post.**   | Init R ≥ 60 ms<br>Init R ≥ 15 mV<br>Init R ≥ 50 ms<br>Init R ≥ 10 mV                  | 2   | R/S ≥ 1<br>R ≥ 50 ms<br>R ≥ 1 mV<br>R ≥ 40 ms<br>R ≥ 0.7 mV                           | 1   | Init R ≥ 60 ms<br>Init R ≥ 15 mV<br>Init R ≥ 50 ms<br>Init R ≥ 10 mV                  | 2   | R/S ≥ 1<br>R ≥ 50 ms<br>R ≥ 1 mV<br>R ≥ 40 ms<br>R ≥ 0.7 mV                           | 1   | R/S ≥ 1<br>R ≥ 50 ms<br>R ≥ 1 mV<br>R ≥ 40 ms<br>R ≥ 0.7 mV                           | 1   |
| V2 Ant.      | Q ≥ 50 ms<br>any Q<br>R ≤ 10 ms<br>R ≤ 0.1 mV                                         | 2   | any QR<br>any QR<br>R ≤ 10 ms<br>R ≤ 0.1 mV                                           | 1   | Q ≥ 50 ms<br>any Q<br>R ≤ 10 ms<br>R ≤ 0.1 mV                                         | 2   | any QR<br>(or any Q if *)<br>Ntchlnit40                                               | 1   | any Q<br>R ≤ 10 ms<br>R ≤ 0.1 mV                                                      | 1   |
| V2 Post.**   | Init R ≥ 70 ms<br>Init R ≥ 2.5 mV<br>Init R ≥ 50 ms<br>Init R ≥ 2.0 mV                | 2   | R/S ≥ 15<br>R ≥ 60 ms<br>R ≥ 2 mV<br>R ≥ 50 ms<br>R ≥ 15 mV                           | 1   | Init R ≥ 70 ms<br>Init R ≥ 2.5 mV<br>Init R ≥ 50 ms<br>Init R ≥ 2.0 mV                | 2   | R/S ≥ 15<br>R ≥ 60 ms<br>R ≥ 2 mV<br>R ≥ 50 ms<br>R ≥ 15 mV                           | 1   | R/S ≥ 15<br>R ≥ 60 ms<br>R ≥ 2 mV<br>R ≥ 50 ms<br>R ≥ 15 mV                           | 1   |
| V3           | Q ≥ 30 ms<br>R ≤ 10 ms<br>Q ≥ 20 ms<br>R ≤ 20 ms                                      | 2   | Q ≥ 30 ms<br>R ≤ 10 ms<br>Q ≥ 20 ms<br>R ≤ 20 ms                                      | 2   | Q ≥ 30 ms<br>R ≤ 10 ms<br>Q ≥ 20 ms<br>R ≤ 20 ms                                      | 2   | QR& (Q ≥ 30 ms)<br>Ntchlnit40<br>any QR<br>(or any Q if *)                            | 1   | Q ≥ 30 ms<br>R ≤ 10 ms<br>Q ≥ 20 ms<br>R ≤ 20 ms                                      | 2   |
| V4           | Q ≥ 20 ms<br>R/Q ≤ 0.5<br>R/S ≤ 0.5<br>R/Q ≤ 1<br>R/S ≤ 1<br>R ≤ 0.5 mV<br>Ntchlnit40 | 1   | Q ≥ 20 ms<br>R/Q ≤ 0.5<br>R/S ≤ 0.5<br>R/Q ≤ 1<br>R/S ≤ 1<br>R ≤ 0.5 mV<br>Ntchlnit40 | 1   | Q ≥ 20 ms<br>R/Q ≤ 0.5<br>R/S ≤ 0.5<br>R/Q ≤ 1<br>R/S ≤ 1<br>R ≤ 0.5 mV<br>Ntchlnit40 | 1   | Q ≥ 20 ms<br>R/Q ≤ 0.5<br>R/S ≤ 0.5<br>R/Q ≤ 1<br>R/S ≤ 1<br>R ≤ 0.5 mV<br>Ntchlnit40 | 1   | Q ≥ 20 ms<br>R/Q ≤ 0.5<br>R/S ≤ 0.5<br>R/Q ≤ 1<br>R/S ≤ 1<br>R ≤ 0.5 mV<br>Ntchlnit40 | 1   |
| V5           | Q ≥ 30 ms<br>R/Q ≤ 1<br>R/S ≤ 1<br>R/Q ≤ 2<br>R/S ≤ 2<br>R ≤ 0.6 mV<br>Ntchlnit40     | 1   | Q ≥ 30 ms<br>R/Q ≤ 1<br>R/S ≤ 1<br>R/Q ≤ 2<br>R/S ≤ 2<br>R ≤ 0.6 mV<br>Ntchlnit40     | 1   | Q ≥ 30 ms<br>R/Q ≤ 1<br>R/S ≤ 1<br>R/Q ≤ 2<br>R/S ≤ 2<br>R ≤ 0.6 mV<br>Ntchlnit40     | 1   | Q ≥ 30 ms<br>R/Q ≤ 1<br>R/S ≤ 1<br>R/Q ≤ 2<br>R/S ≤ 2<br>R ≤ 0.6 mV<br>Ntchlnit40     | 1   | Q ≥ 30 ms<br>R/Q ≤ 1<br>R/S ≤ 1<br>R/Q ≤ 2<br>R/S ≤ 2<br>R ≤ 0.6 mV<br>Ntchlnit40     | 1   |
| V6           | Q ≥ 30 ms<br>R/Q ≤ 1<br>R/S ≤ 1<br>R/Q ≤ 3<br>R/S ≤ 3<br>R ≤ 0.6 mV<br>Ntchlnit40     | 1   | Q ≥ 30 ms<br>R/Q ≤ 1<br>R/S ≤ 1<br>R/Q ≤ 3<br>R/S ≤ 3<br>R ≤ 0.6 mV<br>Ntchlnit40     | 1   | Q ≥ 30 ms<br>R/Q ≤ 1<br>R/S ≤ 1<br>R/Q ≤ 3<br>R/S ≤ 3<br>R ≤ 0.6 mV<br>Ntchlnit40     | 1   | Q ≥ 30 ms<br>R/Q ≤ 1<br>R/S ≤ 1<br>R/Q ≤ 3<br>R/S ≤ 3<br>R ≤ 0.6 mV<br>Ntchlnit40     | 1   | Q ≥ 30 ms<br>R/Q ≤ 1<br>R/S ≤ 1<br>R/Q ≤ 3<br>R/S ≤ 3<br>R ≤ 0.6 mV<br>Ntchlnit40     | 1   |
| <b>Total</b> | Points                                                                                |     | Points                                                                                | 0   | Points                                                                                |     | Points                                                                                |     | Points                                                                                |     |

| Lead         | Criteria                                                         | Pts |
|--------------|------------------------------------------------------------------|-----|
| I            | any Q<br>R/Q ≤ 1<br>R/S ≤ 1<br>R/Q ≤ 15<br>R/S ≤ 15              | 1   |
| II           | Q ≥ 40 ms<br>Q ≥ 30 ms<br>R/S ≤ 0.5                              | 2   |
| aVL          | Q ≥ 50 ms<br>Q ≥ 40 ms<br>R/S ≤ 0.5                              | 2   |
| aVF          | Q ≥ 50 ms<br>Q ≥ 40 ms<br>R/S ≤ 0.5                              | 2   |
| V1 Ant.***   | Ntchlnit40<br>R ≥ 0.3 mV<br>R ≥ 30 ms<br>R ≥ 0.2 mV<br>R ≥ 20 ms | 1   |
| V1 Post      | S/S' ≥ 2.0<br>S/S' ≥ 15<br>S/S' ≥ 125                            | 3   |
| V2 Ant.***   | Ntchlnit40<br>R ≥ 0.4 mV<br>R ≥ 30 ms<br>R ≥ 0.3 mV<br>R ≥ 20 ms | 1   |
| V2 Post      | S/S' ≥ 2.5<br>S/S' ≥ 2.0<br>S/S' ≥ 15                            | 3   |
| V5           | any Q<br>R/R' ≥ 2<br>R/R' ≥ 1<br>R/S ≤ 2<br>R ≤ 0.6 mV           | 1   |
| V6           | Q ≥ 20 ms<br>R/R' ≥ 2<br>R/R' ≥ 1<br>R/S ≤ 2<br>R ≤ 0.6 mV       | 1   |
| <b>Total</b> | Points                                                           |     |

%LV infarct \_\_\_\_\_  
 (3 #pts)

%LV infarct \_\_\_\_\_  
 (3 x #pts)    0    %LV infarct \_\_\_\_\_  
 (3 x #pts)    %LV infarct \_\_\_\_\_  
 (3 x #pts)    %LV infarct \_\_\_\_\_  
 (3 x #pts)

\* (for LVH) if ≥ 4 other points in leads I, aVL, V4, V5 or V6 then count QS in V1+V3

\*\* (RAO) if P positive amp in V1 ≥ 0.1 mV or aVF P ≥ 0.175 mV, then exclude V1+V2 Post criteria

\*\*\* (RAO) if P positive amp in V1 ≥ 0.1 mV or aVF P ≥ 0.175 mV, then exclude V1+V2 R-criteria points

QRS Scoring

Patient ID 12 QRS duration 78ms Amplitude adjust -3%  
 (↑1%/yr age 20-54; ↓1%/yr >55 yrs; ↓ 10% for females)

Age & gender 58 Male QRS axis +94° Duration adjust 0% RAO(\*\*, \*\*\* Yes)  
 (↓ 10% for females)

| Lead       | RBBB            |     | LAFB          |     | LAFB + RBBB     |     | LVH                    |     | No Confounders         |     |
|------------|-----------------|-----|---------------|-----|-----------------|-----|------------------------|-----|------------------------|-----|
|            | Criteria        | Pts | Criteria      | Pts | Criteria        | Pts | Criteria               | Pts | Criteria               | Pts |
| I          | Q ≥ 30 ms       | 1   | Q ≥ 30 ms     | 1   | Q ≥ 30 ms       | 1   | Q ≥ 30 ms              | 1   | Q ≥ 30 ms              | 1   |
|            | R/Q ≤ 1         | 1   | R/Q ≤ 1       | 1   | R/Q ≤ 1         | 1   | R/Q ≤ 1                | 1   | R/Q ≤ 1                | 1   |
| II         | R ≤ 0.2 mV      | 2   | R ≤ 0.2 mV    | 2   | R ≤ 0.2 mV      | 2   | R ≤ 0.2 mV             | 2   | R ≤ 0.2 mV             | 2   |
|            | Q ≥ 40 ms       | 2   | Q ≥ 40 ms     | 2   | Q ≥ 40 ms       | 2   | Q ≥ 40 ms              | 2   | Q ≥ 40 ms              | 2   |
| aVL        | Q ≥ 30 ms       | 1   | Q ≥ 30 ms     | 1   | Q ≥ 30 ms       | 1   | Q ≥ 30 ms              | 1   | Q ≥ 30 ms              | 1   |
|            | R/Q ≤ 1         | 1   | R/Q ≤ 1       | 1   | R/Q ≤ 1         | 1   | R/Q ≤ 1                | 1   | R/Q ≤ 1                | 1   |
| aVF        | Q ≥ 50 ms       | 3   | Q ≥ 50 ms     | 3   | Q ≥ 50 ms       | 3   | Q ≥ 50 ms              | 3   | Q ≥ 50 ms              | 3   |
|            | Q ≥ 40 ms       | 2   | Q ≥ 40 ms     | 2   | Q ≥ 40 ms       | 2   | Q ≥ 40 ms              | 2   | Q ≥ 40 ms              | 2   |
| V1         | Q ≥ 30 ms       | 1   | Q ≥ 30 ms     | 1   | Q ≥ 30 ms       | 1   | Q ≥ 30 ms              | 1   | Q ≥ 30 ms              | 1   |
|            | R/Q ≤ 1         | 2   | R/Q ≤ 1       | 2   | R/Q ≤ 1         | 2   | R/Q ≤ 1                | 2   | R/Q ≤ 1                | 2   |
| Ant.       | R/Q ≤ 2         | 1   | R/Q ≤ 2       | 1   | R/Q ≤ 2         | 1   | R/Q ≤ 2                | 1   | R/Q ≤ 2                | 1   |
|            | any Q           | 1   | any QR        | 1   | any Q           | 1   | any QR (or any Q if *) | 1   | any Q                  | 1   |
| V1 Post.*  | Init R ≥ 60 ms  | 2   | R/S ≥ 1       | 1   | Init R ≥ 60 ms  | 2   | R/S ≥ 1                | 1   | R/S ≥ 1                | 1   |
|            | Init R ≥ 15 mV  | 1   | R ≥ 1 mV      | 1   | Init R ≥ 15 mV  | 1   | R ≥ 1 mV               | 1   | R ≥ 1 mV               | 1   |
| V2         | Init R ≥ 50 ms  | 1   | R ≥ 40 ms     | 1   | Init R ≥ 50 ms  | 1   | R ≥ 40 ms              | 1   | R ≥ 40 ms              | 1   |
|            | Init R ≥ 10 mV  | 1   | R ≥ 0.7 mV    | 1   | Init R ≥ 10 mV  | 1   | R ≥ 0.7 mV             | 1   | R ≥ 0.7 mV             | 1   |
| Ant.***    | Q ≥ 50 ms       | 2   | Qs0.2&S≤0.2mV | 1   | Q ≥ 50 ms       | 2   | Qs0.2&S≤0.2 mV         | 1   | Qs0.2&S≤0.2mV          | 1   |
|            | any Q           | 1   | any QR        | 1   | any Q           | 1   | any QR (or any Q if *) | 1   | any Q                  | 1   |
| V2 Post.*  | R ≤ 10 ms       | 1   | R ≤ 0.1 mV    | 1   | R ≤ 10 ms       | 1   | R ≤ 0.1 mV             | 1   | R ≤ 10 ms              | 1   |
|            | R ≤ 0.1 mV      | 1   | R/S ≥ 15      | 1   | R ≤ 0.1 mV      | 1   | R/S ≥ 15               | 1   | R/S ≥ 15               | 1   |
| V2 Ant.*** | Init R ≥ 70 ms  | 2   | R ≥ 60 ms     | 2   | Init R ≥ 70 ms  | 2   | R ≥ 60 ms              | 2   | R ≥ 60 ms              | 2   |
|            | Init R ≥ 2.5 mV | 1   | R ≥ 2 mV      | 1   | Init R ≥ 2.5 mV | 1   | R ≥ 2 mV               | 1   | R ≥ 2 mV               | 1   |
| V3         | Init R ≥ 50 ms  | 1   | R ≥ 50 ms     | 1   | Init R ≥ 50 ms  | 1   | R ≥ 50 ms              | 1   | R ≥ 50 ms              | 1   |
|            | Init R ≥ 2.0 mV | 1   | R ≥ 15 mV     | 1   | Init R ≥ 2.0 mV | 1   | R ≥ 15 mV              | 1   | R ≥ 15 mV              | 1   |
| V3 Post.   | Q ≥ 30 ms       | 2   | Q ≥ 30 ms     | 2   | Q ≥ 30 ms       | 2   | Qs0.3&S≤0.3mV          | 1   | Qs0.3&S≤0.3mV          | 1   |
|            | R ≤ 10 ms       | 1   | R ≤ 10 ms     | 1   | R ≤ 10 ms       | 1   | QR&(Q ≥ 30 ms)         | 2   | QR&(Q ≥ 30 ms)         | 2   |
| V4         | Q ≥ 20 ms       | 1   | Q ≥ 20 ms     | 1   | Q ≥ 20 ms       | 1   | Ntchlnit40             | 1   | Ntchlnit40             | 1   |
|            | R/Q ≤ 0.5       | 2   | R/Q ≤ 0.5     | 2   | R/Q ≤ 0.5       | 2   | any QR (or any Q if *) | 1   | any QR (or any Q if *) | 1   |
| V5         | R/S ≤ 0.5       | 1   | R/S ≤ 0.5     | 1   | R/S ≤ 0.5       | 1   | Q ≥ 20 ms              | 1   | Q ≥ 20 ms              | 1   |
|            | R/Q ≤ 1         | 1   | R/Q ≤ 1       | 1   | R/Q ≤ 1         | 1   | R/Q ≤ 0.5              | 2   | R/Q ≤ 0.5              | 2   |
| V5 Post.   | R/S ≤ 1         | 1   | R/S ≤ 1       | 1   | R/S ≤ 1         | 1   | R/S ≤ 0.5              | 1   | R/S ≤ 0.5              | 1   |
|            | R/Q ≤ 2         | 1   | R/S ≤ 1       | 1   | R/Q ≤ 2         | 1   | R/Q ≤ 1                | 1   | R/Q ≤ 1                | 1   |
| V6         | R/S ≤ 2         | 1   | R/S ≤ 15      | 1   | R/S ≤ 2         | 1   | R/S ≤ 1                | 1   | R/S ≤ 1                | 1   |
|            | R ≤ 0.6 mV      | 1   | R ≤ 0.6 mV    | 1   | R ≤ 0.6 mV      | 1   | R ≤ 0.5 mV             | 1   | R ≤ 0.5 mV             | 1   |
| Total      | Q ≥ 30 ms       | 1   | Q ≥ 30 ms     | 1   | Q ≥ 30 ms       | 1   | Q ≥ 30 ms              | 1   | Q ≥ 30 ms              | 1   |
|            | R/Q ≤ 1         | 2   | R/Q ≤ 1       | 2   | R/Q ≤ 1         | 2   | R/Q ≤ 1                | 2   | R/Q ≤ 1                | 2   |
| Total      | R/S ≤ 1         | 1   | R/S ≤ 1       | 1   | R/S ≤ 1         | 1   | R/S ≤ 1                | 1   | R/S ≤ 1                | 1   |
|            | R/Q ≤ 3         | 1   | R/Q ≤ 3       | 1   | R/Q ≤ 3         | 1   | R/Q ≤ 3                | 1   | R/Q ≤ 3                | 1   |
| Total      | R/S ≤ 3         | 1   | R/S ≤ 2       | 1   | R/S ≤ 3         | 1   | R/S ≤ 3                | 1   | R/S ≤ 3                | 1   |
|            | R ≤ 0.6 mV      | 1   | R ≤ 0.6 mV    | 1   | R ≤ 0.6 mV      | 1   | R ≤ 0.6 mV             | 1   | R ≤ 0.6 mV             | 1   |
| Total      | Ntchlnit40      | 1   | Ntchlnit40    | 1   | Ntchlnit40      | 1   | Ntchlnit40             | 1   | Ntchlnit40             | 1   |
|            | Points          |     | Points        |     | Points          |     | Points                 | 7   | Points                 |     |

| Lead    | Criteria   | Pts |
|---------|------------|-----|
| I       | any Q      | 1   |
|         | R/Q ≤ 1    | 2   |
| II      | R/S ≤ 1    | 1   |
|         | R/Q ≤ 15   | 1   |
| aVL     | R/S ≤ 15   | 1   |
|         | Q ≥ 40 ms  | 2   |
| aVF     | Q ≥ 30 ms  | 1   |
|         | R/Q ≤ 0.5  | 1   |
| V1      | Q ≥ 50 ms  | 2   |
|         | R/S ≤ 0.5  | 1   |
| Ant.    | R/Q ≤ 0.5  | 1   |
|         | R/S ≤ 1    | 1   |
| aVF     | R/Q ≤ 1    | 1   |
|         | Q ≥ 50 ms  | 2   |
| V1      | Q ≥ 40 ms  | 1   |
|         | R/Q ≤ 0.5  | 1   |
| Ant.*** | R/S ≤ 0.5  | 1   |
|         | Ntchlnit40 | 1   |
| V1      | R ≥ 0.3 mV | 2   |
|         | R ≥ 30 ms  | 1   |
| Ant.*** | R ≥ 0.2 mV | 1   |
|         | R ≥ 20 ms  | 1   |
| V1      | S/S' ≥ 2.0 | 3   |
|         | S/S' ≥ 15  | 2   |
| Post    | S/S' ≥ 125 | 1   |
|         | S/S' ≥ 125 | 1   |
| V2      | Ntchlnit40 | 1   |
|         | R ≥ 0.4 mV | 2   |
| Ant.*** | R ≥ 30 ms  | 1   |
|         | R ≥ 0.3 mV | 1   |
| V2      | R ≥ 20 ms  | 1   |
|         | S/S' ≥ 2.5 | 3   |
| Post    | S/S' ≥ 2.0 | 2   |
|         | S/S' ≥ 15  | 1   |
| V5      | any Q      | 1   |
|         | R/R' ≥ 2   | 2   |
| V6      | R/R' ≥ 1   | 1   |
|         | R/S ≤ 2    | 1   |
| Total   | R ≤ 0.6 mV | 1   |
|         | Points     |     |

%LV infarct (3 #pts) \_\_\_\_\_

%LV infarct (3 x#pts) \_\_\_\_\_ %LV infarct (3 x#pts) \_\_\_\_\_ %LV infarct (3 x#pts) \_\_\_\_\_ 21 %LV infarct (3 x#pts) \_\_\_\_\_

\* (for LVH) if ≥ 4 other points in leads I, aVL, V4, V5 or V6 then count QS in V1+V3

\*\* (RAO) if P positive amp in V1 ≥ 0.1 mV or aVF P ≥ 0.175 mV, then exclude V1+V2 Post criteria

\*\*\* (RAO) if P positive amp in V1 ≥ 0.1 mV or aVF P ≥ 0.175 mV, then exclude V1+V2 R-criteria points
